# Supplementary material for: Identification of tumor antigens and immunogenic cell death-related subtypes for the improvement of immunotherapy of breast cancer
Source: Front Cell Dev Biol. 2022 Oct 25;10:962389. doi: 10.3389/fcell.2022.962389 (PMC9641162; doi:10.3389/fcell.2022.962389)
Supplement: Supplementary file 10 [file Table8.XLSX]

## Sheet: Immune cells
ID	Risk group	Risk score	B cell	T cell CD4+ memory	T cell CD4+ naive	T cell CD8+ naive	T cell CD8+	T cell CD8+ central memory	Myeloid dendritic cell	Endothelial cell	Macrophage	Macrophage M1	Macrophage M2	Monocyte	Neutrophil	NK cell	T cell gamma delta	T cell CD4+ Th1	T cell CD4+ Th2	T cell regulatory (Tregs)	immune score	stroma score	microenvironment score
TCGA-E2-A14T-01	High	1.08019	0.0135	0.00162	0	0.00522	0.00139	8.65e-20	0.0019	0.0109	0.0737	0.0299	0.0899	0.00414	0	1.83e-18	0	0.0764	0.0718	2.15e-18	0.0709	0.0587	0.13
TCGA-BH-A8FY-01	Low	1.07954	0	0	1.83e-17	9.42e-18	0	0	1.18e-18	0.0657	0.023	0.0126	0.0245	0	0	0	1.98e-17	0.116	7.13e-18	0	0.0249	0.0345	0.0594
TCGA-A2-A0T4-01	Low	1.07916	0	0	0	0.00472	0.00256	0.075	0.0185	0.113	0.0459	0.0138	0.0635	0.00465	0.00132	3.6e-18	2.35e-17	0.0306	0.213	2.94e-20	0.0618	0.268	0.329
TCGA-A2-A04P-01	Low	1.07796	0.133	0	7.84e-18	2.55e-19	4.75e-19	0.022	0.0189	0.0712	0.0152	0.0225	0.0197	6.4e-19	0	1.03e-18	0	0.169	0.208	0.00992	0.111	0.048	0.159
TCGA-AC-A6IW-01	Low	1.07767	0.106	0.00771	0.0121	0.0126	0.104	0.178	0.0815	0.0179	0.128	0.0942	0.0631	0.0438	1.57e-18	9.56e-20	0	0.246	0.455	4e-20	0.317	0.0108	0.327
TCGA-AC-A2FO-01	Low	1.07631	0.113	0.0175	0.0132	0.00219	0.0664	0.16	0.0214	0.0912	0.0113	0.000125	0.0457	0.0157	1.5e-19	4.78e-18	2.61e-18	0.00955	0.0698	4.87e-19	0.162	0.201	0.363
TCGA-A7-A0DA-01	High	1.08031	1.04e-18	8.14e-19	2.89e-18	0	0	2.86e-18	1.52e-18	0	0.00329	0.00287	0.0194	0	0	0	0	0.0535	0.0533	0	0.00814	0.0328	0.0409
TCGA-BH-A0DG-01	Low	1.07598	0.0294	2.17e-19	0	0.00145	0	0.0237	0.0162	0.077	0.0487	0.0224	0.0619	6.01e-18	0	4.55e-19	1.49e-18	0.082	0.0551	0	0.0689	0.135	0.204
TCGA-E9-A1RD-01	High	1.08052	0	0	0	0	0	0.00801	2.1e-22	0.044	0.0371	0.00592	0.0332	6.01e-18	9.52e-20	8.01e-18	6.2e-18	0.0544	0.0433	0	0.0439	0.0237	0.0676
TCGA-AR-A24O-01	High	1.08278	0	0.0112	3.17e-19	0.0031	0.00737	0.06	0.0029	0.141	0.0149	8.7e-21	0.0446	3.52e-18	0.000523	1.48e-18	2.12e-18	0	0.126	0	0.0285	0.266	0.295
TCGA-E2-A14X-01	Low	1.07553	0.204	0.0186	6.65e-20	0.00301	0.0709	0.0912	0.0152	0.0411	0.0178	0.011	0.0307	1.26e-18	1.1e-18	2.67e-19	7.09e-20	0.07	0.183	0	0.215	0.0407	0.256
TCGA-D8-A141-01	Low	1.0751	0.107	0.0176	0.0657	0.0183	0.145	0.238	0.0312	0.0435	0.0495	0.0232	0.055	0.0134	0	4.75e-18	7.69e-19	0.0527	0.085	0.015	0.247	0.0977	0.345
TCGA-D8-A1XM-01	Low	1.07452	0.0464	0.019	1.76e-18	0.00762	0.041	0.0808	0.0332	0.0253	0.0568	0.0114	0.0767	0.0464	1.37e-20	3.84e-18	7.19e-19	0.0246	0.127	0.0158	0.175	0.168	0.343
TCGA-BH-A0HL-01	High	1.08395	0.00154	0	1.45e-18	3.2e-21	0	0	0	0.0155	2.5e-19	1.84e-18	0.00791	0	1.54e-18	5.98e-18	0	0.0614	0.0755	0.00928	0.00921	0.00775	0.017
TCGA-B6-A0RQ-01	Low	1.0707	8.79e-19	1.97e-18	0	0	7.67e-19	0	0	0.0398	0	0	0.0169	0	0	0	0	0.0219	3.77e-18	1.03e-18	0.00485	0.0697	0.0745
TCGA-E2-A1B1-01	Low	1.07056	7.81e-20	0.0311	0	0.0172	0.0468	0.0828	0.0319	0.0651	0.0712	0.0339	0.0759	0.0153	0.00113	0	0	0	0.144	0.0149	0.121	0.126	0.247
TCGA-BH-A0HK-01	High	1.08472	1.02e-18	5.33e-19	1.85e-17	6.75e-19	0	0.0163	0	0.132	0	0	0.0266	1.92e-17	4.74e-18	1.53e-17	2.55e-18	0.0429	0.0262	9.65e-18	3.04e-17	0.253	0.253
TCGA-E9-A54Y-01	High	1.08554	0.102	1.7e-18	0	0.00674	5.71e-19	0.00735	1.46e-19	0	0.0217	0.0156	0.0439	0.00569	0	0	0	0.279	0.0494	0	0.0937	6.47e-19	0.0937
TCGA-AR-A1AJ-01	Low	1.06926	0.231	0.0616	0.0369	0.00339	0.114	0.215	0.136	0.04	0.0944	0.0709	0.0644	0.0712	0	0	0.0168	0.117	0.337	0.0412	0.447	0.166	0.613
TCGA-XX-A89A-01	Low	1.06896	5.17e-19	0	0.0148	2.54e-21	0.0234	0.0625	0.0157	0.0978	0.0515	0.0187	0.0817	0.0266	0	7.98e-18	4.48e-18	0.0165	0.0502	0	0.0819	0.328	0.41
TCGA-A2-A0EV-01	High	1.08562	0.0304	0.00704	0	0	0.0055	0.0321	0.0177	0.0198	0.0514	0.0204	0.0668	8.11e-19	6.6e-19	5.96e-19	0	0.0624	0.085	0	0.0829	0.0648	0.148
TCGA-E2-A1IG-01	Low	1.06882	6.41e-19	0	3.2e-19	0.00428	4.79e-19	0	0	0.0476	0.0183	0.00145	0.0366	0	0	0	1.11e-18	0.11	0.0133	1.22e-19	0.0187	0.0502	0.0689
TCGA-A2-A0CS-01	High	1.08605	1.89e-18	0	5.53e-18	0	0	0	0.0294	0.0128	0.0397	0.0185	0.0319	0	0	0	0	0.0863	0.00691	8.25e-21	0.0545	0.0643	0.119
TCGA-D8-A27T-01	Low	1.06731	0	0.000484	0.0073	0.00673	0.0256	0.0786	0.0196	0.0447	0.0413	0.0155	0.0529	0.021	0	1.25e-18	0	0.087	0.0366	1.68e-19	0.083	0.149	0.232
TCGA-BH-A0HQ-01	Low	1.06721	1.23e-19	0	0	0	2.05e-19	7.52e-19	0.00304	0.0214	0.0189	0.00319	0.0331	6.14e-19	0	9.97e-18	0	0.0695	0	0	0.0346	0.0273	0.0619
TCGA-A2-A4S2-01	High	1.08872	0.00859	0	0.0122	2.62e-20	0.0171	0.0851	0.00729	0.0428	0.0334	0.0259	0.045	0	0	2.72e-18	2.63e-18	0.0949	0	0.00231	0.0503	0.0538	0.104
TCGA-A2-A3XS-01	Low	1.06714	0.043	3.03e-18	0	0.00386	0.00141	0.0138	0.0145	0.0529	0.0129	0.00847	0.0359	5.03e-18	0	6.31e-19	5.7e-18	0.174	0.0512	3.01e-19	0.0486	0.05	0.0986
TCGA-AO-A03L-01	High	1.08917	0.003	0	0	0.00719	0.00542	0.0746	0.00386	0.0219	0.0102	0.0194	0.0173	1.74e-18	0	0	1.18e-17	0.108	0.218	4.6e-18	0.0275	0.0509	0.0784
TCGA-BH-A1FL-01	High	1.08959	0.00412	8.1e-19	3.08e-18	0.00762	0	0.016	0	0.0258	0	6.75e-18	0.0253	0	0	5.87e-19	6.68e-18	0.0679	0.0518	0	0.0231	0.0649	0.088
TCGA-A7-A5ZW-01	Low	1.06547	0	0	6.09e-18	0.00436	0	0.0315	0.0102	0.0488	0.0208	0.00772	0.0223	0	1.17e-19	5.83e-18	0	0.0268	0.0483	0.00749	0.0353	0.114	0.15
TCGA-AR-A2LJ-01	Low	1.06508	0.0128	0	0.00218	0	0.00489	0.0502	0.0362	0.0696	0.109	0.0544	0.14	0.0335	0	1.39e-17	1.22e-17	0.106	0.0345	0	0.139	0.174	0.313
TCGA-D8-A1XQ-01	Low	1.06489	0.0962	0.0213	0.00544	0.00724	0.0515	0.0908	0.0254	0.00295	0.0798	0.0766	0.0455	0.0452	0	0	2.05e-18	0.106	0.16	0.0143	0.212	0.0335	0.245
TCGA-AQ-A04H-01	Low	1.06422	0.000622	0.0146	0	0.0048	0.0105	0.0192	0.00511	0.0917	0.0121	0.00234	0.0322	0.00598	0	0	0	0.0675	0.145	0.00443	0.033	0.0482	0.0812
TCGA-BH-A0B8-01	Low	1.06391	3.53e-18	0	0	0.00364	0	0.0027	0	0.0348	0.00114	7.23e-20	0.0254	1.09e-17	7.46e-19	7.72e-19	0	0.0744	0.0467	4.43e-18	0.0143	0.07	0.0843
TCGA-AN-A03X-01	Low	1.06177	0	1.26e-18	0	0.00108	3.28e-18	0.000161	0.00358	0.04	0.0271	0.00873	0.0388	4.33e-19	0.00324	7.29e-18	9.22e-18	0.0405	0.0327	0	0.0332	0.135	0.169
TCGA-BH-A0HX-01	High	1.0913	0	0	0	0.00795	1.35e-19	0.00921	0.00177	0.0622	0.0241	0.00353	0.0445	2.86e-18	0	0	0	0.0604	0.103	2.83e-18	0.0175	0.0852	0.103
TCGA-AC-A8OP-01	Low	1.06154	9.26e-20	0	0	0.00878	0.00625	0.0234	0.00518	0.0603	6.18e-20	2.36e-18	0.0303	0.00271	8.28e-20	1.26e-18	8.52e-18	0.0571	0.0349	0	0.026	0.105	0.131
TCGA-A8-A09Q-01	Low	1.05944	0.0951	0.0348	0.00269	0.00892	0.0154	0.077	0.0202	0.0215	0.107	0.0534	0.08	0.0282	1.69e-19	6.33e-18	8.69e-19	0.0763	0.179	0.00188	0.207	0.031	0.238
TCGA-B6-A0IG-01	Low	1.05872	0.00698	0	4.56e-18	0.000448	1.71e-18	0	0.00624	0.0174	0.00245	0.0021	0.0124	0	5.9e-19	5.13e-19	1.3e-17	0.167	0.0803	3.33e-18	0.013	0.0516	0.0647
TCGA-LL-A5YM-01	High	1.09236	0	8.63e-19	0	0	0	0	0.00116	0.0992	0.0281	0.0221	0.0748	0	0	3.77e-19	0	0.248	0.02	0	0.0271	0.16	0.187
TCGA-BH-A18S-01	High	1.09317	0.00946	0.00838	1.85e-18	0.00606	0.0237	0.0415	0.000762	0.0114	0.0483	0.014	0.039	0.00184	8.75e-19	0	0	0.0667	0.0327	0	0.0719	0.00572	0.0776
TCGA-AC-A2BK-01	High	1.094	3.72e-19	0.008	0	0.00272	0	0.000858	0	0	7.63e-20	0	0.00294	4.12e-18	0	5.02e-18	0	0.0965	0.343	2.07e-18	0.00588	7.34e-18	0.00588
TCGA-A2-A3XX-01	Low	1.05798	0.084	2.52e-18	0	2.64e-19	0.0147	0	0.0112	0.00934	0.0195	0.0157	0.0436	8.07e-18	0	6.68e-19	0	0.2	0.108	0	0.0878	0.00467	0.0924
TCGA-BH-A0EI-01	Low	1.05789	0	0	1.43e-17	0.00784	9.27e-19	0	2.04e-20	0.0239	0.00586	0	0.0204	0	0	1e-17	3.13e-18	0.0313	0.0264	0	0.0201	0.0437	0.0637
TCGA-A2-A04W-01	Low	1.0562	3.6e-18	0	0	0	0	0	5.93e-20	0.0353	0.0223	0.0169	0.0307	0	0	1.6e-18	0	0.0331	0.119	0	0.0173	0.0777	0.095
TCGA-GM-A5PX-01	Low	1.05542	0	3.48e-18	1.53e-18	0.0066	9.51e-19	0.0149	0	0.113	0	0	0.0487	0	0	1.47e-19	1.46e-17	0.0496	0.013	7.9e-19	0.00407	0.215	0.22
TCGA-AQ-A04L-01	Low	1.05497	0.000494	0	0	0.0003	1.24e-18	4.87e-18	0	0.0139	0.0283	0.00751	0.0374	0.00518	0.000132	5.35e-19	0	0.051	0.0393	0.00644	0.0283	0.0462	0.0744
TCGA-A2-A1G0-01	Low	1.05425	0.0338	0.00955	0.00729	0.0139	0.033	0.0769	0.0107	0.0531	0.0158	0	0.0331	0.00305	0	1.51e-20	1.95e-18	0.023	0.0214	0.000703	0.0833	0.122	0.205
TCGA-AO-A0JE-01	High	1.09481	0.0375	0.0156	0.000111	0.0064	0.0764	0.142	0.0162	0.0406	0.0693	0.0575	0.0433	0.0108	2.37e-19	0	0	0.067	0.204	0.0263	0.15	0.0384	0.188
TCGA-C8-A1HO-01	Low	1.05202	0.00415	0	8.34e-19	0.0172	2.16e-19	0.0044	0.000463	0.0104	0.00759	0.000752	0.0268	0	2.77e-18	0	0	0.131	0.0855	0	0.0203	0.0052	0.0255
TCGA-D8-A1XA-01	Low	1.05149	0.0354	0.0055	1.72e-18	0.00642	0.00828	0.0159	0	1.66e-18	0.0454	0.02	0.0561	0.00231	0.00044	0	0.00501	0.0474	0.0201	0.0032	0.0921	0.027	0.119
TCGA-E2-A10B-01	High	1.09818	0.000579	0	8.11e-19	0	0	0.00998	0.00276	0.0131	0.0246	0.00303	0.039	1.62e-18	0	3.36e-19	2.34e-18	0.038	0.0965	3.08e-20	0.0212	0.0695	0.0907
TCGA-BH-A0DO-01	Low	1.05111	0.0121	6.32e-19	1.53e-19	0.00558	1.31e-18	0.00511	5.38e-20	0.0367	0	0	0.0181	1.66e-18	1.94e-19	8.32e-18	0	0.0275	0	0.00814	0.0174	0.106	0.124
TCGA-E2-A109-01	Low	1.05098	0.00909	0.00947	0	0.00921	0.0102	0.0378	0.00378	0.028	0.0102	0.00431	0.0223	0	0	5.5e-19	0	0.111	0.164	0.000912	0.0346	0.014	0.0486
TCGA-AC-A6IV-01	High	1.09908	1.56e-19	6.79e-20	0.00542	0.00248	0.0142	0.0656	0.0114	0.165	0.0672	0.0197	0.117	0.0126	0.00997	9.51e-18	1.5e-17	0.0246	0.0546	9.68e-19	0.0909	0.383	0.474
TCGA-B6-A1KI-01	High	1.09911	0	0	1.39e-17	3.13e-18	0	2.42e-18	0	0.185	0	5.3e-18	0.0239	0	0	3.35e-19	0	0.0276	0	2e-19	0.00116	0.167	0.168
TCGA-BH-A0C1-01	Low	1.04999	0	0.0112	0.00563	0	0.0221	0.0771	0.0102	0.0486	0.00607	0	0.0274	1.27e-17	0	5.37e-18	0	0.0563	0.105	0.0256	0.0325	0.0581	0.0906
TCGA-C8-A3M7-01	High	1.09935	0	9.84e-20	0	0.00679	0	0.037	0.0043	0.253	0	2.15e-18	0.0345	4.87e-18	1.35e-21	0	0	0.0197	0.0528	0	0.00865	0.232	0.241
TCGA-E2-A1L9-01	Low	1.04961	2.38e-19	0.00126	0	0.00484	0.00472	0.0183	0.0011	0.0438	0.0749	0.0228	0.0816	0.0127	1.12e-18	0	0	0.0427	0.0741	0.0288	0.0664	0.11	0.176
TCGA-B6-A0WV-01	Low	1.04922	0	0.00426	0	0.00363	2.55e-19	0.00396	2.11e-19	9.87e-05	0	5.35e-18	0.0072	5.78e-18	0	0	4.73e-18	0.0628	0.154	6.07e-18	0.00768	0.0139	0.0215
TCGA-A2-A3XY-01	High	1.10078	0.0302	0.000238	0.0167	0.00849	0.0222	0.0324	0.0164	0.0784	0.0175	0.0147	0.0402	0.0107	0	0	3.6e-18	0.119	0.187	0.00145	0.0647	0.236	0.301
TCGA-AO-A03U-01	High	1.10081	0.0343	0.00673	6.95e-22	0	0.00256	0.0909	0.0129	0.0384	0.107	0.0606	0.0649	0.0319	0	0.00685	9.52e-18	0.0329	0.0543	1.12e-20	0.14	0.0521	0.192
TCGA-A7-A56D-01	Low	1.04912	0.017	8.94e-20	1.58e-17	1.49e-19	1.07e-17	0	0.00479	0.0125	0.0438	0.0554	0.0367	0.0185	3.33e-19	1.15e-17	0	0.252	5.15e-18	0	0.056	0.0341	0.0901
TCGA-A8-A079-01	High	1.10081	0.0322	0	0	0.00593	1.48e-19	0.0101	0.00461	0.00638	0.0437	0.0212	0.0462	0.0111	0	0	1.6e-18	0.153	0.149	0	0.0667	0.00971	0.0764
TCGA-BH-A1F6-01	High	1.10133	0.0506	4.24e-21	0	0.0134	0.0715	0.107	0.0156	0.0124	0.101	0.0933	0.056	0.0511	1.46e-05	6.86e-18	0	0.197	0.168	0	0.198	0.011	0.209
TCGA-A7-A425-01	Low	1.04864	0	0	0	0	0	0	0.00372	0.0782	0.0242	0.0126	0.0615	0.0141	0.000594	2.36e-18	0	0.0998	0	2.56e-18	0.033	0.219	0.252
TCGA-AN-A0XP-01	High	1.103	0	1.7e-18	4.58e-22	9.9e-19	0	0.00218	0	0.0406	0.0305	0.0176	0.0279	4.67e-18	0	7.07e-18	3.54e-18	0.0469	0.00849	9.5e-19	0.0289	0.0203	0.0492
TCGA-BH-A0BA-01	High	1.10494	3.75e-18	2.06e-22	1.66e-18	0.00188	2.08e-19	0.0479	0.00846	0.0942	0	0	0.0314	2.62e-18	0	7.66e-19	4.86e-18	0.0232	0.0658	0	0.0115	0.16	0.172
TCGA-AC-A2FB-01	Low	1.04786	0.133	0.0663	0.0447	0.00597	0.167	0.334	0.0383	0.0958	0.0334	0.0189	0.0322	0.00642	0	3.79e-18	8.67e-19	0.0293	0.117	9.05e-19	0.273	0.0574	0.331
TCGA-Z7-A8R5-01	Low	1.047	0.0628	0	5.29e-20	0.00217	0.00924	0.0465	0.0147	0.0912	0.0577	0.0292	0.0718	0.0225	2.03e-18	0	0	0.122	0	2.37e-18	0.113	0.101	0.214
TCGA-BH-A18Q-01	Low	1.04518	0.00238	1.9e-19	1.65e-17	0	0.0449	0.0554	0.00684	0.0112	2.71e-21	0.00106	0.0212	0	0	9.42e-19	1.04e-17	0.116	0.135	6.12e-20	0.0405	0.0449	0.0855
TCGA-BH-A1FJ-01	High	1.10536	7.8e-20	0.00304	0	5.93e-20	1.49e-18	0.00176	0	0.0101	0.00317	0	0.015	0	8.76e-19	0	5.08e-18	0.0497	0.177	4.06e-18	0.0106	0.00507	0.0157
TCGA-5L-AAT0-01	Low	1.04311	0.0269	3.13e-19	0.00534	0.0119	0.0389	0.102	0.00507	0.0416	0.0187	0.00204	0.0417	4.35e-18	0	6.53e-19	6.49e-18	0.0546	0.0199	9.33e-18	0.0716	0.0655	0.137
TCGA-B6-A0X1-01	Low	1.0426	0.0776	0.0271	2.91e-18	0.00626	0.00592	0.121	1.48e-20	0.000871	0.0656	0.0571	0.0486	0.0107	0.0007	0.0189	5.35e-19	0.209	0.52	0	0.14	0.000435	0.14
TCGA-E2-A1LG-01	High	1.10579	0.0239	0.0117	0	0.0119	0.0325	0.0518	0.00389	0	0.0115	0.00894	0.011	0	1.24e-19	9.79e-19	0.00657	0.0478	0.167	0	0.0507	0.00768	0.0584
TCGA-BH-A1FE-01	Low	1.04232	0.0854	0.0463	0.0219	0.00562	0.0866	0.156	0.0282	0.0563	0.00911	6.45e-20	0.0217	3.91e-18	0	2.02e-18	1.66e-17	0	0.298	7.43e-19	0.162	0.0776	0.239
TCGA-A7-A3RF-01	High	1.10641	2.18e-19	0	0	0.003	4.7e-19	1.14e-18	1.69e-19	0.0605	0.0298	0.0188	0.0238	0	0	1.15e-17	1.7e-17	0.112	1.03e-18	0	0.0363	0.0492	0.0855
TCGA-AC-A62X-01	High	1.10722	1.59e-18	7.42e-19	1.32e-17	0	4.22e-18	1.8e-18	0	0.0255	0	0.00278	0.00232	0	0.00667	0	1.58e-17	0.0893	0.29	0	0.00502	0.0147	0.0197
TCGA-AN-A03Y-01	High	1.1074	0.0261	1.09e-22	0	0.0119	0.029	0.0435	0.00298	0.0222	0.0079	1.37e-19	0.0532	0	0	8.3e-20	0	0.119	0.102	1.67e-18	0.057	0.0291	0.0862
TCGA-S3-A6ZG-01	High	1.10885	0.0421	4.87e-21	1.75e-18	0.00838	0	0.0229	0.000214	0	0.0174	1.68e-19	0.0347	0	0	8.46e-19	0	0.0578	0.141	0.00597	0.054	0.0076	0.0616
TCGA-GM-A2DH-01	Low	1.0411	0.126	0.0562	0.00805	0.0139	0.106	0.177	0.037	0.00668	0.0286	0.0159	0.0217	0.0133	5.48e-19	0.00199	0.00873	0.0831	0.368	0.033	0.236	0.00334	0.239
TCGA-A8-A07J-01	High	1.10944	0	6.08e-20	0	0.000936	0	0.0362	0.0148	0.0939	0.108	0.021	0.148	0.0328	3.09e-18	1.58e-17	2.09e-18	0.033	0.00752	7.42e-21	0.118	0.255	0.373
TCGA-AR-A1AH-01	High	1.11105	0	0.000246	0	0.00672	2.27e-19	4.81e-21	5.68e-19	0.0251	0.00348	0	0.00995	2.89e-18	0.00218	0	2.45e-17	0.0683	0.366	0	0.0202	0.0313	0.0515
TCGA-LL-A73Z-01	High	1.11117	0	2.28e-19	0	0.00279	0	0.037	0.0143	0.126	0.0323	0.0323	0.0328	1.23e-18	1.3e-18	6.49e-18	0	0.0809	0.0838	0	0.0311	0.124	0.155
TCGA-A7-A0CJ-01	High	1.11197	0.0364	0.00559	7.65e-19	0.00405	1.78e-20	0.00346	0.00247	0.00858	0.0222	0.0275	0.0215	5.25e-18	0	0	1.18e-17	0.213	0.0897	0.0204	0.0474	0.00519	0.0526
TCGA-A2-A0SX-01	Low	1.03969	0.146	0.0507	0.0145	0.0139	0.0904	0.161	0.0346	0.00585	0.0464	0.0226	0.0375	0.0236	7.65e-19	0	0.0163	0	0.294	0.0123	0.244	0.108	0.352
TCGA-D8-A27G-01	Low	1.03829	1.01e-19	0.00981	0	0.0168	0.0309	0.0949	0.0212	0.0269	0.0273	0.00549	0.0504	0	1.24e-18	1.49e-18	2.28e-18	0.0407	0.138	6.85e-20	0.0648	0.0659	0.131
TCGA-A1-A0SJ-01	Low	1.03818	0	1.88e-19	3.89e-18	0.00159	0	0.0306	0.00453	0.0785	0.00157	0.00192	0.0296	0	0	4.59e-18	0	0.0171	0.127	8.03e-20	0.00771	0.165	0.173
TCGA-A2-A0D2-01	Low	1.03817	0.0253	0.00239	9.45e-18	0.00185	4.12e-19	0.0533	0.0245	0.047	0.0215	0.0275	0.0229	2.43e-18	1.54e-18	4.55e-18	2.33e-18	0.11	0.332	4.96e-19	0.0494	0.0419	0.0913
TCGA-BH-A5J0-01	High	1.11227	0.00251	1.24e-19	0.00668	0.00818	0.0083	0.0742	0.0482	0.0724	0.0952	0.0608	0.0684	0.049	6.71e-19	1.37e-18	3.33e-18	0.124	0.0451	0	0.141	0.0753	0.216
TCGA-A8-A0A2-01	High	1.11277	0.0415	0.00426	0	0.011	0.0147	0.0624	0.0034	0.0207	0.0189	9.09e-19	0.0324	5.21e-19	4.03e-19	3.16e-18	0	0.0529	0.027	0.0204	0.0675	0.0376	0.105
TCGA-OL-A66J-01	High	1.1128	7.64e-18	0	0	0.00299	5.86e-19	0.00201	0.00147	0.138	0.0112	0	0.0654	2.24e-18	0	3.41e-18	4.93e-19	0.063	0.00208	8.23e-18	0.0101	0.292	0.302
TCGA-B6-A0RO-01	High	1.11338	4.29e-19	0	1.99e-18	0.00146	6.58e-20	0.0235	0	0.0144	0.015	0.00572	0.0211	0	0	2.45e-17	0	0.0453	0.0645	0	0.0126	0.0331	0.0457
TCGA-A2-A0CL-01	Low	1.03817	0.361	0.125	0.126	0.0292	0.249	0.3	0.0293	0.0885	0.0568	0.045	0.0509	0.053	0	0	0.00542	0.0491	0.321	0.0176	0.549	0.132	0.681
TCGA-BH-A0HW-01	High	1.11404	2.11e-18	3.92e-19	2.48e-18	0.0111	0	0	2.44e-19	0.0412	3.8e-19	0	0.00608	0	7.26e-19	2.14e-17	8.9e-18	0.115	0.0327	8.17e-18	0.0116	0.0206	0.0322
TCGA-AN-A0FT-01	Low	1.03741	4.09e-19	1.46e-19	0	0.00951	0	3.64e-20	0.00758	0.128	0.0407	0.0189	0.0684	5.87e-19	9.98e-20	3.14e-18	0	0.112	0.0233	0	0.0392	0.133	0.172
TCGA-D8-A146-01	Low	1.03683	0.0442	0	0	0.00367	0.00724	0.0247	0.00775	0.0389	0.026	0	0.0579	0.00904	0	3.23e-19	0	0.024	0.0132	0	0.0831	0.109	0.193
TCGA-GM-A2DB-01	High	1.11405	0.138	0.00789	0	0.00894	0.0267	0.0998	0.0319	0.0256	0.0305	0.0252	0.0348	0.00247	2.39e-19	0.00195	9.6e-18	0.208	0.16	4.77e-19	0.154	0.0312	0.185
TCGA-D8-A27V-01	High	1.11415	0	0	0	5.2e-20	4.19e-18	0.0215	0.00332	0.0472	0.00357	6.81e-19	0.0183	2.47e-18	7.82e-20	0	1.78e-18	0.019	0.0264	0	0.0153	0.0916	0.107
TCGA-A2-A0T0-01	High	1.11586	0.0113	0.0116	1.51e-18	0.00564	0.000617	0.0183	0.0152	0.021	0.024	0.0238	0.028	0.0183	0	5.02e-18	3.48e-19	0.169	0.205	0	0.0506	0.0312	0.0818
TCGA-OL-A5RU-01	Low	1.03522	0.222	0.000187	0.0141	0.0135	0.127	0.165	0.0258	0.0371	0.0188	0.00638	0.0314	0.0205	1.04e-19	0	6.89e-19	0.0611	0.0138	1.26e-18	0.286	0.104	0.39
TCGA-E2-A10E-01	High	1.11609	2.98e-20	0.0051	0	2.39e-20	0	0.0104	0.00652	0.0164	0.0107	5.41e-19	0.0325	0	2.79e-18	0	0	0.0537	0.0523	0.00783	0.0182	0.0605	0.0787
TCGA-E2-A1IO-01	Low	1.03506	0.00547	0.00573	0.000171	0.00638	0.0655	0.119	0.00846	0.0405	0.0086	0.00171	0.0207	0.000148	1.61e-20	0	0	0.0327	0.0181	0.0078	0.0717	0.106	0.177
TCGA-A8-A07E-01	High	1.11706	0	1.06e-21	2.76e-19	0.0061	0.00867	0.0631	0.0308	0.192	0.0171	0.00747	0.0308	0.00612	7.69e-05	0	0	0.0101	0.174	0	0.0575	0.177	0.234
TCGA-E9-A248-01	High	1.11826	0.313	0.0819	0.0217	0.0223	0.139	0.266	0.0242	0	0.0824	0.0594	0.0459	0.0217	9.54e-20	0.017	0.0535	0.0567	0.359	3.86e-18	0.427	4.64e-18	0.427
TCGA-BH-A0W4-01	Low	1.03311	1.21e-18	0	0	0.00637	0	0.00203	1.69e-19	0.0438	2.79e-18	1.37e-18	0.0233	0	0	0	0	0.0426	0.0344	0	0.0141	0.135	0.149
TCGA-AR-A24R-01	High	1.11858	0.0286	0.0144	4.97e-19	0.0126	0.0271	0.06	0.0185	0.00173	0.0362	0.00787	0.0621	0.00603	9.88e-19	3.5e-18	0	0.0642	0.13	0.0136	0.0861	0.0552	0.141
TCGA-A1-A0SB-01	High	1.11859	0	1.01e-18	3.3e-18	0.00337	0	0	0	1.03e-18	0	1.26e-19	0.000247	0	6.19e-20	3.94e-19	0	0.0854	0	2.26e-19	0.00609	0.043	0.0491
TCGA-A2-A0ES-01	Low	1.03297	2.64e-19	0.00383	1.69e-19	0.00517	0	0.0378	0.0274	0.0811	0.0114	0.00835	0.0269	0.00579	0	0	0	0	0.0269	0.00181	0.0372	0.141	0.178
TCGA-BH-A0DS-01	Low	1.03161	0.0136	8.45e-21	0	0	0.000541	0.0575	0.0129	0.0664	0.0767	0.0298	0.101	0	0	4.55e-18	0	0.0552	0.0419	0	0.0743	0.16	0.235
TCGA-A2-A04V-01	High	1.12014	1.8e-19	0.00071	1.85e-18	0.0136	6.27e-19	0.00439	0.0147	0.0643	0.0195	0.00241	0.0393	0.00368	0	0	0	0.0996	0.0668	0	0.0409	0.114	0.155
TCGA-BH-A0DZ-01	High	1.12074	3.95e-20	0.005	7.62e-19	0.00353	4.28e-20	0.047	0.0096	0.0368	0.0455	0.0345	0.0327	0.0309	0.000533	0	0	0.0471	0.239	0	0.0596	0.043	0.103
TCGA-AO-A12B-01	Low	1.03112	0.0105	2.89e-19	0	0.00256	0	0.0274	1.01e-05	0.0299	0.018	0.00789	0.0179	1.6e-19	6.02e-19	1.2e-18	2.59e-18	0.0783	0.0891	2.97e-19	0.0302	0.0154	0.0456
TCGA-C8-A274-01	Low	1.03056	0.0185	0.0044	9.77e-20	0.000545	1.71e-20	0.00705	0	0.000247	0.0157	0	0.0236	0.00646	0	0	0	0.0738	0.0683	0.0302	0.0449	0.00259	0.0475
TCGA-A2-A25E-01	High	1.12169	0.0203	0.0222	0	0.0101	1.03e-19	0.0172	0.0089	0.0208	0.0235	0.00273	0.0443	0	0	1.45e-18	0	0.0242	0.276	6.27e-20	0.0459	0.0471	0.093
TCGA-A2-A1FX-01	Low	1.02942	0.0163	0.00356	0	0.00987	0.00361	0.0252	0.0018	0.0735	0.0318	0.00955	0.048	0.00966	0	5.43e-19	0	0.084	0.112	0	0.0627	0.0412	0.104
TCGA-AN-A0AM-01	Low	1.02915	0.0161	0	0	0.000984	1.06e-18	0.0296	0.00598	0.00237	0.0287	0.02	0.0333	1.72e-18	1.8e-19	4.59e-18	7.04e-18	0.126	0.233	2.76e-19	0.0379	0.0236	0.0615
TCGA-A2-A25D-01	High	1.12321	0.0887	0.0313	0.0292	0.0139	0.111	0.191	0.0196	0.147	0.0644	0.0414	0.0709	0.0183	7.24e-19	1.25e-19	1.07e-18	0.178	0.115	2.96e-19	0.216	0.0967	0.313
TCGA-A2-A0SY-01	Low	1.02874	0.0792	5.42e-20	0	0	0.000846	0.0689	0.0198	0.0704	0.0331	0.0041	0.0517	0.00764	0	0	8.98e-18	0.0339	0.0603	0	0.112	0.155	0.266
TCGA-A7-A2KD-01	Low	1.02859	0.0206	0.00955	0.00798	0.0117	0.0105	0.0453	0.0092	0.013	0.0484	0.0243	0.0295	0	8.58e-19	0	0	0.0239	0.184	0.0352	0.0719	0.0227	0.0946
TCGA-BH-A0HI-01	Low	1.02845	0	8.42e-19	3.93e-18	0	0	0.00436	3.47e-20	0.0862	0.0329	0.0136	0.0354	0	1.83e-19	7.05e-18	0	0.0468	0.0187	0.0052	0.0295	0.0515	0.081
TCGA-BH-A0E1-01	High	1.12409	6.72e-19	2.33e-18	0	1.61e-19	0	0	0	0.0588	0.0186	0.00682	0.0171	0	2e-19	5.62e-19	0	0.0872	0.13	0	0.0191	0.0387	0.0578
TCGA-B6-A0RU-01	High	1.12487	0	6.85e-20	0	0	0	1.43e-19	0.00213	0.0639	4.21e-18	0	0.0181	2.71e-18	0.00207	0	0	0.131	0.186	0	0.00343	0.0888	0.0922
TCGA-WT-AB44-01	Low	1.02771	5.03e-18	3.73e-19	1.86e-19	0.0113	4.9e-19	0.00466	0.00093	0.022	0.0242	0.0053	0.0536	0.00685	0	0	2.4e-17	0.0797	1.49e-18	4.42e-19	0.0242	0.105	0.13
TCGA-C8-A26W-01	Low	1.02711	0.0679	0.00488	2.29e-18	0.00826	0.0159	0.075	0.0048	0.0253	0.021	0.0113	0.0428	3.03e-18	0	0	0	0.074	0.241	9.08e-18	0.0861	0.054	0.14
TCGA-LL-A442-01	High	1.12559	0.0421	6.86e-20	1.83e-18	2.14e-19	0	8.76e-19	1.81e-19	0.0639	0.0674	0.0523	0.0304	0.021	0	2.63e-18	0	0.0524	0.0186	0.0139	0.11	0.0319	0.142
TCGA-D8-A1Y0-01	Low	1.02667	0.0188	0.0184	0	0.00784	0.0487	0.0758	0.0282	0.0653	0.0341	0.00818	0.0519	0.00928	4.25e-20	0	0.0134	0.00656	0.183	0.00962	0.108	0.0728	0.181
TCGA-E2-A15J-01	High	1.12696	0.00326	2.24e-19	2.6e-18	0	0	0	1.26e-20	0.00653	0.0158	0.00422	0.021	0	4.93e-20	2.09e-17	1.64e-17	0.0944	0.0363	0	0.0275	0.00327	0.0308
TCGA-B6-A0X4-01	High	1.12767	0.00563	5.04e-20	0	0	0	1.73e-17	6.77e-20	0	0.00547	0	0.0165	9.91e-18	0	1.67e-17	0	0.0762	0.0116	1.93e-18	0.0186	4.49e-19	0.0186
TCGA-B6-A0RI-01	High	1.12822	0	0	0	0.00416	7.33e-19	9.09e-19	0	0	0.0328	0.0122	0.0296	0.0125	0.00127	1.65e-18	0	0.0679	0.0903	0.00408	0.051	0.0224	0.0734
TCGA-D8-A1J8-01	High	1.12882	0.053	0.0546	0	0.000653	0.0427	0.166	0.0211	0.000998	0.0836	0.0512	0.0402	0.0143	5.37e-19	0.000985	0	0.022	0.43	0.00583	0.163	0.00932	0.172
TCGA-E2-A1IE-01	High	1.12937	0	0	2.4e-18	0	7.04e-18	0	0	0.0448	3.95e-19	3.97e-18	0.0117	0	0	3.91e-19	4.07e-18	0.0528	0.0798	0	0.00832	0.0411	0.0494
TCGA-EW-A1P1-01	High	1.13017	0	0	0	0.00773	0.0176	0.0586	0.0285	0.307	0.0482	0.0123	0.0901	1.27e-19	0.00334	3.07e-17	1.7e-18	6e-18	0.0786	0	0.0651	0.447	0.512
TCGA-GM-A2DL-01	Low	1.02541	0	0	0	4.17e-20	1.36e-18	0	0.0314	0.0449	0.0399	0.0171	0.0734	0.0195	0	1.69e-18	0	0.0716	0.138	0.00146	0.0637	0.179	0.243
TCGA-A8-A09B-01	Low	1.02376	1.74e-18	6.4e-19	5.43e-18	0.0006	0	1.43e-19	0	0.0276	0.00405	1.71e-18	0.0279	2e-18	0	0	4.36e-18	0.0925	0.000427	0	0.0105	0.11	0.121
TCGA-E2-A1LS-01	Low	1.02265	3.27e-18	1.19e-19	6.58e-18	0	7.54e-19	1.74e-18	0	0.0169	0	8.27e-18	0.0188	0	6.58e-22	5.73e-19	0	0.0193	0.0719	0	0.00819	0.00847	0.0167
TCGA-C8-A275-01	Low	1.02211	0.137	0.0326	0.00557	0.00147	0.0347	0.14	0.0404	0.0256	0.0795	0.0579	0.066	0.0116	5.64e-19	1.44e-18	0.0176	0.123	0.292	0	0.209	0.0128	0.222
TCGA-D8-A147-01	High	1.13055	0.0615	0.0174	0	0.00294	0.0336	0.0616	0.0178	2.69e-19	0.018	0.0192	0.0221	0.00959	1.42e-20	1.77e-18	0	0.0601	0.292	0	0.113	0.00452	0.117
TCGA-BH-A0BC-01	Low	1.02202	0.0146	0.0127	7.91e-05	3.87e-19	0.0159	0.0562	0.0086	0.157	0.0714	0.0412	0.0648	0.00233	2.38e-19	2.66e-18	4.38e-18	0.0842	0.112	0	0.0793	0.117	0.196
TCGA-E2-A1IF-01	Low	1.01967	8.53e-19	0	0	0	0	7.92e-19	0.00551	0.0973	0.00964	0	0.054	1.35e-17	0	2.72e-18	0	0.101	0.0302	1.2e-18	0.0101	0.177	0.188
TCGA-E2-A15O-01	High	1.13155	1.1e-19	8.47e-19	3.34e-19	5.94e-19	1.5e-18	9.51e-18	0.00569	0.00755	0.00679	0	0.0256	1.49e-17	2.08e-18	7.19e-19	2.14e-17	0.118	0.0902	0	0.0235	0.0099	0.0334
TCGA-A2-A0EX-01	High	1.13228	0.0121	3.9e-19	2e-18	0.0003	1.95e-18	0.0347	0.0083	0.055	0.00648	0	0.028	4.04e-19	0	4.95e-18	0	0.0534	0.0126	0	0.029	0.101	0.13
TCGA-BH-A18I-01	High	1.1323	0.0297	0.0201	0.00169	0.00528	0.0196	0.077	0.02	0.0226	0.0454	0.0084	0.0636	0	3.28e-20	0	0	0.0212	0.101	0.0131	0.0936	0.0676	0.161
TCGA-E2-A2P5-01	Low	1.01929	0	9.62e-20	0	0.000917	0	0.0189	0.00196	0.0641	0.00646	0.00327	0.025	0	4.36e-19	0	1.47e-17	0.184	0.114	0	0.0112	0.0968	0.108
TCGA-BH-A0HB-01	High	1.13276	1.53e-19	0.00049	1.21e-17	0.00609	0.00549	0.104	0.0538	0.0123	0.0544	0.0257	0.0595	0.0106	1.81e-19	0	1.31e-17	0.126	0.171	0	0.0881	0.071	0.159
TCGA-BH-A0E2-01	High	1.13282	0	1.83e-19	0	0.00703	0	0.0299	7.77e-20	0.0108	0.00797	0.00423	0.0182	1.22e-17	0	0	0	0.0558	0.156	8.66e-18	0.0195	0.0454	0.0649
TCGA-BH-A8FZ-01	Low	1.01827	0.0579	0.00281	0	0.0115	1.41e-21	0.0414	0.121	0.0613	0.0839	0.0488	0.0478	0.0729	0.00133	3.37e-19	0	0.0241	0.016	0	0.252	0.132	0.385
TCGA-AR-A1AL-01	Low	1.0182	3.2e-18	6.07e-20	0.00265	0.00497	2.29e-19	0.018	0.0139	0.142	5.98e-19	0	0.0176	1.5e-18	1.82e-20	2.12e-17	0	0.00198	0.0288	0.0165	0.0205	0.166	0.187
TCGA-AR-A24L-01	High	1.13389	0	0	1.52e-17	0.00455	8e-18	0.011	0	0.0556	0.013	1.14e-18	0.0322	0	1.85e-20	0	1.77e-18	9.06e-18	0.138	0	0.0178	0.0458	0.0636
TCGA-A8-A09M-01	Low	1.01756	0.0705	0.0152	0.00388	0.00745	0.0448	0.0979	0.0117	0.006	0.0722	0.0436	0.0547	0.01	0	0	0.00287	0.099	0.108	0.0151	0.163	0.0216	0.185
TCGA-BH-A0AY-01	Low	1.01754	0	1.31e-18	8.73e-18	0	1.89e-19	0.0413	0.023	0.132	0.054	0.0249	0.0914	0.00101	0.00241	6.37e-18	0	0.083	0.125	0	0.0726	0.228	0.3
TCGA-C8-A12Q-01	Low	1.01663	0.0261	7.35e-20	2.25e-19	0.000637	1.55e-19	0.011	0.0151	0.0459	0.0542	0.0323	0.0666	0.00463	0	0	1.55e-18	0.0186	0.103	1.12e-19	0.0782	0.0287	0.107
TCGA-EW-A1OW-01	Low	1.0155	2.8e-18	0.000537	4.73e-19	1.04e-20	1.11e-17	0.00534	0.00496	0.0443	0.0159	0.019	0.0184	2.94e-18	8.19e-20	4.23e-18	1.7e-18	0.0253	0.425	0	0.0139	0.0771	0.091
TCGA-AC-A7VB-01	Low	1.01532	1.13e-19	0	0	0.00208	0	8.66e-18	2.59e-19	0.0216	1.2e-18	0	0.016	0	0	1.62e-17	6.29e-18	0.173	0.0924	4.35e-18	0.00654	0.025	0.0316
TCGA-B6-A0IB-01	Low	1.01419	3.26e-18	1.76e-18	0	0	0	3.35e-18	0	0.0226	3.62e-18	2.99e-18	0.014	0	0	5.54e-19	3.3e-17	0.153	0.0194	0	0.00207	0.0769	0.0789
TCGA-LL-A9Q3-01	High	1.13524	0.0053	0	6.99e-18	1.73e-19	2.08e-20	0.029	0.0158	0.0218	0.0499	0.0369	0.064	0	2.78e-19	1.08e-19	0	0.155	0.00932	0	0.0628	0.0358	0.0985
TCGA-BH-A0HY-01	High	1.13553	4.06e-18	8.89e-19	3.78e-18	1.48e-18	0	9.02e-18	0	0.0509	7.08e-19	2.39e-18	0.019	0	0	0	3.8e-17	0.0892	0.121	8.05e-20	0.00912	0.0679	0.0771
TCGA-GM-A2DK-01	Low	1.01341	4.44e-19	2.82e-21	0	0	0	0.0259	0.0421	0.175	0.0463	0.0139	0.0876	0.00939	0.0021	0	0	0.0242	0.0969	1.5e-18	0.0682	0.27	0.338
TCGA-A8-A08R-01	High	1.13688	0.095	0.0211	5.88e-20	0	0.0167	0.0586	0.0197	0.0217	0.0858	0.0763	0.0358	0.00781	8.43e-19	0	0.0104	0.0956	0.223	0.0495	0.16	0.0109	0.171
TCGA-B6-A0IN-01	Low	1.01333	0.109	0	0.00152	0	0	0.0307	0.0333	0.208	0.0655	0.0294	0.0934	0	0	1.51e-18	0	0.126	0.0576	0	0.143	0.217	0.36
TCGA-B6-A0I1-01	High	1.137	1.11e-19	3.87e-18	0	0	0	0	0	0	0	0	0.018	0	0	1.37e-17	1.95e-17	0.138	0.178	1.12e-17	0.00436	0.000496	0.00485
TCGA-C8-A1HN-01	High	1.13816	0.0099	0.0175	1.26e-19	0.00194	0.013	0.0291	0.000633	0.0155	0.0468	0.0136	0.0379	0.0158	5.11e-20	5.04e-19	0	0.0341	0.241	0	0.0657	0.0164	0.0821
TCGA-AR-A24P-01	High	1.13913	0	0.00392	3.19e-19	0.00745	7.29e-21	0.0231	0.0027	0.0217	0.018	0.0014	0.0304	0.00199	0	0	0	0.0318	0.0954	0.0139	0.0219	0.0562	0.078
TCGA-AN-A0XV-01	High	1.13967	1.73e-18	0.0178	0	0.00161	0.0241	0.0731	0.0191	0.11	0.00864	0	0.0219	7.8e-18	2.27e-19	1.79e-18	2.05e-17	0.0433	0.105	6.52e-19	0.0468	0.151	0.198
TCGA-GM-A3NW-01	Low	1.00844	0	5.63e-19	1.65e-17	0	0	0.0115	0.00493	0.0429	7.97e-05	0	0.0369	2.44e-17	0	4.05e-19	9.33e-18	0.0902	0.0144	0	0.0167	0.064	0.0807
TCGA-E2-A158-01	High	1.14087	0.0131	0	0	4.68e-19	0.0311	1.73e-19	1.31e-20	0	7.16e-19	0	0.0108	0	0	0	2.66e-17	0.0976	0.117	0.00621	0.0371	0	0.0371
TCGA-E2-A15H-01	High	1.14105	0.00227	4.58e-20	0	0.00351	2.27e-18	2.26e-23	0.000711	0.0107	0.0106	0.00232	0.0215	0	0	7.57e-18	1.44e-17	0.159	0.0592	0	0.016	0.0174	0.0334
TCGA-AN-A041-01	High	1.14112	2.67e-20	0.00555	0.0038	0.00648	0.00927	0.0156	0.00164	0.0832	0.0147	0.0018	0.0233	0.00435	3.36e-19	0	0	0.0421	0.0516	0	0.0309	0.0419	0.0728
TCGA-AR-A24Z-01	High	1.1419	0.0105	0.0124	0	0.0314	0.0103	0.0116	0.000239	0.00386	0.039	0.015	0.0451	0.0118	0	5.08e-19	0.000396	0.0418	0.166	0	0.0583	0.0112	0.0695
TCGA-LL-A5YL-01	High	1.14303	0.0817	0	5.94e-18	0.000447	0	0.0473	0.0114	0.0365	0.0243	0.0141	0.0475	0	0	0	3.15e-18	0.141	0.104	8.73e-18	0.0796	0.064	0.144
TCGA-BH-A0AV-01	High	1.14367	7.85e-20	0.00302	0	0.00669	0	0.0108	2.57e-19	0.044	0.0366	0.0167	0.0255	0.032	0.000188	0	1.05e-17	0.0282	0.292	0	0.0482	0.107	0.155
TCGA-A2-A04R-01	High	1.14405	2.31e-18	0	7.73e-18	0.00632	0	1.31e-18	3.05e-19	0.0286	0.00125	2.16e-19	0.0133	0	1.43e-20	2.03e-18	0	0.117	0.114	6.42e-18	0.0155	0.0593	0.0748
TCGA-LL-A73Y-01	High	1.14435	0.0239	0.00828	0.0171	0.00819	0.0647	0.0683	0.113	0.071	0.0223	0.0127	0.0118	5.45e-20	0	2.88e-18	0	0.0346	0.0671	0.0295	0.152	0.0862	0.238
TCGA-E2-A15K-06	High	1.14465	0.0105	1.98e-18	0	6.88e-19	4.9e-18	0	0	0.0119	0.0273	0.00678	0.0279	0	1.22e-19	1.65e-19	1.18e-17	0.123	0.0103	0	0.0509	0.00593	0.0569
TCGA-A2-A04U-01	High	1.14529	8.95e-19	5.43e-19	0	0	7.46e-19	0	0	0.0275	0	0	0.0256	0	0	0	1.18e-18	0.154	0.255	0	0.00125	0.0459	0.0471
TCGA-BH-A203-01	High	1.14564	0.0207	0.0295	0	0.00771	0.0307	0.06	0.0254	0.0227	0.0276	0.0102	0.0401	0.0181	4.88e-21	3.32e-18	0	0.0379	0.339	0.00699	0.0864	0.0491	0.135
TCGA-AR-A2LH-01	High	1.14582	0.0995	0.00248	0.0228	1.1e-22	0.0467	0.136	0.0355	0.137	0.0261	0.0252	0.0397	0.0437	0	0	0	0.089	0.0997	0	0.17	0.13	0.3
TCGA-AO-A03V-01	High	1.14626	0	0	2.03e-18	0.0107	0.0271	0.0283	0.00282	0.0598	1.97e-19	0	0.0257	0	1.99e-19	0	0	0.0155	0.0376	0.00603	0.0362	0.0858	0.122
TCGA-A8-A07R-01	High	1.14793	6.97e-20	0	5.48e-18	0	9.53e-19	0	0	2.58e-19	0.0125	0.0223	0.00811	0	0	0	2.75e-18	0.197	0.161	2e-17	0.0125	0.00309	0.0156
TCGA-A2-A0T7-01	High	1.14824	5.31e-21	0	0	0.0103	0	0	0.00803	0.0132	0.0391	0.0178	0.0489	0	3.18e-20	4.82e-19	0	0.0363	0.027	0	0.0455	0.0479	0.0933
TCGA-B6-A0IM-01	High	1.14833	6.53e-19	0.00472	0	0.00396	1.13e-20	2.33e-18	0	0.0392	0.021	0.00557	0.0286	0	4.61e-19	0	7.78e-19	0.0283	0.0879	0	0.0165	0.0623	0.0788
TCGA-AC-A2BM-01	High	1.14844	0.0443	0.0213	0.00276	0.0115	0.0445	0.0687	0.00743	0.00686	0.029	0.0133	0.0373	0	0	0	0	0.0117	0.156	0.0307	0.115	0.0189	0.134
TCGA-BH-A0HF-01	High	1.14867	0	0	7.84e-18	0	0	0.00497	0.00862	0.108	0.0675	0.0245	0.0786	0.00388	0.002	1.38e-17	0	0.0223	0.108	0	0.0547	0.16	0.214
TCGA-AR-A24W-01	High	1.14881	0	0	0	0.00691	7.42e-19	0.00243	0	0.0452	0	6.23e-18	0.00761	5.47e-18	0.000688	2.12e-17	1.05e-17	0	0.0137	0	0.00996	0.184	0.194
TCGA-BH-A202-01	High	1.14906	0.00241	0.0165	0	0	0.00832	0.0405	0.0111	0.0223	0.05	0.0146	0.0755	0.00424	0	2.3e-18	4.3e-18	0.0368	0.26	1.63e-18	0.0604	0.0125	0.0729
TCGA-OL-A66N-01	High	1.1494	0.0196	6.13e-19	1e-19	0.00041	0.00424	0.0544	0.0158	0.112	0.00941	0.00169	0.041	0	0	9e-19	0	0.116	1.23e-17	0	0.0385	0.141	0.18
TCGA-C8-A1HE-01	High	1.14965	0.00897	0.00286	1.18e-19	0.00199	0	0.00603	0.00204	0.021	0.0211	0	0.036	2.68e-18	1.7e-18	1.45e-18	0	0.0503	0.0165	0.00776	0.0336	0.0111	0.0448
TCGA-A8-A085-01	High	1.15043	0	0	0	0	0	0	6.98e-19	0.0795	0.00139	0	0.0207	9.38e-18	0	6.02e-18	3.1e-18	0.108	0.0681	1.33e-17	0.00844	0.0398	0.0482
TCGA-AR-A5QN-01	High	1.15081	0	5.38e-19	0	0.00104	8.69e-19	0.0147	0.00995	0.0662	7.08e-20	0	0.0376	0	1.4e-19	2.74e-18	9.17e-18	0.034	0.0652	1.37e-18	0.0115	0.208	0.219
TCGA-E2-A570-01	Low	1.00827	3.27e-18	0	3.6e-18	0	9.86e-19	7.92e-19	0	0.0255	0.00138	0.00212	0.0109	0	1.25e-19	0	4.24e-18	0.0717	0.0432	4.61e-19	0.00579	0.108	0.114
TCGA-D8-A1XW-01	High	1.15107	0.0386	0.018	0.0121	0	0.0215	0.024	0.00153	0.0822	0.108	0.0594	0.0751	0.0301	2.46e-20	3.41e-18	2.33e-18	3.56e-18	0.102	0.0158	0.148	0.0411	0.189
TCGA-B6-A0IC-01	Low	1.00703	2.92e-19	0	0	0	5.02e-18	3.14e-18	1.71e-18	1.8e-19	0.014	0	0.0143	6.17e-18	0	4.56e-17	0	0.0947	0.0164	1.04e-18	0.0246	8.99e-20	0.0246
TCGA-D8-A1JL-01	High	1.15114	0.0242	0.0247	1.31e-19	0.00746	0.0308	0.107	0.0186	0.0215	0.0895	0.0596	0.0668	0.0095	0	0	0	0.0825	0.316	0.0224	0.134	0.0171	0.151
TCGA-A7-A0CH-01	High	1.15162	0	0	0	0	0	0.00841	0	0.00463	0.0145	0.00217	0.02	0	0	0	3.6e-18	0.0294	0.0394	0	0.0229	0.0229	0.0457
TCGA-B6-A1KF-01	High	1.15334	0	0	1.36e-18	0	0	0	0	0.0572	0	0	0.00965	3.9e-18	0	0	0	0.102	0.174	1.21e-17	0.00538	0.0286	0.034
TCGA-AR-A2LN-01	High	1.15372	0	7.35e-19	0	0.00135	1e-19	0.0233	0.00447	0.148	0.00286	0	0.0412	0	0.00266	0	2.3e-18	3.38e-20	0	0	0.0221	0.306	0.328
TCGA-A8-A09W-01	Low	1.00606	0	0.0105	1.54e-18	0.00274	1.95e-18	0.0452	0.00283	0.0671	0.0486	0.0131	0.0669	0.0182	0.00196	9.4e-20	8.82e-19	0.069	0.273	0	0.0623	0.0621	0.124
TCGA-B6-A409-01	High	1.15567	0	1.9e-18	0	0	0	0	0.00517	0.0404	0.0212	0.0237	0.0421	2.17e-18	0	8e-20	1.81e-17	0.104	0.201	2.21e-17	0.0212	0.0607	0.0819
TCGA-AO-A0JI-01	Low	1.00493	0.0329	0	1e-18	0.00205	0	0.0123	0	0.018	6.84e-19	0	0.0148	0	0	3.79e-19	0	0.0844	0.0781	0	0.086	0.00991	0.0959
TCGA-BH-A1FR-01	High	1.15624	0.0337	0.00894	0	0.00172	0.00706	0.0384	0.0031	0.0635	0.0427	0.0183	0.0382	0	0	7.96e-18	0	0.0797	0.0625	0	0.0695	0.0317	0.101
TCGA-E9-A54X-01	High	1.15703	0.00254	0.000685	9.93e-19	0.000931	5.37e-20	0	0	0	0.00689	0	0.0129	4.84e-18	0	0	1.73e-17	0.109	0.0634	6.75e-19	0.0152	0	0.0152
TCGA-D8-A142-01	Low	1.00478	0.0385	0.00253	0.00196	0.000737	0.0181	0.0256	0.00582	0.0591	0.0475	0.0284	0.0476	0.0177	0	2.91e-19	1.59e-19	0.0311	0.246	0	0.0901	0.0717	0.162
TCGA-A2-A0T5-01	High	1.15717	2.49e-19	0	1.13e-17	0	0	0.00454	0.00236	0.0323	1.52e-19	0.000166	0.016	0	0	0	1.73e-17	0.0898	0.0538	0	0.00807	0.0315	0.0396
TCGA-E9-A1N4-01	High	1.15836	0.0424	0.0201	0	0.0034	0.0223	0.0429	0.0088	0.0607	0.111	0.0473	0.0689	0.0209	0	8.74e-19	0	0.0398	0.0922	4.22e-19	0.166	0.0704	0.237
TCGA-A2-A0EY-01	High	1.15843	0.019	0.00123	0.00774	0	0	0.0254	0.0155	0.0227	0.0333	0.0201	0.0388	0.00971	4.22e-19	0	7.86e-19	0.0649	0.0932	5.88e-19	0.0609	0.0238	0.0847
TCGA-EW-A2FW-01	High	1.16072	0	2.83e-19	0	0.00352	0	0	3.72e-20	0.0679	0.00703	0.00208	0.0288	0	0	1.61e-19	0	0.191	0.134	3.87e-19	0.0147	0.0362	0.0509
TCGA-C8-A132-01	High	1.1608	0.0744	0.0291	0.00608	0.00841	0.103	0.167	0.0372	0.0472	0.0166	0.00717	0.0248	0.0164	5.74e-19	1.17e-18	0.00547	0.0198	0.134	0.00145	0.173	0.0605	0.234
TCGA-BH-A18U-01	High	1.16088	0.0067	0	0	1.48e-18	0	0	0.00517	0.0154	0.0386	0.0257	0.0462	6.04e-18	2.14e-19	1.32e-18	0	0.0929	0.197	0	0.0423	0.0201	0.0624
TCGA-5L-AAT1-01	High	1.16089	0.07	0	0.0352	0.0173	0.112	0.191	0.0189	0.0543	0.0626	0.0294	0.0685	0	0	7.07e-19	1.09e-17	0.133	0.0392	0.01	0.189	0.0695	0.258
TCGA-E2-A106-01	Low	1.00469	1.49e-19	2.01e-18	8.9e-18	3.93e-21	0	0	9.37e-20	0.0382	0.0112	0.000795	0.0216	0	0	2.09e-18	8.02e-19	0.0643	0.00955	1.99e-18	0.0171	0.0309	0.048
TCGA-BH-A0AZ-01	High	1.16126	0	0	9.05e-19	0.00846	0.00406	0.0254	0	0.119	0.0135	5.1e-18	0.0482	4.32e-19	7.91e-20	6.59e-18	0	0.0334	0.0375	8.48e-18	0.0188	0.208	0.227
TCGA-BH-A0H0-01	High	1.16191	0.00241	0.00402	0	0.00435	0	0.0174	0.00186	0.0276	0.0129	0	0.0374	4.74e-18	9.24e-19	9.52e-18	2.94e-20	0.0586	0.189	6.01e-19	0.0427	0.0433	0.086
TCGA-EW-A1PA-01	High	1.16277	0.0118	0.00421	1.17e-19	0.0127	0.0163	0.0521	0.00674	0.0739	0.0137	0	0.0292	0	0.00182	0	9.01e-18	0.0361	0.118	0	0.0534	0.055	0.108
TCGA-A8-A093-01	High	1.163	4.27e-19	0	1.84e-18	0.00215	1.23e-18	0	4.75e-19	0.0219	0.00336	0	0.0263	8.62e-21	0	8.35e-18	0	0.083	0.0178	5.68e-18	0.0116	0.0681	0.0796
TCGA-A2-A0EO-01	High	1.16315	0	0	0	0.00412	1.53e-20	0.0406	0.0115	0.0655	0.0232	0.00453	0.0371	0	0	8.05e-18	0	0.0278	0.0497	1.32e-20	0.0306	0.11	0.141
TCGA-A2-A1FW-01	High	1.16448	0.01	0.0151	0	0.0144	0.0103	0.0214	0.000262	0.00311	0.0162	0.000383	0.0292	3.35e-19	5.36e-20	0	0.00165	0.051	0.124	0.0188	0.0436	0.0372	0.0808
TCGA-E2-A15F-01	Low	1.00285	0.0498	0	0	0.00129	1.88e-18	7.39e-21	0.007	0.0108	0.00736	0	0.0426	7.55e-18	0.0013	4.3e-18	5.36e-18	0.0299	0.0936	2.64e-18	0.0611	0.0395	0.101
TCGA-BH-A0DX-01	High	1.16528	0	0	0	0	0	0.0177	0.0249	0.0906	0.133	0.0385	0.175	0.0051	0.000308	3.92e-18	0	0.0455	0.0605	1.64e-18	0.126	0.165	0.291
TCGA-A8-A0A1-01	Low	1.00185	0.0238	0.0156	0.00114	3.06e-20	0.00439	0.061	0.0205	0.0158	0.129	0.0509	0.105	0.0201	4.15e-20	0	1.2e-18	0.0138	0.0816	0.0331	0.15	0.134	0.285
TCGA-A2-A0T6-01	High	1.16627	0.0566	0.0123	0.00811	0.0092	0.0372	0.0956	0.0173	0.0408	0.0293	0	0.0632	0.0342	0	1.15e-18	5.86e-19	0.0142	0.0226	0.0196	0.169	0.224	0.394
TCGA-EW-A6SA-01	High	1.16754	0.00233	0	0	0.0226	0.00493	3.14e-19	3.89e-19	0.0412	2.46e-20	1.1e-19	0.01	0	7.01e-20	0	0	0.14	0.142	6.91e-19	0.0214	0.0212	0.0426
TCGA-E2-A15I-01	Low	1.00169	0.054	0.016	0	0.0146	0.0607	0.135	0.0103	0.0111	0.0127	6.01e-21	0.0302	0	0	2.11e-18	4.59e-18	0.015	0.0434	0.0213	0.111	0.0441	0.155
TCGA-D8-A27M-01	Low	1.00117	0.323	0.0341	0.0376	1.44e-21	0.0582	0.139	0.0246	0.00467	0.0555	0.0317	0.0557	0.0395	7.84e-19	2.92e-19	7.44e-19	0	0.257	0.00108	0.339	0.0598	0.399
TCGA-4H-AAAK-01	Low	0.999545	5.86e-18	9.89e-19	0	0.00736	3.42e-19	0.00364	0.00101	0.00968	0.0152	0.00231	0.0305	1.7e-18	1.34e-19	5.29e-19	1.08e-17	0.0787	0.0182	0.00168	0.0271	0.0775	0.105
TCGA-A8-A09V-01	High	1.17234	1.98e-19	0	0	0.00923	0	0.00224	0	0.00174	0	4.76e-19	0.00822	8.21e-19	0	7.95e-18	0	0.0184	0.0343	0	0.0188	0.0363	0.0551
TCGA-EW-A1J2-01	Low	0.998568	0	4.97e-21	0	0.00383	0	0.0343	0.0145	0.049	0.0461	0.0133	0.0745	5.54e-19	0	5.79e-19	2.67e-18	0.0019	0.0207	0.00912	0.0511	0.116	0.167
TCGA-A7-A26G-01	Low	0.998086	0.0722	0.0322	0.00116	0.00244	0.0312	0.0681	0.0189	0.0388	0.0509	0.0244	0.0558	0.0115	0.000228	3.17e-18	3.34e-19	9.68e-20	0.288	0.0189	0.143	0.117	0.259
TCGA-3C-AAAU-01	High	1.17403	0.00199	2.01e-19	1.1e-18	5.37e-19	0	0	2.05e-20	0.0175	0.00757	0.00499	0.0186	0	0	0	9.32e-18	0.0678	0.0468	6.19e-18	0.0153	0.0108	0.0261
TCGA-AC-A6IX-01	High	1.17501	6.06e-19	0	0	3.46e-19	1.73e-19	0.0351	0.00576	0.104	0.00603	0	0.0524	6.83e-18	6.96e-20	6.32e-18	0	0.0355	0.0299	1.99e-19	0.0151	0.281	0.296
TCGA-AN-A0FX-01	Low	0.997904	8.14e-19	7.24e-20	0	0.00235	4.64e-19	0.00111	0.000552	0.0315	9.57e-20	1.14e-17	0.00921	3.28e-18	0	2.83e-19	7.61e-19	0.0828	0.157	0	0.00481	0.0398	0.0446
TCGA-E2-A15A-01	Low	0.99728	0.0301	0.011	2.54e-19	0.00214	0.029	0.0565	0.00986	0.0196	0.0518	0.0289	0.0499	0	2.17e-19	0	0.00624	0.0522	0.195	1.37e-18	0.0905	0.0273	0.118
TCGA-BH-A0W3-01	Low	0.9967	0.0143	0	3.63e-18	4.1e-20	0	2.74e-18	2.22e-19	0.000177	0.0283	0.00769	0.0303	1.2e-17	0	2.13e-19	0	0.107	0.0468	0	0.0391	8.83e-05	0.0392
TCGA-BH-A0C3-01	High	1.17529	1.1e-17	0.0036	0.00463	0.00281	0.00998	0.0574	0.0142	0.165	0.017	3.06e-18	0.0565	2.41e-19	0	6.72e-18	0	0.0283	0.119	5.04e-19	0.0308	0.359	0.39
TCGA-UL-AAZ6-01	High	1.1774	0.0135	7.57e-19	0	0.00437	0	0	0.00302	0.0252	0.0157	0.0182	0.0173	1.89e-18	0	0	2.2e-18	0.128	0.0538	1.06e-20	0.0271	0.0235	0.0506
TCGA-A8-A08A-01	Low	0.995595	0.0171	0	9.29e-19	0	0	0.0234	0.0048	0.0173	0.0493	0.0176	0.0482	0.02	5.28e-19	0	0	0.0786	0.0253	0	0.0684	0.0345	0.103
TCGA-C8-A278-01	Low	0.992885	0.175	0.0259	0	0.00721	0.0228	0.0898	0.0461	0.0371	0.111	0.0755	0.0733	0.0213	0	2.8e-18	7.24e-18	0.126	0.24	0.0104	0.27	0.0258	0.296
TCGA-LD-A74U-01	High	1.17761	0	0	0	7.59e-20	0	0	0.00564	0.145	0.0523	0.0267	0.0765	0.0033	0.000567	1.19e-17	0	0.0548	7.65e-19	2.1e-18	0.0558	0.18	0.236
TCGA-AO-A124-01	High	1.17779	0.00996	0.00303	2.09e-17	0.00206	0.0188	0.0254	0	0	0.000403	0.00304	0.007	4.54e-18	0.000119	0	0	0.105	0.244	4.33e-19	0.0214	3.39e-19	0.0214
TCGA-C8-A8HQ-01	High	1.17789	0.0357	3.89e-19	1.12e-19	0.00255	0.00242	0.0356	0.00469	0.0281	0.0629	0.034	0.0418	0	0	7.63e-18	8.85e-19	0.11	0.176	5.16e-18	0.0746	0.0551	0.13
TCGA-A8-A095-01	High	1.17795	0.00534	0.00555	1.41e-19	1.13e-19	0	0.0198	0.00585	0.0376	0.014	0	0.0362	0	0	4.15e-18	0	0.0573	0.124	2.28e-18	0.0289	0.0552	0.0841
TCGA-E9-A228-01	High	1.17802	0.0164	0.00887	6.41e-19	0.00252	3.87e-20	0.00647	0	0.0365	0.0483	0.0142	0.0628	0.0122	4.62e-20	0	0	0.139	0.181	0	0.0613	0.0183	0.0796
TCGA-A1-A0SQ-01	Low	0.991057	6.09e-24	0	2.4e-18	0	1.11e-18	0.00946	0.000869	0.0587	0.0272	0.0115	0.0334	5.86e-18	0	6.35e-18	3.83e-18	0.0606	0.03	0	0.0335	0.0293	0.0628
TCGA-D8-A27E-01	High	1.18001	0.00946	0.0114	0	0.00541	0.0259	0.0397	0.00197	0.0262	0.0592	0.0198	0.0346	0.00983	0	1.11e-18	0	0.059	0.00842	0.0132	0.0944	0.0185	0.113
TCGA-A2-A0EM-01	Low	0.990734	3.22e-18	0	8.58e-18	0	1.14e-19	0.0126	0.00563	0.0336	0.0162	0.00271	0.0224	0	0.000489	2.98e-18	6.02e-18	0.0408	0.0493	0	0.0219	0.0502	0.0721
TCGA-A8-A06T-01	High	1.1807	0.0246	0.00841	1.09e-18	0.0173	0.0448	0.0466	0.00758	0.00894	0.0233	0.0123	0.0287	0	0	0	0	0.0962	0.0884	0.0119	0.081	0.0285	0.11
TCGA-AO-A0JF-01	High	1.18121	0	0.0017	0	0	0	0.0599	0.0167	0.188	0.0358	0.00252	0.0703	0	0.00127	2.46e-18	0	0	0.0591	0	0.0472	0.303	0.35
TCGA-E9-A243-01	Low	0.990418	0.284	0.0868	0.0281	0.0201	0.208	0.318	0.0404	0.00302	0.131	0.0751	0.0759	0.0728	0	0.00666	0	0	0.6	3.61e-18	0.519	0.00339	0.522
TCGA-A1-A0SG-01	Low	0.989504	0.155	0	4.69e-19	6.91e-22	0	0.0221	0.0108	0.0267	0.0179	0.00329	0.0393	0	0	1.29e-19	0	0.0756	0.0101	3.67e-18	0.143	0.0526	0.196
TCGA-C8-A12L-01	Low	0.988681	0.0134	0	0	0	4.73e-18	6.53e-19	0.00948	0.00444	0.0129	0.0137	0.0261	0.00112	0	0	0	0.0548	0.217	6.81e-18	0.0334	0.00222	0.0356
TCGA-AR-A24U-01	Low	0.988201	0.152	0.048	0.00373	0.00263	0.0371	0.117	0.0551	0.0196	0.0869	0.0388	0.101	0.0466	3.85e-19	0	3.81e-23	2.46e-20	0.258	0.0384	0.283	0.171	0.455
TCGA-A8-A09I-01	Low	0.987986	0.0381	0.00278	0	0.000205	7.02e-19	0.0152	0.0238	0.0019	0.0586	0.0468	0.0455	0.00495	0	3.1e-18	4.43e-18	0.132	0.254	0	0.0878	0.00095	0.0888
TCGA-B6-A0X5-01	High	1.18144	0	0.00291	0	1.57e-19	0	1.85e-18	0	1.05e-19	0.00712	0	0.0327	0	0	1.2e-18	3.31e-19	0.0888	0.183	1.04e-18	0.0136	5.26e-20	0.0136
TCGA-HN-A2NL-01	Low	0.987505	0.0441	0	0	0.0178	0.0586	0.0667	0.019	0.00237	0.00606	0.00984	0.0214	2.57e-17	0	0	2.43e-19	0.251	0.31	0	0.0891	0.00119	0.0903
TCGA-OL-A5RZ-01	High	1.18179	8.24e-19	0	8.92e-18	0	1.33e-18	0	0	0.0244	0	0	0.0274	2.04e-17	0	2.98e-19	4.94e-18	0.174	0.12	0	0.00477	0.0428	0.0476
TCGA-PL-A8LX-01	Low	0.987132	0.00362	0	0	0	1.26e-18	0	0	0.103	0.0388	0.0241	0.0362	7.72e-19	6.18e-20	1.22e-20	5.57e-18	0.0863	0.0106	0	0.0342	0.0513	0.0856
TCGA-AR-A0TW-01	High	1.18265	0.0881	0.0231	0	0.00563	0.111	0.161	0.0192	0.00376	0.0563	0.0451	0.0391	0.0171	1.96e-19	2.72e-19	7.2e-18	0.117	0.169	0.00999	0.209	0.00188	0.211
TCGA-C8-A1HF-01	Low	0.986805	0.0699	0.0256	9.38e-19	0.0135	0.048	0.128	0.0182	0.0238	0.0614	0.0447	0.0464	0	1.66e-18	4.3e-19	0	0.191	0.366	6.57e-19	0.134	0.0244	0.159
TCGA-A2-A0EU-01	High	1.18442	0	2.06e-20	4.75e-18	0.00549	0	0.000292	0.0018	0.0246	0.00968	0.00216	0.0224	0	0	1.17e-18	1.1e-17	0.022	0.116	0	0.0201	0.0622	0.0823
TCGA-AC-A8OR-01	Low	0.986712	0.00512	2.16e-19	0	0.000826	9.33e-19	0.0103	0	0.00758	0.0429	0.021	0.0304	0.0117	0	1.59e-17	0	0.114	0	8.58e-19	0.0488	0.00379	0.0526
TCGA-BH-A0BV-01	Low	0.986366	0.0302	0.00617	7.1e-19	0.000537	0.0352	0.0668	0.00393	0.0371	0.046	0.0191	0.0471	0.00126	2.25e-19	3.56e-20	1.06e-19	0.0704	0.0392	1.32e-20	0.0911	0.0409	0.132
TCGA-XX-A899-01	Low	0.984257	0.17	0.00494	0.028	0.004	0.0463	0.0972	0.027	0.109	0.0196	0	0.0598	0.0312	0	0	1.12e-18	0.0314	0.0298	0	0.217	0.29	0.507
TCGA-E2-A1AZ-01	Low	0.983718	0.0376	0.0578	0.0139	0.0197	0.0605	0.107	0.0229	0.0549	0.0246	0.0178	0.0344	0.0225	0	0	0	0.0325	0.575	0.000711	0.141	0.043	0.184
TCGA-E2-A1IH-01	Low	0.983663	0.102	0.0365	2.93e-21	0.0153	0.124	0.222	0.0375	0.0866	0.0726	0.0247	0.0646	0.00822	0	2.15e-18	7.41e-18	4.92e-18	0.227	0	0.238	0.193	0.432
TCGA-C8-A131-01	Low	0.981837	3.98e-20	0.00327	0	0.00136	1.55e-19	0.0114	0.0205	0.0495	0.021	0.0102	0.028	0.0472	0.00108	0	3.05e-19	0.106	0.188	0	0.063	0.077	0.14
TCGA-E2-A572-01	Low	0.981407	0	4.75e-18	0	0.0189	0.00157	6.09e-20	1.79e-19	0.0338	0.0347	0.0102	0.0787	0	2.18e-18	0	3.98e-17	0.164	0	6.46e-18	0.0257	0.0496	0.0753
TCGA-AO-A12H-01	Low	0.980815	0.00372	0.00308	0	0.00648	0	0.00702	6.54e-19	0.0574	0.0417	0.0176	0.0279	0.0103	4.45e-19	3.2e-19	0	0.0915	0.028	1.44e-19	0.0587	0.0401	0.0988
TCGA-E2-A15C-01	Low	0.980676	0.0623	0	1e-18	0.0069	0	0.0272	0.00112	0.0174	0.00759	0	0.0287	2.98e-18	1.48e-19	2.61e-18	5.75e-19	0.0351	0.0115	0.00292	0.0622	0.0373	0.0995
TCGA-B6-A400-01	High	1.18567	0.00213	9.52e-20	3.72e-19	0	2.83e-19	0	0.17	0.00244	0.016	0.00995	0.029	0.0189	8.38e-19	3.04e-18	0	0.0812	0.299	0	0.138	0.00228	0.14
TCGA-AC-A2FE-01	Low	0.980101	0	0.00102	0.0409	0.0125	0.107	0.189	0.043	0.0796	0.0496	0.0289	0.0652	0.0102	9.76e-19	7.43e-18	0	0.0572	0.0704	0	0.146	0.182	0.327
TCGA-AQ-A1H2-01	Low	0.979742	0.00177	0	0	0.00597	5.01e-19	0.00386	0	0	0.0515	0.0221	0.0321	0	0	0	3.96e-18	0.0847	9.8e-19	0.00931	0.0457	0.0218	0.0675
TCGA-AQ-A04J-01	Low	0.979456	0.29	0.0312	0.0352	0	0.0628	0.122	0.0247	0.127	0.0164	0.0162	0.0182	2.96e-18	0	0	1.04e-17	0.00922	0.286	2.2e-18	0.267	0.101	0.368
TCGA-E9-A1RF-01	Low	0.976266	0.0316	0.00713	0	0.0132	0.057	0.111	0.033	0.0394	0.0631	0.0318	0.0639	0.0147	6.52e-19	0	0	0.152	0.0932	4.8e-20	0.138	0.0285	0.167
TCGA-AR-A1AY-01	High	1.18668	0	0.00112	1.95e-18	0.00447	5.72e-19	0.000908	0.00106	0.00592	0.00699	0.00918	0.00913	0	0.00209	0	1.09e-18	0.0465	0.399	4.16e-19	0.0118	0.0143	0.0261
TCGA-A1-A0SM-01	High	1.18751	0	0	0	1.18e-20	2.52e-18	0	0	0.0293	0.0373	0.00791	0.0354	0.00172	0	9.41e-18	0	0.0422	0.0791	0.00327	0.0359	0.0483	0.0842
TCGA-A1-A0SD-01	High	1.18812	0	0	5.2e-19	0.00549	0	0.00177	0.00541	0.0857	0.0109	0.000704	0.0345	7.49e-18	1.07e-19	2.94e-18	7.44e-19	0.039	0.0273	2.06e-19	0.015	0.092	0.107
TCGA-D8-A27I-01	High	1.18864	7.58e-19	0	0.015	1.03e-21	0.00778	0.056	0.0181	0.129	0.0297	0	0.0691	0	0.00101	1.23e-17	7.32e-18	0.00531	0.0495	2.36e-18	0.0467	0.276	0.323
TCGA-A2-A0SU-01	High	1.1902	5.73e-19	0.00709	3.23e-18	0	0.00143	0.0591	0.0165	0.104	0.00529	1.57e-18	0.0203	3.46e-18	5.91e-21	0	1.08e-17	0.0613	0.115	0	0.0192	0.101	0.12
TCGA-AR-A0U3-01	Low	0.975958	0.0135	0.0156	0	0.00882	0	0.0184	0.0089	0.0185	0.023	0.00333	0.0366	0	1.78e-19	5.02e-18	5.99e-18	0.0401	0.248	0	0.0461	0.00927	0.0554
TCGA-AN-A0FK-01	High	1.19047	2.23e-18	0	6.5e-19	0	0	0	0	0.0503	0.0128	0.0122	0.0183	4.74e-18	2.73e-18	5.25e-19	0	0.0988	0.0518	8.83e-18	0.0137	0.0531	0.0668
TCGA-A2-A0ET-01	Low	0.975612	0.0334	0.0106	4.22e-19	0.0203	0.0486	0.0445	0.0078	0.00672	0.0186	2.05e-19	0.0535	0	0	0	0	0.0912	0.0578	0.0221	0.0848	0.00336	0.0881
TCGA-C8-A12N-01	Low	0.975255	0	1.36e-20	0	0.00842	2.14e-19	0.00238	0.0113	0.016	0.039	0.00658	0.0441	0.0111	0	3.48e-18	7.17e-18	0.0757	0.0163	0.00531	0.0521	0.0682	0.12
TCGA-BH-A0C0-01	Low	0.974841	0.13	0.0192	0.0297	0.00913	0.0704	0.226	0.044	0.0127	0.113	0.0941	0.0542	0.0199	0	4.99e-18	0.00463	0.177	0.284	3.81e-18	0.268	0.013	0.281
TCGA-BH-A0BP-01	High	1.1905	0	5.54e-19	1.33e-19	6.2e-19	3.6e-19	0	0	0.0984	0.00802	5.4e-21	0.0434	3.56e-18	8.16e-20	1.15e-18	3.23e-18	0.0228	0.000219	2.87e-18	0.0141	0.355	0.369
TCGA-GM-A2DM-01	Low	0.974567	0.0266	0.0083	4.19e-18	0.00156	0.011	0.0261	0.00278	0.00978	0.0862	0.0447	0.0464	0.0271	0	2.98e-18	2.35e-18	0.0582	0.0237	0	0.119	0.00489	0.124
TCGA-BH-A2L8-01	Low	0.97353	0.109	0.00999	0.0204	0.0209	0.119	0.211	0.0327	0.0175	0.0485	0.0292	0.0586	0.00616	0	0	0	0.12	0.156	1.44e-17	0.227	0.091	0.318
TCGA-E9-A1NE-01	Low	0.972938	0.138	0.0578	0.0474	0.0247	0.237	0.358	0.0289	0.0339	0.04	0.0296	0.0367	0.00798	9.67e-20	0	0.0203	8.56e-19	0.237	6.12e-18	0.316	0.078	0.394
TCGA-BH-A0B4-01	Low	0.971888	0	0	5.72e-21	0.00188	0.0028	0.0683	0.0103	0.136	0.0362	0.0192	0.0539	0	3.85e-20	5.99e-18	5.92e-18	0.113	0.104	0	0.041	0.116	0.157
TCGA-E2-A1L7-01	Low	0.971762	0.0224	0.019	2.32e-18	0.0211	0.0473	0.132	0.0452	0.00496	0.0379	0.0374	0.0285	0	1.04e-18	5.91e-19	0.0198	0.0753	0.261	0	0.103	0.0599	0.163
TCGA-D8-A1XB-01	High	1.19082	6.65e-19	1.88e-19	3.22e-18	0	1.92e-18	0	0	0.00541	0.000179	1.87e-18	0.0198	0	3.37e-21	0	0	0.048	0.0098	0.000745	0.0265	0.0351	0.0615
TCGA-A8-A09T-01	High	1.19096	0	0	0	0.00231	1.71e-18	6.17e-19	0	0.00359	0.0477	0.0105	0.036	0.0004	0	0	0	0.0731	0.0691	0	0.0419	0.0555	0.0973
TCGA-D8-A1JU-01	Low	0.971724	4.12e-18	2.22e-19	9.35e-21	0.00757	0.00952	0.0412	0.0215	0.114	0.0327	8.64e-19	0.0874	0.0192	0.000156	0	4.37e-18	0.00667	0.011	1.38e-18	0.0753	0.308	0.384
TCGA-AO-A03P-01	High	1.19126	0	0.00197	1.25e-17	0.00276	4.16e-18	0	0.0128	0.0483	0.0132	0.00496	0.0219	0	1.17e-19	5.34e-19	7.53e-18	0.0728	0.12	4.43e-19	0.0345	0.0247	0.0592
TCGA-LL-A7SZ-01	High	1.19159	0.235	6.75e-19	0.0212	0.0157	0.0786	0.14	0.0576	0.0224	0.0883	0.0715	0.0683	0.0227	0	9.55e-19	0	0.244	0.134	0	0.33	0.0221	0.352
TCGA-B6-A2IU-01	Low	0.970307	0	0	0	5.79e-22	4.24e-18	0	1.41e-19	0.0417	0	0.00165	0.0256	1.53e-18	0	0	3.52e-19	0.0705	0.0371	0	0.00953	0.037	0.0465
TCGA-B6-A40B-01	High	1.19201	0	0	0	1.86e-19	9.1e-18	0	0.00271	0.024	0.0115	0.00473	0.0304	4.79e-18	0	4.67e-19	1.53e-17	0.11	0.0193	0	0.0221	0.0935	0.116
TCGA-LL-A8F5-01	High	1.19226	0.148	0	2.39e-18	0.00403	0.0187	0.0605	0.0186	0.0415	0.0212	0.0164	0.032	0.00626	1.76e-18	6.83e-20	0	0.256	0.125	3.15e-18	0.144	0.0207	0.165
TCGA-A2-A1FV-01	High	1.19334	9.67e-19	0	0	0.00236	3.05e-18	1.67e-17	0	0.0722	0	0	0.0136	4.76e-17	0	0	0	0.0024	0.0471	2.86e-18	0.0179	0.0978	0.116
TCGA-D8-A1XK-01	High	1.19346	0.00811	0.0218	2.58e-20	0.00699	0.00152	0.0479	0.0227	0	0.0625	0.0405	0.0215	0.0348	0.00142	0	5.48e-18	0.146	0.504	1.44e-17	0.0975	1.79e-19	0.0975
TCGA-BH-A0DV-01	Low	0.969683	0	0	1.71e-17	0.00238	5.29e-19	0.0128	0.0042	0.286	0.0261	0.000338	0.0663	0	0.000739	0	1.73e-17	0.0243	0.00337	0	0.0276	0.356	0.384
TCGA-BH-A0H3-01	Low	0.969478	6.04e-18	0.00377	2.91e-19	0.0139	0.0288	0.0643	0.0109	0.102	0.0118	2.23e-19	0.0287	3.11e-19	2.22e-20	0	0	0.00811	0.0479	0.00234	0.0408	0.147	0.187
TCGA-E2-A15E-01	High	1.1939	0	0	0	0	2.11e-18	3.92e-18	2.12e-19	0.0127	0.00234	8.07e-19	0.0206	0	0	0	0	0.0728	0.0013	0	0.0144	0.0711	0.0855
TCGA-GM-A2DC-01	Low	0.968824	0.0127	2.92e-20	0	0.00808	0.0168	0.0231	0.00156	0.0515	0.0107	0	0.0463	0	0	2.83e-20	0	0.0706	0	0	0.0362	0.0482	0.0844
TCGA-AC-A3QP-01	Low	0.968609	0.0207	0	3.14e-18	0.0101	0	0.0317	0	0.0625	0.0594	0.0337	0.0631	0.00716	1.36e-20	0	2.87e-17	0.0967	0.00292	0	0.0712	0.107	0.179
TCGA-A2-A0CW-01	Low	0.968174	0.0356	0.00669	0	0.00435	0.0192	0.0308	0.00971	0.011	0.0299	0.0214	0.0333	0	0	0	0	0.12	0.207	6.06e-19	0.0711	0.00551	0.0766
TCGA-E2-A1IU-01	Low	0.96671	0.0664	2.48e-19	5.59e-21	0.00239	0	0.019	0.00297	0.0325	0.0179	0.00311	0.0315	2.35e-18	0	0	4.16e-18	0.0531	0.0132	0.00139	0.0672	0.0163	0.0835
TCGA-GI-A2C8-01	High	1.19474	0	0.000562	0	0.00211	0.00102	0.0512	0.00315	0.0736	0.0657	0.0236	0.056	0.0329	0.000373	1.69e-18	1.33e-18	0.0215	3.12e-19	0.00184	0.0787	0.109	0.188
TCGA-E2-A153-01	High	1.19482	6.29e-19	0	0	8.61e-20	0	0	0.00138	0.107	0.0477	0.0211	0.0445	0.0213	0.00074	0	0	0.047	7.63e-19	7.9e-19	0.0611	0.133	0.194
TCGA-A2-A4S0-01	Low	0.966399	0.00121	0	0	2.28e-19	4.21e-19	6.93e-19	1.56e-20	0.0528	0.0214	0.00382	0.0328	0	0	1.89e-17	0	0.0601	5.51e-18	5.52e-20	0.0258	0.0264	0.0522
TCGA-D8-A1XL-01	High	1.19726	0.127	0.0126	0	0.0101	0.054	0.14	0.0356	0.011	0.0577	0.0584	0.0314	0.0127	0	0	8.82e-18	0.237	0.201	0	0.198	0.0122	0.21
TCGA-AC-A2FK-01	Low	0.966093	0	1.19e-19	2.7e-18	0	0.0111	0.0253	0.0123	0.0603	0.000735	0	0.0196	0	0.000726	1.98e-17	3.88e-19	0	1.01e-18	0	0.0256	0.108	0.133
TCGA-E9-A245-01	High	1.19756	0	0	0	0	6.18e-18	2.79e-18	6.32e-20	0.0346	0.0134	0.00242	0.0279	0	5.11e-19	0	9.09e-19	0.0767	0.0233	0	0.0169	0.0354	0.0523
TCGA-A2-A0YM-01	High	1.19763	0.0249	0.00968	0	0.000517	0	0.0203	0.0282	0.00224	0.05	0.0385	0.0221	0.0389	0	0	0	0.117	0.295	0.00596	0.0967	0.0156	0.112
TCGA-AC-A3HN-01	Low	0.964815	0.00499	0	0.00457	0.00276	3.08e-19	0.0273	0.0118	0.144	0.043	0.011	0.0738	0.00449	0	0	0	0.0482	0.01	0	0.0564	0.213	0.27
TCGA-A8-A07P-01	High	1.19785	2.78e-20	0.00283	0	0.00203	1.2e-18	0.0146	0.00868	0.0204	0.0447	0.0131	0.0621	0.0098	2.4e-20	7.02e-18	3.45e-17	0.0759	0.105	0	0.0662	0.0207	0.0869
TCGA-EW-A1P0-01	High	1.19814	0.0188	0.0167	0	0.00623	0.0123	0.0327	0.00677	0.00523	0.0374	0.00753	0.0634	2.03e-20	0	0	0.00227	0.075	0.0604	0.0273	0.0681	0.0417	0.11
TCGA-A8-A091-01	High	1.19897	0.0121	0.0053	1.6e-19	0.00493	0.00773	0.0346	0.000888	0.0592	0.0159	0	0.0349	0.00455	0.00242	0	0.00121	0.0338	0.0182	4.58e-20	0.0424	0.0334	0.0758
TCGA-E9-A22B-01	High	1.19925	0	0.00531	0	0.00605	0.00754	0.0258	0.00329	0.103	0.0354	0.0133	0.0628	0.0024	0.00132	0	0	0.0274	0.108	0	0.0411	0.145	0.186
TCGA-Z7-A8R6-01	High	1.19937	0.0017	3.58e-20	2.22e-18	0.00323	0	4.18e-19	2.51e-20	0.0125	0.024	0.009	0.0467	4.72e-18	1.36e-19	3.37e-19	0	0.178	0.103	0	0.0275	0.0236	0.0511
TCGA-AO-A1KP-01	High	1.20011	1.03e-18	1.74e-20	1.56e-19	0.00855	7.34e-18	0	0	2.81e-18	3.16e-18	0	0.00867	0	0	0	1.7e-17	0.089	0.139	0	0.0103	0.0471	0.0574
TCGA-C8-A1HL-01	High	1.20071	0.0015	0.00416	3.51e-19	0.00409	0	0.000973	4e-20	0.153	0.0454	0.0142	0.0678	0.00557	0.000214	0	0	0.0704	0.233	3.39e-18	0.0414	0.0763	0.118
TCGA-EW-A1OX-01	Low	0.964668	0.00148	0.000596	0	0.00587	0	0.019	2.64e-20	0.024	0.00165	0	0.0171	0	1.33e-18	0	3.34e-18	0.107	0.0191	9.81e-20	0.015	0.012	0.027
TCGA-E9-A1RA-01	Low	0.963318	0.0476	0.000524	2.11e-19	0.00626	0.00587	0.024	0.00309	0.0249	0.00802	1.09e-18	0.0406	0	0	1.97e-18	0	0.0593	0.0558	0	0.0514	0.0725	0.124
TCGA-AR-A2LL-01	High	1.20096	0.0415	0.00475	0	0.00671	0.0114	0.0179	0.0212	0.00221	0.0855	0.026	0.102	0.0199	9.05e-20	0	0	0.0811	0.0676	0.00605	0.147	0.0367	0.184
TCGA-3C-AALK-01	Low	0.962816	3.2e-18	7.16e-19	0	0.00741	8.4e-19	0.0188	0.00801	0.0347	0.00525	0.00206	0.0195	0	0	3.33e-17	0	0.0942	0.0484	9.2e-20	0.0149	0.0864	0.101
TCGA-C8-A135-01	High	1.20229	6.1e-20	0.0104	0	0.0113	0.0344	0.0803	0.00873	0.0938	0.00871	0.00308	0.0391	0	0	0	0	0.0681	0.189	0	0.0392	0.094	0.133
TCGA-OL-A66O-01	Low	0.960813	0	3.55e-21	0	0.0128	2.66e-18	2.95e-18	0	0.0137	4.08e-19	0	0.00783	2.67e-17	0	6.77e-19	0	0.182	0.0847	0	0.00508	0.0444	0.0495
TCGA-B6-A0RL-01	High	1.20312	0.0255	0	0	0.00405	0	0	2.67e-19	0	0.00891	0	0.0214	0	0	2.35e-17	5.18e-18	0.146	0.135	0	0.0402	1.55e-17	0.0402
TCGA-AC-A3EH-01	High	1.20409	0	3.34e-20	1.02e-18	3.03e-19	0	0.0184	0.0035	0.0326	0.0113	0.00858	0.0236	0.00487	2.03e-21	0	6.84e-18	0.106	0.00541	0	0.0272	0.0334	0.0606
TCGA-BH-A18K-01	High	1.20566	2.03e-18	0	4.52e-18	0.00463	2.87e-18	3.37e-18	0.00284	0.0602	0.0196	0.00525	0.0358	3.93e-18	2.65e-19	3.55e-19	0	0.0953	0.0688	1.3e-18	0.0209	0.0988	0.12
TCGA-A7-A5ZV-01	High	1.20664	0.0106	6.34e-19	0	0.000609	0.00973	0	0.00985	0	0.039	0.0157	0.0484	0.0151	0	0	2.25e-19	0.119	0.117	0	0.0592	2.97e-21	0.0592
TCGA-E2-A150-01	High	1.20709	0.00985	0.0104	1.51e-18	0	0.000499	0.00449	0.0142	0.037	0.0342	0.00922	0.0411	0	1.58e-18	8.95e-18	0	0.0323	0.163	0.0557	0.0435	0.0247	0.0682
TCGA-OL-A5D8-01	Low	0.959995	0.00399	0	5.99e-18	0.000221	9.72e-20	0.00802	0.00637	0.0151	0.0152	0.00659	0.0244	7.8e-18	0	0	0	0.159	0.00128	0.0206	0.0357	0.024	0.0597
TCGA-BH-AB28-01	Low	0.958738	0.0768	0.00109	0.00317	0.00368	0.0155	0.0468	0.0107	0.0281	0.0165	0	0.0464	0.0105	0	1.79e-19	0	0.0513	0.049	0	0.0945	0.122	0.216
TCGA-BH-A18N-01	High	1.2074	0	0	0	6.45e-21	2.75e-18	0	4.71e-19	0.0606	0.0205	1.17e-19	0.0264	1.81e-17	0	0	0	0.0452	0.0231	7.18e-20	0.0247	0.055	0.0797
TCGA-A8-A07S-01	High	1.20873	0.0115	2.85e-18	0	0	3.61e-18	0	0	0.0233	0.0361	0	0.0921	2.59e-18	0	0	3.08e-18	0.0682	0.0822	1.17e-19	0.0454	0.0434	0.0888
TCGA-A8-A08X-01	Low	0.958611	0.14	9.2e-24	1.24e-18	0.00216	0.0313	0.0503	0.0324	0.0221	0.0517	0.0546	0.0331	0.0136	3.21e-19	0	0	0.123	0.153	2.74e-19	0.19	0.0277	0.218
TCGA-E2-A15G-01	Low	0.958455	8.85e-20	0	6.59e-18	0.000569	0	0	0.000309	0.0299	0.00925	0	0.0201	0	4.27e-19	0	0	0.0543	0.00115	3.57e-05	0.0181	0.0228	0.0409
TCGA-E2-A10F-01	Low	0.957955	0.00896	0.00221	0	0.00323	0.016	0.0555	0.00202	0.0161	0.0794	0.0255	0.0763	0.0124	0	0	0	0.0359	0.0717	0.00424	0.0997	0.0816	0.181
TCGA-BH-A0C7-01	High	1.20962	0.0198	0.00983	0	0.00327	0.00869	0.0274	0.00626	0.0154	0.00718	0.00364	0.0181	0.00392	4.55e-20	0	0.00077	0.0601	0.208	0	0.0466	0.0424	0.089
TCGA-BH-A0HU-01	Low	0.957022	0	0	0	0.00513	0	0	0	0.0158	0.00669	5.98e-19	0.0378	6.34e-18	0	1.57e-18	0	0.18	0.144	4.47e-18	0.0135	0.0327	0.0463
TCGA-A8-A08T-01	High	1.21275	0.00235	0	1.58e-18	1.51e-18	8.99e-19	0	0	0.00883	0.0117	0	0.0285	0	1.11e-18	6.49e-19	0	0.0458	0.0575	4.99e-19	0.0274	0.0297	0.0571
TCGA-E9-A22E-01	Low	0.95662	0	4.87e-19	8.06e-22	0.0198	0.0495	0.0873	0.00518	0.0821	0.0345	0.0124	0.0435	0.00141	0	0	7.26e-19	0.0278	0.119	1.94e-19	0.0664	0.16	0.226
TCGA-E2-A15S-01	Low	0.956329	0	1.28e-19	0	0.0121	0	0	0	0.0374	2.96e-19	1.15e-18	0.0105	0	0	0	0	0.1	0.23	1.38e-17	0.0152	0.0187	0.0339
TCGA-A7-A26H-01	High	1.21547	0.0356	0.0107	0	0	0.012	0.0348	0.0118	0.00427	0.0546	0.00785	0.0577	0.00342	6.78e-19	0	0	0.0222	0.0608	0.0187	0.0968	0.0827	0.18
TCGA-OL-A6VR-01	Low	0.9558	0	0	2.4e-18	0.00322	0	0	0.000317	0.0137	0.00593	4.15e-19	0.0149	0	0	3.64e-18	0	0.0995	0	0	0.00867	0.0196	0.0283
TCGA-GM-A2DF-01	Low	0.955368	0.157	6.35e-20	1.02e-19	0.00455	0.122	0.121	0.0363	0.058	0.0807	0.0742	0.0676	0.0415	0.000612	3.62e-19	6.01e-20	0.112	0.26	7.22e-20	0.292	0.104	0.397
TCGA-D8-A1Y2-01	High	1.21656	0.0996	0.0238	0	0.011	0.0505	0.123	0.021	0.0415	0.197	0.103	0.153	0.106	0	0	0	0.07	0.16	0	0.334	0.0823	0.416
TCGA-D8-A73W-01	High	1.21842	0.000276	1.66e-20	0	1.25e-19	7.28e-19	0.0173	0.000968	0.104	0.0632	0.0487	0.0458	0.0292	0	4.75e-18	2.05e-18	0.0396	0.006	0.00515	0.0689	0.125	0.194
TCGA-BH-A0GZ-01	High	1.21926	0	0	0	0.00572	2.87e-18	8.33e-20	0	0.0767	0.00487	0	0.023	2.25e-18	0	0	7.63e-18	0.0934	0.0639	0	0.00676	0.0836	0.0904
TCGA-BH-A8G0-01	Low	0.954725	0.222	2.61e-20	0.0204	0.000452	0.00845	0.0625	0.0184	0.104	0.0766	0.0323	0.0889	0.0233	1.48e-19	3.79e-18	0	0.0178	0	3.93e-18	0.248	0.163	0.411
TCGA-A2-A1G1-01	Low	0.953931	0.0941	0.0426	0	0.00996	0.0256	0.0748	0.0326	0.0257	0.0766	0.0414	0.0574	0.0466	0	0.00199	0	2.31e-19	0.558	0.0223	0.204	0.0128	0.217
TCGA-E2-A14U-01	Low	0.953863	2.84e-18	0	2.69e-18	1.03e-18	2.76e-18	0	0.00266	0.0216	0.00974	0.00437	0.0218	0	0	2.49e-18	0	0.0348	0	0	0.0101	0.048	0.0581
TCGA-A7-A13E-01	Low	0.953689	3.16e-20	0.000164	6.27e-19	0.00974	0.0251	0.0154	0.00369	6.68e-21	0.00903	0.00298	0.0267	0	0.002	9.23e-19	7.1e-18	0.121	0.189	0.00363	0.0336	0.0102	0.0438
TCGA-BH-A1FH-01	High	1.2193	0	0	0	0.00101	4e-19	0.00468	0.00736	0.121	0.00765	0	0.0282	0.00165	0.00116	2.11e-17	0	0	0.0152	2.96e-18	0.0201	0.226	0.246
TCGA-C8-A12O-01	High	1.21989	0.0258	0.00749	0	0.0125	0.00798	0.0182	0.00294	0.0174	0.0529	0.0214	0.0514	0.0169	1.22e-19	1.76e-18	1.89e-18	0.0334	0.148	0.0147	0.0905	0.0125	0.103
TCGA-AC-A5EH-01	Low	0.951777	0	2.17e-21	0	0.00493	0	0.0197	2.32e-21	0.00983	0.0452	0.0334	0.0376	0.0229	0	0	2.26e-18	0.0776	0.0999	1.17e-18	0.0544	0.0214	0.0758
TCGA-B6-A1KC-01	Low	0.951314	0.0116	0.00544	0	0.00663	0	0	0.000697	0.0328	0.0109	0.000263	0.02	6.45e-19	1.92e-19	0	5.01e-18	0.0761	0.1	0.00163	0.0415	0.0164	0.0579
TCGA-AR-A2LO-01	Low	0.950953	0.0552	7.08e-21	0.00667	5.36e-19	0.0209	0.0957	0.0148	0.052	0	1.58e-18	0.0342	0	3.5e-18	6.61e-19	0	0.0604	0.0677	7.91e-18	0.064	0.156	0.22
TCGA-B6-A0RN-01	Low	0.949785	4.15e-19	4.72e-21	0	0.0105	2.34e-22	0.0288	0.000444	0.00762	0.00243	0	0.0217	0	0	0	4.35e-18	0.0506	0.0295	0.000975	0.0113	0.0937	0.105
TCGA-A1-A0SE-01	Low	0.949774	1.89e-18	0	0	0.00688	0	0.0259	0.00115	0.0437	6.85e-21	1.65e-18	0.0142	2.78e-19	8.25e-20	9.91e-18	0	0.0723	0.0525	5.94e-19	0.0137	0.0528	0.0665
TCGA-BH-A28Q-01	Low	0.947807	0	0	1.04e-18	0.00216	0	0.0179	0.00268	0.0232	0.00144	1.67e-18	0.0229	0	0	0	0	0.0399	0.0247	0.00278	0.0189	0.0754	0.0943
TCGA-EW-A1PG-01	High	1.22165	0	4.58e-20	0	0.00744	7.03e-18	0	0.00262	0.0541	0.000794	0	0.0117	1.56e-17	0.000265	1.14e-17	0	0.0341	0.0132	5.36e-19	0.00631	0.105	0.111
TCGA-A8-A099-01	Low	0.947029	0	0	5.44e-19	0	0	0.0131	0.00396	0.0138	0.0138	4.31e-19	0.0244	0	1.35e-18	3.2e-18	0	0.0297	0.0488	0.0116	0.0171	0.0135	0.0305
TCGA-BH-A0DI-01	High	1.2217	0	1.77e-18	0	0	5.77e-22	0.0413	0.0163	0.0969	0.0442	0.015	0.0711	8.49e-18	0	1.43e-17	3.06e-18	0.0335	0.062	1.27e-18	0.0494	0.162	0.212
TCGA-BH-A204-01	High	1.2218	0	0.00223	0	0.0039	0	1.91e-19	4.29e-19	0.0345	0.0168	1.56e-18	0.0365	0	0.00089	0	1.49e-18	0.0202	0.253	1.04e-17	0.021	0.0315	0.0525
TCGA-D8-A27L-01	High	1.2221	0.00684	0.00206	0	0.00713	0.000775	0.0286	0.0181	0.024	0.0221	0.00256	0.0455	0.0103	0	2.83e-18	3.56e-19	0.025	0.0285	0.0155	0.0606	0.0669	0.127
TCGA-D8-A27P-01	Low	0.946957	0	0	3.11e-18	0.00433	3.27e-19	1.97e-19	0	0.00574	0.00906	0.00138	0.0163	0	0	0	8.33e-18	0.0365	0.0117	8.22e-19	0.0156	0.0162	0.0318
TCGA-D8-A1JG-01	High	1.22263	0.168	0.0192	0.00964	0.00303	0.0315	0.0634	0.0286	0.0153	0.0659	0.0548	0.037	0.0327	0	0.0101	0.0125	0	0.246	5.66e-20	0.242	0.0137	0.256
TCGA-OL-A6VO-01	High	1.22273	0.0193	0.00205	3.93e-18	0.0106	0.0099	0.0153	0.00979	0.00896	0.0287	0.0293	0.0272	6.42e-19	6.97e-20	2.81e-18	7.06e-18	0.235	0.259	0.00531	0.0475	0.00955	0.057
TCGA-HN-A2OB-01	Low	0.946738	0	4.1e-18	5.42e-18	0.00119	6.69e-19	0.00226	0	0.0662	0	0	0.0283	0	7.84e-20	3.39e-18	0	0.024	3.86e-18	2.45e-20	0.0137	0.288	0.302
TCGA-EW-A1P3-01	Low	0.946659	0	3.4e-19	0	0.00269	0	0	7.87e-20	0.0517	0.00291	6.93e-19	0.0376	0	0	0	0	0.11	0.0411	0	0.0152	0.145	0.16
TCGA-A8-A0A4-01	High	1.22301	0	0	0	5.29e-20	0	0	0	0.0486	0	0	0.0199	2.45e-18	0	3.58e-18	0	0.0604	0.0366	0	0.00989	0.109	0.119
TCGA-AR-A0U4-01	High	1.22315	0.0905	0.0203	0	0	0	0.0252	0.0432	0.0195	0.136	0.0693	0.047	0.15	0.00916	7.37e-19	5.82e-18	0.0597	0.359	0.00121	0.292	0.0405	0.332
TCGA-AC-A6IX-06	Low	0.946469	0.388	0.021	0.0543	0	0.0679	0.16	0.0211	0.0118	0.00278	0	0.0381	2.44e-18	5.85e-19	1.61e-17	0	0.0166	0.0507	0	0.331	0.0934	0.425
TCGA-AR-A252-01	Low	0.94508	0.172	0.0974	0.0624	0.00989	0.222	0.376	0.0956	0.0584	0.0551	0.0282	0.0629	0.0395	0	8.97e-18	0.0139	0.027	0.191	0	0.423	0.15	0.573
TCGA-AR-A1AK-01	Low	0.94433	6.31e-20	0.00306	0.00916	0.00697	0.0313	0.0916	0.0154	0.12	0.0642	0.0456	0.0631	0.00708	1.77e-20	5.9e-18	0	0.0491	0.076	3.85e-20	0.087	0.0935	0.18
TCGA-AO-A0JA-01	High	1.22354	0	0.00115	4.27e-19	1.48e-18	0	0.0339	0.00261	0.0313	0.0297	0.0181	0.0413	0	0.0017	0	0	0.0235	0.114	0.028	0.0358	0.0865	0.122
TCGA-A2-A0EW-01	Low	0.944205	0	0	2.1e-18	0.00504	0	0.0333	0.00575	0.117	0.0116	1.17e-18	0.0612	0	5.33e-19	7.93e-18	0	0.0118	0	1.98e-19	0.0223	0.275	0.297
TCGA-A2-A0T1-01	Low	0.943241	0.0687	0.0115	0.0324	0.00374	0.11	0.183	0.0614	0.127	0.107	0.0812	0.0676	0.0132	2.06e-18	0	0	0.118	0.221	0	0.24	0.148	0.388
TCGA-BH-A0HP-01	Low	0.942574	0	5.73e-19	3.97e-19	0.000174	0	0.0323	0.00184	0.0927	0.0129	0.000392	0.0399	0	1.67e-19	7.38e-18	0	0.0324	0.0491	0	0.0169	0.0992	0.116
TCGA-E9-A249-01	Low	0.938411	0.022	0.00393	4.04e-19	0.00769	0.0106	0.0296	0.000812	0.00146	0.0215	0	0.0382	3.65e-19	1.94e-19	7.4e-19	7.74e-18	0.0873	0.13	0	0.0498	0.0135	0.0633
TCGA-E9-A1R4-01	Low	0.938133	0.0786	0.0262	0.0427	0	0.0168	0.103	0.0193	0.00641	0.0886	0.059	0.063	0.0242	8.31e-20	2.94e-18	0.00718	0.0545	0.106	0.00164	0.175	0.0274	0.202
TCGA-C8-A26V-01	High	1.22403	0.0122	0.00755	4.66e-19	0	0.00583	0.0132	0	0.00556	0.0322	0.0123	0.0354	1.98e-19	1.81e-18	0	0	0.0678	0.0971	0.0126	0.0465	0.00278	0.0492
TCGA-E9-A229-01	High	1.22467	0.0224	0.00893	8.42e-19	0.00293	0.0171	0.0314	0.00448	0.00293	0.0543	0.0282	0.0429	0.0158	0	0	0	0.0286	0.0898	0.00478	0.0991	0.0613	0.16
TCGA-E2-A107-01	Low	0.937392	0	0	0	3.35e-19	0	0.00628	0.00453	0.0399	0.0116	0.00254	0.0364	7.16e-18	3.85e-19	1.86e-19	0	0.143	0.105	0	0.0175	0.0524	0.0699
TCGA-C8-A12Y-01	High	1.22603	2.42e-19	4.19e-18	7.87e-19	9.8e-20	9.12e-19	1.18e-18	5.02e-20	0.018	0.0153	0.0118	0.031	0	3.89e-20	0	0	0.183	0.0344	0	0.0192	0.0226	0.0419
TCGA-PE-A5DC-01	Low	0.934993	1.29e-18	2.15e-18	9.85e-18	8.08e-19	7.68e-18	0	0	0.141	1.95e-19	0.0037	0.0249	3.21e-17	1.23e-18	0	2.72e-18	0.121	0.0443	0	0.00753	0.115	0.123
TCGA-E2-A159-01	Low	0.934848	0.0955	0.0341	0.00104	0.00188	0.053	0.129	0.0499	0.00664	0.0759	0.0547	0.056	0.016	0	4.12e-18	1.97e-18	0.124	0.288	0.0249	0.198	0.00707	0.205
TCGA-D8-A1XR-01	Low	0.934324	0	0	1e-18	0.00223	0	0	0	0.0155	0.0159	3.36e-21	0.0333	4.47e-18	0	2.02e-19	1.25e-19	0.066	0.0432	0.00282	0.0339	0.0404	0.0742
TCGA-AN-A0XL-01	High	1.22752	0	8.1e-19	0	0.0039	1e-17	4.45e-19	2.4e-21	0.165	1.74e-20	1.61e-17	0.0446	5.49e-18	0	0	4.59e-18	0.0268	0.0204	0	0.00838	0.305	0.313
TCGA-A2-A04N-01	High	1.22818	0.0313	0.000359	3.18e-19	0.00573	1.83e-19	0.00781	0.00201	0.0283	0.0208	0.000535	0.0405	2.37e-19	1.11e-20	2.06e-18	0	0.0593	0.0129	0.00107	0.0544	0.0769	0.131
TCGA-E2-A1LL-01	High	1.22892	1.31e-18	2.64e-20	1.89e-18	0	0	0	0	0.0536	0	9.39e-19	0.0193	0	1.01e-19	0	1.04e-17	0.121	0.348	1.66e-17	0.00136	0.0325	0.0338
TCGA-E9-A244-01	High	1.23033	2.24e-20	0.0149	0	0.00694	0.00507	0.0146	0.00241	0.000441	0.0118	0.00882	0.0287	1.3e-19	6.4e-22	0	1.09e-18	0.0525	0.456	3.87e-18	0.0161	0.0747	0.0908
TCGA-B6-A0IK-01	Low	0.932906	0.012	0.00303	0	0	0	0.0448	0.0124	0.0378	0.0127	0.00802	0.0318	0	7.68e-19	0	0	0.044	0.177	0	0.0283	0.0299	0.0582
TCGA-AR-A24Q-01	Low	0.929954	0.0329	0.0225	5.05e-19	0.00356	0.058	0.122	0.0214	0.024	0.0185	0.0105	0.0161	0.00644	0	3.61e-19	5.66e-19	0	0.422	7.75e-18	0.0918	0.0409	0.133
TCGA-E2-A15E-06	Low	0.929173	0.251	0.00396	1.96e-19	0.0125	0.0472	0.0516	0.00785	0	0.0182	0	0.0391	2.49e-18	1.33e-18	3.27e-17	0	0.0776	0.0106	0.0253	0.241	0.0313	0.272
TCGA-S3-AA11-01	High	1.23035	0	0	1.38e-18	0	2.45e-18	1.91e-17	0	8.65e-22	2.98e-20	8.43e-19	0.0193	0	5.56e-19	2.59e-19	3.25e-18	0.113	5.56e-19	2.01e-18	0.0208	0.00665	0.0274
TCGA-A8-A06P-01	High	1.23041	0.00018	0	0	0.00485	0	0	0.00254	0.0549	0.049	0.0124	0.0636	0.00265	0	4.28e-18	4.99e-18	0.0509	0	2.11e-19	0.0569	0.157	0.214
TCGA-D8-A1JM-01	Low	0.928962	0.0183	0.0273	3.59e-19	0	0.0155	0.101	0.00196	0.00424	0.00381	2.51e-18	0.0216	0	0.00144	0	0	0.00125	0.513	5.71e-18	0.042	0.00212	0.0442
TCGA-C8-A1HM-01	Low	0.928959	0.13	0.0453	0	0.0172	0.202	0.309	0.0328	0.00128	0.0904	0.0766	0.0455	0.0219	9.34e-19	0.0297	0.0335	0.224	0.49	0	0.362	0.000638	0.362
TCGA-D8-A73X-01	Low	0.928855	0	0	2.22e-18	0.00929	0	0	0.00631	0.0015	0.0295	0.00115	0.0457	0	0	1.64e-18	0	0.0533	0.0119	1.33e-19	0.0439	0.0489	0.0928
TCGA-A2-A0T2-01	Low	0.928601	0	1.38e-19	0	0.00341	0.00669	0.0232	0.000292	0.0762	0.0353	0.0253	0.0458	0.00805	0.00396	0	0	0.15	0.0921	5.83e-19	0.0394	0.042	0.0814
TCGA-E9-A3Q9-01	Low	0.928206	0.0367	6.25e-20	4.09e-18	0	0.00828	0.0372	0	0.0718	0.0381	0.00195	0.0924	0.000338	1.25e-18	2.82e-17	0	0.0298	0	0	0.0658	0.181	0.247
TCGA-BH-A5IZ-01	High	1.23155	0.00322	8.34e-20	2.69e-18	6.04e-21	6.79e-19	0.00637	0.00484	0.0202	0.0319	0.0401	0.0267	0.0134	0.00526	5.3e-18	1.21e-18	0.0949	0.31	2.56e-18	0.0433	0.0248	0.0682
TCGA-A2-A1G6-01	High	1.23349	0	1.95e-18	0	0.0201	0.019	0.0266	0.031	0.0523	0.00265	0	0.0289	0.00256	0.00338	3.45e-18	0	0.0115	0.00421	7.98e-19	0.0512	0.132	0.183
TCGA-B6-A0WY-01	Low	0.9282	3.7e-19	2.25e-18	4.44e-18	1.89e-19	9.25e-19	0.00724	0.0055	0.0567	0.012	0.0109	0.0203	0	4.69e-20	3.05e-19	0	0.0697	0.00894	1.45e-18	0.0149	0.0677	0.0826
TCGA-BH-A0B3-01	Low	0.927579	0.0608	0.00133	0	1.65e-05	0.0184	0.0673	0.0143	0.00646	0.0586	0.0536	0.0418	0.0254	0.000234	4.92e-18	2.13e-20	0.0947	0.419	0	0.121	0.0298	0.151
TCGA-EW-A2FR-01	High	1.23481	1.18e-19	0	0	0.0056	0.00584	0.0104	0.00248	0.0742	0.0298	0.00856	0.055	0.00799	1.15e-20	2.25e-19	7.2e-18	0.0166	0.138	0.000223	0.0349	0.121	0.156
TCGA-A8-A075-01	High	1.23501	0.0712	0.00751	0	0.00511	0.0145	0.0618	0.0224	0.013	0.0645	0.0427	0.0513	0.00929	1.09e-19	0	0.00132	0.107	0.19	0.00532	0.14	0.0507	0.191
TCGA-A7-A13G-01	Low	0.925783	0	0	0	0	0	5.32e-18	0	0.0103	0	0	0.0138	1.08e-17	0	1.44e-17	6.68e-18	0.0422	0	0	0.011	0.0245	0.0354
TCGA-D8-A145-01	High	1.23525	0.0276	0	0	0.0155	0.00898	0.0355	0.00567	0.0701	0.00298	1.16e-18	0.0292	1.49e-19	0	0	8.66e-20	0.02	0.0103	1.18e-18	0.0473	0.152	0.199
TCGA-E9-A1R6-01	High	1.23846	3.35e-19	0	0	0.00392	0	7.14e-20	3.91e-19	0.014	0.0157	0.00424	0.0226	5.58e-19	5.36e-20	0	1.07e-17	0.0936	0.0893	0	0.0186	0.025	0.0436
TCGA-AR-A0TT-01	Low	0.925698	0.27	0.0801	0.0677	0.00925	0.132	0.239	0.0278	0.0267	0.112	0.0791	0.0641	0.0632	0	1.94e-19	0.0158	0.0507	0.197	0.0179	0.444	0.0564	0.501
TCGA-A8-A09X-01	Low	0.925121	0.0977	0.0148	0.013	0.00508	0.0686	0.174	0.0228	0.0678	0.0842	0.0672	0.0759	0.0108	0	0	0	0.122	0.256	0	0.207	0.0487	0.256
TCGA-D8-A27H-01	High	1.23896	1.81e-19	0	7.91e-20	0.000305	0.006	0.00242	0.000909	0.0275	0.0115	0.0152	0.0162	0.00941	2.7e-20	7.27e-20	3.62e-19	0.00666	0.189	0	0.02	0.0383	0.0583
TCGA-E2-A1BC-01	High	1.24355	0	1.55e-20	0	0.00961	2.35e-19	0.0131	0	0.0621	2.87e-18	6.5e-18	0.0229	0	0	0	8.78e-19	0.00749	0.00445	0.00951	0.0113	0.254	0.265
TCGA-EW-A1PH-01	High	1.24358	0.00396	0.0057	4.51e-18	0.0249	0.0243	0.0236	0.00209	0	0.0128	0.00622	0.0232	8.56e-19	0.00209	0	1.12e-18	0.0162	0.46	0	0.0319	8.81e-19	0.0319
TCGA-AO-A1KO-01	High	1.24719	0	0	3.47e-18	0.0134	0.0271	0.0285	0.00555	0.0331	2.22e-18	0	0.0141	0	3.67e-20	0	0	0.011	0.00968	0.00668	0.0278	0.0964	0.124
TCGA-E9-A24A-01	High	1.24793	0.0357	0.00152	0	1.32e-19	2.94e-18	0.00463	0	0.0374	0.0795	0.0216	0.0544	0.0147	2.59e-19	2.85e-19	6.45e-19	0.00437	0.0578	0.0104	0.102	0.0347	0.136
TCGA-E9-A1RI-01	High	1.25033	1.62e-21	0.00696	4.47e-20	0.0173	0.0214	0.0386	0	0.00902	0.0382	0.0049	0.0462	0.00444	0	3.42e-18	0	0.0289	0.0505	0.0121	0.0604	0.0603	0.121
TCGA-A8-A08F-01	High	1.2507	0.0178	0.00272	6.68e-19	0.0179	0.0126	0.0523	0.016	0.0239	0.104	0.0773	0.0498	0.0376	0	2.53e-18	0	0.182	0.0994	2.22e-19	0.137	0.012	0.149
TCGA-E2-A105-01	High	1.25221	2.04e-20	3.98e-19	4.38e-18	0.0112	0	4.32e-18	4.55e-21	0.0137	0.0166	0.00221	0.0429	0	0	0	0	0.121	0.0971	0	0.0217	0.0161	0.0379
TCGA-AR-A0U2-01	Low	0.923909	0.00361	0.023	7.07e-19	1.59e-20	0.0207	0.0691	0.0073	0.0169	0.021	0.012	0.033	0	1.43e-18	4.78e-18	1.36e-18	0.0589	0.386	9.26e-19	0.0472	0.0196	0.0668
TCGA-AR-A255-01	High	1.25251	0.00732	0.0153	0	0.00432	0.00908	0.0502	0.0111	0.0419	0.0374	0.0117	0.0598	0	0	0	0	0.0468	0.129	0.00951	0.0631	0.0955	0.159
TCGA-A7-A4SF-01	High	1.25264	0.0438	0	7.13e-18	0.00303	0	0.0419	0.0172	0	0.02	0.0119	0.0304	0	0	2.57e-18	9.38e-18	0.193	0.062	4.69e-19	0.0669	0.0281	0.0949
TCGA-BH-A18T-01	High	1.2531	0.00375	0.0122	1.13e-17	0.00412	2.03e-19	0.0326	0.00968	0.0144	0.016	0.0151	0.0247	2.05e-18	0.00164	0	5.14e-18	0.0766	0.561	0	0.0278	0.0346	0.0624
TCGA-BH-A42V-01	Low	0.923149	0	0	0	0.00522	0.00371	0.0431	0.0233	0.15	3.19e-19	0	0.0241	3.72e-19	0	2.2e-18	0	0.0619	8.18e-19	0	0.0232	0.188	0.212
TCGA-AR-A24N-01	High	1.25356	0.0243	0.0129	1.43e-18	0.00113	0.00651	0.0337	0.000939	0.00588	0.0164	2.68e-19	0.0308	0.00192	2.23e-20	0.000542	3.01e-18	0.0273	0.166	0.0381	0.0593	0.0573	0.117
TCGA-D8-A3Z6-01	High	1.25369	0	0	0	0	1.57e-18	0	3.42e-19	0.0875	0.0123	0.00605	0.0291	3.06e-18	0	0	1.48e-17	0.0752	0	1.41e-20	0.0117	0.0775	0.0891
TCGA-OL-A6VQ-01	Low	0.922421	0	0	8.4e-18	0.00303	0	0.0216	0.0127	0.0758	0.000543	2.19e-18	0.0219	0	0.00011	0	0	0.0252	0.0024	2.72e-19	0.0223	0.152	0.174
TCGA-E9-A1RG-01	High	1.25387	0.0231	0	2.14e-18	0.00807	0.00889	0.039	0.0154	0.0318	0.0378	0.0255	0.0511	0.0222	0	0	2.61e-18	0.196	0.0636	2.61e-18	0.0746	0.0547	0.129
TCGA-E9-A1N9-01	High	1.2546	1.29e-18	0.0163	5.57e-19	0.011	0	0.0296	0.00471	0.057	4.49e-19	2.26e-18	0.0152	0	2.72e-19	0	3.88e-18	0.0364	0.244	6.94e-18	0.00902	0.0505	0.0595
TCGA-A2-A3KD-01	High	1.25483	3.66e-19	3.82e-20	2.43e-18	0.00331	0	0.0139	0.00469	0.0463	0.0243	0.0131	0.0257	0.000546	0	4.57e-18	0	0.0393	0.0351	0.0185	0.036	0.0621	0.0981
TCGA-AO-A1KQ-01	Low	0.921547	0.0503	0.00165	5.54e-19	0.0321	0.0767	0.159	0.00834	0.00746	0.0454	0.0302	0.0395	5.44e-18	9.04e-19	2.25e-20	7.23e-19	0.184	0.222	0	0.13	0.0421	0.172
TCGA-A2-A3KC-01	High	1.25494	0	1.25e-19	2.99e-19	5.42e-20	5.57e-19	0	0.0056	0.137	0.0117	0.00174	0.0477	7.37e-19	0	9.54e-18	5.66e-18	0.0545	0.0214	2.92e-18	0.0167	0.157	0.173
TCGA-E9-A1N3-01	High	1.25502	0.00839	0.00165	0	0.00417	0.0219	0.00878	2.49e-20	0.0109	0.0235	0.000544	0.0302	2.42e-21	0.00105	2.64e-18	0	0.0685	0.0632	9.05e-19	0.0545	0.0412	0.0957
TCGA-A2-A0CO-01	High	1.25514	0.0734	0	0.0525	0.00423	0.0455	0.129	0.0155	0.266	0.0149	0.00611	0.061	0	1.41e-18	1.24e-17	0	0.0237	8.23e-18	0	0.0996	0.337	0.436
TCGA-AR-A1AP-01	Low	0.920792	1.29e-20	0	1.6e-18	0	3.09e-18	0.0047	0.0198	0.0153	0.0559	0.019	0.0658	0.0038	0	5.27e-18	0	0.0441	0.0453	0.0153	0.0639	0.0655	0.129
TCGA-D8-A1JP-01	High	1.25651	0	1.6e-19	2.59e-19	0.00294	3.15e-18	0.0163	0.00257	0.0316	0.0398	0.0152	0.042	0.00447	0	4.27e-18	0	0.0438	0.1	0	0.0385	0.0934	0.132
TCGA-A2-A4S3-01	Low	0.918816	0.0377	0.0132	0	0.00216	0.0211	0.0786	0.0237	0.00604	0.0342	0.0223	0.043	1.52e-19	0	3.06e-19	3.23e-18	0.11	0.245	7.84e-19	0.084	0.00637	0.0903
TCGA-AC-A23C-01	High	1.25683	0.0359	0.0156	0	0.000815	0.0305	0.0671	0.0104	0.0108	0.0227	0.000674	0.043	0.00593	4.82e-19	2.64e-18	0	0.0122	0.103	0.00774	0.0883	0.0359	0.124
TCGA-AC-A7VC-01	High	1.25756	0	4.86e-19	0.00141	8.66e-19	1.4e-18	3.58e-19	0.00223	0.221	0.0125	0.00359	0.0286	0	1.87e-19	0	0	0.218	0.0911	4.32e-18	0.0103	0.172	0.182
TCGA-D8-A27K-01	Low	0.918641	0.0484	0.00908	0.00528	0.00111	0.0199	0.0592	0.00661	0.016	0.00906	0	0.0302	2.17e-19	2.23e-19	3.12e-19	0	0.0116	0.0747	0.00609	0.0698	0.0817	0.152
TCGA-B6-A0RS-01	High	1.25778	0.0175	0.00679	0	0.00215	0.0129	0.0605	0.0167	0.0183	0.0755	0.0509	0.0622	0.0122	2.48e-20	1.01e-18	6.72e-19	0.102	0.26	1.76e-18	0.0976	0.0499	0.147
TCGA-A7-A0CG-01	Low	0.918589	0.0408	0.0216	0.005	0.00107	0.0551	0.142	0.0287	0.0702	0.0203	0.00118	0.0538	0.00457	0.000626	1.68e-18	2.26e-18	0	0.141	4.88e-18	0.113	0.204	0.317
TCGA-AN-A0FS-01	High	1.25801	0	2.21e-18	1.01e-18	0.00441	0	0	0	0.0919	0.000761	1.29e-18	0.0224	4.54e-18	0.000663	6.88e-18	2.57e-18	0.0261	0.0107	0	0.012	0.181	0.193
TCGA-EW-A1J3-01	High	1.25814	0	0.00463	4.26e-19	0.0079	1.06e-18	0.0139	0.00307	0.0111	0.0203	0	0.0356	0.000953	0.00242	0	5.45e-18	0.0325	0.134	0.00239	0.029	0.00623	0.0353
TCGA-A8-A0AD-01	High	1.25906	0.0311	0	2.46e-20	0	0	0.000102	7.2e-20	0.0137	0.0691	0.00657	0.0544	0.0275	0	5.04e-20	0	0.027	0.0569	0.00157	0.109	0.0209	0.13
TCGA-BH-A1ES-06	High	1.26006	2.22e-19	7.52e-18	0	0	4.92e-18	0	7.89e-19	0.0101	0.0167	0.0101	0.0194	0.00551	0.0073	8.41e-17	0	0.0422	6.94e-18	9.06e-18	0.0245	0.0641	0.0886
TCGA-A8-A097-01	High	1.26136	0.00956	0	0	0.00583	0.00328	0.00971	0.00788	0.0193	0.0313	0.00525	0.0594	0.0133	0	3.28e-18	1.86e-18	0.0564	0.0834	0	0.0589	0.0582	0.117
TCGA-AC-A2QI-01	Low	0.91811	0.0166	0	0.00771	0	0.0164	0.0741	0.00724	0.101	0.0192	0.00779	0.0459	0.00959	0	0	3.99e-18	0.0488	0.00303	0	0.056	0.0939	0.15
TCGA-A2-A0CU-01	High	1.26148	1.51e-18	0	0	2.26e-19	2.17e-19	1.32e-18	0	0.063	0	3.58e-18	0.0349	0	0	1.27e-17	0	0.021	0.0987	2.73e-18	0.00789	0.136	0.144
TCGA-AC-A2FG-01	Low	0.917623	0	0	0	0.00562	2.59e-18	1.8e-05	0.00972	0.0627	0.000613	0	0.0219	0	1.67e-20	1.11e-17	0	0.0184	0	0	0.0154	0.152	0.167
TCGA-E2-A15A-06	Low	0.917538	0.238	0.0426	0.0525	0.00842	0.0971	0.132	0.0353	0.0132	0.0218	0.00634	0.0401	0	3.75e-18	0	0.0176	0.0504	0.231	0	0.267	0.0383	0.306
TCGA-JL-A3YX-01	High	1.26175	2.1e-18	0	0	2.05e-18	0	4.35e-18	1.27e-19	0.0296	4.6e-19	0	0.0169	0	3.43e-19	4.6e-19	0	0.166	0.0664	0	0.0194	0.0834	0.103
TCGA-BH-A1EN-01	High	1.26233	1.06e-18	1.44e-18	0	1.54e-21	0	2.82e-20	0	0.0483	0.0349	0.0148	0.0502	0	0	1.82e-17	1.74e-18	0.0708	0.0912	0	0.0319	0.0439	0.0758
TCGA-AN-A0FV-01	High	1.26256	1.96e-20	0	0	0.00658	1.02e-19	0	0	0.036	0.025	0.0125	0.0321	0.00475	1.11e-19	5.22e-18	2e-19	0.0965	0.0811	1.74e-18	0.0306	0.0252	0.0558
TCGA-AN-A0XU-01	Low	0.917268	0	0.0102	0	0.0121	0.0152	0.0692	0.0105	0	0.0142	0.015	0.0189	2.39e-18	0.00201	0.0061	1.62e-17	0.151	0.359	0	0.0345	4.23e-18	0.0345
TCGA-A2-A0YJ-01	Low	0.916849	0	1.13e-19	1.17e-18	0	4e-18	0	0.00137	0	0.0133	0.00529	0.0341	1.06e-18	0.00236	8.73e-19	9.46e-20	0.0216	0.29	0	0.0152	0.00207	0.0173
TCGA-BH-A0WA-01	Low	0.916325	3.42e-19	0.00613	7.94e-19	0	3.93e-19	0.0111	0.00382	0.0154	0.0142	0.00784	0.0114	9.37e-19	1.71e-19	0	1.11e-18	0.017	0.368	9.14e-19	0.012	0.0172	0.0292
TCGA-A8-A0A9-01	High	1.26297	0	0	0	0.00343	0	0.00781	0.00332	0	0.0421	0.0124	0.0496	0	0	6.42e-19	1.05e-17	0.103	0.03	0.00198	0.0438	0.0262	0.07
TCGA-E2-A14W-01	Low	0.915778	3.28e-19	0	3.64e-18	0.0066	3.28e-18	0	1.51e-18	0	0.0127	0.00421	0.0177	1.08e-17	4.95e-19	0	0	0.0515	0.171	1.82e-19	0.0153	0.0478	0.0631
TCGA-BH-A0EE-01	Low	0.914446	0.0485	0.00092	0	0	9.34e-19	0.0329	0.00517	0.0104	0.0103	0.00931	0.0178	2.16e-19	0	0	8.35e-19	0.181	0.32	0	0.0459	0.0104	0.0563
TCGA-D8-A140-01	Low	0.913793	0.0772	0.0162	1.06e-18	0.00587	0.0467	0.0902	0.0065	0.0314	0.0443	0.0169	0.0503	0.00621	0	1.64e-18	2.53e-19	0.0722	0.0414	0.0243	0.141	0.0266	0.167
TCGA-BH-A0HO-01	Low	0.913439	0.0106	0.0088	0	0	0.00678	0.0389	1.57e-19	0.037	0.0945	0.0368	0.0679	0.00986	1.41e-20	2.8e-18	3.91e-18	0.0755	0.022	0.00896	0.0954	0.0295	0.125
TCGA-A7-A13D-01	High	1.26346	0	8.42e-20	0	1.16e-19	0	3.68e-19	0	0.0511	0	0.00153	0.00695	7.2e-19	0.000315	2.55e-18	1.07e-18	0.129	0.15	1.06e-17	0.00027	0.0255	0.0258
TCGA-B6-A408-01	Low	0.913323	0.0608	0	0	0.0076	0.0165	0.0677	0.0075	0.0258	0.0493	0.039	0.039	0.00935	4.21e-19	6.09e-19	3.82e-18	0.118	0.00642	0.023	0.106	0.0842	0.19
TCGA-AN-A0FJ-01	Low	0.910391	0.0469	0.0111	0	0.000939	0	0.032	0.012	0.061	3.62e-19	0	0.00667	0	0	0	3.56e-19	0.0511	0.356	0	0.0411	0.06	0.101
TCGA-E2-A108-01	Low	0.909183	0.0735	0.0214	0.027	0.0111	0.204	0.317	0.0323	0.162	0.106	0.0627	0.108	0.0302	0	8.98e-19	8.73e-19	0.0501	0.152	3.25e-18	0.325	0.372	0.697
TCGA-E2-A56Z-01	Low	0.909004	0	9.69e-19	0	0.00413	0	0	0	0.0263	0.00734	0.00439	0.0241	1.24e-17	0	0	1.07e-18	0.111	0.0633	1.05e-18	0.00638	0.0381	0.0445
TCGA-AN-A0XW-01	Low	0.907767	0.0373	0.0138	0	0.0076	0.0592	0.139	0.021	0.0108	0.0524	0.031	0.0435	0.0121	4.98e-19	7.85e-18	2.33e-19	0.0339	0.277	0.00604	0.135	0.0601	0.196
TCGA-E9-A6HE-01	High	1.26392	5.74e-19	7.23e-19	0	0.000612	0	0.00516	1.21e-20	0.0448	0.0355	0.0176	0.074	0.00115	0	1.11e-18	0	0.149	0.0971	0	0.0266	0.165	0.192
TCGA-A8-A08C-01	Low	0.906211	0.00333	0.00586	2.92e-19	8.38e-23	4.63e-05	0.0179	0.00132	0.0101	0.0187	0	0.032	2.26e-18	5.21e-19	5.98e-18	0	0.0525	0.0516	0.00841	0.0341	0.0361	0.0701
TCGA-AO-A0J7-01	High	1.26412	0.000957	0	0	0.0165	2.16e-18	2.73e-20	0	0.00334	0.0046	5e-19	0.0244	0	1.2e-19	0	0	0.145	0.108	0	0.0147	0.00794	0.0227
TCGA-A7-A5ZX-01	High	1.26469	0	0	0	0.00628	4.08e-19	0	1.23e-19	0.0304	0.000859	0.000983	0.0142	0	0	0	1.26e-17	0.0331	0	4.12e-19	0.0102	0.107	0.117
TCGA-AR-A0TY-01	High	1.26559	0.0598	0.0173	1.13e-18	0.00426	0.0055	0.0348	0.0111	0.0556	0.0196	0.0128	0.03	0	0	6.25e-19	9.34e-19	0.12	0.205	0	0.0837	0.0278	0.111
TCGA-S3-AA15-01	Low	0.905391	0.522	2.56e-19	0.0468	2.76e-21	0.0791	0.14	0.0351	0.128	0.0352	0.0205	0.0679	0.0646	1.6e-18	0	5.39e-18	0.121	0.266	0	0.506	0.22	0.726
TCGA-OL-A5S0-01	High	1.26738	0.00633	0	1.2e-19	0.00467	0.0101	0.0129	0.0375	0.0636	0.0436	0.0429	0.031	0.0282	8.41e-20	7.75e-18	4.92e-19	0.127	0.261	1.41e-17	0.0838	0.0831	0.167
TCGA-LL-A5YO-01	Low	0.904645	0.486	0.0137	0.083	0.014	0.213	0.3	0.0817	0.00853	0.117	0.105	0.0567	0.0205	1.78e-18	0	0.0224	0.207	0.175	2.08e-19	0.624	0.00642	0.631
TCGA-PL-A8LY-01	Low	0.904523	0	7.04e-19	1.78e-18	0	0.00172	0.00478	0.00279	0.0373	0.00268	0.00953	0.0125	2.63e-18	0	1.06e-18	3.75e-19	0.138	0.00707	1.1e-17	0.00479	0.0365	0.0413
TCGA-AO-A12C-01	High	1.26755	6.2e-19	6.68e-19	1.49e-18	0.0103	5.61e-19	0.00568	1.43e-18	0.0723	0.00803	0	0.026	0	3.7e-21	0	0	0.033	0.00744	2.63e-20	0.0245	0.103	0.128
TCGA-E9-A1N5-01	Low	0.904482	2.3e-19	0.000989	0.00668	0.00836	0.0377	0.105	0.0104	0.052	0.0299	0.00749	0.041	0	8.78e-05	0	0	0.0806	0.0876	0	0.0707	0.0928	0.164
TCGA-AR-A250-01	High	1.26765	0.00787	0.0138	0	0.00443	0.0119	0.0326	0.00604	0.0447	0.0587	0.0365	0.0413	0.0125	0.000385	3.36e-18	4.98e-19	0.0119	0.182	0.0171	0.0811	0.052	0.133
TCGA-W8-A86G-01	Low	0.903085	2.93e-18	0	6.17e-18	7.39e-19	0	0	5.81e-19	0.0239	0	0	0.0107	3.98e-18	0	2.67e-18	2.13e-17	0.0349	1.29e-17	1.5e-17	0.00348	0.109	0.112
TCGA-AR-A24X-01	Low	0.901102	0.0228	0.0183	0	0.01	0.0277	0.0684	0.00285	0.0139	0.00102	2.84e-18	0.0196	0	0	2.58e-18	0	0.0363	0.0933	0.017	0.0519	0.0909	0.143
TCGA-D8-A1XU-01	High	1.26818	0.0242	0.00259	0	0.00163	0.00299	0.0224	0.00568	0.0119	0.0269	0.00381	0.0353	0.00761	0	2.65e-18	0.00209	0.0225	0.0189	0.0236	0.0553	0.0163	0.0716
TCGA-A2-A4RX-01	Low	0.900797	0.0806	0.00287	0.024	0.00741	0.0326	0.0633	0.0141	0.0431	0.000558	0.000724	0.0146	0.00189	0	1.62e-19	6.45e-18	0.0456	0.0645	0	0.0908	0.104	0.195
TCGA-A2-A3XV-01	High	1.26962	5e-20	1.75e-19	1.49e-18	0.0152	0.00845	0.0145	0.00268	0.0439	0.0433	0.0294	0.06	0.00476	0	4.92e-18	2.58e-17	0.182	0.0768	0	0.0436	0.0415	0.0851
TCGA-AR-A1AM-01	Low	0.899674	0	2.27e-20	0	0.00473	0.00531	0.0341	0.0066	0.0269	0.00999	0	0.0447	0	7.73e-19	0	0	0.0301	0.00767	2.35e-20	0.0203	0.0925	0.113
TCGA-AC-A23G-01	Low	0.898626	0	7.22e-20	0	0	0	0	0.0164	0.188	0.0517	0.0255	0.0551	0.0161	3.17e-20	2.24e-17	0	0.0494	0.0132	0	0.0616	0.2	0.262
TCGA-AN-A0XS-01	Low	0.897712	0.0852	5.05e-21	0.012	0.00546	0.0329	0.107	0.0152	0.0506	0.0334	0.00461	0.0673	0	0	3.22e-19	9.29e-19	0.065	0.0124	0.0164	0.121	0.173	0.294
TCGA-OL-A66L-01	Low	0.896258	2.86e-19	0	0	0.00169	5.56e-19	0.048	0.0261	0.131	0.0246	0.0149	0.082	0.00679	6.51e-21	8.04e-19	0	0.15	3.42e-18	0	0.0419	0.221	0.263
TCGA-AR-A2LM-01	Low	0.894597	6.12e-19	2.22e-22	5.23e-19	0.00792	0.0156	0.0533	0.00329	0.0251	0.00461	3.55e-18	0.0225	5.53e-19	6.26e-20	0	6.59e-19	0.00733	0.0209	0.00642	0.0403	0.105	0.146
TCGA-A7-A3IZ-01	High	1.27119	0	0	3.08e-18	0	0	0	0	0.0377	0.00553	0	0.0344	0	1.07e-18	4.85e-19	2.34e-18	0.102	0.0402	3.87e-20	0.0347	0.0189	0.0536
TCGA-AO-A0J5-01	High	1.27142	0	6.31e-19	6.66e-18	4.9e-05	0	0.00231	0	0.0641	0.00927	5.23e-18	0.0437	2.12e-18	0.00127	3.28e-18	0	0.0844	0.0438	0	0.0248	0.207	0.231
TCGA-5T-A9QA-01	Low	0.893245	0.000144	0	0	7.92e-19	4.82e-18	6.26e-18	7.11e-19	0.00474	0.011	0.00559	0.03	2.02e-19	2.12e-18	2.92e-17	7.14e-18	0.156	0.0468	6.67e-18	0.0171	0.00237	0.0195
TCGA-A2-A0CY-01	Low	0.892147	4.33e-20	0	0	0	0	0	1.38e-19	0.0124	0	0	0.00307	9.71e-19	0.00149	1.33e-19	7.41e-18	0.129	0.0664	6.36e-19	0.00367	0.00828	0.012
TCGA-A8-A07C-01	High	1.27343	0.0895	0.054	4.29e-18	0.00544	0.055	0.0905	0.0239	0.011	0.0316	0.0139	0.0517	0.00898	0.000957	2.85e-18	0	0.033	0.555	0.00147	0.151	0.00548	0.157
TCGA-A2-A0YC-01	High	1.27454	0.00652	4.44e-19	0	2.96e-21	1.46e-19	0.009	0.0131	0.0412	0.039	0.011	0.0564	0	1.43e-20	7.42e-18	0	0.0573	0.0473	0.00543	0.0538	0.069	0.123
TCGA-AN-A0XT-01	High	1.27495	1.13e-18	8.74e-19	1.77e-17	0	0	2.59e-20	5.53e-19	0.154	0	4.82e-19	0.0174	0	0	2.9e-18	8.43e-18	0.0307	7.57e-20	0	0.0142	0.124	0.138
TCGA-E9-A22H-01	Low	0.88996	0.00736	0	4.24e-18	0.00049	0	0.0292	2.18e-19	0.0277	0.0244	0.00588	0.0393	1.67e-17	0	8.47e-18	4.11e-18	0.0347	0.185	0	0.0355	0.0138	0.0493
TCGA-EW-A1IY-01	Low	0.889084	0.0573	0.0683	0.0031	0.00556	0.0912	0.196	0.0503	0.0161	0.0341	0.00344	0.0454	0.00744	0	4.06e-19	9.28e-18	9.05e-19	0.36	0.0192	0.189	0.0221	0.211
TCGA-E9-A1R5-01	High	1.27714	1.64e-20	1.45e-18	2.23e-18	0.00488	0	0.00094	0	0.0176	0.00482	0	0.0257	3.37e-18	0	0	0	0.0432	0.0259	0.0101	0.0144	0.071	0.0854
TCGA-AO-A0J8-01	Low	0.888679	0.014	8.26e-22	9.64e-19	0.00513	0	0.0341	0.0129	0.00903	0.0502	0.0126	0.0595	1.57e-18	1.88e-19	2.38e-18	1.84e-18	0.0716	0.0226	0.0237	0.0653	0.0412	0.107
TCGA-BH-A0H7-01	High	1.2785	5.94e-21	0	0	2.07e-19	0.00176	0.0241	0.00365	0.025	0.0222	0.00688	0.0485	3.37e-18	0	2.32e-19	0	0.0355	0.118	1.38e-18	0.0242	0.0478	0.0719
TCGA-E2-A15K-01	Low	0.888152	0.119	0.0113	0.00311	0.0109	0.0475	0.138	0.0312	0.0269	0.0347	0.0143	0.0356	0.00823	0	0	1.09e-18	0.173	0.0941	0	0.174	0.0346	0.208
TCGA-D8-A143-01	High	1.2788	0.054	1.22e-20	0	0	6.61e-19	0.00788	0.0199	0.0282	0.00362	8.89e-05	0.0209	3.72e-18	8.26e-20	1.37e-18	0	0.208	0.166	1.39e-17	0.054	0.0157	0.0698
TCGA-A2-A0CT-01	High	1.28169	6.09e-18	0	0	0.0101	0	0.00771	0	0.0281	0.0158	0.00118	0.0351	5.96e-19	0.00025	0	0	0.072	0.118	1.19e-17	0.0265	0.0316	0.0582
TCGA-A2-A0CM-01	Low	0.886901	0.0815	0.0317	1.07e-19	0.0293	0.0991	0.138	0.0194	0.0229	0.0802	0.0791	0.0451	0.0241	1.08e-20	2.95e-18	6.95e-18	0.132	0.587	0.01	0.219	0.0223	0.242
TCGA-D8-A1XV-01	High	1.28274	0.0114	0.0112	0	0.0103	0.00917	0.0031	3.08e-20	0.00795	0.0232	2.79e-19	0.0289	1.28e-18	2.48e-19	8.5e-18	0	0.0499	0.0845	0.00396	0.0444	0.00398	0.0483
TCGA-B6-A0IE-01	High	1.28389	0.0326	0	2.81e-18	0	0	0.00482	0.00252	0.0434	0	3.6e-19	0.0228	0	0	0	0	0.13	0.0704	0	0.0316	0.059	0.0906
TCGA-EW-A1J5-01	Low	0.886777	0.0696	0.0178	0	0.00698	0.0621	0.127	0.0149	0.0178	0.0393	0.0315	0.0577	8.51e-19	0	0	0.00113	0.055	0.0922	0.0241	0.148	0.0089	0.156
TCGA-A1-A0SO-01	Low	0.886756	0.0495	0.01	0	0.0149	0	5.75e-19	4.45e-21	0.00425	0.00638	5.1e-21	0.0235	1.63e-18	1.16e-18	0	0	0.132	0.31	0	0.046	0.00213	0.0482
TCGA-EW-A1P6-01	High	1.28417	0.0247	0.00181	1.25e-18	0.00783	0	0.00692	0.0036	0.000216	0.0146	0	0.0418	1.31e-19	1.89e-19	0	0	0.108	0.0406	5.42e-19	0.0461	0.0499	0.096
TCGA-AO-A12D-01	Low	0.885586	0.0614	0.0117	0.0337	4.64e-19	0.0422	0.0683	0.025	0.0262	0.0493	0.0424	0.0387	0.00769	0	3.16e-18	0	0.0432	0.103	0.0333	0.136	0.0238	0.16
TCGA-BH-A0BW-01	High	1.28465	0.155	0.0317	0.00139	0	0.0348	0.0971	0.0119	0.00212	0.0776	0.0825	0.0303	0.0252	2.49e-19	0.0272	0	0	0.45	0.0171	0.23	0.00106	0.231
TCGA-A2-A25C-01	Low	0.885427	0.0333	0.0157	3.08e-19	0.00451	0.0173	0.053	0.0148	0.0298	0.0201	0.00836	0.0267	9.45e-05	9.14e-21	3.79e-18	0.00638	0.0215	0.149	6.01e-19	0.0714	0.0564	0.128
TCGA-A2-A0YK-01	Low	0.885163	0.191	0.0313	0.0489	0.0167	0.16	0.248	0.0311	0.125	0.00371	2.92e-21	0.0279	0.011	6.45e-20	9.06e-18	2.86e-20	0	0.0475	0	0.276	0.229	0.505
TCGA-BH-A42U-01	Low	0.881928	0.0521	0	0.00206	0.00289	3.6e-19	0.0473	0.0169	0.139	4.48e-18	0.00298	0.0311	0	0	0	0	0.0667	1.41e-18	2.02e-18	0.046	0.212	0.258
TCGA-C8-A27B-01	Low	0.880334	0.0707	0.0183	9.45e-18	0.0166	0.0849	0.138	0.0326	0	0.0638	0.0547	0.0181	0.0485	0.0138	1.76e-17	0	0.0154	0.493	2.47e-18	0.225	0.00108	0.226
TCGA-EW-A1J1-01	Low	0.877526	0.0702	0.0154	1.75e-18	0.0166	0.0634	0.116	0.0131	0.00537	0.0366	0.0255	0.0276	0.00829	0	1.37e-18	0.0047	0.0586	0.0656	0.0303	0.149	0.00268	0.152
TCGA-OL-A5DA-01	Low	0.877508	3.25e-19	1.77e-18	0	0.0205	0.0186	0.0679	0	0.0205	1.12e-18	5.59e-19	0.0155	1.95e-17	0	5.65e-19	6.29e-18	0.0893	0.0217	0	0.0205	0.0233	0.0439
TCGA-A7-A4SB-01	Low	0.876813	0	4.28e-19	0	0.0027	3.88e-18	5.09e-18	0	0.0957	0	2.38e-18	0.0252	9.47e-18	0	0	3.31e-18	0.0435	0.0437	0	0.00885	0.13	0.138
TCGA-BH-A1F5-01	High	1.28563	0.0065	0.00551	0	0.0111	0	0.023	0.00112	3.53e-19	0.0139	0	0.0269	0	0.0012	0	0	0	0.126	0	0.0439	0.0398	0.0837
TCGA-A2-A0YL-01	Low	0.876471	0	0.00145	0.00655	0.00124	0.0227	0.0593	0.00918	0.0752	0.00395	2.87e-19	0.0202	5.49e-18	0	7.71e-18	4.72e-18	0.0203	0.0795	0.00292	0.0334	0.106	0.139
TCGA-BH-A0EB-01	Low	0.87554	0.0393	0.0133	0.00848	0.00649	0.0352	0.0782	0.013	0.0738	0.0732	0.0267	0.0581	0.0169	0	9.23e-19	2.69e-18	0.0507	0.0551	0.00129	0.131	0.0551	0.186
TCGA-A8-A07Z-01	Low	0.874536	0.0177	0	0	0	2.27e-18	0.000786	0.00968	0.0338	0.0342	0.0288	0.0299	8.83e-20	0	2.23e-19	8.12e-18	0.155	0.0894	0	0.0472	0.0333	0.0806
TCGA-B6-A0X7-01	Low	0.873076	0	2.25e-19	0	0.00884	0	4.67e-21	0	0.0887	0	9.5e-18	0.0263	0	6.11e-19	0	9.26e-20	0.0465	9.58e-20	0	0.0126	0.198	0.211
TCGA-B6-A0RV-01	Low	0.872584	0.000586	0.00915	0	0	0.0129	0.0724	0.0109	0.0591	0.0163	0.00446	0.019	0	2.28e-19	1.25e-18	0	0.0493	0.0864	0	0.0312	0.0808	0.112
TCGA-EW-A1PF-01	Low	0.871597	0.013	0.000192	0	0	6.09e-20	0.0146	0.00598	0.0972	0.0232	0.0097	0.0432	0	5.17e-20	9.37e-18	2.68e-18	0.0201	0.0426	0.00468	0.0354	0.073	0.108
TCGA-AN-A04C-01	Low	0.869959	0	6.31e-20	5.23e-18	0	3.57e-18	2.74e-21	0.0136	0.0442	0.0149	0.012	0.0375	6.61e-18	2.35e-20	0	0	0.138	0.156	2.4e-18	0.0248	0.0236	0.0484
TCGA-BH-A0E0-01	High	1.28566	0	9.34e-21	0	0.0104	0	0	0.105	0.0172	0.023	0.0085	0.0455	8.82e-19	0.00205	7.19e-18	0	0.141	0.184	0.00246	0.0886	0.0271	0.116
TCGA-AR-A0TQ-01	High	1.28686	0.0605	0.0224	0.00115	0.00911	0.0508	0.116	0.025	0.041	0.0457	0.0293	0.0436	0.00821	0	0	0	0.111	0.28	0	0.135	0.0251	0.16
TCGA-BH-A0B5-01	Low	0.869116	0.00379	0.000159	0	0.00167	0.000651	0.0279	0.0167	0.0166	0.022	0.00721	0.0426	1.06e-20	0	0	0	0.0557	0.129	0.0131	0.0447	0.0774	0.122
TCGA-AR-A5QP-01	High	1.28931	0	2.7e-19	0	0.00589	0	0.0185	0.0108	0.0305	0.00266	0	0.0251	2.43e-18	6.46e-19	5.01e-18	0	0.0718	0.0394	0	0.0103	0.113	0.124
TCGA-GM-A5PV-01	Low	0.868819	1.17e-18	0	9.08e-18	0.00627	1.12e-18	0.0285	0.0095	0.0188	0.0388	0.0173	0.039	1.29e-18	2.89e-18	0	1.13e-17	0.0837	0.00847	0	0.0385	0.0271	0.0656
TCGA-EW-A424-01	Low	0.868085	0	0	3.78e-19	0	0	4.07e-18	0	0.0358	0	0	0.00762	0	0	9.38e-19	0	0.103	0.00468	0	0.0072	0.111	0.119
TCGA-E2-A15P-01	High	1.29089	3.49e-19	0	9.06e-19	0.00619	0.000804	0.0115	0.00404	0.0624	0.00712	1.93e-18	0.0291	1.3e-18	2.57e-19	0	0	0.0283	0.0212	8.82e-19	0.0231	0.0645	0.0877
TCGA-EW-A1PE-01	Low	0.86728	0.0464	0.00588	0.0043	1.51e-19	0.0257	0.0794	0.00734	0.0701	0.0884	0.073	0.0534	0.0189	0	0	0	0.0673	0.0284	0.0159	0.137	0.0377	0.174
TCGA-BH-A6R8-01	Low	0.866826	0.02	0	5.33e-19	0	3.47e-19	0.0299	0.00549	0.00692	0.0571	0.0582	0.048	0	1.83e-18	0	8.15e-18	0.163	0	3.02e-20	0.0635	0.0333	0.0969
TCGA-C8-A26Y-01	Low	0.866628	0.0352	0	0.001	0.000143	1.59e-19	0.0107	0.0177	0.0106	0.0383	0.023	0.0588	0.00568	5.43e-19	2.35e-18	0.000182	0.0597	0.121	0.00379	0.0686	0.0087	0.0773
TCGA-D8-A1X8-01	High	1.29131	1.16e-18	0.00469	1.24e-18	0	7.15e-19	0.0313	0.0107	0.0832	0.0419	0.016	0.0474	0.00144	0.000561	5.85e-18	1.08e-17	0.0175	0.0803	0	0.055	0.0858	0.141
TCGA-A8-A06Y-01	High	1.29157	0	0	1.73e-18	0.000732	0.0028	0.00239	1.46e-19	0.0401	0.0103	0	0.0119	0	1.21e-19	4.61e-18	4.43e-18	0.104	5.1e-19	1.12e-18	0.0155	0.0201	0.0356
TCGA-AR-A1AN-01	High	1.29358	1.16e-18	0	3.98e-18	0.00346	7.7e-19	0.0122	0.0123	0.0622	0.0213	0	0.0539	9.41e-18	0	0	0	0.0277	0.0559	2.02e-18	0.037	0.234	0.271
TCGA-A7-A4SC-01	Low	0.866565	7.45e-19	4.97e-21	0	2.15e-21	0.0213	0.0503	0.00514	0.104	0.00326	0	0.0442	0.0015	0	1.91e-18	0	0.0276	0.00842	0.00322	0.0276	0.193	0.221
TCGA-C8-A138-01	Low	0.866401	0.073	6.09e-20	0	0.0314	0.118	0.204	0.0442	0.0762	0.0432	0.0365	0.053	0.000163	0	0	0	0.211	0.129	0	0.194	0.0853	0.279
TCGA-EW-A423-01	Low	0.865473	0.00618	5.28e-19	0	0.00201	0.00311	0.0252	0.00107	0.0325	0.0414	0.0164	0.0606	3.19e-18	0	0	1.61e-17	0.141	1.02e-18	0	0.0399	0.025	0.0648
TCGA-E9-A247-01	High	1.29463	0	0	5.06e-19	0.0108	2.42e-18	2.91e-18	0	0.0128	0.00217	0	0.0247	0	3.28e-19	7.13e-18	3.48e-18	0.158	0.0967	2.98e-18	0.0106	0.0471	0.0577
TCGA-S3-AA17-01	Low	0.865321	0.246	0.039	0.0319	0.00119	0.102	0.218	0.0313	0.0294	0.0596	0.055	0.0228	0.00684	4.89e-18	0	0	0.193	0.108	0.057	0.306	0.0235	0.33
TCGA-A8-A0A7-01	Low	0.864493	0.329	0.0787	0.0441	0.0297	0.274	0.427	0.0323	0.0205	0.155	0.114	0.0776	0.0425	1.13e-18	9.17e-20	0.0151	0.0488	0.357	1.04e-18	0.573	0.0697	0.643
TCGA-BH-A0HN-01	Low	0.863975	0	0	0	2.11e-18	0	0	3.52e-19	0.00988	0.0358	0.00641	0.033	0.00859	0.000307	1.04e-18	0	0.124	0	0	0.035	0.00494	0.04
TCGA-BH-A0EA-01	Low	0.863539	1.32e-18	3.69e-18	0	0.000956	0	0.00303	0.0152	0.135	0.0031	0	0.0435	0	0	1.73e-17	0	0.0225	0	0	0.0136	0.284	0.297
TCGA-A8-A06O-01	High	1.29479	0.0116	0	0	0.000482	2.25e-18	0.0188	0.00558	0.0188	0.0326	0.00531	0.0812	0	0	0	0	0.0844	0.134	3.44e-18	0.05	0.0908	0.141
TCGA-AC-A3TM-01	Low	0.863522	0	0	0	1.17e-20	2.96e-19	0.0331	0.00306	0.00868	0.0204	0.0221	0.038	1.42e-18	0	1.52e-17	3.73e-17	0.226	0.0636	0	0.0195	0.0356	0.0551
TCGA-D8-A1XF-01	Low	0.860885	0.0427	0.00183	0	0.00877	0.0246	2.11e-20	0.0107	0.0117	0.00594	0.00068	0.0178	0	3.72e-20	3.68e-18	0.0064	0.117	0.127	0	0.0853	0.00587	0.0911
TCGA-BH-A0DE-01	Low	0.860721	0	0	8.28e-19	0.00793	1.46e-18	0.0177	0.00537	0.173	0.0218	0	0.0754	0.000367	0.00181	1.04e-17	2.15e-19	0.0248	0.0236	0	0.0263	0.272	0.298
TCGA-BH-A18G-01	High	1.29491	0	0	7.61e-18	4e-19	0	0	0	1.03e-19	0.0168	0.00965	0.0245	5.81e-19	0	3.31e-18	0	0.16	0.143	0	0.0113	0.0185	0.0298
TCGA-E2-A15M-01	High	1.2955	0.0615	0.0738	0.0119	0.0132	0.1	0.162	0.0317	0.113	0.0547	0.0149	0.0821	0.0258	1.65e-20	8.01e-18	0.0124	0	0.219	0	0.202	0.228	0.43
TCGA-E2-A574-01	High	1.29563	0	0	0	0.00768	1.32e-19	2.15e-18	1.18e-19	0	0	0	0.00831	0	6.63e-21	4.17e-18	1.02e-18	0.162	0.255	8.48e-18	3.23e-18	0.0161	0.0161
TCGA-C8-A12W-01	High	1.29582	0.0436	1.56e-20	6.56e-18	0.00343	0.0056	0.00753	0.000943	0.0261	0.0552	0.0313	0.0609	0	0	0	1.64e-18	0.128	0.0979	0	0.0874	0.0251	0.112
TCGA-C8-A130-01	High	1.29673	0	0	0	0.0157	0	0.0173	0	0.111	0.00973	0.00307	0.0355	5.13e-18	2.06e-18	6.17e-18	2.23e-17	0.13	0.171	0	0.0181	0.0935	0.112
TCGA-E2-A14Y-01	Low	0.860689	1.63e-18	0	1.6e-17	7.53e-19	2.13e-18	0	0	0.0153	0.0053	0.00382	0.0228	3.85e-20	0.00346	0	2.46e-18	0.0665	0.433	6.79e-18	0.00584	0.00839	0.0142
TCGA-AR-A24H-01	High	1.29903	0.0337	0.0223	0	0.0241	0.00359	0.032	0.00252	0.00166	0.0434	0.018	0.0547	0	0	4.12e-17	0	0.0978	0.271	0.00688	0.0742	0.00083	0.0751
TCGA-E9-A5UO-01	Low	0.858165	0.00741	1.05e-20	0	0.00351	0	0	3.47e-19	0.0382	0.0131	8.74e-19	0.0235	2.63e-18	0	3.11e-18	0	0.121	0.0352	8.22e-18	0.0169	0.0191	0.0361
TCGA-AQ-A54N-01	Low	0.858043	0	0	0	0.00376	0.0098	0.00337	0	0	0.0115	0.00551	0.0252	6.17e-19	6.4e-05	0	0	0.17	0.205	3.29e-18	0.0142	0.00176	0.016
TCGA-BH-A18F-01	Low	0.857976	0	0.00204	0	3.1e-18	0	0.0395	0.00801	0.0782	1.98e-20	5.3e-18	0.032	0	0	7.6e-19	0	0.0418	0.172	0	0.0134	0.249	0.263
TCGA-BH-A0E9-01	Low	0.857028	7.4e-19	0	0	0	0	0.0371	0.00924	0.0888	0	0	0.0188	2.72e-18	5.99e-19	2.74e-18	2.41e-18	0.0299	0.0105	0	0.0117	0.0895	0.101
TCGA-AN-A0AT-01	Low	0.856841	0.0471	0.0186	1.53e-19	0.0166	0.0286	0.0432	0.022	0	0.0301	0.0262	0.0146	0.00111	0	0	1.31e-18	0.117	0.468	0	0.0958	0.00653	0.102
TCGA-A1-A0SH-01	High	1.30214	0	5.19e-21	0	0.0046	3.08e-20	0.0127	0	0.0182	0.0251	0.00777	0.0335	0.0129	0.000667	4.81e-18	0	0.019	0.0351	4.61e-19	0.0483	0.118	0.166
TCGA-AN-A0AL-01	High	1.30219	0.182	0.00526	4.31e-21	0	0	0.0541	0.015	0.105	0.0476	0.0597	0.0352	0.00355	2.56e-19	0	0	0.0754	0.224	4.63e-18	0.167	0.085	0.252
TCGA-LL-A740-01	High	1.30291	3.06e-18	1.47e-18	6.5e-19	0	0	0	0.0255	0.0765	0.0534	0.0368	0.04	2.76e-18	3.23e-19	7.69e-18	0	0.0367	0.0356	0.00295	0.0526	0.0685	0.121
TCGA-AO-A0JL-01	Low	0.856463	0	0	5.46e-18	1.79e-18	4.75e-18	4.08e-18	1.64e-20	0.142	0	1.9e-19	0.0116	0	0	0	4.69e-18	0.148	0.11	0	0.00208	0.0903	0.0924
TCGA-AR-A0TR-01	Low	0.855304	0.0716	0.0109	0	0	0.0365	0.0336	0.0111	0	0.0058	0	0.0235	0	0	2.56e-17	0.00279	0.059	0.0191	0	0.103	0.0124	0.115
TCGA-AN-A0XN-01	High	1.30354	0	0.00614	0	0.00342	0	0.00191	0.00335	0.0622	0.0894	0.0412	0.0653	0.0447	0	4.75e-18	5.31e-18	0.00228	0.107	0.00614	0.103	0.127	0.23
TCGA-BH-A1EX-01	High	1.30491	0.0207	0.0106	1.81e-18	0.00351	0.0198	0.035	0.0141	0.00858	0.0582	0.0119	0.0731	0.0232	0	0	8.24e-19	0.015	0.041	0.00976	0.0941	0.0401	0.134
TCGA-D8-A1X6-01	High	1.30754	0.0375	0.00415	0	0.00745	5.42e-19	0.0122	0.000834	0.00543	0.0802	0.0279	0.0613	0.0292	0	8.69e-18	0	0.106	0.0775	0	0.111	0.011	0.122
TCGA-OL-A5D6-01	Low	0.850709	0	0	2.97e-18	0.00204	4.73e-18	0.00168	0.0087	0.0919	0.0453	0.0349	0.0471	1.08e-19	1.71e-19	5.19e-18	0	0.0615	0.00267	5.76e-19	0.042	0.0771	0.119
TCGA-BH-A0DQ-01	High	1.30755	5.5e-19	7.54e-19	1.03e-18	0	1.59e-18	0	0.00486	0.139	0.0168	0.00276	0.0623	3.64e-18	0.000375	5.69e-18	1.06e-18	0.0337	0.0652	3.33e-18	0.0255	0.25	0.276
TCGA-AO-A12F-01	High	1.30772	2.51e-18	0	8.46e-18	0.00531	0	8.78e-19	1.4e-19	0.14	0.009	2.32e-18	0.0315	0	0.00508	8.62e-18	1.16e-18	0.108	0.247	0	0.0141	0.156	0.17
TCGA-AC-A4ZE-01	Low	0.850366	1.53e-18	5.91e-20	5.28e-18	0.00783	0.0133	0.0408	6.03e-19	0.0945	0.00155	2.28e-18	0.0333	9.4e-20	0.00127	3.66e-18	0	0.0655	0.0768	0	0.0307	0.185	0.216
TCGA-BH-A18M-01	High	1.30879	0	0.00193	2.8e-18	0.00169	0	0.0103	0.00265	0.0586	0.00779	0	0.0319	0	0	3.46e-18	0	0.0401	0.0621	0	0.0205	0.164	0.184
TCGA-A2-A3XU-01	High	1.30912	2.35e-19	9.97e-20	0	1.75e-18	2.21e-18	2.92e-17	0	0.00261	1.15e-19	0.00173	0.0137	1.53e-17	3.41e-20	1.22e-18	1.86e-18	0.192	0.238	2.67e-17	0.00339	0.00218	0.00557
TCGA-AQ-A1H3-01	Low	0.849338	0	0.00705	0.00644	0.00466	0.0149	0.0686	0.0181	0.0541	0.00942	2.83e-18	0.0412	0	6.43e-20	8.19e-18	6.25e-18	0.0165	0.0854	0.00724	0.0396	0.188	0.228
TCGA-D8-A1JB-01	Low	0.84909	0.165	0.0277	0.0258	0.0241	0.183	0.259	0.0205	0.0488	0.0295	0.0149	0.0314	0.0203	0	0	0.00475	0.0183	0.063	4.64e-19	0.294	0.0463	0.341
TCGA-BH-A0DL-01	Low	0.847841	0.086	0.00695	7.28e-20	0.0169	0.0172	0.0594	0.0756	5.52e-21	0.118	0.0846	0.0514	0.0551	3.55e-19	2.49e-18	0.0108	0.0699	0.225	0.0144	0.241	5.81e-20	0.241
TCGA-BH-A0BD-01	Low	0.846615	0.0153	0	0	8.06e-20	5.79e-19	0.0129	0.0129	0.0453	0.0287	0.0216	0.0545	0	0	0	0	0.0497	0.184	5.67e-18	0.0583	0.119	0.177
TCGA-A2-A0EN-01	Low	0.846538	0.06	0.0104	0.0392	0.00238	0.0892	0.187	0.0437	0.138	0.0585	0.0125	0.0904	0.0272	0	7.74e-18	0	0.0437	0.0432	0	0.195	0.283	0.478
TCGA-A2-A0YF-01	High	1.3094	0.0288	0.00629	0	0.00169	0	0.0174	0.00356	0.0507	0.0751	0.027	0.0552	0.00395	0.00275	1.18e-17	1.72e-18	0.0314	0.127	1.37e-19	0.0915	0.0403	0.132
TCGA-A7-A0CE-01	High	1.31136	0	0	2.25e-17	0.00275	2.74e-18	0	0.00487	0.0277	0.00685	0.00294	0.0278	4.74e-19	0.00185	0	0	0.102	0.215	1.04e-17	0.0121	0.0295	0.0415
TCGA-A8-A09E-01	High	1.31185	0.00176	0	0	0	2.9e-19	0	0.00614	0.0168	0.00471	0	0.032	0	4.68e-19	1.52e-18	4.29e-19	0.0977	0.0631	0	0.0155	0.0358	0.0513
TCGA-AN-A0XR-01	Low	0.845317	0	0	0	1.88e-18	1.18e-18	0	0	0.00281	0.00835	0.000824	0.0224	1.55e-17	6.83e-19	0	6.04e-18	0.111	0.0996	6.16e-18	0.0107	0.013	0.0236
TCGA-AR-A0TV-01	Low	0.844521	0.0672	0.0171	0.00317	0.0056	0.0547	0.0881	0.0282	0.0155	0.0796	0.0369	0.0426	0.0146	0	6.29e-18	0.0102	0.12	0.151	0.00989	0.17	0.00773	0.178
TCGA-A1-A0SN-01	Low	0.844502	0.0124	0.00912	4.65e-19	0	0.0108	0.0678	0.0108	0.0309	0.027	0.0088	0.0491	7.4e-18	1.41e-19	4.19e-19	1.39e-18	0.0418	0.179	0.00547	0.0461	0.0159	0.0619
TCGA-BH-A0DK-01	Low	0.844378	0.0606	0.00713	0.0329	0	0.0902	0.212	0.0202	0.139	0.0322	0.0354	0.0294	0	0	5.64e-18	0	0.0717	0.163	0	0.141	0.169	0.31
TCGA-E2-A2P6-01	Low	0.842728	2.15e-19	0	0	0	0	1.36e-18	0.000131	0.0465	0.0129	0.00356	0.0453	4.92e-18	0	2.43e-19	1.9e-18	0.0759	0.00944	1.81e-18	0.0276	0.0776	0.105
TCGA-A2-A04T-01	Low	0.841696	0.027	0.0143	2.53e-19	0.0129	0.104	0.126	0.0604	0.00131	0.0365	0.0263	0.0376	0.00788	9.17e-21	1.19e-18	0	0.141	0.343	0.00397	0.16	0.00867	0.169
TCGA-EW-A3U0-01	Low	0.840173	0.262	0.00451	0.0952	0.0191	0.174	0.231	0.0502	0.0656	0.101	0.0706	0.077	0.0429	4.2e-19	1.82e-18	8.35e-18	0.154	0.223	0	0.421	0.147	0.567
TCGA-AN-A04A-01	High	1.31195	0	0	9.57e-18	0.00148	3.8e-18	2.49e-19	0	0.0481	0.0126	0.00698	0.0202	1.04e-18	1.38e-18	7.28e-18	0	0.0754	0.0781	0	0.0148	0.0612	0.076
TCGA-BH-A0AW-01	Low	0.840062	0.0456	0.0465	0.045	0.00645	0.106	0.252	0.0486	0.101	0.0976	0.0737	0.0682	0.0217	0	0.00413	0.00206	0.109	0.209	0.0115	0.24	0.0708	0.311
TCGA-AO-A12E-01	High	1.31243	0	0	0	0	7.01e-18	0	0	0.0598	0.0372	0.00426	0.0716	0	0.00354	4.25e-19	0	0.0834	0.00973	0	0.0451	0.183	0.228
TCGA-EW-A1OZ-01	High	1.31308	0.019	3.69e-20	0	0.00558	0	4.14e-19	0.0212	0.0405	0.0438	0.0274	0.0522	0.00979	0	0	0	0.206	0.0625	0.00222	0.0736	0.0365	0.11
TCGA-E9-A1RH-01	High	1.31373	0.00731	0.0124	1.31e-18	0.0092	0	0.00266	0.00628	0	0.0162	0.00248	0.0143	0.0195	0	2.97e-19	4.02e-19	0.00725	0.287	1.47e-18	0.0478	0.0174	0.0652
TCGA-A1-A0SP-01	High	1.31409	0.0609	0	0	0	8.03e-18	0.0247	0.068	0.0171	0.0472	0.0198	0.0311	0.00598	6.14e-19	0	6.93e-18	0.087	0.365	2.51e-17	0.124	0.0143	0.138
TCGA-A2-A0YH-01	High	1.31498	0.0496	0.0124	0	0.00438	0.0213	0.0748	0.0099	0.0124	0.144	0.111	0.0767	0.0374	0	0	0	0.149	0.0992	0.0131	0.191	0.0176	0.208
TCGA-AR-A256-01	High	1.31506	0.0296	0.0161	0	0.00478	0.000561	0.0375	0.0121	1.35e-19	0.0263	0.0151	0.0247	0.00908	0.00402	2.35e-19	0	0.0753	0.425	6.53e-18	0.0627	5.17e-18	0.0627
TCGA-OL-A5RY-01	Low	0.838612	0.341	0.0161	0.033	0.00319	0.0781	0.177	0.125	0.0803	0.0454	0.0381	0.0515	0.0279	0	0	0	0.0146	0.249	1.69e-17	0.415	0.164	0.579
TCGA-A2-A0YI-01	Low	0.83834	0.0789	0.0215	7.72e-19	0.0048	0.0715	0.148	0.0158	0.0531	0.0668	0.0222	0.0592	0.026	3.37e-20	7.08e-18	0.00347	0.00849	0.035	0.00189	0.193	0.0583	0.251
TCGA-E2-A154-01	High	1.31548	0	0	1.19e-18	0.00655	0	0.00785	4.43e-21	0.00327	0.00854	2.37e-19	0.0201	0	1.76e-19	3.97e-19	0	0.0988	0.0236	0.00218	0.0148	0.0397	0.0545
TCGA-AC-A23E-01	High	1.31637	2.11e-18	0	0	0.00283	0	0.0027	0.00216	0.0398	0.0509	0.0196	0.0409	0.0369	0.00151	5.42e-18	7.15e-18	0.0377	0.0281	3.01e-22	0.0763	0.0702	0.146
TCGA-E9-A1RB-01	High	1.31649	0.0075	0	0	0.000378	0	0	4.32e-20	0.00326	0.0258	0.00971	0.0311	6.53e-05	0	0	0	0.0682	0.265	2.36e-19	0.0288	0.0307	0.0595
TCGA-AR-A0TX-01	High	1.31691	0.085	0.0192	0.00456	0.00479	0.0462	0.143	0.0508	0.0427	0.0619	0.0402	0.0645	0.00345	0	2.87e-18	7.87e-19	0.0772	0.165	0.0155	0.171	0.108	0.28
TCGA-B6-A0I6-01	High	1.31911	0	1.22e-20	0	0.0057	1.89e-19	0.000903	0.000425	0.00439	0.00457	0.0048	0.0101	0	0	0	0	0.122	0.106	0.00771	0.00677	0.0467	0.0535
TCGA-GM-A2DI-01	Low	0.837643	0.164	0.0872	0.112	0.0174	0.219	0.384	0.0547	0.0709	0.0438	0.0268	0.0371	0.0419	0	0	0.0156	0.0136	0.115	0	0.383	0.127	0.511
TCGA-E9-A1RE-01	High	1.31962	0.0212	0.0103	0.00721	0.0155	0.0221	0.0302	0.000338	0.0142	0.00455	0	0.0283	0	0	2.89e-18	6.85e-18	0.11	0.121	0.00271	0.0539	0.0426	0.0965
TCGA-BH-A1FU-01	High	1.31966	0.022	0.0118	0	0.00176	0.0252	0.0448	0.0205	0.11	0.00491	0.000332	0.0252	4.41e-19	0	5.24e-19	9.61e-18	0.03	0.187	0	0.0558	0.0978	0.154
TCGA-D8-A1Y3-01	High	1.32271	0.0403	0.00978	2.49e-19	0.0089	5.38e-20	0.0213	0.008	0.0129	0.101	0.104	0.0873	0.00532	0	0	1.28e-18	0.292	0.146	3.02e-18	0.122	0.00643	0.129
TCGA-A2-A1FZ-01	High	1.32353	1.94e-19	0.000323	2.18e-18	0	2.59e-18	0.0188	0.0102	0.0634	0.0464	0.00473	0.078	0.0148	0.000423	2.9e-18	1.94e-18	0.0328	0.0193	0	0.061	0.176	0.237
TCGA-A8-A09R-01	Low	0.837455	0.0238	0.00596	0	0.00908	0.0103	0.0341	0.00711	0.014	0.0619	0.0298	0.0436	0.0331	1.57e-19	0.00254	0.0126	0.0395	0.0623	0.0081	0.101	0.00701	0.108
TCGA-AN-A0G0-01	High	1.32429	0.0122	0.00393	0	0.00219	2.41e-20	0.00411	0.00524	0.0107	0.0203	0.0142	0.0254	0.00913	0.00131	9.78e-20	6.26e-19	0.0932	0.347	0	0.036	0.0265	0.0625
TCGA-AO-A12G-01	High	1.32475	0	5.54e-19	1.69e-17	0	3.02e-18	0.0225	0.0045	0.124	0.0189	0.00289	0.0456	1.86e-18	0	4.11e-18	0	0.0669	0.0305	0	0.0242	0.0795	0.104
TCGA-AR-A1AR-01	High	1.32493	0.086	0.0621	0.00791	0.00871	0.0612	0.101	0.0654	0.0443	0.101	0.0525	0.0609	0.0922	0	0.0119	1.38e-17	6.38e-18	0.632	0	0.309	0.116	0.425
TCGA-BH-A0H9-01	High	1.32611	0	0.00593	1.72e-19	0	0.00191	0.0225	0.00153	0.0187	0.00479	0	0.0377	0	0	9.54e-19	5.23e-19	0.0605	0.105	0	0.0106	0.101	0.112
TCGA-LL-A5YP-01	High	1.3279	0	0	0	0	0	1.34e-17	0.0388	0.0451	0.037	0.0342	0.0465	0.0205	4.29e-21	0	1.26e-18	0.0991	0.273	0	0.0649	0.102	0.167
TCGA-A8-A086-01	High	1.32886	7.3e-20	2.01e-19	0	0.00315	1.39e-19	4.24e-19	7.25e-19	0.0173	0.0223	0.00393	0.0319	0.00352	0.00047	3.6e-18	0	0.0663	0.106	0	0.0297	0.0284	0.0581
TCGA-LL-A7T0-01	High	1.32892	0.0403	0	0	0.0151	0.0107	0.0355	0.0133	0.00904	0.0241	0.0192	0.0232	3.32e-18	1.59e-18	0	5.74e-18	0.185	0.158	6.46e-18	0.0616	0.0349	0.0965
TCGA-AR-A254-01	High	1.33058	0.0524	0.0186	2.33e-19	1.23e-19	0.0142	0.0553	0.0232	0.018	0.12	0.072	0.0597	0.0397	5.94e-20	0	0	0.0497	0.247	0.000315	0.182	0.0397	0.222
TCGA-A8-A0AB-01	High	1.33093	0	0.000699	2.33e-18	4e-21	0	4.01e-05	0	0.00651	0	3.07e-18	0.0204	0	0	5.82e-18	7.55e-18	0.0575	0.0815	3.78e-18	0.0168	0.0131	0.0299
TCGA-AR-A1AS-01	High	1.33109	0.00941	0	0	0	0	4.8e-18	0	0	0.0298	1.33e-19	0.0484	0.013	0	0	3.74e-18	0.104	0.0552	0	0.0447	0.00129	0.046
TCGA-AN-A0FW-01	High	1.33329	3.44e-20	1.45e-19	1.09e-18	0.00641	0	0.0285	0.0109	0.0725	0.0048	2.91e-20	0.0395	0	2.45e-18	7.18e-18	1.09e-17	0.0854	0.139	7.99e-18	0.0206	0.135	0.156
TCGA-BH-A0B0-01	Low	0.837105	3.23e-19	0	0.00854	0.00548	0.0296	0.107	0.0348	0.108	0.0224	0.00262	0.0622	0.00788	0.000998	3.48e-18	0	0.0495	0.0308	0.000961	0.0682	0.252	0.32
TCGA-AC-A2FM-01	High	1.33412	0	1.62e-18	2.55e-18	0.0128	7.54e-18	0	0	0.0787	0.00146	1.32e-18	0.0332	1.34e-17	0.000715	5.68e-19	0	0.0929	0.021	1.35e-19	0.0152	0.0716	0.0868
TCGA-E2-A1B4-01	Low	0.836202	0	0	5.61e-18	0	7.73e-18	0	0	0.00647	3.27e-06	0	0.0168	0	0	9.1e-19	0	0.0796	0	2.79e-18	0.00741	0.0411	0.0485
TCGA-B6-A0WT-01	High	1.33466	0.00768	0.0036	0	0.000227	0	7.27e-19	8.88e-20	0.00791	0.00376	0	0.0163	3.85e-18	1.05e-19	5.44e-19	0	0.0278	0.0645	0	0.0316	0.0135	0.045
TCGA-BH-A0BR-01	High	1.33475	0	0.00132	7.72e-20	0.000351	1.55e-19	0.0174	0.0198	0.0764	0.101	0.0581	0.0826	0.0146	4.97e-21	8.9e-19	9.34e-19	0.0474	0.0551	0.0172	0.0965	0.0974	0.194
TCGA-A2-A1G4-01	High	1.33519	0.0594	0.0134	8.18e-20	0.00586	0.00157	0.0252	0.00267	0.0206	0.0303	0	0.0496	3.9e-19	0	1.74e-17	2.37e-18	0.0675	0.14	0.00521	0.0799	0.0238	0.104
TCGA-E9-A1R3-01	High	1.33533	0.0429	0	1.74e-19	6.21e-06	0	0.00819	0.0321	0.00876	0.0803	0.0539	0.0398	0.02	0	7.03e-18	0	0.0103	0	0.0101	0.126	0.0141	0.14
TCGA-LL-A6FQ-01	High	1.33684	0	0	0	0	0	1.53e-17	0.00877	0.0275	0.033	0.0348	0.0275	2.09e-19	5.76e-20	0	1.46e-17	0.194	0	0	0.033	0.0535	0.0865
TCGA-B6-A402-01	High	1.33767	7.37e-20	1.72e-20	2.99e-18	0.00203	0	6.11e-20	0	0	0.00929	0.0054	0.0192	0	4.13e-19	0	6.95e-18	0.142	0.118	9.19e-19	0.0111	0.0402	0.0514
TCGA-A8-A09N-01	High	1.33852	0	0	5.94e-18	0.00173	0.00664	0.0385	0.00708	0.012	0.0264	0.00515	0.0427	0	0	4.95e-19	0	0.0844	0.156	0	0.0415	0.0318	0.0733
TCGA-AN-A0FZ-01	High	1.33909	0.0122	0	0	0.0116	0.00496	0.00105	0.00098	0.0596	0.0123	1.53e-19	0.0349	0.00472	0.00202	1.87e-19	0.00902	0.0517	0.0372	2.17e-19	0.0337	0.038	0.0716
TCGA-A2-A4S1-01	High	1.33969	4.14e-19	4.27e-19	0.0221	0.0028	0.0384	0.0465	0.0103	0.127	0.0849	0.051	0.0721	0.124	2.02e-19	0	0	0.132	0.0286	5.66e-18	0.175	0.146	0.321
TCGA-BH-A0E7-01	High	1.33995	1.1e-18	0	3.16e-18	1.55e-18	5.28e-18	0	0	0.0291	0.0173	0	0.0315	1.03e-18	9.95e-19	1.05e-18	0	0.0231	0.0246	0	0.0359	0.0157	0.0515
TCGA-EW-A1P8-01	High	1.34026	0.0505	0.00531	0	5.36e-19	0	0.0173	0.029	0.013	0.0822	0.0539	0.0554	0.0291	1.76e-05	0	0	0.096	0.317	1.81e-19	0.138	0.0337	0.172
TCGA-BH-A1EU-01	High	1.34106	0.166	0.0394	0.0282	0.00897	0.0816	0.135	0.0431	0.0772	0.0483	0.00998	0.0999	0.0243	0.000162	0	3.59e-19	2.29e-20	0.0552	0.0188	0.262	0.213	0.474
TCGA-A2-A0D4-01	High	1.34163	0	0	1.07e-17	0	0	0	0	0.0616	0.00373	4.35e-19	0.0292	0	8.88e-05	7.29e-18	2.83e-18	0.127	0.112	0	0.0134	0.0788	0.0922
TCGA-E2-A156-01	High	1.3421	6.56e-22	1.59e-18	7.4e-18	1.89e-19	0	5.98e-18	0.00818	0.0193	0.0168	0.000608	0.0223	1.27e-17	4.06e-19	9.91e-20	2e-18	0.0647	0.00823	1.17e-18	0.0305	0.00965	0.0402
TCGA-AC-A2B8-01	Low	0.836174	3.67e-19	4.15e-21	9.61e-19	0	0	0.0385	0.00784	0.0861	0.0361	1.38e-18	0.0701	0.0128	2.44e-19	3.81e-18	0	0.01	0.0257	0.00975	0.0531	0.185	0.238
TCGA-AC-A2FF-01	Low	0.833278	0	0.00932	0.0118	0.0109	0.0646	0.125	0.0261	0.201	0.019	1.8e-19	0.0598	0.00154	0.00233	6.26e-18	2.92e-18	0.000364	0.0633	0	0.0897	0.345	0.435
TCGA-A7-A13F-01	Low	0.832033	0	0	0	4.49e-18	0	0	9.37e-22	0.0601	0.029	0.00573	0.0527	2.85e-18	0.000561	2.51e-19	0	0.093	0.12	6.09e-18	0.0287	0.0301	0.0588
TCGA-GM-A3XG-01	Low	0.83005	0	1.71e-18	0	0	0	1.5e-17	7.78e-22	0.0375	7.34e-18	0	0.0121	6.93e-19	4.87e-19	0	0	0.0792	1.2e-17	9.79e-18	8.22e-18	0.0504	0.0504
TCGA-D8-A1JA-01	High	1.34226	0.00482	0	3.97e-19	2.71e-19	8.05e-19	0.00652	0.00623	0.00035	0.0411	0.0222	0.0292	0.0205	0	4.76e-18	0	0	0.164	0.0086	0.0612	0.00816	0.0694
TCGA-AR-A1AT-01	Low	0.829881	0.0538	0.0141	0.000444	0	0.0517	0.131	0.0241	0.0719	0.0456	0.0336	0.0458	0.0167	0	5.1e-18	0	0.112	0.224	1.07e-19	0.135	0.0497	0.185
TCGA-B6-A0WX-01	Low	0.829467	0.0806	0.000458	0.0207	0.00888	0.0296	0.0521	0.00744	0.00339	0.00268	0.00594	0.0259	9.68e-18	3.22e-19	3.33e-18	1.04e-17	0.0707	0.113	0	0.0845	0.0719	0.156
TCGA-AN-A0FY-01	High	1.34251	0.00785	3.75e-19	8.38e-18	0.00164	0	7.94e-18	0.00203	0.0112	0.0111	0	0.0364	0	0	4.3e-19	6.31e-18	0.115	0.154	0	0.0242	0.0535	0.0777
TCGA-D8-A1JI-01	High	1.34365	0.00796	0	9.01e-19	0.00297	2.06e-18	0.00414	0	0.0379	0.0243	0.00118	0.0383	5.43e-19	0	0	3.03e-18	0.063	0.0184	9.6e-05	0.0316	0.021	0.0526
TCGA-A2-A25A-01	Low	0.828715	0	4.34e-19	0	0.00989	0.0108	0.0512	0.0144	0.246	0.0147	0.00384	0.0335	0	0	1.61e-17	0	0.00553	0.0694	0	0.0353	0.238	0.273
TCGA-A8-A07O-01	High	1.34386	3.41e-22	0.00993	0	1.56e-19	5.97e-19	0.00647	0.012	0.0326	0.0399	0.0413	0.0144	1.35e-20	0	1.8e-18	3.65e-18	0.0696	0.477	0	0.0385	0.0163	0.0548
TCGA-A8-A07U-01	Low	0.825308	0.224	0.0305	0.0107	0.0027	0.0503	0.17	0.0432	0.0447	0.0952	0.0897	0.0581	0.00954	0	0	0	0.148	0.353	0.0161	0.289	0.124	0.414
TCGA-D8-A1JS-01	Low	0.824578	4.81e-20	3.8e-19	1.02e-17	4.17e-19	0	0	0.000945	0.0215	0.0175	0.00368	0.0253	8.08e-18	7.89e-19	0	1.72e-17	0.114	0	1.85e-18	0.0171	0.0107	0.0278
TCGA-EW-A1P7-01	Low	0.823605	0.664	0.0374	0.128	0.0154	0.197	0.282	0.0755	0.0647	0.0152	0.0142	0.0256	0.0323	0	0	0	0.0244	0.0799	2.99e-18	0.662	0.154	0.815
TCGA-S3-AA14-01	Low	0.821266	3.03e-19	2.17e-20	8.82e-18	0.00523	0	0.000419	0.0008	0.0389	0.00625	1.2e-18	0.032	0	1.07e-18	1.69e-18	6.28e-18	0.0866	0.0334	4.65e-19	0.0184	0.0808	0.0992
TCGA-C8-A8HP-01	Low	0.820874	0.124	2.26e-19	3.68e-19	0.00624	0.0384	0.1	0.0526	0.027	0.0516	0.038	0.0471	0.0258	2.55e-18	0	0	0.137	0.142	0.00101	0.203	0.0611	0.264
TCGA-A2-A3XT-01	Low	0.816895	0.0498	6.32e-19	3.16e-18	0	2.65e-18	0.00964	0.0389	0.0279	0.131	0.113	0.0804	0.028	5.71e-19	5.34e-19	0	0.126	0.18	0.00536	0.171	0.0439	0.215
TCGA-S3-AA0Z-01	Low	0.815533	0.0548	0	0.00628	0	0.0159	0.0328	0.0128	0.0187	0.0326	0.0225	0.0373	0.0125	0	0	0	0.0372	0.474	0	0.095	0.0254	0.12
TCGA-A7-A26J-01	High	1.34595	0.00733	0.00714	0	0.00918	0	0.000507	5.19e-20	0.00365	0.0333	0.00664	0.0456	4.1e-19	0	1.14e-19	0	0.0288	0.101	0.00931	0.0429	0.0293	0.0723
TCGA-D8-A13Z-01	High	1.34697	0.0509	0.00248	0	0	0	0.0221	0.0452	0.0346	0.0432	0.0399	0.0337	0.0174	0	2.03e-19	1.76e-18	0.093	0.183	4.15e-19	0.108	0.0186	0.127
TCGA-E2-A3DX-01	Low	0.814972	0.108	6.63e-20	0.0144	0.00502	0.144	0.221	0.0177	0.106	0.0283	0.0117	0.0441	0.0142	0	2.57e-18	0	1.47e-18	0.0552	1.4e-17	0.225	0.221	0.446
TCGA-A7-A4SA-01	Low	0.813663	0.0114	0.00464	0.0214	0.00821	0.0821	0.186	0.0118	0.0376	0.0111	0.0138	0.0508	0.0032	3.53e-20	1.01e-18	6.22e-18	0.0882	0.0578	4.1e-18	0.0861	0.16	0.246
TCGA-B6-A0RP-01	Low	0.812071	0.00141	2.9e-19	6.67e-19	0.00165	0.0048	0.0548	0.00222	0.0273	0.0315	0.00276	0.0478	6.64e-19	2.12e-18	1.29e-17	4.07e-18	0.063	0.01	0.00586	0.0361	0.0746	0.111
TCGA-BH-A1FG-01	High	1.34809	0.00367	0.006	0	0.005	6.3e-19	0.0256	0.00399	0.0137	0.0316	0.00466	0.0421	0	0	0	0	0.0714	0.0534	0	0.0527	0.0169	0.0696
TCGA-C8-A27A-01	Low	0.811126	0.0195	0.0201	1.55e-18	0.0135	0.0181	0.0217	0	0.0082	0.0118	0.000862	0.0294	0	7.19e-20	0	6.75e-19	0.0735	0.222	0	0.044	0.0041	0.0481
TCGA-A8-A06X-01	High	1.34819	0.0259	0.00875	0	0.00122	0.0134	0.0495	0.0148	0.0202	0.0441	0.0551	0.0209	0.00993	8.73e-19	0.00138	2.06e-19	0.128	0.194	0.00397	0.0819	0.0147	0.0965
TCGA-AR-A2LQ-01	High	1.34881	4.8e-18	2.24e-19	1.13e-18	0	0	0.00905	0.00559	0.156	0.0162	0	0.0532	0.00287	2.07e-22	0	0	0.00515	0.016	0	0.0204	0.396	0.416
TCGA-E9-A2JS-01	High	1.34895	0.00113	2.17e-20	2.67e-19	0.00311	6.97e-19	0.00174	1.42e-19	0.0017	0.0286	0.0139	0.0345	0	0	0	0	0.178	0.126	8.24e-18	0.0299	0.00583	0.0358
TCGA-B6-A0WS-01	Low	0.811078	0.0598	0.0266	0.0211	0	0.0464	0.131	0.027	0.0274	0.0288	0.0136	0.0394	4.81e-18	0	2.79e-20	0	0.0322	0.152	0	0.118	0.0444	0.163
TCGA-A8-A09A-01	High	1.34926	8.19e-20	0.018	0.00413	0.00605	0.0368	0.0737	0.00817	0.0354	0.0295	0.00868	0.0462	0.0118	0	2.03e-18	0.000319	0.0187	0.0916	0	0.067	0.0563	0.123
TCGA-BH-A0W7-01	Low	0.811074	0.0925	0.00216	0.023	0.0158	0.0739	0.187	0.0112	0.0192	0.0532	0.0343	0.0536	0	5.71e-19	8.61e-19	2.65e-18	0.108	0.151	1.09e-18	0.167	0.0689	0.236
TCGA-AR-A1AU-01	High	1.34945	0	3.97e-19	9.59e-18	0	5.51e-20	4.14e-19	6.48e-05	0.0487	0	7.1e-19	0.0293	0	0	6.95e-18	6.72e-18	0.0466	0.0266	0	0.0143	0.167	0.182
TCGA-C8-A3M8-01	High	1.35066	0	3.77e-19	1.45e-17	0	0	0	8.69e-19	0.13	0.0054	2.69e-18	0.0493	1.64e-17	2.1e-19	2.3e-19	1.95e-18	0.0922	0.0349	0	0.00976	0.0905	0.1
TCGA-AC-A3W5-01	Low	0.809457	0.0204	0	0.00895	0.00322	0.0237	0.0745	0.0131	0.0767	0.0722	0.0368	0.0729	0.0064	5.19e-19	1.92e-18	7.68e-18	0.0761	0.0992	1.4e-18	0.0956	0.107	0.203
TCGA-AC-A23H-01	High	1.35253	2.09e-19	0.00293	0	0	9.49e-20	0.0141	0.003	0.0111	0.0228	5.68e-05	0.0362	0	1.39e-19	1.85e-18	0.00269	0.00504	0.192	1.6e-19	0.0226	0.00553	0.0281
TCGA-D8-A4Z1-01	Low	0.809264	1.23e-18	0	2.88e-18	0.00729	0	0.0142	0.00464	0.11	0.00026	0	0.0166	0	6.95e-20	0	0	0.0445	2.03e-18	0	0.0143	0.144	0.159
TCGA-B6-A0RH-01	Low	0.807537	0	4.03e-19	0	0.00309	1.93e-18	0	0	0.0242	0.0179	0.0252	0.0272	0	1.34e-18	5.34e-19	0	0.18	0.0381	0	0.0173	0.0566	0.0739
TCGA-AO-A03M-01	High	1.3533	0.0898	0.00979	0.00232	1.66e-19	0.0706	0.147	0.0195	0.0285	0.0466	0.0447	0.0349	2.79e-20	0	0	1.71e-18	0.116	0.217	0	0.159	0.0143	0.173
TCGA-EW-A1PD-01	High	1.35452	2.22e-18	2.35e-19	3.46e-18	0.000649	1.39e-18	0	2.02e-21	0.143	0.0117	1.05e-20	0.0498	7.92e-18	5.61e-20	1.7e-17	1.62e-18	0.0533	0.0823	9.42e-19	0.0136	0.183	0.196
TCGA-AR-A5QM-01	High	1.35679	1.28e-19	0	4.31e-18	1.84e-19	0	0.0265	0.00652	0.0808	0.0381	0.018	0.0754	5.75e-19	1.62e-19	4.33e-18	1.12e-17	0.0651	0.00939	4.79e-19	0.052	0.166	0.218
TCGA-A8-A08L-01	High	1.35737	0.0186	0.0121	2.42e-19	0.00263	0.0219	0.0941	0.0186	0.0408	0.0186	0.0175	0.0205	0.00852	1.62e-18	2.71e-18	0	0.199	0.109	2.96e-19	0.0596	0.0399	0.0995
TCGA-BH-A0BJ-01	Low	0.807479	0	0.00191	0	4.36e-20	0.0127	0.0457	0.00453	0.0789	0.0261	0.00829	0.0423	0	2.26e-21	0	0	0.0374	0.0439	3e-18	0.0406	0.118	0.159
TCGA-E9-A1N8-01	High	1.35856	0	9.38e-21	0	0.00249	7.18e-19	0	0.000226	0	0	0	0.000579	6.87e-18	9.16e-19	0	2.63e-19	0.125	0.113	0	0.00832	0.0328	0.0412
TCGA-LL-A50Y-01	Low	0.80498	0.0689	8.53e-20	0	0	0	0	0.0379	0.0131	0.0415	0.0213	0.0533	0.00546	0	0	0	0.142	0.00868	0	0.108	0.00656	0.115
TCGA-A8-A06Q-01	High	1.35928	0.0396	0.00707	4.78e-18	0.00367	0.00218	0.0204	0.0024	0	0.0238	0.00127	0.0417	1.11e-17	0	1.12e-17	0.00822	0.0568	0.137	0	0.0623	2.74e-19	0.0623
TCGA-B6-A0IP-01	Low	0.804673	0.138	5.96e-20	0	0.000943	0	0.0334	0.00315	0.0161	0.000924	5.94e-19	0.0236	1.11e-17	1.47e-18	0	0	0.0881	0.0484	0	0.103	0.0143	0.118
TCGA-AC-A5XS-01	Low	0.803671	0.0524	0	4.04e-18	0.00294	0.0264	0.119	0.0226	0.0802	0.0507	0.0376	0.0814	0	0.000668	6e-18	5.42e-18	0.123	0.0742	0	0.112	0.174	0.285
TCGA-AN-A0FD-01	Low	0.803659	0.00333	0.00732	1.77e-18	0.0105	0.0123	0.0371	0	0.0229	0.0137	0.0111	0.0162	0	3.22e-19	8.02e-19	4.68e-18	0.108	0.0819	0	0.0278	0.0642	0.092
TCGA-EW-A1OY-01	High	1.3602	0.0019	0	0	0.0101	0	0	0.00472	0.022	0.0152	0.0119	0.0285	0	6.22e-19	0	0	0.14	0.109	1.68e-18	0.0244	0.011	0.0354
TCGA-A7-A6VV-01	High	1.36237	0.0339	0.00129	0	0.00207	0	0.0203	0.0181	0.0249	0.049	0.0369	0.0638	0.0285	0	1.75e-18	3.86e-19	0.119	0.146	0.00596	0.0985	0.0254	0.124
TCGA-B6-A401-01	Low	0.795849	0.0502	0	4.43e-18	0.0056	1.15e-19	0.00767	0.0137	0.0238	0.0264	0.0207	0.0346	0	3.15e-19	4.77e-19	2.27e-17	0.107	0	5.24e-18	0.0662	0.0918	0.158
TCGA-C8-A8HR-01	Low	0.795002	0	0	1.07e-18	0.0128	0.0283	0.0769	0.0194	0.194	0.0266	0.0301	0.0355	0.0056	0	7.56e-18	8.62e-20	0.0435	0.108	6.66e-19	0.0582	0.237	0.295
TCGA-E2-A14Z-01	Low	0.794311	0.0789	0.0172	0.0297	0.00618	0.082	0.126	0.0439	0.0522	0.062	0.0329	0.0686	0.0161	0	0	0	0.127	0.0922	0.0065	0.205	0.0699	0.275
TCGA-AC-A3W6-01	Low	0.793702	1.48e-18	2.14e-19	0.0236	0.0121	0.0453	0.112	0.0123	0.179	0.0213	0.0117	0.0463	2.58e-19	0	3.09e-18	4.34e-18	0.0651	0.0669	1.13e-17	0.0599	0.235	0.295
TCGA-D8-A1JK-01	Low	0.793382	0.0253	0.0071	0	0.000131	5.08e-19	0.0381	0.0443	0.0562	0.0896	0.0671	0.0415	0.0326	0	1.16e-17	0	0.131	0.151	0	0.128	0.0617	0.19
TCGA-C8-A12Z-01	High	1.36529	0	0	3.83e-18	0	0	7.57e-19	3.99e-19	0.0182	0.00325	1.04e-19	0.0158	0	0	0	0	0.0896	0.158	0	0.00992	0.0321	0.042
TCGA-A7-A0D9-01	High	1.36533	0	0.000744	0	0.0081	0.00799	0.00622	0.00178	0.0223	0.00662	2.59e-19	0.0296	0	3.21e-21	0	0	0.0598	0.0232	0.00508	0.0231	0.0689	0.092
TCGA-E2-A1IK-01	Low	0.793148	0.0453	0.0168	0	4.65e-19	0.0398	0.105	0.0104	0.0362	0.0487	0.0222	0.0689	9.6e-19	0	0	2.25e-18	0.101	0.0747	0.00531	0.107	0.0181	0.125
TCGA-AR-A24M-01	High	1.36582	2.22e-18	0	3.35e-18	0	0	4.22e-19	7.58e-20	0.0283	0.0128	0.00189	0.0203	0	0	5.32e-19	2.09e-20	1.4e-18	0.0465	1.21e-18	0.0293	0.0391	0.0684
TCGA-OK-A5Q2-01	Low	0.79237	0.125	8.27e-20	0.0205	1.95e-20	0.00662	0.0819	0.0233	0.062	0	4.15e-20	0.0272	2.38e-18	0	0	6.16e-18	0.0654	0.0924	1.32e-17	0.107	0.151	0.258
TCGA-E9-A5FL-01	High	1.36621	1.52e-19	0	2.79e-19	0	2.27e-18	2.94e-19	0.0314	0.0167	0.0133	0.0129	0.0332	0.0144	1.18e-18	0	0	0.145	0.142	0	0.0394	0.213	0.252
TCGA-BH-A18V-01	High	1.36713	0.0526	0.0264	0	0.00561	0.0206	0.0443	0.0208	0.0209	0.0763	0.04	0.0422	0.0479	4.87e-22	0	6.2e-19	0.0217	0.49	7.66e-19	0.154	0.0528	0.206
TCGA-AC-A3QQ-01	Low	0.791447	0.0625	5.67e-18	0	0.00225	0	0.0128	8.51e-22	0.0322	0.0308	0.0182	0.0586	9.35e-19	1.61e-18	1.48e-17	0	0.202	0.035	0	0.0692	0.0713	0.14
TCGA-OL-A5RV-01	Low	0.791229	6.67e-19	0	1.7e-17	0	0	0	0.00325	0.0215	0.000222	0	0.0128	0	2.45e-19	0	0	0.037	0	1.47e-19	0.0145	0.0484	0.0629
TCGA-A7-A26F-01	Low	0.791141	0.0379	0.0208	0.000983	1.51e-22	0.00466	0.0314	0.0266	0.0328	0.0392	0.0355	0.0225	0.0594	0.00228	1.93e-18	5.3e-19	3.13e-18	0.24	0.033	0.134	0.0291	0.163
TCGA-E9-A295-01	High	1.36721	0	0	0	0.0171	4.47e-18	0.0177	0.0119	0.07	0	0	0.0158	1.9e-17	6.87e-19	0	1.41e-17	0.113	0.0204	1.29e-18	0.0178	0.13	0.148
TCGA-AO-A03N-01	High	1.36768	1.27e-18	0	0	0.00755	0	0.0188	0	0.0878	0.00961	7.62e-21	0.0247	0	1.66e-19	0	0	0.125	0.0781	2.26e-18	0.00641	0.077	0.0834
TCGA-A2-A0CZ-01	Low	0.789992	1.2e-19	0	0	0.00418	0.011	0.0724	0.0185	0.101	0.011	0	0.0565	6.59e-19	0	6.34e-18	0	0.0612	0.0157	0	0.0411	0.257	0.298
TCGA-C8-A12P-01	High	1.36873	0.0418	0	1.26e-17	0.00945	2.56e-18	0.0114	0.00142	0.0232	0.0535	0.0452	0.0643	8.7e-19	3.39e-19	1.35e-20	6.27e-19	0.132	0.206	6.14e-18	0.0691	0.0267	0.0959
TCGA-E9-A5UP-01	High	1.36903	0.0147	0	2.95e-18	0	0	2.22e-19	0	0	0.0541	0.0343	0.038	0	0.000359	2.06e-17	0	0.0953	0	4.03e-18	0.058	6.29e-20	0.058
TCGA-AR-A0TS-01	High	1.37244	0.444	0.034	0.117	1.14e-20	0.137	0.151	0.0504	0.0471	0.028	0.0266	0.0367	0.0414	0	0	0.00107	0.0249	0.276	0	0.492	0.113	0.605
TCGA-AN-A04D-01	High	1.37319	3.05e-19	8.83e-19	8.45e-18	0.000308	6.68e-19	1.9e-18	2.03e-19	0.0191	0	3.36e-21	0.0116	2.29e-18	1.22e-19	0	2.21e-19	0.176	0.195	0	0.00544	0.0102	0.0157
TCGA-E9-A3X8-01	Low	0.788721	0.00503	0	0	0.0202	0.0903	0.153	0.00947	0.0647	0.0107	0.0207	0.0492	0	6.66e-18	0	1.03e-17	0.215	0.0203	2.35e-17	0.0784	0.157	0.236
TCGA-D8-A1XZ-01	High	1.37419	0.0469	0.0175	4.65e-19	0.0138	0.0196	0.0267	0.00578	0.00562	0.0339	0.0113	0.0443	0.0138	3.21e-20	2.11e-18	0	0.0549	0.125	0.00823	0.0947	0.0262	0.121
TCGA-AN-A049-01	High	1.37697	0.0143	0.00262	0	0.00202	1.35e-18	0.0189	0.0105	0.0392	0.0573	0.0284	0.0538	0.00377	0	0	1.52e-18	0.0915	0.0908	0.00104	0.0722	0.0947	0.167
TCGA-E2-A14P-01	High	1.37822	0.0606	0.0039	0	0	9.97e-22	0.0516	0.022	0.0188	0.00626	0.0109	0.0251	2.22e-19	0	6.09e-18	1.88e-17	0.145	0.254	1.75e-17	0.0595	0.0573	0.117
TCGA-C8-A273-01	High	1.37937	0	1.87e-19	0	0	0	0.0111	0	0.0228	0.0282	0.0229	0.0281	1.69e-18	0.000763	1.27e-18	1.1e-17	0.141	0.0679	4e-18	0.0309	0.0349	0.0657
TCGA-BH-A0AU-01	High	1.38267	0.0138	0.00877	0.00151	0.00128	0.0215	0.0582	0.00764	0.0127	0.0194	0.0079	0.0396	2.67e-18	5.49e-19	5.21e-18	0	0.0225	0.149	0.0063	0.0561	0.0492	0.105
TCGA-BH-A18L-01	High	1.38353	0.00587	0	1.09e-18	0.00717	9.94e-19	0.00909	4.35e-21	0.0377	0.0226	0	0.0472	1.93e-18	3.75e-19	0	0	0.0871	0.176	0.00285	0.029	0.0235	0.0525
TCGA-A2-A0YG-01	High	1.38416	0.00914	0.00324	5.86e-18	6.21e-19	0	4.01e-20	0.0077	0.0232	0.00766	0	0.0296	0	0	0	0	0.0664	0.17	0.015	0.0226	0.0116	0.0342
TCGA-V7-A7HQ-01	High	1.38424	0.00982	1.51e-19	0	3.97e-19	0	8.08e-18	6.36e-19	8.99e-20	0.0216	0.0134	0.0507	0	6.22e-20	1.62e-18	0	0.182	0	0	0.0257	0.0231	0.0488
TCGA-A2-A04Y-01	Low	0.787424	0.0396	0.0161	0	0.0203	0.0696	0.104	0.00707	0.0411	0.0761	0.0444	0.0737	0.0219	1.38e-18	0	3.58e-18	0.0737	0.166	8.97e-19	0.156	0.0869	0.243
TCGA-B6-A0RG-01	High	1.38583	2.57e-18	1.46e-19	4.08e-18	0	1.51e-17	1.22e-17	2.1e-19	0.0199	0.00151	0	0.0138	0	0.00232	0	3.62e-18	0.0933	0.0538	0	0.00907	0.0168	0.0258
TCGA-AO-A126-01	Low	0.785432	0	0	1.18e-17	0.00675	3.64e-18	0.0132	0	0.104	0.0211	0.00518	0.042	1.56e-18	1.06e-19	0	0	0.132	0.0443	3.21e-18	0.0244	0.128	0.153
TCGA-AC-A3YJ-01	Low	0.784662	1.58e-19	0	1.44e-17	0.00175	0	0	0.001	0.0359	0.0548	0.0255	0.0613	0.0312	0	1.67e-18	9.01e-18	0.111	0.00575	2.34e-18	0.0659	0.0179	0.0838
TCGA-A8-A084-01	High	1.38596	1.25e-19	0	1.05e-18	3.6e-19	0	0	0	0	0.019	0.0109	0.0216	5.39e-18	0.0101	2.38e-18	0	0.0603	0.0817	0	0.0261	0.00121	0.0273
TCGA-AO-A0J3-01	Low	0.784492	0.00698	7.49e-20	0	0.00432	7.49e-20	6.31e-19	0	0.0171	0.0106	0.00134	0.0276	3.41e-18	1.09e-18	8.69e-19	0	0.142	0.118	1.31e-18	0.0285	0.00854	0.0371
TCGA-E2-A15R-01	High	1.38602	1.57e-20	0	1.16e-17	0.00387	1.27e-18	1.52e-17	0	0.0143	0.00133	0	0.0121	5.87e-18	2.09e-20	0	1.77e-18	0.075	0.0693	6.25e-19	0.0127	0.00716	0.0198
TCGA-AO-A0J4-01	Low	0.783608	0.196	0.0225	0.0266	0	0.0497	0.0866	0.0217	0.0235	0.0191	0.0223	0.0168	0.0116	6.87e-19	2.32e-19	2.89e-19	0.0522	0.327	0	0.203	0.0162	0.219
TCGA-A7-A26I-01	High	1.38731	4.35e-18	0.0103	0	0.00224	1.98e-18	0.00945	1.86e-19	0.0245	0.0633	0.0327	0.0435	0.00538	1.01e-18	3.74e-18	0	1.43e-18	0.487	3.33e-19	0.0526	0.0466	0.0992
TCGA-A2-A0T3-01	High	1.39023	3.06e-19	0	0	0.00664	0	0	3.74e-19	0.0393	0	2.94e-18	0.0224	2.25e-17	4.33e-19	3.97e-18	7.22e-19	0.143	0.0979	5.53e-18	0.00948	0.029	0.0384
TCGA-D8-A1JJ-01	High	1.39345	0.00275	0.0144	0	0.00148	0.00697	0.0175	0.00392	0.00768	0.0445	0.0137	0.0473	0.0161	0	4.27e-19	7.13e-19	0.043	0.153	0.0149	0.0615	0.0482	0.11
TCGA-E2-A10A-01	High	1.39515	0.00771	2.11e-21	0	0	0	8.64e-19	0	0.00674	0.0368	0.0121	0.0356	2.14e-18	0	6.53e-19	0	0.037	0.117	0	0.0399	0.0222	0.0622
TCGA-B6-A0I9-01	High	1.39521	0.0466	0.0103	0	0.00496	0.0109	0.0042	0.0184	0.0133	0.0277	0.014	0.0248	0	7.29e-20	0	7.28e-19	0.055	0.196	3.3e-18	0.0805	0.00666	0.0871
TCGA-E9-A1NH-01	Low	0.782531	6.86e-21	2.31e-20	0.00861	0.00526	0.00993	0.0228	0.00192	0.0851	0.0255	8.54e-19	0.0417	0.0051	0	1.18e-19	0	0.0329	0.0123	0.0136	0.0354	0.0916	0.127
TCGA-A8-A09D-01	High	1.3984	0	0.00302	0	0.000969	1.5e-19	0.0445	0.013	0.0811	0.0778	0.0321	0.126	0.0171	4.6e-21	0	0	0.0467	0.113	1.61e-18	0.0761	0.276	0.352
TCGA-A7-A4SE-01	High	1.40242	0	0	8.48e-18	0	0	0	0.0057	0.0541	0.0108	0.0178	0.0171	0	0	2.25e-19	0	0.0577	0.254	1.21e-17	0.0112	0.112	0.123
TCGA-D8-A1X9-01	High	1.40285	0.0155	0.0113	0	0.0146	0.0122	0.0465	0.00944	0.0257	0.0714	0.047	0.0375	0.00714	1.92e-22	2.02e-18	9.93e-18	0.0952	0.106	0.0236	0.0925	0.0179	0.11
TCGA-UU-A93S-01	Low	0.782506	6.44e-20	0	1.67e-18	0	4.38e-18	0	0.00164	0.0307	0.0221	0.0265	0.028	1.49e-17	0	2.73e-18	0	0.248	0.109	0	0.0241	0.0408	0.065
TCGA-A8-A08J-01	High	1.40573	0.01	6.03e-21	6.43e-18	0.0105	1.65e-18	0.00298	0.0037	0.0221	0.0523	0.0279	0.054	0.0156	6.51e-19	0	0	0.0605	0.117	0	0.0618	0.0159	0.0778
TCGA-BH-A0H6-01	High	1.40628	1.39e-18	2.93e-19	6.31e-18	0.00146	0	2.67e-18	0	0.023	0.0198	0	0.0454	2.94e-18	1.48e-19	0	1.32e-18	0.0444	0.0146	8.43e-19	0.0234	0.102	0.125
TCGA-BH-A1FB-01	High	1.40679	0.132	0.0328	0.0337	0.0108	0.0711	0.122	0.0352	0.0368	0.0299	0.0069	0.0378	0.021	0	4.78e-18	2.11e-19	0.00293	0.033	0.015	0.221	0.112	0.333
TCGA-A8-A07F-01	High	1.40749	0.00265	0.00542	0.00156	1.07e-18	0.0138	0.0234	0.00488	0.0112	0.0265	0.00211	0.0467	1.83e-19	0	7.79e-18	1.88e-18	0.0429	0.105	0.0213	0.0586	0.00559	0.0642
TCGA-D8-A1XO-01	Low	0.781997	0.0121	0.00719	1.63e-20	0.00502	0.00634	0.0461	0.00362	0.00955	0.0255	1.97e-19	0.0391	0.0123	0	7.82e-19	0.0026	0.0292	0.0236	0.0104	0.0583	0.0608	0.119
TCGA-C8-A12M-01	Low	0.781606	0.0196	0.023	0	0.0144	0.0316	0.0576	0.00126	0.0921	0.00882	2.56e-18	0.0331	0	0	0.00609	6.7e-18	0.0621	0.112	0.0283	0.0658	0.0461	0.112
TCGA-D8-A1JN-01	Low	0.781492	0.0135	0.00481	0	0.00891	0.0176	0.0537	0.00142	0.0254	0.0104	0	0.0373	0	0	1.23e-17	0	0.053	0.033	0.0195	0.0487	0.0127	0.0614
TCGA-A2-A3XZ-01	Low	0.780912	0.316	0	0.0377	0.00663	0.0387	0.112	0.151	0.0136	0.00872	0.000175	0.0273	0.000719	0	0	0	0.106	0.12	1.45e-17	0.346	0.0377	0.383
TCGA-JL-A3YW-01	High	1.4078	0.0174	0.00203	2.82e-18	0.0102	0.0107	0.0418	0.0205	0.054	0.128	0.0828	0.0749	0.0495	0	0	6.09e-18	0.0754	0.0686	0.0203	0.151	0.141	0.292
TCGA-AC-A5XU-01	High	1.40836	0	9.42e-19	6.81e-18	1.08e-19	1.6e-18	0	0	0.0829	0.00303	0.00528	0.0126	1.86e-17	0	4.5e-19	0	0.136	0.0466	1.52e-18	0.00926	0.0782	0.0874
TCGA-A2-A0ER-01	High	1.40949	0.0123	0.0105	0	0.00341	0	0.0074	0.00699	0.0162	0.0277	0.00483	0.0355	4.81e-18	0	5.91e-18	0.00623	0.0465	0.109	2.52e-19	0.0563	0.0124	0.0687
TCGA-E2-A1LB-01	High	1.41229	0.00421	0.00674	0	0.00552	0.00588	0.0207	0.000237	0.0329	0.0384	0.0137	0.0489	0.00074	2.77e-19	1.09e-18	0	0.0634	0.0495	0.000209	0.0431	0.038	0.0811
TCGA-A7-A6VX-01	High	1.41285	0	1.54e-18	8.8e-18	2.89e-19	0	0	0.000424	0.0152	0.0289	0.0116	0.0377	0	0	4.38e-19	0	0.0758	0.0276	0	0.0265	0.0539	0.0804
TCGA-A8-A08O-01	High	1.41451	7.76e-21	0	0	0.00769	0.00777	0.00791	0	0.00648	0.00546	0	0.0142	0	0	1.3e-18	0	0.0448	0.0757	2.06e-18	0.0222	0.0812	0.103
TCGA-A8-A08P-01	High	1.41475	0.0554	0.0203	0	0.00892	0.0629	0.103	0.0315	0.0355	0.132	0.0966	0.0752	0.0227	0	2.36e-19	0.00606	0.0957	0.204	0.0073	0.218	0.0431	0.261
TCGA-BH-A18H-01	Low	0.779703	0.12	0.0158	2.02e-21	0.0374	0.2	0.245	0.0216	0.0848	0.0637	0.0358	0.0478	0.0081	1.2e-18	2.43e-19	0	0.0805	0.133	0.0078	0.295	0.0679	0.363
TCGA-EW-A1P5-01	High	1.41494	0.033	0	2.75e-19	0	0.00351	0.0198	0	4.89e-20	0.0614	0.0361	0.0447	0.00031	0	0	0	0.131	0.0153	0.0219	0.0738	1.98e-18	0.0738
TCGA-A7-A6VW-01	High	1.41515	0.0131	0	0	0.00018	1.32e-18	1.28e-19	4.25e-20	0.00468	0.0606	0.0667	0.0281	0.0242	0.00175	9.98e-18	1.54e-19	0.275	0.132	0	0.0664	0.029	0.0954
TCGA-D8-A1XC-01	High	1.41599	0.011	0.00363	0	0	0	0.00409	0	0.0101	0.0313	0.0023	0.0296	1.8e-18	2.03e-19	3.81e-18	0	0.0471	0.0244	0	0.0412	0.00504	0.0462
TCGA-E9-A1R7-01	High	1.42154	0	0.0137	2.09e-18	0.0069	0	0.0203	0.00135	0.0144	0	3.87e-18	0.00564	0	0	0	0.0235	0.0075	0.134	1.07e-19	0.0136	0.0109	0.0246
TCGA-AR-A1AO-01	High	1.42245	0.0432	0.0149	0	0.00536	0.0822	0.134	0.0445	0.126	0.293	0.174	0.195	0.0795	4.03e-19	7.92e-18	0	0.0316	0.157	0	0.38	0.177	0.557
TCGA-BH-A0BL-01	Low	0.777418	0.0664	0.0171	0	0	0.00704	0.0606	0.0293	0.0512	0.0418	0.0141	0.0647	0.0131	0	2.37e-18	0	0.00515	0.294	9.97e-20	0.109	0.219	0.328
TCGA-BH-A42T-01	High	1.42796	0.00474	0	3.74e-18	4.46e-21	0	0.012	0.00718	0.0236	0.0048	3.17e-18	0.0543	0.00171	0	6.86e-18	0	0.111	0.16	1.1e-18	0.0173	0.168	0.185
TCGA-A8-A06U-01	High	1.43024	0.031	0.00104	0	0.00169	0.0294	0.018	0.0213	0.00568	0.0354	0.0221	0.0306	3.04e-18	0	4.41e-18	0	0.0893	0.104	0.000551	0.0869	0.00284	0.0897
TCGA-B6-A0IA-01	Low	0.776854	0	0	5.3e-18	0	8.46e-18	1.2e-17	3.56e-19	2.39e-19	0.029	0.0125	0.0241	1.38e-17	0	7e-18	1.89e-18	0.123	0.0613	3.02e-18	0.0278	1.56e-17	0.0278
TCGA-A2-A25B-01	High	1.4314	0.0222	0.0258	0	0.00172	8.27e-20	0.0373	0.00426	0.00728	0.0418	0.02	0.0349	0.00983	2.91e-19	0	0	0	0.407	0	0.0651	0.0199	0.085
TCGA-E2-A1LI-01	Low	0.776795	0.0369	0.0153	0	0.000712	0.00332	0.0202	0.00987	0.0163	0.0236	0.0166	0.02	0.0153	0.00577	9.36e-19	3.67e-18	0.0981	0.381	1.75e-19	0.0747	0.00816	0.0829
TCGA-A2-A0YE-01	High	1.43303	4.33e-19	4.83e-21	0	0	0	0.00845	0.00217	0.0154	0.0076	0.00207	0.0103	0	2.72e-18	2.64e-18	4.6e-19	0.0413	0.253	0	0.00651	0.0132	0.0197
TCGA-AC-A3TN-01	Low	0.774805	1.64e-18	0	5.83e-18	1.71e-19	7.39e-19	0	0	0.0258	0.0029	0.000434	0.0342	9.9e-18	0	3.71e-19	1.23e-17	0.112	1.13e-18	0	0.00414	0.053	0.0571
TCGA-AR-A24K-01	High	1.4356	0.0131	0.0132	1.78e-18	0.0219	0.00844	0.012	0	1.97e-19	0.00601	1.36e-18	0.00769	0	0	2.61e-18	0	0.0672	0.145	0.00205	0.0506	0.0124	0.063
TCGA-BH-A0B7-01	Low	0.773957	0.0544	0.0169	0.00485	9.28e-20	0.0719	0.138	0.0203	0.123	0.0342	0.0144	0.0522	0	0	0	0	0.0127	0.178	0	0.121	0.201	0.322
TCGA-LQ-A4E4-01	High	1.43561	0	0	0	0.000285	1.48e-18	0	6.18e-20	0.0216	0.00468	0	0.0356	0	2.62e-20	0	0	0.114	0.0511	5.54e-18	0.0131	0.116	0.129
TCGA-D8-A1JC-01	High	1.43877	0.00522	0.0044	0	7.6e-19	0	0.0386	0.00328	0.0122	0.0284	0.0103	0.039	0	2.48e-19	0	6.58e-19	0.0268	0.149	0	0.038	0.0172	0.0552
TCGA-E9-A22A-01	Low	0.773868	1.68e-22	0.0144	1.62e-18	0.0133	0.0607	0.125	0.0102	0.064	0.0614	0.0443	0.0514	0.0292	0.00989	1.02e-18	0	0.0283	0.271	0	0.124	0.115	0.239
TCGA-AN-A0FL-01	High	1.43999	0	6.35e-19	1.33e-17	0	0	2.55e-18	0	0.0455	0.0192	0.0119	0.0403	0	6e-19	4.58e-19	2.09e-17	0.0805	0.0227	2.14e-18	0.0189	0.0256	0.0445
TCGA-AO-A128-01	Low	0.77344	0.208	0.0777	0.0595	0.0246	0.232	0.329	0.0353	0.0123	0.155	0.131	0.0622	0.0661	1.86e-19	0.0575	0.0244	0.23	0.341	0.0238	0.542	0.0319	0.574
TCGA-E9-A22G-01	Low	0.7723	0.0107	0.00081	0	0.00373	1.51e-19	0.00402	0.0161	0.00929	0	0.000967	0.0196	0	0	0	0	0.156	0.321	5.02e-18	0.0179	0.00464	0.0225
TCGA-BH-A18J-01	High	1.44359	5.33e-19	1.82e-19	2.23e-18	0	8.2e-19	0	0	0.0382	0.0254	0.0149	0.0243	0.00592	0	1.64e-18	0	0.0473	0.0823	4.74e-19	0.0258	0.0638	0.0897
TCGA-A2-A0CP-01	Low	0.770566	0	0	8.21e-18	0.00104	1.44e-18	1.51e-19	0.00335	0.103	0.00981	0.000546	0.0419	0	0.0014	1.03e-17	0	0.0672	0	0	0.0227	0.162	0.185
TCGA-BH-A0B1-01	High	1.44629	0	3.18e-20	0	0	0	0.00111	0.000608	0.084	0.002	4.75e-19	0.0295	9.49e-18	0	1.25e-17	0	0.00203	0.113	2.01e-18	0.0115	0.0836	0.0951
TCGA-AO-A12A-01	Low	0.768251	0.00498	0	0	0.00607	0.01	0.0353	0.00359	0.0532	0.00404	0	0.027	3.57e-18	4.42e-19	3.76e-18	0	0.0354	0.0385	1.56e-18	0.0224	0.126	0.149
TCGA-A7-A0CD-01	Low	0.768028	3.97e-19	2.03e-19	0	0	4.61e-19	8.82e-22	0	0.0467	0.00818	0	0.026	0	0	0	0	0.0282	0.126	6.89e-18	0.0207	0.0304	0.0511
TCGA-E2-A1IJ-01	Low	0.767392	0	6.88e-21	0.00223	0.0108	0.0362	0.0931	0.0116	0.108	0.0297	0.00868	0.0462	0.00499	0.000608	0	0	0.0371	0.0376	1.4e-18	0.071	0.141	0.212
TCGA-A2-A25F-01	Low	0.765108	0.351	0.264	0.123	0.0294	0.254	0.407	0.171	0.0911	0.177	0.101	0.0945	0.126	0	8.87e-19	0.0338	0	0.558	0.0558	0.815	0.209	1.02
TCGA-D8-A1JT-01	High	1.44691	0.0053	0.00357	0	0.000687	7.96e-19	0.00665	0	0	0.055	0.025	0.0675	0	0.00204	2.16e-18	1.48e-17	0.0289	0.216	0	0.0484	1e-17	0.0484
TCGA-A2-A259-01	High	1.44735	0.0598	0.00791	0	0	0	0.0132	0.0416	0.082	0.013	0	0.0242	0.00846	0.0013	7.09e-18	0	0.0282	0.0116	2.32e-20	0.113	0.0826	0.196
TCGA-B6-A0I5-01	Low	0.764571	0.01	0	0	0.00458	1.42e-19	0.0276	0.0111	0.0432	0.0281	0.0253	0.0309	0	0	2.16e-18	0	0.145	0.0292	4.08e-18	0.0369	0.0657	0.103
TCGA-A2-A0D1-01	High	1.45069	1.98e-18	0.00324	1.55e-18	0	3.24e-18	0	0	0.0689	0	5.24e-18	0.021	0	1.75e-18	4.27e-19	0	0.174	0.153	1.22e-17	0.00225	0.0344	0.0367
TCGA-BH-A28O-01	Low	0.761579	2.51e-18	1.45e-19	0	0.0138	0.00304	0.0217	4.57e-19	0.114	0	0	0.0125	1.73e-17	0	1.9e-17	0	0.0216	0	0	0.00202	0.295	0.297
TCGA-BH-A0DT-01	Low	0.761388	3.06e-19	0.000482	0.00206	0	0.00514	0.0503	0.016	0.0588	0.00572	0	0.0221	0	0	9.2e-18	0	0.0427	0.031	0.00519	0.0256	0.115	0.14
TCGA-D8-A27N-01	High	1.45307	0.0277	0.00648	7.55e-19	0.00213	0.002	0.0431	0.00414	0.0393	0.075	0.0388	0.0898	0.0308	1.07e-20	2.33e-20	0	0.0599	0.128	1.68e-20	0.105	0.0802	0.185
TCGA-A8-A07L-01	High	1.45459	1.64e-19	0.00249	2.45e-18	0.00614	0	0.00425	0	0.0233	0.0145	0.00184	0.0244	0	0	3.06e-18	0	0.0687	0.316	0	0.0107	0.041	0.0517
TCGA-AC-A8OQ-01	Low	0.760365	0.128	0	0.0349	0.00693	0.0676	0.0834	0.016	0.0977	0.0147	0.0193	0.041	0.00296	0	0	1.25e-19	0.0984	0.209	0	0.156	0.189	0.345
TCGA-E2-A1BD-01	Low	0.756163	0	0	0	0.00411	3.22e-18	0	2.5e-19	0.0772	0	0	0.0262	0	0	1.57e-18	0	0.112	0	6.45e-19	0.0056	0.0669	0.0725
TCGA-E2-A14V-01	High	1.45577	2.17e-19	0	0	0	0	0	3.31e-19	0.00287	8.14e-20	2.64e-18	0.0138	4.94e-18	0	0	2.23e-17	0.0581	0.277	3.64e-18	0.0109	0.0117	0.0227
TCGA-AR-A5QQ-01	Low	0.754869	0.143	0.0206	0.00389	0.0153	0.0664	0.143	0.135	0.0344	0.0584	0.0513	0.0293	0.0675	0	0	8.98e-18	0.139	0.468	0	0.315	0.0172	0.333
TCGA-AN-A0AJ-01	High	1.45639	0.0921	0.0338	0	0.0183	0.0659	0.112	0.051	0.00166	0.0625	0.0345	0.0523	0.0206	1.24e-18	0	0.0263	0.162	0.261	0.00672	0.215	0.0095	0.224
TCGA-BH-A0BG-01	Low	0.753358	0.164	0.0248	1.69e-18	0	0.0813	0.144	0.0181	0.00281	0.0294	0.0229	0.0289	2.44e-18	2.78e-19	9.38e-19	1.9e-19	0.0256	0.425	5.74e-18	0.2	0.0304	0.23
TCGA-E2-A1B0-01	Low	0.753293	0.0272	0.0136	0	0	0.0137	0.0275	0.012	0.0431	0.0434	0.0203	0.0572	2.56e-19	0	0	0	0.0835	0.214	0	0.0684	0.04	0.108
TCGA-E2-A1L6-01	Low	0.751907	0.00434	1.13e-20	0	0.00142	0	1.32e-19	0.00203	0.0273	0.0102	0	0.0279	0	4.28e-20	1.33e-18	3e-18	0.0279	0.0593	0.000471	0.0192	0.0916	0.111
TCGA-E2-A15D-01	Low	0.751837	1.84e-18	0	0	0.00615	0.0176	0.0552	3.41e-19	0.0582	0	1.12e-18	0.0275	2.29e-19	0	0	7.09e-19	0.0386	0.00844	0	0.0191	0.222	0.241
TCGA-D8-A1JF-01	High	1.46029	0.0329	0.0145	0.0138	0.00979	0.0228	0.0665	0.0301	0.00341	0.0497	0.00869	0.0644	1.47e-22	4.09e-20	8.99e-19	0.0108	2.8e-18	0.0539	0.00833	0.103	0.0334	0.136
TCGA-D8-A1JE-01	High	1.46104	0.00769	4.69e-19	7.85e-19	0	2.97e-18	0.0108	2.17e-20	0.0179	0.0686	0.00916	0.0671	0.00601	0	0	1.02e-17	0.0429	0.129	0	0.0689	0.0504	0.119
TCGA-B6-A0I8-01	High	1.46459	1.98e-18	0	5.91e-18	0.00495	0	2.53e-19	2.15e-21	0.0481	0.0122	0.00445	0.0333	0	6.34e-19	8.27e-18	1.28e-18	0.0334	1.52e-18	0	0.0172	0.0574	0.0746
TCGA-C8-A1HJ-01	High	1.46494	0.0116	0.0223	0	0.0099	0.0179	0.0394	0.00331	0.0398	0	8.09e-21	0.00982	0	0.00281	7.87e-18	0	0.212	0.331	3.86e-19	0.0249	0.0346	0.0595
TCGA-BH-A18R-01	High	1.46764	0.0324	0.0118	0	0.00531	0.00342	0.0287	0.014	0.00699	0.00225	3.24e-18	0.0128	0	0	1.47e-17	1.62e-17	0.0848	0.293	0	0.0501	0.00349	0.0536
TCGA-A2-A0SV-01	High	1.4687	0.00431	0	1.28e-18	0	0	0	0.00737	0.0114	0.104	0.076	0.0943	0.0214	0	4.03e-19	3.23e-18	0.124	0.138	0	0.102	0.053	0.155
TCGA-E2-A14O-01	High	1.47231	0.00418	2.19e-18	9.6e-18	0.00963	3.95e-18	0	1.63e-05	0.00572	0.039	0.00909	0.0592	8.49e-18	2.66e-19	1.2e-18	0	0.159	0.0644	5.1e-18	0.0326	0.0244	0.0569
TCGA-C8-A1HG-01	Low	0.748712	0.106	0.0129	0	0.0171	0.075	0.139	0.0279	0.00741	0.0551	0.0351	0.0632	8.62e-20	9.47e-19	0	0	0.127	0.283	0	0.181	0.01	0.191
TCGA-BH-A0W5-01	Low	0.748351	0.427	0.0642	0.116	0.00239	0.098	0.195	0.0189	0.025	0.0335	0.00188	0.0487	0	0	6.26e-18	0	0.0278	0.0518	0	0.43	0.0942	0.524
TCGA-AC-A3OD-01	Low	0.746982	0.0351	0.0171	0.0213	2.73e-20	0.0771	0.141	0.0488	0.0397	0.084	0.0355	0.0969	0.0129	4.56e-19	0	0	0.0487	0.0773	1.84e-18	0.19	0.0882	0.278
TCGA-AN-A0AR-01	Low	0.746726	1.1e-18	0.00203	0	0.0073	1.51e-18	0	1.27e-18	0.00617	0.00951	0.0121	0.0176	0	1.71e-20	0	1.48e-18	0.12	0.417	0	0.00776	0.00308	0.0108
TCGA-E2-A14Q-01	Low	0.746521	0	3.65e-19	8.96e-18	0.00117	0	0.0234	0.000742	0.0273	0	0	0.0151	7.9e-18	0	1.06e-19	0	0.0721	0.0415	0	0.00931	0.0452	0.0545
TCGA-D8-A13Y-01	High	1.47382	1.65e-21	1.03e-18	0	0.0129	7.45e-19	0.00819	4.22e-19	0	1.23e-20	0	0.0235	1.7e-17	0	0	1.74e-18	0.148	0.151	7.7e-18	0.0011	0.00978	0.0109
TCGA-GM-A3XN-01	Low	0.746218	9.25e-19	3.43e-19	8.78e-21	0.00544	0.0127	0.0503	0.00776	0.16	0.0158	0	0.0592	8.63e-19	0	4.5e-18	9.08e-18	0.0642	0.00221	3.75e-20	0.0241	0.31	0.334
TCGA-A2-A0D0-01	Low	0.745806	0.00247	0.0106	0	0.0101	1.82e-19	0.049	0.0214	0	0.0138	0.0235	0.004	0	0	0	9.42e-19	0.261	0.399	1.22e-18	0.0265	0.0122	0.0387
TCGA-BH-A1ET-01	Low	0.745553	4.39e-20	0.00767	0	0.0088	0.0214	0.0524	0.00103	0.0627	0.0253	0.000367	0.0337	3.13e-18	0	2.03e-19	4.65e-19	0.0185	0.024	0.0109	0.0481	0.0601	0.108
TCGA-LL-A440-01	High	1.47522	0	1.34e-18	0	9.51e-20	2.33e-18	2.54e-18	0.0537	0.182	0.122	0.0471	0.153	0.0388	0.000307	6.48e-18	7.53e-18	0.00761	0.00741	4.01e-18	0.162	0.35	0.512
TCGA-EW-A2FV-01	Low	0.745394	0.0115	0.0133	4.3e-18	0.00621	0.0135	0.0674	0.0224	0.108	0.0481	0.0434	0.0403	0	0	6.29e-18	6e-18	0.0348	0.261	1.32e-18	0.0746	0.0913	0.166
TCGA-E2-A15T-01	High	1.47526	0.0226	0.00538	0	0.011	2.56e-19	0.00404	0.000947	0.0197	0.0117	0	0.0242	0	0	1.06e-17	4.49e-19	0.0639	0.125	0.00238	0.0403	0.01	0.0503
TCGA-PL-A8LZ-01	Low	0.74529	0.0475	0.017	0.015	0.0128	0.0623	0.134	0.0137	0.208	0.0656	0.0888	0.0463	0.0126	1.55e-18	0	7.22e-18	0.171	0.364	0	0.136	0.184	0.32
TCGA-A8-A06Z-01	High	1.47527	0	0	0	0	1.25e-19	0	0	0.0337	0.0354	0.0066	0.0382	0.00203	0.000724	1.64e-17	0	0.141	0.0385	3.98e-18	0.0367	0.0168	0.0535
TCGA-A8-A08G-01	High	1.47887	0.00574	0.000976	1.15e-18	0.0107	0.0104	0.022	0.00108	0.0101	0.063	0.0404	0.0501	0.00749	9.99e-05	0	0	0.0737	0.0953	0.00764	0.0736	0.0301	0.104
TCGA-AC-A2QH-01	High	1.47909	0	0	0	2.47e-19	0	0	0.00422	0.054	0.0208	0.00851	0.037	0.00874	0.00174	1.26e-19	9.47e-19	0.0823	0.271	8.43e-18	0.0274	0.135	0.162
TCGA-A2-A0EP-01	High	1.4808	0.229	0.0443	0.142	0.00434	0.13	0.218	0.227	0.196	0.127	0.0849	0.0988	0.151	3.01e-21	1.08e-17	0	0.0608	0.0695	0.0155	0.604	0.382	0.986
TCGA-BH-A201-01	High	1.48091	0	1.6e-19	0	0.00346	3.31e-18	0	0	0.0402	0.0187	0.000649	0.0458	8.55e-18	8.73e-20	8.39e-18	0	0.0162	0.0343	0	0.0175	0.0905	0.108
TCGA-C8-A1HI-01	High	1.48174	0	3.15e-19	6.4e-18	0.00878	0	5.89e-20	0.0013	0.0108	0.0227	0.00473	0.0323	0	0	0	0	0.0459	0.0379	3.94e-19	0.0235	0.0231	0.0466
TCGA-A2-A0YD-01	Low	0.744011	0	0.00262	2.84e-20	0	0.00607	0.047	0.0114	0.112	0.0273	0	0.0611	0.0123	0.001	4.75e-18	1.53e-19	0.0128	0.0366	6.05e-20	0.0532	0.202	0.255
TCGA-D8-A1Y1-01	High	1.48357	0	0	2.41e-19	2.32e-20	0	2.89e-19	2.63e-20	0.0095	0.0519	0.0213	0.0501	0.0231	0	9.4e-20	8.56e-18	0.102	0.101	3.11e-18	0.0556	0.0766	0.132
TCGA-BH-A0HA-01	Low	0.74268	1.34e-18	5.85e-05	0.00136	0.00621	0.0496	0.112	0.0107	0.0993	0.0301	0.021	0.037	9.14e-19	0	2.5e-20	1.1e-17	0.108	0.0537	1.11e-21	0.0619	0.1	0.162
TCGA-AR-A1AW-01	Low	0.739	0.693	0.137	0.142	0.0322	0.253	0.364	0.0646	0.0158	0.103	0.0659	0.051	0.036	0	0	0.0255	0.0874	0.294	0.0379	0.823	0.0343	0.858
TCGA-B6-A0IH-01	Low	0.738858	0	0	1.29e-19	0	0.0499	0.11	0.0115	0.212	0	0	0.0254	1.97e-18	0	4.85e-18	0	0.0162	0.0161	1e-17	0.0483	0.199	0.247
TCGA-B6-A0RE-01	Low	0.738619	0.0232	0	1.51e-17	2.67e-19	0	0	0	0	0.0151	0.00983	0.0378	0	3.42e-20	6.97e-18	0	0.0644	0.332	0	0.0303	0.00993	0.0402
TCGA-LL-A441-01	Low	0.737625	0.75	0.00735	0.102	0.0131	0.115	0.153	0.0297	0.047	0.00539	0.00608	0.0194	5.43e-18	1.6e-19	0	3.86e-18	0.0569	0.136	0	0.61	0.0876	0.697
TCGA-BH-A18P-01	Low	0.735483	0.00046	0.00309	9.51e-19	0	0	0.00739	0.00575	0.0161	0.0038	9.34e-19	0.0192	5.6e-18	1.77e-19	0	0	0.0685	0.125	0.00388	0.0162	0.0437	0.0598
TCGA-AC-A2QJ-01	High	1.48446	0	9.95e-19	0.0159	0.00698	0.00656	0.0282	0.0709	0.111	0.0679	0.0569	0.0798	0.18	0	9.54e-18	0	0.22	0.0425	1.34e-17	0.228	0.112	0.34
TCGA-BH-A0BZ-01	Low	0.732321	0.0243	0.007	0.0202	0.0161	0.0827	0.178	0.0126	0.0442	0.0963	0.0741	0.0652	0.00967	0	1.02e-18	1.09e-18	0.147	0.215	0	0.155	0.0423	0.197
TCGA-D8-A1XG-01	High	1.489	0.00112	0	0	2.05e-18	0	8.71e-19	0	0	0.00989	0.00507	0.0125	1.28e-17	1.06e-18	5.09e-19	1.16e-19	0.0263	2.44e-21	0	0.0251	0.0191	0.0442
TCGA-A2-A0D3-01	Low	0.730724	0.0532	0.0108	0	0.00677	0.0512	0.103	0.00834	0.00305	0.0147	0.000196	0.0304	0.000871	7.06e-20	0	1.66e-20	0.0573	0.0267	0.0182	0.108	0.00421	0.112
TCGA-A7-A3J0-01	Low	0.729802	0.0227	0.00126	0	0	0.00846	0.0276	0.00332	0.0111	0.0144	0.0122	0.0133	0	0	0	0	0.113	0.0105	0.0213	0.0386	0.00553	0.0441
TCGA-A2-A4RY-01	Low	0.728113	0.0182	3.23e-19	8.46e-19	0.00131	0	6.81e-20	0.00722	0.0903	2.44e-18	5.32e-18	0.0213	0	0	4.21e-18	0	0.0247	1.01e-17	5.87e-18	0.0218	0.21	0.231
TCGA-A2-A0CX-01	Low	0.727229	0.0106	0.00408	7.35e-19	2.18e-19	0	0.02	0.0124	0.043	0.0448	0.0226	0.0597	0.00595	0	9.84e-19	4.8e-19	0.0708	0.221	0	0.0545	0.0339	0.0885
TCGA-AO-A0JG-01	Low	0.72689	0.0541	0.0129	0.00526	0.0142	0.113	0.197	0.0215	0.11	0.00197	0	0.0249	0	0	6.15e-18	0.00458	0.0147	0.0456	0	0.144	0.0958	0.24
TCGA-LD-A66U-01	Low	0.724847	0.0275	0	0.00303	0.0125	0.0525	0.104	0.0104	0.0447	0.00262	0.00909	0.0288	2.34e-18	0	1.74e-18	1e-17	0.143	0.0136	1.97e-18	0.065	0.129	0.194
TCGA-BH-A0BQ-01	Low	0.723173	1.47e-19	0	0	0.00178	0.0317	0.0851	0.0222	0.0558	0.0195	0.0107	0.0334	0.00634	0.000382	0	6.45e-18	0.0592	0.0296	9.77e-19	0.061	0.127	0.188
TCGA-AN-A0XO-01	High	1.48983	7.66e-19	0	1.07e-17	0	0	0	0	0.0197	0	1.14e-20	0.00831	0	0	0	0	0.0733	0.0277	8.55e-21	0.00653	0.0308	0.0373
TCGA-AN-A0FF-01	Low	0.722361	0.034	0.00356	1.05e-20	3.97e-19	0.00518	0.0476	0.00839	0.0404	0.0552	0.0259	0.0543	0.000154	5.51e-21	0	0	0.0787	0.0767	0	0.0851	0.122	0.207
TCGA-E2-A14R-01	Low	0.721663	0.113	0.0133	0	0.00388	0.0502	0.112	0.0177	0.011	0.0711	0.0578	0.0319	0.00668	0	1.42e-18	0	0.228	0.219	0.0082	0.177	0.0101	0.188
TCGA-B6-A3ZX-01	Low	0.719468	0.688	0.0734	0.188	0.0195	0.243	0.289	0.0422	0.0282	7.2e-20	0.00739	0.0128	1.06e-18	0	0	0	0.0313	0.373	1.49e-17	0.675	0.0523	0.727
TCGA-E2-A1LK-01	Low	0.717713	0.00293	9.27e-20	0	0.00136	2.19e-19	0	0.000329	0	0.0415	0.0429	0.0363	0	0	2.75e-18	1.17e-17	0.127	0.198	0.0485	0.0349	3.91e-18	0.0349
TCGA-A7-A426-01	Low	0.717446	3.41e-18	1.41e-18	0	0.00942	5.85e-19	0.00602	0	0.142	0	1.61e-18	0.0226	0	2.82e-19	0	0	0.0814	4.82e-18	0	0.00813	0.254	0.262
TCGA-AC-A6NO-01	Low	0.716736	0	0	1.73e-17	0.000839	0	0	0.000674	0.0205	2.18e-20	1.24e-19	0.0101	0	8.23e-19	0	0	0.116	0.0367	1.09e-17	0.00489	0.0407	0.0456
TCGA-AR-A2LE-01	Low	0.716262	5.54e-19	0.00961	0	1.8e-22	0.0108	0.0392	0.00358	0.0817	0.0124	4.39e-20	0.0159	0	0	0	2.16e-18	0.0258	0.038	2.6e-19	0.0329	0.051	0.0839
TCGA-GI-A2C9-01	High	1.49489	0.0244	4.86e-21	0	8.27e-19	2.06e-19	0	0.0476	6.4e-19	0.027	0.0271	0.0188	0.00728	3.35e-22	0	7.78e-19	0.0188	0.198	0	0.0801	0.00544	0.0855
TCGA-BH-A0BM-01	Low	0.713116	0	0	0	0.0026	0	0.0207	0	0.0566	6.3e-20	9.45e-18	0.0332	4.64e-18	0	0	9.08e-18	0.0251	1.09e-21	1.75e-18	0.00365	0.248	0.252
TCGA-EW-A6S9-01	High	1.49654	0.00512	1.02e-19	0	0.00865	0	0.00917	0	0.0193	0.0231	0.0124	0.0231	0.00154	0.000112	0	0	0.11	0.059	0	0.0325	0.0236	0.0561
TCGA-B6-A40C-01	Low	0.712567	6.64e-20	0	1.47e-18	0.00514	4.16e-20	0.0135	7.07e-21	0.0696	0.0258	0.00335	0.0582	0.00364	0.000732	0	2.31e-18	0.137	0.0585	0	0.0246	0.155	0.18
TCGA-S3-AA12-01	Low	0.711921	0.00558	0	0	0.00182	0	0	0	0.0061	0.0084	1.52e-18	0.0216	0	1.48e-19	1.6e-17	7.65e-18	0.148	0.0326	4.54e-21	0.0184	0.00305	0.0215
TCGA-S3-A6ZF-01	Low	0.710227	0.0462	8.97e-22	0	7.38e-20	9.62e-19	0.00435	0.00878	0.0114	0.016	0.0046	0.0374	0	0	2.23e-19	1.32e-17	0.0374	0.144	5.79e-20	0.0576	0.016	0.0736
TCGA-A8-A07W-01	High	1.49831	0.0212	0.00659	0	0	9.71e-21	0.00559	0.00995	0.00964	0.0636	0.0193	0.0826	0.0254	0	0	0	0.1	0.149	0.000739	0.0956	0.0108	0.106
TCGA-S3-AA10-01	Low	0.709331	0.203	0.0306	0.0295	0.0191	0.122	0.222	0.0214	0.0249	0.076	0.0848	0.0353	0.00982	0	1.69e-18	0	0.232	0.532	0.0314	0.298	0.0124	0.31
TCGA-E2-A1B5-01	Low	0.706778	0.335	0.104	0.191	0.0138	0.267	0.361	0.052	0.139	0.0218	0.00492	0.064	2.34e-19	0	0	0.00089	0.0728	0.0851	0	0.503	0.219	0.723
TCGA-AN-A0FN-01	Low	0.706141	0.0953	0.035	0.0304	0.0147	0.101	0.19	0.0232	0.238	0.0363	0.0121	0.0626	0.0104	2.74e-20	3.87e-18	3.25e-18	1.06e-18	0.155	0	0.186	0.266	0.452
TCGA-A2-A0EQ-01	Low	0.705896	0.256	0.0606	0.0597	0.00775	0.151	0.251	0.0571	0.0425	0.0624	0.0474	0.0245	0.0185	0	0.00372	0.0168	0.162	0.312	0	0.39	0.0213	0.411
TCGA-OL-A66K-01	Low	0.7056	2.63e-18	0	4.83e-19	2.14e-19	5.74e-19	2.89e-19	0	0.0363	0.0106	9.3e-05	0.0201	0	0	0	0	0.0674	0	0	0.0144	0.0769	0.0913
TCGA-A7-A13H-01	Low	0.701279	0.019	3.79e-20	0	0.00629	0.000402	0.0744	0.0239	0.0312	0.0972	0.0498	0.0683	0.0183	4.51e-19	1.6e-18	0	0.0317	0.00884	1.75e-18	0.119	0.0816	0.2
TCGA-B6-A0IO-01	Low	0.700612	0.00952	0.0067	0	0.0099	0.0302	0.0459	0.00232	0.00218	0.0119	0	0.0239	8.12e-19	1.22e-20	0	1.31e-18	0.0765	0.0817	1.01e-19	0.0463	0.00109	0.0474
TCGA-AO-A125-01	Low	0.698077	0	0	0	0	0	0	5.47e-19	0.0269	0	0	0.0113	2.67e-18	9.19e-20	2.83e-19	0	0.104	0	0	0.0079	0.0135	0.0214
TCGA-S3-A6ZH-01	High	1.49951	0.0241	0	0	0	0.0207	0.0432	0.0169	0.015	0.0222	0.00979	0.0268	0	0	1.92e-17	3.19e-18	0.125	0.0669	2.21e-18	0.0753	0.00973	0.0851
TCGA-AO-A0JM-01	High	1.49998	0	2.99e-20	3.96e-19	0.0109	0	2.35e-19	0.0059	0.0263	0.0274	0.0184	0.0432	0	0	3.46e-19	1.76e-17	0.138	0.151	0.00169	0.0269	0.0336	0.0605
TCGA-BH-A208-01	High	1.50047	0	0	0	0.00634	0.00492	0.0192	0.00711	0.159	0.029	0.0172	0.0425	0	0	7.32e-18	1.89e-17	0.0089	0.0718	8.23e-19	0.0329	0.22	0.253
TCGA-A7-A0DB-01	High	1.503	0	0	3.66e-18	0	7.88e-18	1.07e-19	0.00283	0.0345	0.071	0.0156	0.117	0.00226	0.000727	8.53e-18	1.41e-17	0.0669	0.0302	0	0.0621	0.179	0.241
TCGA-A8-A08S-01	High	1.50604	0.00247	9.63e-21	0	0.00392	2.67e-18	0.00656	0.00527	0.00286	0.0279	0.00722	0.0292	2.94e-18	0	0	7.04e-18	0.0663	0.0931	6.16e-19	0.03	0.00978	0.0397
TCGA-A1-A0SI-01	Low	0.692746	0.00728	0	0	0.00691	0.0345	0.0762	0.00647	0.0121	0.0274	0.018	0.0335	1.63e-18	1.56e-18	0	0	0.0733	0.138	6.73e-19	0.0601	0.0677	0.128
TCGA-BH-A1EW-01	High	1.51087	1.05e-19	0.0178	1.82e-18	0.00554	0.00529	0.0358	0.0137	0.102	0.0231	0.00381	0.0403	0.0206	0.00106	1.27e-18	0	0.0153	0.137	0.0156	0.0609	0.112	0.173
TCGA-A7-A3IY-01	High	1.51176	0	1.2e-19	5.83e-19	0	0	0.00489	0.00921	0.0636	0.0928	0.0487	0.0551	0.0557	4.84e-19	1.68e-19	0	0.0424	0.0625	6.15e-19	0.112	0.0589	0.171
TCGA-E2-A152-01	High	1.51366	1.75e-19	0.00479	1.31e-19	0	0	0.00866	0.00367	0.0294	0.0321	5.76e-19	0.0512	0.0242	0	1.98e-18	2.87e-18	0.0541	0.0527	0.00552	0.0451	0.0147	0.0598
TCGA-AR-A24T-01	High	1.51459	0	3.62e-19	3.88e-19	0	0	0.025	1.07e-20	0.101	0.0226	0.000788	0.0487	1.21e-18	0.000182	9.23e-18	0	0.0149	0.0234	7.8e-19	0.0368	0.115	0.151
TCGA-A1-A0SF-01	Low	0.689922	0	0	0	0.00372	0.0559	0.14	0.0131	0.0524	2.12e-18	1.62e-18	0.0207	6.96e-18	0	2.35e-19	1.12e-17	0.0767	0.0637	0	0.0525	0.143	0.196
TCGA-AO-A0JB-01	Low	0.685448	0	2.28e-18	0	1.72e-19	0	0.019	0.0101	0.0921	0.0286	0.037	0.0306	0.00219	0	6.8e-18	0	0.162	0.0506	0	0.0324	0.0913	0.124
TCGA-BH-A1FC-01	Low	0.685026	0.165	0.0372	0	0.0159	0.0642	0.13	0.0159	0.00169	0.0551	0.0435	0.0382	0.00113	0	0	0	0.201	0.536	0.0424	0.216	0.0107	0.226
TCGA-E2-A15L-01	High	1.51619	0.00155	0.00242	0	0.000475	7.99e-19	0.00336	0	0.00746	0.021	0.00123	0.0282	0.00236	4.89e-20	0	1.72e-18	0.0432	0.0919	0.00837	0.0222	0.00453	0.0267
TCGA-E2-A1IN-01	High	1.51782	6.65e-19	7.7e-20	0	5.33e-05	2.12e-18	0	0	0.0266	0.0161	0	0.0344	1.04e-18	0.000225	0	0	0.0554	0.049	6.68e-19	0.0333	0.0551	0.0883
TCGA-BH-A0DH-01	Low	0.683888	0.033	3.45e-19	0	0	0	0.0339	0.000129	0.023	0.0233	9.5e-19	0.0559	0	1.18e-18	0	0	0.11	0.042	0	0.0498	0.116	0.166
TCGA-AO-A0JD-01	High	1.51812	2.57e-19	0.0113	9.53e-18	0.0051	4.46e-18	0.0329	0.0191	0.00974	0.031	0.0116	0.0321	3.88e-18	0	0	8.64e-19	0.153	0.211	0	0.0345	0.00487	0.0394
TCGA-BH-A0DP-01	Low	0.683371	0	0	0	0.00234	0.00491	0.0669	0.0033	0.0508	0.026	0	0.053	0	3.66e-20	1.21e-17	3.89e-18	0.0272	0.0418	0	0.0337	0.126	0.16
TCGA-A2-A3Y0-01	Low	0.682087	0.091	0.00219	9.66e-22	0.00538	0.0623	0.109	0.0312	0.00836	0.0303	0.0332	0.0216	0.0303	0	0	5.72e-20	0.301	0.35	0	0.169	0.029	0.198
TCGA-AO-A03R-01	Low	0.681507	0.0336	0.00489	2.17e-19	3.1e-19	0.0227	0.111	0.0298	0.096	0.0131	0.0111	0.0311	0	8.5e-19	0	4.61e-18	0.15	0.269	2.48e-17	0.0661	0.118	0.185
TCGA-E2-A576-01	High	1.5188	4.41e-20	0	2.16e-18	0.00581	3.83e-19	0.00491	0.00106	0.0406	0.00252	0.00326	0.034	0	0	0	0	0.265	0.0237	1.62e-17	0.00891	0.0778	0.0867
TCGA-BH-A209-01	Low	0.680567	0.306	0.0824	0.0228	0.0264	0.17	0.268	0.0534	0.0214	0.0906	0.078	0.045	0.00459	0	6.5e-18	0.0272	0.122	0.391	0.0197	0.442	0.0348	0.476
TCGA-EW-A1IW-01	High	1.51932	0.00232	0.00747	7.52e-19	0.00171	0	0.0262	0.00769	0.035	0.00638	4.63e-19	0.0242	3.2e-19	4.31e-20	0	0	0.0611	0.184	0	0.0154	0.108	0.123
TCGA-A8-A08B-01	High	1.5195	0.034	0.00409	8.69e-21	2.36e-20	0.00374	0.0443	0.00194	5.55e-19	0.00389	0.00699	0.0209	3.19e-18	3.43e-18	0	6.89e-18	0.18	0.157	2.13e-18	0.0391	0.00955	0.0486
TCGA-A7-A26E-01	High	1.52007	0	0.00325	1.34e-18	0.0098	2.72e-18	0.0192	0	0.0226	0.0209	4.63e-19	0.0302	0.00139	0.00237	3.85e-19	0	0	0.071	0.0108	0.0297	0.0662	0.0959
TCGA-E2-A1IL-01	Low	0.674669	0	0	1.93e-18	0.00247	1.21e-18	0.00332	2.93e-19	0.0359	0	1.4e-17	0.0294	0	2.01e-21	7.18e-20	1.69e-18	0.0462	0	0	0.00568	0.171	0.177
TCGA-D8-A1X7-01	High	1.52093	0.014	0.00845	1.36e-19	3.51e-20	0.000107	0.0169	0.000853	0.0311	0.0239	9.16e-05	0.0391	0	1.84e-20	0	0	0.0153	0.0893	0.0104	0.0411	0.0351	0.0763
TCGA-AC-A62Y-01	High	1.52629	0.00533	6.75e-21	0	0.000298	0	0.0223	0.00145	0.0311	0.0762	0.0333	0.0754	0.0134	0	3.83e-18	2.93e-18	0.0783	0.0311	0.00305	0.0696	0.109	0.179
TCGA-BH-A0DD-01	High	1.52688	0.000744	0.00586	0	0	0	0.0174	0.00184	0.00144	0.00991	0.00463	0.017	6.41e-18	0	9.19e-19	2.28e-18	0.0871	0.225	0.0106	0.0161	0.00472	0.0209
TCGA-D8-A27W-01	High	1.52761	0.0511	0.00882	1.91e-19	0.0109	0.0266	0.0523	0.00622	0.0274	0.0514	0.0198	0.0563	0.0105	0	2.27e-18	0	0.127	0.177	0	0.111	0.0222	0.133
TCGA-GM-A2D9-01	Low	0.670495	3.53e-19	0	0	0.00032	0	0.00147	0.00409	0.0636	0.0183	0.00769	0.0355	1.13e-19	1.02e-18	8.3e-18	8.34e-18	0.088	3.88e-20	9.86e-20	0.021	0.107	0.128
TCGA-B6-A0RM-01	High	1.53179	0.000305	0	1.71e-17	0.0144	0	0	0.00414	1.76e-19	0.0139	0	0.0291	2.56e-17	2.52e-19	0	0	0.0923	0.0293	0	0.0325	0.0119	0.0444
TCGA-E2-A155-01	High	1.53532	0.026	0.0108	0	4.99e-19	0	0.0159	0.00107	0.00192	0.000609	0	0.0137	0	1.46e-19	0	0	0.0387	0.206	2.98e-19	0.0387	0.0237	0.0625
TCGA-D8-A27R-01	High	1.53592	0.0113	0.00635	4.21e-19	0.0124	0.0328	0.0479	0.0123	0.0349	0.0605	0.0379	0.0752	0.0149	0	0	1.32e-17	0.0429	0.212	3.6e-18	0.103	0.0703	0.173
TCGA-D8-A1XT-01	High	1.53731	0.00717	0.00778	0	0.00328	0.0162	0.0231	0.00424	0.0595	0.0577	0.0442	0.0502	0.0309	0	0	0	0.0102	0.208	0.0068	0.0895	0.0547	0.144
TCGA-E9-A1NC-01	Low	0.66919	0.0669	0	0.00869	0.00482	0.0665	0.142	0.0243	0.0119	0.0693	0.0737	0.0188	0.0148	2.02e-19	0	6.85e-19	0.0803	0.232	4.15e-18	0.161	0.0497	0.211
TCGA-A8-A07G-01	High	1.53753	0.0165	3.3e-21	8.03e-19	0.0037	0.0184	0.034	0.00605	0.0214	0.0222	0.00422	0.0343	0.000363	0	0	3.31e-18	0.0174	0.0518	0	0.0494	0.0553	0.105
TCGA-AN-A0AK-01	High	1.53828	0.0228	0.00937	0	1.34e-19	2.8e-19	0.0103	0.00737	0.000443	0.0323	0.021	0.0386	4.75e-18	0	4.93e-17	0	0.136	0.225	6.98e-19	0.0513	0.000221	0.0515
TCGA-EW-A1P4-01	Low	0.669031	0.0531	0.0183	0	0.00165	0.0493	0.128	0.0452	0.0103	0.0183	0.0256	0.0158	0.0293	0.00413	0.0192	0	0.121	0.45	0	0.153	0.00516	0.158
TCGA-LL-A6FR-01	High	1.54239	3.67e-18	0	5e-18	0	0	2.11e-18	1.35e-18	2.07e-18	0.0175	0.0183	0.0148	0	0	9.91e-19	0	0.164	0.0825	1.16e-17	0.0117	0.0584	0.0701
TCGA-D8-A3Z5-01	Low	0.667384	0	0	4.31e-18	1.16e-19	1.24e-18	1.8e-18	2.38e-19	0.0988	0	0	0.019	2.48e-17	5.4e-21	4.99e-18	4.34e-18	0.0524	0	0	2.21e-17	0.218	0.218
TCGA-AC-A8OS-01	Low	0.66562	3.89e-19	1.54e-19	0.0114	0.00639	0.0145	0.0667	0.00899	0.15	0.00724	2.25e-19	0.0484	1.31e-18	0	0	0	0.0162	0.00419	4.31e-18	0.0446	0.24	0.285
TCGA-PE-A5DD-01	Low	0.66547	0	0	0	0.00947	0.0221	0.0677	0.000209	0.17	5.22e-20	3.06e-19	0.0314	1.87e-17	0	0	1.28e-17	0.13	0.0165	1.01e-18	0.0247	0.163	0.187
TCGA-EW-A1OV-01	Low	0.657902	0.345	0.082	0.0969	0.036	0.229	0.321	0.0427	0.0801	0.0523	0.0423	0.0248	0.0625	2.9e-18	0	0.0148	0.121	0.236	0	0.52	0.0701	0.59
TCGA-B6-A0IQ-01	Low	0.654822	0.0185	1.77e-20	2.05e-18	0.00517	0.00919	0.0287	0.0267	0.00904	5.92e-19	0	0.0078	6.69e-18	2.63e-18	0	6.61e-19	0.222	0.331	2.58e-18	0.0363	0.0292	0.0654
TCGA-A2-A4RW-01	High	1.54306	1.85e-20	0	0	2.05e-21	0.0181	0.0276	0.00475	0.0638	0.00317	1.73e-18	0.032	0	3.09e-19	1.12e-18	0	0.0813	0.0133	0	0.0464	0.103	0.149
TCGA-AN-A0AS-01	High	1.54464	0	5.04e-19	5.02e-18	0	1.13e-19	0	0.000555	0.0192	0.0691	0.0204	0.103	0.0124	0	5.22e-19	1.34e-18	0.067	0.0226	0.000718	0.0718	0.0564	0.128
TCGA-A8-A082-01	High	1.54641	0.00979	6.58e-20	0	0	0	4.9e-20	0.000277	0.0197	0.0457	0.00419	0.0599	0.0141	4.62e-05	0	4.3e-19	0.126	0.0734	0	0.0617	0.00983	0.0715
TCGA-AR-A24V-01	High	1.55081	0	9.39e-21	1.26e-18	0.00593	5.82e-19	1.2e-19	2.61e-20	0.0259	0.052	0.0216	0.0485	0.0302	0.00113	0	0	0.0244	0.0625	0.0063	0.0753	0.0946	0.17
TCGA-EW-A6SD-01	Low	0.653298	0.0945	0.00747	0	0.017	0.0254	0.0657	0.0136	0.0288	0.0443	0.0417	0.0372	0.0269	0	0.003	0	0.0721	0.0894	0.0183	0.145	0.0169	0.162
TCGA-A2-A0YT-01	High	1.55696	0	0.0114	1.16e-17	0.000785	3.52e-19	0.0202	0.012	0.0463	0.0364	0.0286	0.0405	0.00432	9.28e-20	6.44e-18	0	0.075	0.264	0	0.0444	0.0394	0.0839
TCGA-BH-A1F8-01	High	1.57632	0.0184	0.0202	0	0	0.00485	0.0496	0.00182	0.00636	0.0158	0	0.0301	4.75e-19	0	0	1.02e-18	0	0.261	0	0.0344	0.00887	0.0433
TCGA-AR-A0TZ-01	High	1.57685	0.000726	0.00453	0	0.0111	0.00579	0.0114	0.000435	0.00298	0.00349	0.00234	0.00814	0	1.1e-19	1.56e-18	4.42e-19	0.0751	0.129	0.0106	0.0222	0.0366	0.0588
TCGA-AC-A3W7-01	Low	0.65203	6.55e-18	0	3.62e-19	0.00347	0	0.00676	0.00217	0.0474	1.49e-19	0	0.0175	1.2e-17	0	5.97e-18	1.54e-17	0.0557	0	0	0.00758	0.115	0.123
TCGA-EW-A1J6-01	Low	0.652019	0.0738	0.0175	5.84e-19	0.00334	0.0636	0.0808	0.0124	0.0448	0.0452	0.0358	0.0475	0.00707	1.55e-18	0	2.75e-19	0.123	0.141	0.0445	0.14	0.0312	0.171
TCGA-A2-A0SW-01	Low	0.65069	0.155	0.00782	0.00267	0.011	0.0887	0.203	0.0221	0.0251	0.0669	0.0396	0.0692	0	0	0	0.000794	0.112	0.216	9.68e-19	0.23	0.037	0.267
TCGA-A7-A6VY-01	Low	0.649502	0.0688	0.00336	2.25e-18	0.00681	0.0109	0.0501	0.0456	0	0.0575	0.0634	0.0295	0.0131	0	6.37e-18	0	0.175	0.2	0.017	0.134	0.0225	0.156
TCGA-E9-A5FK-01	Low	0.64936	0.233	0	0.084	0.0175	0.158	0.299	0.0465	0.169	0.0189	0.0183	0.0597	4.38e-18	0	5.65e-18	3.35e-18	0.173	0.0109	2.97e-17	0.306	0.175	0.482
TCGA-E9-A1NI-01	High	1.57728	1.74e-18	0	0	0.00764	0	5.2e-18	0	0.027	0.0235	0.00584	0.0333	0	1.33e-19	2.72e-19	0	0.0993	0.0893	0	0.0224	0.0308	0.0532
TCGA-D8-A1JH-01	High	1.58048	1.11e-19	0.00421	0.0011	0.00477	0.00909	0.0298	0.019	0.068	0.036	0.00955	0.0503	0.0199	0	4.81e-18	0	0.0107	0.0272	0.00525	0.0762	0.0928	0.169
TCGA-E9-A1QZ-01	Low	0.647283	0.176	0.0159	0.0109	0.00949	0.0864	0.169	0.0229	0.0784	0.0133	0	0.0602	1.65e-19	0	4.29e-18	0	0.0225	0.151	0	0.207	0.249	0.457
TCGA-BH-A1ES-01	High	1.58136	7.04e-19	0.0011	4.26e-18	0.0236	0.0057	0.00247	0	0	0.00354	7.59e-19	0.0121	0	0	0	0	0.0333	0.122	0.00361	0.0175	0.0157	0.0332
TCGA-AC-A3BB-01	Low	0.646805	0.0844	1.21e-18	0.031	0.00633	0.0963	0.165	0.0379	0.115	0.0285	0.0148	0.0633	0.0238	2.41e-19	2.88e-18	9.85e-18	0.0699	0.0109	0	0.185	0.267	0.452
TCGA-AC-A62V-01	High	1.58416	0	0	1.19e-18	2.71e-20	1.1e-18	0	0.00601	0.0524	0.03	0.0174	0.0659	0.0213	3.68e-19	6.67e-18	0	0.198	0.0874	0	0.0498	0.0689	0.119
TCGA-AO-A1KT-01	High	1.58809	0	3.12e-19	0	0.0106	0	6.4e-19	0	0.0342	0.0441	0.00838	0.0556	0.0291	0	2.56e-18	4.22e-18	0.0889	0.132	6.35e-18	0.0571	0.0335	0.0906
TCGA-AR-A1AV-01	High	1.59944	0.0158	0	0	5.06e-19	6.78e-19	1.14e-20	0.000306	0.03	0.0232	9.34e-19	0.0477	0	1.44e-19	6.99e-18	2.23e-18	0.0365	0.034	0.005	0.0396	0.0157	0.0552
TCGA-C8-A134-01	Low	0.645834	0.0187	0.0046	2.28e-18	0.0041	0.0417	0.0768	0.0227	0.0193	0.0336	0.0333	0.0185	0.00517	0	0	0	0.105	0.332	0.0331	0.0813	0.0153	0.0966
TCGA-OL-A5RX-01	Low	0.644031	0.0112	2.35e-19	0	0.00249	4.2e-19	0.0108	0.00316	0.0386	0	3.8e-18	0.0192	0	1.81e-19	4.45e-18	5.69e-18	0.0428	1.29e-18	0	0.0128	0.0889	0.102
TCGA-A8-A0A6-01	Low	0.641017	0.0915	0.0222	0.00127	0.017	0.129	0.215	0.0284	0.0515	0.0655	0.0213	0.0688	0.00804	0	2.23e-18	0.0041	0.00728	0.119	2.15e-18	0.227	0.0561	0.283
TCGA-3C-AALJ-01	Low	0.640744	0.0409	1.36e-19	0.00359	0.0107	0.075	0.106	0.0143	0.0653	0.0235	0.0115	0.0523	0.0139	2.85e-18	1.41e-20	3.48e-19	0.102	0.167	1.11e-18	0.118	0.0827	0.2
TCGA-EW-A3E8-01	Low	0.638494	0.117	1.5e-19	0.0143	0.00655	0.0579	0.148	0.0116	0.078	0.0248	1.42e-20	0.0539	3.21e-18	0	1.71e-18	2.32e-18	0.0943	0.0214	0	0.153	0.19	0.343
TCGA-A8-A076-01	High	1.60021	0.0195	0	1.73e-18	0.000295	9.08e-19	0.0121	0.00588	0.0154	0.0717	0.0369	0.084	0.0124	0	0	0	0.0498	0.17	0.00157	0.0913	0.0216	0.113
TCGA-EW-A1IX-01	Low	0.638176	0	0	0	0.00655	1.01e-19	0.00823	0.0308	0.0285	0.0209	0.00091	0.0383	3.05e-19	0.000914	0	0	0.0273	1.24e-18	0.011	0.057	0.111	0.168
TCGA-EW-A2FS-01	Low	0.637217	0.0879	0.00392	6.26e-18	0.00985	0.034	0.0769	0.0115	0.0521	0.0144	0.00336	0.0187	9.46e-21	1.98e-19	0	0	0.0661	0.116	0	0.0986	0.0552	0.154
TCGA-A2-A0CQ-01	Low	0.6365	0.00675	3.99e-19	2.75e-18	0	0	3.11e-18	6.58e-20	0.018	0.0377	0.0108	0.0461	0.00194	2.15e-19	0	0	0.101	0.014	8.73e-20	0.0389	0.0438	0.0827
TCGA-E9-A227-01	Low	0.634457	0.00801	0.00466	0.00422	0.00628	0.0527	0.121	0.0783	0.0896	0.0433	0.0244	0.035	0.00822	1.23e-18	0	0	0.0624	0.0994	1.03e-18	0.135	0.0965	0.231
TCGA-E2-A10C-01	Low	0.633017	0.0352	0.00538	0.0124	0.0064	0.0504	0.112	0.0113	0.0175	0.0405	0.02	0.0456	0.00886	0	1.21e-19	1.04e-17	0.166	0.0567	0.0227	0.103	0.0609	0.164
TCGA-E2-A9RU-01	High	1.60234	6.29e-19	1.37e-19	1.74e-17	0	0	0	0	0.00186	0.0414	0.0321	0.0347	0.0045	0	0	2.14e-19	0.211	0.0492	0	0.035	0.0416	0.0767
TCGA-BH-A1F0-01	High	1.60487	0.217	0.0332	0	0.00484	0.0843	0.164	0.0621	0.119	0.158	0.107	0.114	0.0955	0	0	0	0.0313	0.274	0	0.42	0.136	0.556
TCGA-AR-A2LR-01	High	1.61161	0	3.7e-19	3.12e-18	0.00448	0.0103	0.00752	0.0122	0.0477	0.00476	0.00758	0.0219	0.0195	0.00248	6.26e-18	4.54e-18	0.122	0.148	3.44e-18	0.0401	0.1	0.14
TCGA-B6-A0WW-01	High	1.61369	0	0.00131	1.53e-18	0.000186	1.52e-19	0.0192	0.000763	0.0267	0.0207	0.00829	0.0245	7.38e-20	1.64e-19	0	2.4e-21	0.0691	0.077	0.00307	0.0242	0.0516	0.0757
TCGA-AN-A046-01	Low	0.631541	0.0161	0.0101	0.0261	0.0243	0.0816	0.127	0.0213	0.0264	0.0425	0.0268	0.0529	1.63e-18	0	2.25e-19	3.15e-18	0.133	0.101	0.0252	0.119	0.067	0.186
TCGA-OL-A5D7-01	Low	0.629791	0.244	0.00194	0.00585	0.0297	0.0949	0.157	0.0241	0	0.0485	0.0536	0.0482	6.55e-19	8.78e-19	5.62e-18	4.39e-18	0.344	0.412	0.0254	0.276	1.43e-18	0.276
TCGA-D8-A1XY-01	High	1.61879	2.18e-18	2.14e-19	9.8e-19	0.00468	0	0	0.00271	0.0361	0.0271	0.0124	0.0393	0	1.36e-20	7.49e-18	0	0.0369	0	0.00872	0.0364	0.0775	0.114
TCGA-A8-A07I-01	High	1.62385	0.0372	0.00366	0	0	0.00461	0.0213	0.00821	0.0133	0.0567	0.0322	0.0561	0.00693	5.53e-20	2.58e-19	1.6e-18	0.0588	0.146	0.0116	0.0978	0.00918	0.107
TCGA-BH-A18V-06	Low	0.628292	0.218	0.0355	0.0934	0.00725	0.173	0.254	0.0265	0.00288	0.0788	0.0732	0.0408	0.0391	6.92e-20	0	0.0216	0.199	0.191	0	0.373	0.0322	0.405
TCGA-E9-A1NF-01	High	1.62963	8.7e-19	0	0	0.00351	0.000558	0.0228	0.00143	0.11	0.0557	0.0335	0.0508	0.0114	0	0	0	0.0517	0.0413	0.00412	0.0509	0.156	0.207
TCGA-LL-A6FP-01	High	1.63279	3.31e-19	4.93e-19	4.46e-18	1.77e-19	3.91e-18	0	0	0.0142	0.00132	1.86e-18	0.0253	9.75e-18	0	5.38e-17	6.68e-18	0.145	1.57e-17	3.56e-18	0.00486	0.00712	0.012
TCGA-B6-A0X0-01	Low	0.627507	3.56e-20	0	0	0	0	0.00119	0.00116	0.0089	6.97e-19	0	0.0109	0	6.85e-19	6.12e-18	0	0.12	0.019	0	0.00785	0.00445	0.0123
TCGA-D8-A1XD-01	High	1.63496	0	0.00679	6.64e-18	0.00975	0.0104	0.00863	6.11e-20	0.0131	0	0	0.00528	1.07e-18	0	5.07e-20	2.08e-19	0.0588	0.0659	0.00858	0.027	0.0243	0.0513
TCGA-AR-A251-01	High	1.63883	0	0.013	6.19e-18	0.0167	0.00121	0.023	0.00902	0.00762	0.0166	0.00557	0.0308	0.0018	7.7e-20	0	0	0.0472	0.25	0.00816	0.0308	0.0379	0.0687
TCGA-LL-A5YN-01	Low	0.624207	0.407	1.16e-20	0.0803	0.0127	0.121	0.234	0.0582	0.00961	0.0382	0.0428	0.0383	4.78e-19	5.11e-18	1.02e-18	0	0.285	0.0263	1.8e-17	0.422	0.00885	0.43
TCGA-GM-A3NY-01	Low	0.623116	3.53e-18	9.09e-19	0	0.000589	0	0.0116	0.00152	0.043	0	0	0.0313	0	1.69e-20	1.59e-18	3.63e-18	0.0838	0.00529	3.68e-21	0.00153	0.0851	0.0867
TCGA-BH-A0BO-01	High	1.64148	0	0	0	5.21e-19	0	9.81e-18	0.00304	0.169	0	3.38e-21	0.0479	0.103	0.0379	1.22e-17	1.39e-18	7.39e-19	0.0014	2.53e-19	0.104	0.3	0.403
TCGA-AR-A0TP-01	High	1.64301	0	5.31e-20	5.2e-19	0	2.66e-18	1.55e-17	0	0.00353	0	0	0.0119	5.1e-18	0.000592	5.22e-19	2.35e-18	0.0778	0.109	0	0.00584	0.00177	0.0076
TCGA-D8-A1J9-01	High	1.64382	0	9.73e-05	2.06e-18	0	0	0.0039	0.00272	0.0189	0.0589	0.0141	0.0625	0.00534	0.00187	5.47e-19	8.23e-19	0.0528	0.127	0.00152	0.0603	0.0127	0.073
TCGA-AO-A0J9-01	Low	0.614941	7.18e-19	9.82e-20	0	0	0.0181	0.0841	0.0193	0.172	0.0745	0.0146	0.145	0.011	2.59e-19	7.01e-18	0	0.108	0.112	0	0.0819	0.362	0.444
TCGA-AO-A0JJ-01	Low	0.614142	0.0475	0.0133	1.21e-20	1.76e-21	0.0565	0.171	0.0125	0.0853	0.0233	0.00655	0.0554	0.0164	5.3e-05	7.13e-18	3.47e-18	0.0075	0.11	0	0.117	0.209	0.326
TCGA-B6-A1KN-01	High	1.6499	0.00269	0.0134	2.07e-18	0.00155	0.00377	0.0134	0.00709	0.0434	0.0162	0.00192	0.034	0	0	0	1.64e-18	0.0308	0.246	0	0.0263	0.0336	0.0599
TCGA-OL-A66P-01	Low	0.612704	0.236	1.68e-20	0.00381	0.00807	0.182	0.277	0.0538	0.0732	0.0992	0.0781	0.0839	0.0289	0	0	2.47e-17	0.243	0.188	1.16e-17	0.406	0.0612	0.467
TCGA-A2-A0CK-01	Low	0.612157	0	8.2e-19	5.04e-18	0.0118	1.86e-19	0.0389	0	0.0826	2.98e-18	0	0.0393	3.96e-18	4.73e-19	2.32e-18	0	0.0927	0.0422	0	0.00259	0.213	0.216
TCGA-AR-A1AQ-01	Low	0.611229	0.16	0.0269	0.00579	0.0121	0.077	0.163	0.064	0.0146	0.0756	0.0664	0.0498	0.0206	0	1.03e-18	1.7e-19	0.073	0.65	0	0.279	0.0266	0.306
TCGA-BH-A0BT-01	Low	0.602881	0	0	0	0.0203	0.0156	0.046	0.0167	0.0227	0.0163	0.00579	0.0321	7.68e-18	0	6.8e-18	0	0.178	0.0224	4.63e-18	0.0395	0.0464	0.0859
TCGA-OL-A5RW-01	High	1.65187	0	2.64e-18	1.74e-17	0.00506	0	0	1.67e-19	0	0.0331	0.0367	0.0304	6.78e-20	0	0	0	0.195	0.176	2.24e-17	0.0221	0.0153	0.0374
TCGA-C8-A1HK-01	High	1.65448	0.0221	0.0116	6.58e-18	0.012	0.0108	0.0137	0.00375	0.0213	0.0119	0.000477	0.034	6.2e-18	1.82e-18	3.52e-18	0	0.0942	0.215	1.34e-19	0.0424	0.0107	0.0531
TCGA-C8-A26X-01	Low	0.599425	0.133	0.00147	0	0.00679	0.0624	0.162	0.0524	0.11	0.121	0.0761	0.0937	0.0244	0	1.15e-18	0	0.176	0.186	1.48e-18	0.27	0.0745	0.344
TCGA-D8-A1XS-01	High	1.66525	0.011	0.0085	0	0.0137	2.23e-19	0.0234	0.00401	0.0188	0.0418	0.00469	0.0533	0	1.16e-20	4.81e-18	0	0.0523	0.129	0.00199	0.0585	0.0176	0.0761
TCGA-E9-A1R0-01	Low	0.598019	0.0159	0	0	0	1.29e-18	0.035	0.00287	0.0917	0.00674	9.73e-19	0.0455	1.36e-17	4.66e-19	2.05e-18	1.17e-18	0.0473	0.0603	1.02e-18	0.0301	0.252	0.282
TCGA-A8-A08Z-01	High	1.66647	0.00162	0.00885	1.91e-18	0.00874	0.00382	0.0226	0.00114	0.0354	0.104	0.034	0.0877	0.0491	1.11e-19	2.71e-19	6.53e-19	0.0415	0.0441	0.00654	0.124	0.0927	0.216
TCGA-AO-A1KS-01	High	1.66874	0.00108	0.0368	2.15e-18	0.00918	0	0.0515	0.0118	0.00698	0.0125	0	0.0352	0.00141	0.00828	5.4e-18	3.9e-18	0	0.334	0.0222	0.0574	0.0282	0.0856
TCGA-E2-A14N-01	Low	0.596282	0.0494	0.0336	0	0.000722	0.0171	0.0652	0.0203	0	0.0229	0.026	0.0169	0	1.1e-19	9.6e-18	5.49e-19	0.0678	0.623	0	0.0772	0.00285	0.08
TCGA-E9-A1R2-01	Low	0.595439	0	0.00256	0	0.00548	0.0286	0.0452	0.00628	0.0408	0.00665	2.93e-19	0.0478	0	0	0	4.04e-19	0.0438	0.0493	1.32e-19	0.0367	0.0958	0.132
TCGA-E9-A1NG-01	High	1.66961	0.016	0.00254	1.08e-19	0.00307	3.6e-20	0.00754	0.0327	0.0965	0.0655	0.0258	0.0463	0.0708	4.68e-19	3.54e-18	3.6e-18	0.0236	0.0256	0.0074	0.136	0.12	0.257
TCGA-BH-A0BF-01	Low	0.594133	0.126	0.0168	0.0315	0.0174	0.146	0.241	0.0318	0.0451	0.097	0.0734	0.0591	0.0284	0	2.34e-19	4.22e-19	0.119	0.157	0.00282	0.313	0.0924	0.406
TCGA-E9-A22D-01	Low	0.59277	0.155	0.0222	0.0245	0.0385	0.324	0.372	0.0279	0.0139	0.0891	0.0617	0.0505	0.0155	0	0.00198	0.00324	0.26	0.399	0	0.426	0.00696	0.433
TCGA-AQ-A54O-01	Low	0.589802	0.0237	1.91e-19	0	0.00586	0.0084	0.0342	0.00343	9.7e-19	0.0332	0.0169	0.0428	0	0	0	0	0.0939	0.0348	0	0.0496	0.0476	0.0971
TCGA-A2-A0CV-01	Low	0.579884	0	0	1.39e-18	0.0184	0.00504	0.0455	0.00706	0.0565	0.0107	0.000721	0.0392	0	1.37e-18	7.68e-18	2.13e-18	0.0248	0.0425	2.23e-18	0.0172	0.1	0.117
TCGA-A8-A09K-01	Low	0.577831	0.0811	0.0202	0	0.0198	0.0973	0.119	0.0168	0	0.0271	0.0108	0.034	0.0111	0	8.59e-20	0.0122	0.113	0.12	8.96e-19	0.196	5.89e-20	0.196
TCGA-AO-A03T-01	Low	0.575323	7.92e-20	0	0	0	9.13e-19	0.0318	0.0149	0.0476	0.00248	0.00113	0.018	2.06e-17	0	0	0	0.134	0.083	1.9e-17	0.0116	0.0704	0.082
TCGA-BH-A0B6-01	Low	0.57438	0.253	0.0025	0.0648	0.00697	0.199	0.391	0.0513	0.0791	0.04	0.0361	0.0265	0.0541	0	7.17e-18	0.0149	0.143	0.04	2e-18	0.404	0.097	0.501
TCGA-AO-A0J2-01	Low	0.572558	0.00903	0	3.44e-18	0.00807	1.37e-19	0.0361	0.0215	0.00852	0.0211	0.0227	0.0246	0	3.12e-18	2.2e-18	0	0.163	0.241	3.94e-18	0.0344	0.0249	0.0593
TCGA-BH-A0H5-01	Low	0.571427	0.505	0.0873	0.141	0.0281	0.337	0.492	0.074	0.0357	0.0552	0.0305	0.0463	0.0284	0	0	0.0123	0.0776	0.18	0	0.686	0.0897	0.776
TCGA-E2-A1L8-01	Low	0.569797	0.0135	0.0051	0	0.00459	0.00725	0.0403	0.0197	0.035	0.00133	2.03e-18	0.0196	0	0	8.74e-18	3.89e-19	0.0302	0.0967	0.00358	0.0317	0.174	0.205
TCGA-E9-A3HO-01	Low	0.566238	0.000704	0.0114	1.14e-19	9.99e-21	0.0191	0.0561	0.00832	0.0726	0	0.00184	0.0275	0	0	0	0	0.181	0.0777	7.04e-18	0.0195	0.0811	0.101
TCGA-E2-A1LA-01	Low	0.565846	0.107	0.0132	0	0.0203	0.0685	0.174	0.0301	0.00281	0.0704	0.0516	0.0429	0.00175	0	0	0	0.175	0.174	9.92e-19	0.198	0.044	0.242
TCGA-BH-A0B9-01	Low	0.56529	0.15	0.0169	0	0.027	0.145	0.216	0.0456	5.88e-19	0.0354	0.0199	0.0241	0.00162	0	2.7e-19	7.48e-18	0.119	0.516	3.24e-18	0.252	0.0328	0.285
TCGA-E2-A1II-01	Low	0.559549	0.234	0.0833	0.0424	0.0215	0.235	0.294	0.0366	0.0159	0.0887	0.0882	0.0412	0.0394	2.34e-19	0.0301	1.85e-19	0.186	0.725	0	0.472	0.00797	0.48
TCGA-EW-A1PB-01	Low	0.558489	0.0659	0.0154	0.0292	3.65e-22	0.0674	0.201	0.0566	0	0.128	0.139	0.0224	0.0725	1.72e-19	0.0169	0	0.264	0.24	0	0.277	0.0174	0.294
TCGA-AO-A1KR-01	Low	0.557843	3.24e-20	5.2e-18	0	0.00278	7.23e-22	0.0308	0.00145	0.0273	0	0	0.00725	4.99e-18	0	0	1.48e-17	0.307	0.298	0	0.000968	0.0265	0.0274
TCGA-LD-A7W6-01	Low	0.548112	0	0	5.9e-18	0.000664	0	0.0383	4.42e-19	0.0505	0	1.21e-18	0.0234	7.48e-18	0	0	0	0.0577	0.0431	0	0.00854	0.101	0.109
TCGA-AO-A0JC-01	Low	0.541443	1.3	0.339	0.311	0.0695	0.505	0.578	0.16	0.0804	0.0173	0	0.0183	0.0905	2.44e-18	2.72e-19	0.0443	0.0784	0.225	0.0662	1.51	0.107	1.61
TCGA-E2-A1LE-01	Low	0.537617	1.84e-18	7.03e-19	0.015	0.00263	0.073	0.148	0.0174	0.157	0.0322	0.0187	0.0551	0	2.58e-18	2.22e-18	5.59e-18	0.11	0.122	3.13e-18	0.0817	0.217	0.299
TCGA-GM-A2DD-01	Low	0.534769	0.0698	0.0235	0.0455	0.00999	0.105	0.196	0.0632	0.0922	0.107	0.0731	0.0747	0.0354	3.89e-19	4.33e-18	1.09e-17	0.104	0.154	0.0164	0.259	0.108	0.366
TCGA-D8-A1XJ-01	High	1.68172	0	0	0	3.57e-21	0	0.0111	0.000147	0.0144	0.024	0.00635	0.0411	0	0	4.44e-19	0	0.218	0.121	5.33e-19	0.0235	0.0209	0.0443
TCGA-AC-A3YI-01	High	1.68352	0	0	0	0.00609	1.6e-18	2.79e-18	0.00685	0.115	0.0214	0.0078	0.0466	0.0181	0.00399	1.66e-18	0	0.0285	0	0	0.0411	0.152	0.193
TCGA-C8-A12U-01	Low	0.532472	0.0456	0.0154	0	0.0285	0.0836	0.13	0.0143	0.0166	0.035	0.0281	0.0404	5.42e-20	6.15e-19	5.54e-05	1.77e-18	0.252	0.225	0	0.13	0.0083	0.139
TCGA-EW-A1PC-01	High	1.69099	6.24e-19	0	1.17e-17	0.00265	5.01e-18	0	0	0.00312	0.00102	0.00198	0.0159	9.06e-18	0	1.85e-18	3.01e-18	0.182	0.223	1.05e-17	0.00246	0.00156	0.00402
TCGA-AR-A1AI-01	Low	0.530983	0.167	0.0472	0.00765	0.00686	0.09	0.156	0.0518	3.54e-19	0.0708	0.0329	0.049	0.0356	0	0	0	0.102	0.58	0.00409	0.299	3.16e-19	0.299
TCGA-C8-A12V-01	Low	0.526322	0.33	0.0678	0.0949	0.0229	0.233	0.372	0.119	0.0464	0.0904	0.086	0.0488	0.0454	0	0.0194	0.00604	0.157	0.414	0	0.585	0.0232	0.608
TCGA-BH-A1EO-01	High	1.72144	0	0.0144	0.00157	1.93e-19	1.54e-22	0.033	0.012	0.0645	0.0737	0.0172	0.0843	0.0212	0.000655	0	0	9.4e-18	0.107	0.00639	0.105	0.142	0.247
TCGA-B6-A0WZ-01	Low	0.526283	2.16e-18	5.2e-20	3.84e-18	0	3e-18	2.87e-19	0	0.0349	0.00375	5.81e-20	0.0117	0	0	0	2.17e-17	0.128	0.00503	3.53e-19	0.00574	0.0457	0.0515
TCGA-AR-A24S-01	High	1.73399	0.0391	0.0191	0	0.00152	0	0.0182	0.0524	0.0434	0.141	0.0732	0.111	0.0325	0	2.52e-18	0.00536	0.0345	0.12	0.0205	0.196	0.107	0.303
TCGA-A8-A08I-01	Low	0.524957	0.109	0.0213	2.02e-19	0.0251	0.151	0.223	0.0727	0	0.167	0.0839	0.0721	0.0365	0	0	0.0186	0.0886	0.199	1.52e-17	0.376	4.05e-19	0.376
TCGA-A1-A0SK-01	High	1.73659	1.57e-18	4.3e-20	0	0.014	0	1.33e-21	0	4.52e-19	0	0	1.91e-19	0	1.32e-19	1.79e-18	1.42e-17	0.18	0.243	0	0.00265	6.98e-19	0.00265
TCGA-BH-A1FD-01	High	1.74238	0.00469	0.00373	0	0.0103	0	0	0.000912	0.00537	0.0411	0.023	0.0325	4.59e-19	1.76e-22	0	0	0.0704	0.105	0.0365	0.0411	0.0333	0.0744
TCGA-AR-A1AX-01	Low	0.52258	0.267	0.0424	0.0838	2.43e-20	0.136	0.223	0.0152	0.0554	0.0219	0.016	0.0324	0.00116	0	0	0.0045	0.0561	0.117	1.94e-19	0.332	0.0614	0.393
TCGA-GM-A3XL-01	Low	0.518574	0.0786	0.00702	2.08e-18	0.00984	0.0677	0.125	0.0568	1.28e-18	0.0553	0.0381	0.0419	0.00946	2.35e-18	6.94e-18	0	0.262	0.419	9.22e-18	0.181	0.0457	0.227
TCGA-A8-A06R-01	High	1.74487	0.0527	0.0157	2.69e-18	0.0191	0.00529	0.04	0.00957	0.0786	0.0475	0.0319	0.0555	0.0268	1.2e-18	0	1.41e-19	0.0564	0.108	0.0212	0.107	0.0864	0.193
TCGA-BH-A1EV-01	High	1.7465	8.91e-19	1.41e-19	0	0.00318	1.4e-18	0	1.31e-19	0.0109	0.0123	0	0.022	1.9e-18	1.36e-19	0	8.66e-18	0.113	0.0637	1.63e-19	0.0181	0.0223	0.0404
TCGA-C8-A26Z-01	High	1.75807	0.00752	0.000996	2.13e-18	0.0154	0.0143	0.0048	7.62e-22	0.00877	0.0103	0	0.0204	0	1.69e-20	0	0	0.0731	0.0904	0	0.0347	0.0046	0.0393
TCGA-BH-A1FN-01	High	1.77439	0	0.00235	0	1.03e-20	0	0	0	0.0136	0.019	0.0167	0.0196	2.81e-19	0	3.45e-19	0	0.0817	0.161	7.66e-19	0.0273	0.0339	0.0612
TCGA-E9-A1RC-01	High	1.77542	0.0168	0	0	0	9.91e-19	3.85e-18	0	8.19e-20	0.00276	2.62e-18	0.0211	0	1.85e-19	0	0	0.0499	0.0483	0	0.0195	0.0151	0.0346
TCGA-D8-A1JD-01	High	1.77882	0.0196	0.0122	0	0.000599	8.73e-22	0.0144	0.00712	0.00343	0.0739	0.031	0.0577	0.0151	1.35e-19	3.79e-18	1.04e-18	0.0592	0.216	0.0154	0.104	0.0339	0.138
TCGA-AO-A03O-01	High	1.77984	0.0602	0.0205	3.79e-18	0.0143	0.034	0.0476	0.0159	0.0101	0.0439	0.0345	0.0397	0	0	7.4e-18	0.0136	0.109	0.188	0.0359	0.114	0.00647	0.12
TCGA-E9-A1N6-01	High	1.78432	0.00088	0.00181	4.11e-18	0.00162	0	0.00461	0.00246	0.0253	0.0488	0.0245	0.0532	0.0076	0	0	0	0.0722	0.165	0	0.049	0.0143	0.0633
TCGA-C8-A137-01	High	1.78515	0	0.00327	6.14e-18	0.00413	3.04e-20	0.000409	0	0.00967	0.00938	0.000195	0.0236	6.88e-19	0	0	0	0.109	0.178	0	0.00984	0.00925	0.0191
TCGA-BH-A1EY-01	High	1.7919	0.0293	0.0226	0.0138	0.00292	0.0305	0.0867	0.0433	0.00709	0.0853	0.0447	0.0774	0.0355	2.94e-21	2.43e-19	0	0.026	0.0537	0.0301	0.175	0.0743	0.249
TCGA-A8-A07B-01	High	1.80296	2.9e-19	0.00602	1.12e-18	0.00686	2.16e-18	0.00548	0.00516	0.0256	0.00881	0.000696	0.0321	0	0.00024	5.7e-18	0	0.0567	0.105	0.00282	0.0228	0.0357	0.0585
TCGA-E9-A226-01	High	1.80646	0	0.0111	0	0.00503	0	0.00619	3.28e-20	0.00123	0.0136	2.18e-18	0.0237	0.00529	0.000285	8.7e-19	0	6.76e-18	0.155	0.0123	0.0337	0.0711	0.105
TCGA-LD-A9QF-01	Low	0.512304	0.122	0.0212	0.0726	0.00559	0.13	0.204	0.045	0.125	0.177	0.131	0.0902	0.0385	0	2.58e-19	0	0.0292	0.221	0.00853	0.343	0.162	0.505
TCGA-A7-A4SD-01	Low	0.508193	0.0852	0.00961	0.00653	0.00515	0.0378	0.0952	0.00824	0	0.0467	0.0404	0.0223	0.0018	2.08e-19	0	0	0.165	0.229	0.0122	0.124	0.0266	0.151
TCGA-AO-A129-01	Low	0.494136	0.15	0	0.000601	0.00478	0.0726	0.126	0.0133	0.0364	0.0544	0.0455	0.0353	0.00923	8.19e-19	3.48e-18	2.09e-19	0.156	0.313	4.05e-18	0.206	0.051	0.257
TCGA-GM-A2DN-01	Low	0.485044	0.0668	0.019	0.00323	0.00426	0.0992	0.218	0.0376	0.0252	0.0435	0.0224	0.0198	0.00726	7.84e-19	3.13e-20	4.57e-18	0.0387	0.132	1.66e-18	0.171	0.0301	0.201
TCGA-A2-A0CR-01	Low	0.48123	0.347	0	0.113	0.0234	0.194	0.309	0.0574	0.131	0.0247	0.0363	0.0455	0.0178	5.4e-19	1.44e-18	2.21e-17	0.195	0.0556	1.12e-17	0.429	0.161	0.59
TCGA-A2-A04X-01	Low	0.47836	0.128	0.0118	0.0117	0.00617	0.0771	0.16	0.0279	0.0412	0.0727	0.0503	0.0474	0	0	0	0	0.118	0.256	0	0.217	0.0206	0.238
TCGA-E9-A3QA-01	Low	0.471038	0.27	0.0135	0.0128	6.58e-20	0.0604	0.166	0.0891	0.00312	0.08	0.0771	0.0404	0.0206	0	6.16e-18	8.39e-18	0.154	0.271	0.0864	0.35	0.0135	0.364
TCGA-3C-AALI-01	Low	0.468119	0.0754	1.24e-19	0.0297	3.65e-21	0.0348	0.1	0.01	0.0229	0.0157	0.0204	0.0295	0	3e-18	0	0	0.212	0.131	0	0.093	0.0131	0.106
TCGA-BH-A0GY-01	High	1.81057	0	3.53e-21	0	0.00809	9.11e-19	0.0033	0.0132	0.0178	0.0375	0.0221	0.0474	0.00866	0.00584	4.94e-18	6.76e-19	0.0445	0.121	1.03e-18	0.0579	0.0137	0.0715
TCGA-C8-A12X-01	Low	0.466644	1.15e-19	1.27e-18	5.61e-18	5.27e-19	0	4.46e-20	0.000907	0.0668	0.0324	0.0174	0.0591	4.09e-18	0.0091	0	1.35e-17	0.109	0.062	5.3e-19	0.0386	0.0435	0.0821
TCGA-E9-A1ND-01	Low	0.454556	0.0432	0.0211	0.0115	0.00989	0.066	0.156	0.0336	0.017	0.129	0.108	0.056	0.111	0.00262	0.0135	1.23e-18	0.197	0.275	0.0203	0.274	0.0126	0.286
TCGA-A8-A092-01	High	1.8211	1.32e-20	0	0	0.000895	1.04e-18	4.27e-19	0.00125	0.00137	0.0483	0.0276	0.0513	0	0	0	3.13e-18	0.125	0.196	0	0.0487	0.000685	0.0494
TCGA-BH-A1F2-01	High	1.85179	0	0.00222	0	0.0073	4.04e-18	0.00834	0	0.0273	0.0153	0	0.0471	0	0.00757	0	8.87e-18	0	0.285	0	0.0273	0.236	0.263
TCGA-A2-A0ST-01	Low	0.451379	0.573	0.0772	0.0988	0.0135	0.227	0.346	0.206	0.0608	0.0691	0.054	0.00791	0.0287	0	0	0	0.113	0.37	4.29e-18	0.745	0.0564	0.801
TCGA-D8-A1X5-01	High	1.87311	0.0439	0.0144	0	0.00161	0.00458	0.0421	0.00694	0.00545	0.0614	0.0257	0.0447	0.0435	0	0	0.000361	0.0816	0.0358	0.0277	0.132	0.0176	0.15
TCGA-MS-A51U-01	Low	0.434994	0	0	0	0.0049	0.0134	0.0455	0.00231	0.0521	0.00446	0	0.025	0	2.62e-19	3.27e-18	2.18e-17	0.0482	0	5.46e-18	0.017	0.149	0.166
TCGA-E2-A573-01	Low	0.414099	0.0921	0.0053	0.002	0.00237	0.0693	0.162	0.0274	0.0193	0.0555	0.0607	0.0256	0.019	0	3.68e-19	3.08e-19	0.159	0.496	6.21e-18	0.176	0.0328	0.208
TCGA-E9-A1NA-01	High	1.8792	0.0338	0.00381	0	0.00835	0.0032	0.0205	0.00457	3.74e-20	0.0785	0.051	0.0761	0.0293	0.000435	1.26e-18	2.02e-19	0.0664	0.0984	0.00223	0.109	0.0238	0.133
TCGA-AQ-A7U7-01	Low	0.408264	0.228	0.00681	0.0956	0.0231	0.242	0.291	0.0214	0.116	0.0482	0.0378	0.0432	0.0217	0	0	0.000189	0.0349	0.0677	0	0.388	0.125	0.514
TCGA-EW-A6SB-01	Low	0.397944	0.372	0.0419	0.0265	0.000687	0.131	0.214	0.0554	0	0.0547	0.0462	0.0186	0.0174	1.3e-20	0.0158	1.25e-19	0.243	0.502	0	0.444	0.0175	0.462
TCGA-D8-A27F-01	High	1.88017	7.15e-19	0	0	0	5.09e-18	0	0.00668	0.0161	0.0183	0.0249	0.00108	0.00917	0.0045	0	2.23e-18	0.0181	0.329	1.5e-17	0.0336	0.0355	0.0691
TCGA-PE-A5DE-01	Low	0.393212	0.168	0.00546	0.061	0.0114	0.234	0.349	0.0207	0.072	0.0449	0.0253	0.0494	0	6.48e-18	1.48e-18	2.89e-19	0.132	0.141	2.83e-18	0.312	0.0746	0.387
TCGA-B6-A0IJ-01	Low	0.388091	0.167	0.0212	0	0.0108	0.057	0.12	0.0436	0.00797	0.0729	0.0704	0.019	0.0457	9.76e-19	3.58e-18	4.25e-18	0.109	0.489	0	0.263	0.0177	0.281
TCGA-EW-A6SC-01	High	1.9252	0	0.01	0	0.00563	0	0.011	0.0131	0.0463	0.0167	0.00919	0.0257	0.0151	0.0012	0	0	0.0283	0.108	4.47e-19	0.0442	0.116	0.16
TCGA-A7-A3J1-01	Low	0.386157	0.104	7.57e-20	0.0239	0.00905	0.0489	0.121	0.0151	0.0707	0.0193	0.0138	0.0666	0	4.41e-19	6.92e-18	1.57e-19	0.0282	0.0289	0	0.135	0.169	0.303
TCGA-D8-A73U-01	Low	0.378834	0.201	0	0.0767	0.02	0.231	0.35	0.0246	0.0576	0.162	0.0982	0.098	0.0371	0	0	0.00342	0.0593	0.0475	0	0.455	0.0955	0.551
TCGA-B6-A0RT-01	Low	0.375526	0.451	0.142	0.222	0.0654	0.371	0.509	0.0401	0.0401	0.0621	0.0618	0.0405	0.0183	2.99e-18	1.28e-17	0.0486	0.111	0.379	5.18e-19	0.693	0.0658	0.759
TCGA-BH-A0RX-01	Low	0.342016	0.116	0.00196	0	0.00604	0.0886	0.193	0.0598	0.159	0.06	0.0595	0.0461	0.059	6.6e-19	1.67e-17	1.4e-17	0.186	0.341	0	0.256	0.115	0.371
TCGA-WT-AB41-01	Low	0.33724	0.307	2.06e-20	0.0726	0.0122	0.152	0.22	0.0778	0.0281	0.0376	0.0458	0.0501	0.0129	3.02e-20	2.85e-20	2.02e-17	0.196	0.0249	2.31e-17	0.395	0.0518	0.447
TCGA-OL-A66I-01	Low	0.334648	0.116	0.0399	0.0497	0.0215	0.255	0.351	0.0485	0.000375	0.0657	0.0486	0.0508	0.0131	6.31e-20	7.35e-18	0	0.192	0.505	0.0461	0.337	0.0312	0.368
TCGA-GM-A4E0-01	Low	0.33438	0	0	0	0.00749	0.0294	0.106	0.00868	0.352	0.039	0.0201	0.102	0.0227	0.00475	2.81e-18	0	0.0304	0.00306	0	0.0706	0.465	0.535
TCGA-BH-A1FM-01	High	1.96334	0	0.0207	1.13e-17	0.00525	0	0.0198	0.000164	0.013	0.0243	0	0.0439	0.00654	0.00516	1.09e-19	2.26e-17	4.24e-19	0.402	0	0.0377	0.0477	0.0853
TCGA-AR-A2LK-01	High	2.12677	0.0178	0.00314	1.59e-18	0.00961	9.88e-19	1.61e-19	0.000644	0.00559	0.0455	0.0055	0.0634	0	3.24e-19	6.69e-18	0	0.0786	0.125	1.99e-18	0.0599	0.00982	0.0697
TCGA-GM-A2DA-01	Low	0.326309	0.0286	0.00156	0.0273	0.0198	0.118	0.2	0.0111	0.113	0.0193	0.00683	0.0514	4.33e-18	0	0	0	0.0918	0.0754	0	0.128	0.153	0.28
TCGA-AR-A0U0-01	Low	0.325145	0.0662	0.0309	0	0.00386	0.0764	0.142	0.0261	0.0132	0.069	0.08	0.0344	0.0137	0	0.00864	4.61e-18	0.274	0.431	0	0.178	0.0116	0.189
TCGA-BH-A6R9-01	High	2.16552	0.0384	2.81e-19	0.0258	0.00342	0.0398	0.0532	0.0413	0.0675	0.0847	0.0512	0.0673	0.0703	7.56e-19	1.31e-18	0	0.0631	0.0907	0.0229	0.2	0.173	0.373
TCGA-E9-A2JT-01	Low	0.309549	1.21	0.149	0.271	0.0324	0.351	0.42	0.0248	0.106	0.00682	0.00219	0.0293	0	0	0	0.0282	0.0383	0.112	2.65e-18	1.11	0.227	1.34
TCGA-E2-A1B6-01	Low	0.30112	0.732	0.0652	0.188	0.0196	0.314	0.377	0.041	0.0169	0.0323	0.0413	0.0208	0.00631	0	0	0	0.242	0.283	9.44e-18	0.756	0.018	0.774
TCGA-A2-A3XW-01	Low	0.276013	0	0	0	0.00868	1.91e-18	0	0.0588	0.0618	0.011	0.0199	0.0206	0	0	0	0	0.131	0	0	0.0554	0.0971	0.153
TCGA-A2-A04Q-01	Low	0.270903	0.283	0.032	0.0437	0.017	0.185	0.272	0.0985	0.0308	0.0649	0.0601	0.0204	0.00632	3.25e-18	0	0	0.181	0.446	2.29e-18	0.428	0.0614	0.489
TCGA-AQ-A0Y5-01	High	2.20407	3.97e-20	0	0	0.00162	0	1.33e-19	0.0028	0.0725	0.0282	0.00835	0.0324	0.0251	0.00366	4.12e-18	0	0.00796	0.0427	0.00805	0.0502	0.0711	0.121
TCGA-BH-A0E6-01	Low	0.260718	0.0784	0	8.97e-18	0	0	0.0138	0.0011	0.0663	0.0195	0.0164	0.0569	3.83e-18	0	9.49e-19	1.65e-18	0.193	0.216	1.08e-17	0.066	0.107	0.173
TCGA-BH-A1FE-06	High	2.21292	0	4.02e-18	4.17e-18	9.33e-05	6.1e-18	0	6.18e-19	0.204	0.0486	0.0395	0.0415	0.00919	0	0	0	0.0358	0.0652	9.87e-19	0.0386	0.288	0.327
TCGA-AR-A0TU-01	Low	0.212949	0.0145	0.0215	3.33e-18	0.0213	0.0142	0.0702	0.0613	0.00702	0.048	0.0355	0.0449	0.0101	0	0	1.15e-18	0.136	0.749	0	0.111	0.00604	0.117
TCGA-GM-A2DO-01	Low	0.203164	0.889	0.0757	0.183	0.0326	0.314	0.454	0.057	3.38e-21	0.0392	0.0371	0.0163	0	3.66e-18	0	0.00657	0.166	0.164	0	0.888	3.14e-20	0.888
TCGA-E2-A1LH-01	Low	0.194943	0.209	0	0.028	0.0083	0.168	0.226	0.044	0.0467	0.0829	0.077	0.0703	0.0223	0	0	9.12e-19	0.18	0.233	0	0.353	0.0965	0.45
TCGA-EW-A1IZ-01	Low	0.164722	0.305	0.0374	0.064	0.017	0.246	0.379	0.0239	0.0711	0.0505	0.0404	0.0366	0.0153	0	0.011	0.0151	0.175	0.208	0	0.442	0.0362	0.478
TCGA-AO-A0J6-01	Low	0.10125	0.0505	7.03e-21	0	4.77e-19	0.0373	0.0987	0.00165	4.55e-19	0.036	0.0316	0.0269	6.36e-20	0	0	0	0.235	0.347	0	0.0856	4.89e-19	0.0856
TCGA-B6-A0I2-01	Low	-0.05428	0.15	0.0101	0.0171	0.00791	0.144	0.225	0.015	0	0.0481	0.0494	0.0259	0.007	0	0.0178	3.33e-19	0.254	0.36	1.61e-18	0.256	0.00561	0.261
TCGA-OL-A97C-01	High	2.50528	5.17e-19	7.82e-19	0.000625	0.00897	0.0711	0.0872	0.00611	0.0577	0.00448	0.00669	0.0175	0.0154	0	0	6.67e-18	0.0792	0.0349	0.0134	0.0696	0.108	0.177

## Sheet: Checkpoints
ID	Risk group	Risk score	VISTA	PD-1	PD-L1	PD-L2	CTLA4	HAVCR2	LAG3	TIGIT
TCGA-3C-AAAU-01	High	1.17403	4.47287	3.17307	2.84363	3.1794	2.90357	3.93483	4.53342	2.52601
TCGA-3C-AALI-01	Low	0.468119	2.98295	0.718694	1.69316	1.26954	0.441167	3.35472	1.03013	0.521804
TCGA-3C-AALJ-01	Low	0.640744	4.45715	2.77554	1.61298	2.65432	2.73927	4.41053	2.22415	2.78129
TCGA-3C-AALK-01	Low	0.962816	4.45931	1.68252	1.93171	2.29816	2.5282	3.91772	1.93804	2.38881
TCGA-4H-AAAK-01	Low	0.999545	4.41315	1.49788	1.95619	2.72163	2.42826	4.27872	1.75724	2.02327
TCGA-5L-AAT0-01	Low	1.04311	4.78688	2.84347	2.01418	3.37806	2.39746	4.66803	2.49777	2.62572
TCGA-5L-AAT1-01	High	1.16089	5.26713	3.87405	3.36123	3.55358	3.71434	5.27961	4.26373	3.66598
TCGA-5T-A9QA-01	Low	0.893245	3.16538	0.380887	1.14923	0.891606	0.434564	3.81445	2.16462	0.0737273
TCGA-A1-A0SB-01	High	1.11859	3.72419	0.369773	0.698525	1.05789	0.272725	2.31212	1.56716	0.0613691
TCGA-A1-A0SD-01	High	1.18812	4.63936	1.40562	2.55695	3.43006	1.45698	4.15815	2.12198	1.96675
TCGA-A1-A0SE-01	Low	0.949774	4.32538	1.0248	1.75677	2.65285	0.717952	3.2119	1.12793	1.33055
TCGA-A1-A0SF-01	Low	0.689922	5.14545	3.26213	2.00645	3.36882	2.28151	3.5932	2.39532	3.01191
TCGA-A1-A0SG-01	Low	0.989504	4.38281	1.4889	1.81387	2.39917	1.33287	3.99306	1.18545	1.43124
TCGA-A1-A0SH-01	High	1.30214	4.03818	0.901033	1.52012	2.69067	0.769579	4.46265	0.793578	0.994468
TCGA-A1-A0SI-01	Low	0.692746	4.45195	2.8899	2.9761	3.92541	2.4451	4.62675	3.74547	3.32568
TCGA-A1-A0SJ-01	Low	1.03818	4.57333	1.7303	1.35683	2.19061	1.21764	3.6083	1.13921	1.28886
TCGA-A1-A0SK-01	High	1.73659	2.15335	1.23464	0.841038	1.49283	0.126978	2.3845	1.96889	0.523703
TCGA-A1-A0SM-01	High	1.18751	4.6318	0.906457	1.88217	2.68348	0.685026	4.42219	0.682479	0.480737
TCGA-A1-A0SN-01	Low	0.844502	4.18663	2.05474	2.43227	3.38099	2.37411	4.57028	2.24151	3.18757
TCGA-A1-A0SO-01	Low	0.886756	2.89166	0.72484	0.972231	2.07346	1.45708	3.10726	1.49907	1.25085
TCGA-A1-A0SP-01	High	1.31409	4.42189	1.75654	2.07501	3.53342	2.60883	4.33997	2.75693	2.31721
TCGA-A1-A0SQ-01	Low	0.991057	4.13624	1.16778	1.21272	1.76952	0.522833	3.65211	1.2621	0.642756
TCGA-A2-A04N-01	High	1.22818	4.05804	0.967846	1.99616	2.63816	1.11981	4.16002	1.2314	1.28802
TCGA-A2-A04P-01	Low	1.07796	4.46477	2.29052	2.34694	2.99761	2.88248	3.96314	2.93635	3.03647
TCGA-A2-A04Q-01	Low	0.270903	5.54263	4.22909	4.34663	4.50644	4.16476	5.50433	5.2524	4.70617
TCGA-A2-A04R-01	High	1.14405	2.64217	0.229369	1.59544	1.39657	0.599797	3.44906	0.893962	0.208517
TCGA-A2-A04T-01	Low	0.841696	4.12766	3.27078	3.03297	4.43388	3.92225	4.66985	4.77259	3.59444
TCGA-A2-A04U-01	High	1.14529	3.20279	0.602809	0.815304	1.61752	2.86513	2.75332	1.31636	0.673948
TCGA-A2-A04V-01	High	1.12014	3.8458	0.62745	1.67375	1.57457	0.457869	4.28875	2.44679	0.960121
TCGA-A2-A04W-01	Low	1.0562	4.18611	1.04306	1.29186	1.38093	1.01215	3.5372	1.12773	0.951889
TCGA-A2-A04X-01	Low	0.47836	4.26971	3.22628	3.12298	3.31505	3.38808	4.61715	4.56996	3.48274
TCGA-A2-A04Y-01	Low	0.787424	4.479	1.91065	1.9946	2.72661	2.68426	4.8159	3.5521	3.18964
TCGA-A2-A0CK-01	Low	0.612157	5.04949	1.97458	1.70173	2.13405	1.20554	3.99828	2.82876	1.64599
TCGA-A2-A0CL-01	Low	1.03817	6.25122	4.4696	4.17087	4.85245	5.20611	5.6947	5.47801	5.38032
TCGA-A2-A0CM-01	Low	0.886901	4.66888	3.21592	4.72303	3.97384	4.18215	5.54501	4.7223	3.83222
TCGA-A2-A0CO-01	High	1.25514	6.40765	3.85357	2.98979	3.53128	3.69689	4.28062	3.62886	3.82601
TCGA-A2-A0CP-01	Low	0.770566	4.67374	1.22046	1.85941	2.77611	0.927503	3.39119	1.50607	0.94362
TCGA-A2-A0CQ-01	Low	0.6365	4.68283	1.10112	1.70447	1.08485	0.600844	4.83762	1.57556	0.422971
TCGA-A2-A0CR-01	Low	0.48123	6.52367	4.20488	2.02307	3.03836	3.66579	4.23356	4.87936	4.26073
TCGA-A2-A0CS-01	High	1.08605	4.26168	0.538604	1.76233	2.2029	1.28446	4.22119	1.34305	1.65163
TCGA-A2-A0CT-01	High	1.28169	3.46384	1.72422	1.80763	2.16428	0.545475	4.22981	0.786148	0.593471
TCGA-A2-A0CU-01	High	1.26148	4.209	0.872367	2.2716	1.66127	1.03167	3.53822	1.10382	1.52617
TCGA-A2-A0CV-01	Low	0.579884	5.03215	2.1302	2.30374	2.60358	1.35419	4.55878	1.95145	1.99426
TCGA-A2-A0CW-01	Low	0.968174	3.37804	1.98153	2.65641	2.85951	2.30966	4.37246	3.38109	2.02186
TCGA-A2-A0CX-01	Low	0.727229	4.19852	2.01616	2.7666	3.48633	2.68196	4.79535	2.72272	2.36942
TCGA-A2-A0CY-01	Low	0.892147	3.47187	0.484468	0.37708	0.663315	0.0512696	1.84022	1.95831	0.121863
TCGA-A2-A0CZ-01	Low	0.789992	5.29761	2.3694	1.98835	2.99115	2.15397	4.562	2.1451	2.53058
TCGA-A2-A0D0-01	Low	0.745806	4.39746	2.98397	1.97805	2.43317	2.22714	3.88781	4.58428	2.56246
TCGA-A2-A0D1-01	High	1.45069	3.0556	0.726204	1.30195	1.14018	1.82088	2.94384	2.26519	1.08546
TCGA-A2-A0D2-01	Low	1.03817	4.77728	2.76174	1.89008	3.02753	3.29209	4.51117	3.54426	2.85742
TCGA-A2-A0D3-01	Low	0.730724	4.00313	2.53275	2.4482	2.24052	1.6962	3.39982	1.76031	1.96931
TCGA-A2-A0D4-01	High	1.34163	3.83202	0.327132	1.42034	1.25567	1.01091	2.66275	1.1472	0.223838
TCGA-A2-A0EM-01	Low	0.990734	4.28149	0.508073	2.34805	1.99542	0.674779	4.18929	0.998374	0.687491
TCGA-A2-A0EN-01	Low	0.846538	5.21799	2.98226	3.24004	3.78212	3.75824	5.6725	3.29387	3.70115
TCGA-A2-A0EO-01	High	1.16315	4.95288	1.10571	1.92752	2.90932	1.24252	4.71686	1.43379	1.72324
TCGA-A2-A0EP-01	High	1.4808	6.64075	4.29388	3.77428	4.3931	5.70779	5.6421	4.8722	4.56729
TCGA-A2-A0EQ-01	Low	0.705896	4.99939	3.63116	3.5334	3.5173	3.64133	4.89615	5.03051	4.32078
TCGA-A2-A0ER-01	High	1.40949	3.34972	0.785722	1.17692	1.9952	1.11514	4.07693	1.02865	1.14274
TCGA-A2-A0ES-01	Low	1.03297	5.81383	1.81663	2.28558	3.14986	2.34569	4.3099	1.48315	1.68728
TCGA-A2-A0ET-01	Low	0.975612	4.1056	1.29678	2.03691	1.45677	1.80678	4.1983	2.94702	1.64319
TCGA-A2-A0EU-01	High	1.18442	3.65475	0.258051	2.72334	2.18159	1.19474	4.00188	1.16767	1.34272
TCGA-A2-A0EV-01	High	1.08562	4.45652	1.45806	2.55388	3.16215	2.33775	4.80258	2.31554	2.31632
TCGA-A2-A0EW-01	Low	0.944205	5.60175	1.83051	2.74175	4.15133	1.76798	4.45231	1.74048	2.17371
TCGA-A2-A0EX-01	High	1.13228	4.3904	0.840508	1.34203	2.38086	0.44189	3.50918	0.783237	1.61854
TCGA-A2-A0EY-01	High	1.15843	3.95061	1.94877	1.94371	2.82151	1.6895	4.25926	2.3096	2.16355
TCGA-A2-A0ST-01	Low	0.451379	6.05829	4.44891	4.43996	5.04	4.69462	5.26638	5.26049	4.98443
TCGA-A2-A0SU-01	High	1.1902	4.8594	1.0952	1.34063	2.8758	1.60026	3.68336	1.20237	2.1858
TCGA-A2-A0SV-01	High	1.4687	4.14413	1.33712	2.30818	3.57741	3.61008	5.67232	3.20365	2.5323
TCGA-A2-A0SW-01	Low	0.65069	4.81782	3.25045	2.42042	3.08925	2.1158	4.47783	3.35229	3.05662
TCGA-A2-A0SX-01	Low	1.03969	5.03852	3.59942	3.42683	3.70013	4.27462	4.9817	3.85897	4.32836
TCGA-A2-A0SY-01	Low	1.02874	4.99396	2.06095	2.24947	3.45982	1.198	4.52198	1.746	2.56681
TCGA-A2-A0T0-01	High	1.11586	4.71326	1.84616	2.0137	3.04716	2.15098	4.10024	2.56861	2.02103
TCGA-A2-A0T1-01	Low	0.943241	5.19827	3.47097	3.2312	3.89413	3.53092	5.18683	3.66859	3.40461
TCGA-A2-A0T2-01	Low	0.928601	4.9501	1.5154	1.49087	2.68472	2.27484	3.97453	3.1573	1.93883
TCGA-A2-A0T3-01	High	1.39023	3.34527	1.05237	1.60556	1.75931	0.603334	3.29656	1.46255	1.08283
TCGA-A2-A0T4-01	Low	1.07916	5.2585	2.10878	2.2756	3.29365	2.12033	4.9881	2.48128	2.88329
TCGA-A2-A0T5-01	High	1.15717	4.46247	0.671978	1.7105	2.20904	0.865233	3.50909	0.564412	0.792516
TCGA-A2-A0T6-01	High	1.16627	5.10807	2.38505	2.9169	3.57443	2.24809	5.32604	1.61761	3.12344
TCGA-A2-A0T7-01	High	1.14824	4.48825	1.58032	2.28777	3.08998	1.81474	4.36663	1.8437	1.52431
TCGA-A2-A0YC-01	High	1.27454	4.18508	1.36648	2.38916	2.44984	1.24709	4.74356	2.64635	1.77415
TCGA-A2-A0YD-01	Low	0.744011	5.146	2.07774	3.65777	3.38183	1.31765	4.96595	2.02194	2.30823
TCGA-A2-A0YE-01	High	1.43303	3.42443	1.79085	1.52767	2.14031	1.63965	3.07332	1.74902	1.52531
TCGA-A2-A0YF-01	High	1.3094	4.84515	0.409996	2.10375	1.89438	0.678863	5.46245	1.38434	0.942691
TCGA-A2-A0YG-01	High	1.38416	3.27854	0.883246	1.55924	2.60238	1.79036	3.89283	1.17752	1.51811
TCGA-A2-A0YH-01	High	1.31498	5.34159	2.73925	3.51705	4.6437	3.98555	5.90947	5.47894	3.19708
TCGA-A2-A0YI-01	Low	0.83834	5.41475	2.10739	2.44552	3.76182	1.77699	5.73722	2.35198	2.97325
TCGA-A2-A0YJ-01	Low	0.916849	2.81931	0.43384	1.91388	2.52946	0.513563	3.24996	0.596776	0.545952
TCGA-A2-A0YK-01	Low	0.885163	6.09963	3.90674	3.31663	4.18532	4.06784	4.54892	3.58665	4.40264
TCGA-A2-A0YL-01	Low	0.876471	4.96008	2.02592	3.08417	3.25763	1.49156	3.89888	2.24037	2.08576
TCGA-A2-A0YM-01	High	1.19763	4.74922	1.89218	2.83847	3.87367	2.76268	4.74238	3.69398	2.42007
TCGA-A2-A0YT-01	High	1.55696	4.15573	0.72924	1.75879	2.82977	0.956859	3.80249	3.40529	1.06476
TCGA-A2-A1FV-01	High	1.19334	4.22047	1.34076	1.26336	2.0853	0.209104	3.2375	0.996699	0.270573
TCGA-A2-A1FW-01	High	1.16448	3.89232	1.12951	1.68257	3.07129	1.52758	3.7612	2.83413	1.26659
TCGA-A2-A1FX-01	Low	1.02942	4.72885	1.51021	1.60521	2.4518	1.5348	4.84405	2.3126	1.69842
TCGA-A2-A1FZ-01	High	1.32353	4.71124	1.47427	1.79814	3.24069	1.05751	5.16514	1.38973	1.22642
TCGA-A2-A1G0-01	Low	1.05425	4.94492	2.13764	2.23087	3.42083	2.13448	4.24563	1.86211	2.23737
TCGA-A2-A1G1-01	Low	0.953931	4.19221	1.66648	3.94109	4.27635	3.74233	5.30697	3.57248	3.17252
TCGA-A2-A1G4-01	High	1.33519	3.88853	1.24941	1.84045	1.77232	0.988993	4.08526	1.19814	1.5599
TCGA-A2-A1G6-01	High	1.23349	5.7867	1.18584	2.6082	3.40391	0.833797	3.8524	1.91033	1.49333
TCGA-A2-A259-01	High	1.44735	4.69819	1.79545	3.67931	3.8582	2.81504	4.31349	1.8074	2.54744
TCGA-A2-A25A-01	Low	0.828715	5.87372	1.76715	2.84724	3.41929	2.16939	4.44042	2.05689	2.49696
TCGA-A2-A25B-01	High	1.4314	3.65364	1.28705	2.73788	3.90516	2.64243	5.1853	1.9535	2.14711
TCGA-A2-A25C-01	Low	0.885427	3.69397	1.33122	2.63261	3.04413	1.70832	4.32442	1.60124	1.97893
TCGA-A2-A25D-01	High	1.12321	4.98474	3.17297	3.14486	3.61422	3.4486	5.13438	4.52187	4.05801
TCGA-A2-A25E-01	High	1.12169	3.35576	1.26811	1.62085	2.08177	2.24324	4.08531	1.7899	2.00786
TCGA-A2-A25F-01	Low	0.765108	6.10904	3.63433	5.10796	6.05566	4.96889	6.43425	4.63406	5.45188
TCGA-A2-A3KC-01	High	1.25494	5.22129	2.33126	1.94609	2.96173	1.59001	4.73719	2.09176	1.70011
TCGA-A2-A3KD-01	High	1.25483	4.50973	0.802837	1.55084	2.10531	1.1259	3.37126	1.29261	0.873917
TCGA-A2-A3XS-01	Low	1.06714	4.41662	2.61032	1.43577	2.31665	2.55465	3.96175	2.16221	2.18114
TCGA-A2-A3XT-01	Low	0.816895	4.72721	1.85569	2.41248	3.3833	2.59518	5.61531	2.39769	1.76688
TCGA-A2-A3XU-01	High	1.30912	2.71239	0.53593	0.165876	0.397772	0.277981	2.01421	1.49472	0.199023
TCGA-A2-A3XV-01	High	1.26962	2.87048	0.996151	0.353052	0.973206	0.869119	2.80733	0.627346	0.332181
TCGA-A2-A3XW-01	Low	0.276013	5.82617	2.80591	1.28207	2.10264	1.74318	3.80376	2.66972	1.71285
TCGA-A2-A3XX-01	Low	1.05798	4.68812	2.58164	1.46817	2.40896	3.10105	3.94912	3.01223	2.26066
TCGA-A2-A3XY-01	High	1.10078	5.19767	3.04921	3.09978	3.42042	4.07201	4.53998	4.12013	3.46565
TCGA-A2-A3XZ-01	Low	0.780912	5.22586	4.07285	2.6215	2.85309	3.80144	4.2364	3.08838	3.77981
TCGA-A2-A3Y0-01	Low	0.682087	4.53898	4.00891	3.31544	2.56393	3.54867	4.11765	4.81463	3.20929
TCGA-A2-A4RW-01	High	1.54306	5.01284	2.50631	1.72862	2.92743	1.73734	3.75802	3.158	2.49554
TCGA-A2-A4RX-01	Low	0.900797	4.58908	2.48251	2.43724	3.42602	2.4163	3.61979	2.24835	2.97577
TCGA-A2-A4RY-01	Low	0.728113	5.74191	2.14586	2.29538	3.01797	1.87707	3.71886	2.32714	2.17473
TCGA-A2-A4S0-01	Low	0.966399	4.1438	0.267593	1.46293	0.968191	0.543246	3.13992	1.40952	0.339417
TCGA-A2-A4S1-01	High	1.33969	6.28325	1.22319	1.0322	3.48108	1.14739	5.05377	3.12217	1.10296
TCGA-A2-A4S2-01	High	1.08872	5.31289	2.61247	4.20279	3.68607	2.86358	4.83974	5.08044	2.56892
TCGA-A2-A4S3-01	Low	0.918816	3.93859	3.64841	2.2874	2.76657	3.38055	4.31107	3.28944	3.16597
TCGA-A7-A0CD-01	Low	0.768028	3.42586	0.295217	1.81242	1.88337	0.566725	3.32971	2.07054	0.669995
TCGA-A7-A0CE-01	High	1.31136	4.27275	1.04881	2.16124	2.17673	1.87959	3.49841	2.08854	1.43637
TCGA-A7-A0CG-01	Low	0.918589	5.27286	1.83221	2.5644	3.45015	2.12011	4.5404	1.83246	2.72442
TCGA-A7-A0CH-01	High	1.15162	3.84738	0.38755	2.02093	2.17067	0.804298	3.89215	1.31745	0.86797
TCGA-A7-A0CJ-01	High	1.11197	3.60695	1.17131	2.69318	2.67645	2.02318	4.1267	3.40691	1.04733
TCGA-A7-A0D9-01	High	1.36533	3.38031	0.725565	1.28058	1.75414	0.826918	3.17926	0.421232	0.784931
TCGA-A7-A0DA-01	High	1.08031	3.61793	0.21983	2.16663	3.44453	0.784232	3.96167	1.54243	0.733499
TCGA-A7-A0DB-01	High	1.503	3.75631	0.310442	1.9874	2.70227	0.608259	4.91104	0.528956	0.603884
TCGA-A7-A0DC-01	High	1.28357	1.38571	0.148606	0.620491	0.886433	0.314324	1.56724	0.230894	0.181612
TCGA-A7-A13D-01	High	1.26346	3.23303	0.297786	1.10546	2.49946	0.477055	2.8959	0.688585	0.521784
TCGA-A7-A13E-01	Low	0.953689	2.71917	0.546577	2.45123	3.64015	2.3975	3.59842	1.89079	2.33043
TCGA-A7-A13F-01	Low	0.832033	4.18083	0.289356	1.16231	1.81337	0.529004	4.68862	0.801215	0.401823
TCGA-A7-A13G-01	Low	0.925783	3.35671	0.591045	1.99873	3.59558	0.752943	4.18784	1.49894	1.50215
TCGA-A7-A13H-01	Low	0.701279	5.63909	3.30495	3.41764	4.1445	2.6756	5.06542	3.03521	2.58799
TCGA-A7-A26E-01	High	1.52007	3.22115	0.355871	1.46183	2.63695	0.695064	4.12922	0.545592	0.711221
TCGA-A7-A26F-01	Low	0.791141	3.62195	1.36194	3.60038	4.44355	3.44124	4.51007	2.03114	2.07145
TCGA-A7-A26G-01	Low	0.998086	5.33038	1.76967	2.72737	3.91601	3.29893	5.06851	1.87593	3.38901
TCGA-A7-A26H-01	High	1.21547	3.88514	2.6664	2.15662	3.12802	2.3852	4.7337	2.42958	2.43143
TCGA-A7-A26I-01	High	1.38731	3.81741	0.801464	3.0156	4.64132	3.2807	5.06416	1.27683	1.98371
TCGA-A7-A26J-01	High	1.34595	2.88209	1.01188	2.39056	3.13542	2.07758	4.28891	1.4341	1.34474
TCGA-A7-A2KD-01	Low	1.02859	4.56717	2.81483	2.52337	3.29645	3.15683	4.92676	3.05842	2.99195
TCGA-A7-A3IY-01	High	1.51176	5.71144	1.56499	2.13939	2.80092	1.40994	5.39237	1.99905	1.25111
TCGA-A7-A3IZ-01	High	1.27119	3.12105	0.440573	1.61279	1.67931	0.401105	4.05485	1.86532	0.456134
TCGA-A7-A3J0-01	Low	0.729802	4.47053	2.88551	2.10442	2.17208	2.00785	3.7045	3.37975	2.451
TCGA-A7-A3J1-01	Low	0.386157	5.90315	3.1861	3.25478	3.81931	3.09935	4.87481	3.54935	3.16208
TCGA-A7-A3RF-01	High	1.10641	3.96178	0.118644	1.09229	0.997126	0.155699	2.56999	1.60204	0.12333
TCGA-A7-A425-01	Low	1.04864	5.97736	1.78849	1.3195	2.08178	1.06693	4.28706	1.30715	0.589196
TCGA-A7-A426-01	Low	0.717446	5.61283	2.61465	2.25834	2.74484	1.61807	3.17038	2.78342	1.27675
TCGA-A7-A4SA-01	Low	0.813663	5.15561	3.64059	3.10138	2.85918	3.86178	4.73907	3.68969	3.69019
TCGA-A7-A4SB-01	Low	0.876813	4.34488	2.22423	1.66541	1.84674	0.948019	4.34218	2.23757	0.598047
TCGA-A7-A4SC-01	Low	0.866565	5.25109	2.52268	2.23511	2.68222	2.16302	3.59969	1.34642	1.67946
TCGA-A7-A4SD-01	Low	0.508193	5.25532	3.82319	3.6657	3.55883	3.77344	4.70311	5.16108	3.06462
TCGA-A7-A4SE-01	High	1.40242	4.73264	1.53662	2.25383	2.89678	2.4193	3.93197	2.73277	1.55615
TCGA-A7-A4SF-01	High	1.25264	3.184	2.88154	2.06692	2.58055	1.93938	3.79971	3.29455	1.83426
TCGA-A7-A56D-01	Low	1.04912	4.03143	0.936662	1.76734	2.47757	2.03769	4.0545	3.84054	0.612359
TCGA-A7-A5ZV-01	High	1.20664	6.3674	1.00457	1.40989	2.18687	0.809512	4.33702	2.2507	0.734319
TCGA-A7-A5ZW-01	Low	1.06547	5.11907	1.48856	2.89608	2.06796	1.98608	3.96021	1.38421	1.83875
TCGA-A7-A5ZX-01	High	1.26469	5.00146	0.582316	2.30356	2.93224	1.50121	3.73418	1.04151	0.245929
TCGA-A7-A6VV-01	High	1.36237	4.6669	1.99853	2.09417	3.23518	2.4588	4.8558	2.75742	2.4896
TCGA-A7-A6VW-01	High	1.41515	5.79037	1.08353	1.84783	2.14858	0.445685	4.37635	3.57565	0.336241
TCGA-A7-A6VX-01	High	1.41285	3.61602	1.44575	2.73089	2.36282	1.65049	4.19789	2.18629	1.41257
TCGA-A7-A6VY-01	Low	0.649502	5.49499	3.24654	3.10052	4.19109	4.00827	4.74968	4.40437	2.75138
TCGA-A8-A06O-01	High	1.29479	3.8693	1.16712	2.43534	2.70329	2.19373	4.51078	1.89186	2.38052
TCGA-A8-A06P-01	High	1.23041	4.72332	1.01898	1.69644	2.75012	1.2417	4.97934	0.992627	1.21902
TCGA-A8-A06Q-01	High	1.35928	2.23426	0.603108	1.39326	1.62647	0.460875	3.52533	0.651824	0.748083
TCGA-A8-A06R-01	High	1.74487	4.49384	1.39827	2.55645	3.23285	3.01586	4.47507	2.20182	2.37028
TCGA-A8-A06T-01	High	1.1807	3.78978	2.03996	2.75015	3.04641	2.25128	3.53758	2.71877	2.53754
TCGA-A8-A06U-01	High	1.43024	3.8554	1.69342	2.51823	3.15247	2.69197	4.37057	3.15011	2.62419
TCGA-A8-A06X-01	High	1.34819	3.74491	2.37441	3.05873	3.29059	2.827	4.51725	4.28128	2.6712
TCGA-A8-A06Y-01	High	1.29157	2.78821	0.168508	0.784574	1.02406	0	2.48289	1.09946	0.0607397
TCGA-A8-A06Z-01	High	1.47527	3.3349	0.311075	1.19824	0.940381	0.384483	3.45852	1.20251	0.287092
TCGA-A8-A075-01	High	1.23501	4.20433	2.63921	2.8639	3.44981	2.08794	4.98463	2.87624	2.10613
TCGA-A8-A076-01	High	1.60021	3.32169	0.991546	2.58116	2.96624	2.01472	5.38382	1.24327	1.90462
TCGA-A8-A079-01	High	1.10081	3.53011	0.866212	1.21147	1.64515	1.21333	4.44887	1.8407	1.05031
TCGA-A8-A07B-01	High	1.80296	3.23802	1.50899	1.83712	2.33819	2.22705	4.39858	2.68425	2.14314
TCGA-A8-A07C-01	High	1.27343	3.68564	2.24248	2.96325	4.06383	3.67917	4.86825	3.094	3.1624
TCGA-A8-A07E-01	High	1.11706	5.62096	1.96641	1.76564	3.65319	1.30113	4.17444	1.981	2.3721
TCGA-A8-A07F-01	High	1.40749	3.86352	1.14171	2.49374	3.26709	2.15536	4.92256	1.58018	2.21399
TCGA-A8-A07G-01	High	1.53753	4.05964	1.21589	1.66397	3.05566	1.0522	4.38662	1.47902	1.74831
TCGA-A8-A07I-01	High	1.62385	4.04885	1.77864	3.26719	3.63106	2.95808	5.27121	3.42909	2.43115
TCGA-A8-A07J-01	High	1.10944	5.54571	0.993713	1.95101	3.36808	1.55086	6.50122	1.91671	1.70527
TCGA-A8-A07L-01	High	1.45459	3.29172	0.552669	1.27669	1.86073	0.838127	3.79606	1.09936	0.856033
TCGA-A8-A07O-01	High	1.34386	4.19748	1.3509	1.81383	3.13749	1.10647	4.0993	2.5224	1.3866
TCGA-A8-A07P-01	High	1.19785	3.79924	0.570477	1.85004	2.6824	0.786984	5.0462	1.09244	1.08796
TCGA-A8-A07R-01	High	1.14793	4.45497	2.38896	1.94476	2.90824	0.970286	3.32003	3.07205	0.624242
TCGA-A8-A07S-01	High	1.20873	3.7473	0.840617	1.64917	1.96934	0.838813	4.35382	1.70336	0.662884
TCGA-A8-A07U-01	Low	0.825308	5.42423	3.21922	4.88783	4.78599	4.15871	5.33548	5.80738	4.22674
TCGA-A8-A07W-01	High	1.49831	4.1621	1.4089	1.91399	2.96361	2.22719	4.94362	2.31143	2.01375
TCGA-A8-A07Z-01	Low	0.874536	4.73194	1.5194	2.35978	1.64812	0.899781	4.02212	3.43161	1.474
TCGA-A8-A082-01	High	1.54641	4.81362	0.109732	1.50083	1.70509	0.47925	4.95196	1.12125	0.253379
TCGA-A8-A084-01	High	1.38596	3.05333	0.413679	2.82681	2.49836	1.28388	3.97101	2.89871	0.343609
TCGA-A8-A085-01	High	1.15043	2.78208	0.151706	0.587015	1.26749	0.0315558	3.15577	0.53095	0.0220391
TCGA-A8-A086-01	High	1.32886	3.76919	0.63022	2.08722	3.0609	1.06523	4.464	1.77116	0.848419
TCGA-A8-A08A-01	Low	0.995595	4.4641	1.45455	1.30207	2.15426	1.02961	4.68928	1.34058	1.34982
TCGA-A8-A08B-01	High	1.5195	2.93467	2.07868	3.17008	2.98492	2.94784	3.69435	3.92834	2.2112
TCGA-A8-A08C-01	Low	0.906211	2.73672	0.713691	1.67871	1.59326	0.852899	3.79676	1.17521	0.969848
TCGA-A8-A08F-01	High	1.2507	4.46982	2.54533	3.4868	4.41285	2.99826	5.64531	3.55084	2.51696
TCGA-A8-A08G-01	High	1.47887	4.08667	1.83336	2.28445	2.88781	2.68222	4.64135	2.87993	2.27775
TCGA-A8-A08I-01	Low	0.524957	5.17235	3.83455	5.08597	5.53191	3.55985	5.4833	5.02564	3.9258
TCGA-A8-A08J-01	High	1.40573	3.93589	1.3197	2.47901	2.97578	1.54709	4.68032	2.60296	1.51469
TCGA-A8-A08L-01	High	1.35737	4.5746	2.86128	2.68749	3.46181	3.13439	4.44702	3.88111	2.92563
TCGA-A8-A08O-01	High	1.41451	3.61227	0.551519	2.7396	2.45814	0.876375	3.48815	0.826224	0.616637
TCGA-A8-A08P-01	High	1.41475	4.71374	2.91142	3.89661	4.71849	3.96504	5.82059	4.1204	3.63732
TCGA-A8-A08R-01	High	1.13688	4.58458	2.84149	3.66227	4.2661	3.47	5.15634	4.20887	3.13431
TCGA-A8-A08S-01	High	1.50604	3.48451	0.893513	2.39549	2.49898	1.08454	3.89772	3.02144	1.21671
TCGA-A8-A08T-01	High	1.21275	3.82653	1.11683	1.81801	2.17696	0.999211	4.1623	1.68592	1.54784
TCGA-A8-A08X-01	Low	0.958611	4.83342	1.98072	2.09679	3.00439	2.27001	4.12347	1.94469	2.11878
TCGA-A8-A08Z-01	High	1.66647	4.55022	1.19249	3.47267	3.46752	1.1457	6.13296	1.43635	1.76534
TCGA-A8-A091-01	High	1.19897	3.92578	1.31667	1.24381	2.00746	0.695506	4.15649	1.77553	1.14796
TCGA-A8-A092-01	High	1.8211	2.95792	1.17292	1.85254	2.94564	1.68895	4.7197	2.34188	1.31629
TCGA-A8-A093-01	High	1.163	3.26869	0.248435	2.28337	2.04806	0.247789	3.70151	0.917076	0.176886
TCGA-A8-A095-01	High	1.17795	3.8512	1.64751	1.5417	2.27679	1.30266	4.34867	1.26252	1.73799
TCGA-A8-A097-01	High	1.26136	3.99021	1.16369	2.18175	2.9745	2.1463	4.88845	1.83751	2.05857
TCGA-A8-A099-01	Low	0.947029	4.20695	0.860317	2.10782	2.57053	1.39301	3.80812	1.36002	1.8138
TCGA-A8-A09A-01	High	1.34926	4.19233	2.30628	2.35307	3.01721	2.20503	4.48463	1.78269	2.58372
TCGA-A8-A09B-01	Low	1.02376	4.06848	1.03954	2.30526	1.48324	0.457852	3.73334	1.6415	0.812576
TCGA-A8-A09D-01	High	1.3984	4.95335	1.28266	1.92977	3.22381	1.82729	5.66371	2.12942	2.2722
TCGA-A8-A09E-01	High	1.31185	3.31763	0.750372	1.6692	1.79551	0.685883	3.54789	1.13241	0.720742
TCGA-A8-A09I-01	Low	0.987986	3.69249	2.57376	3.43567	3.73724	3.07043	5.28884	4.38123	2.6735
TCGA-A8-A09K-01	Low	0.577831	3.75595	2.67584	2.7722	3.17069	2.63356	3.9569	3.34484	3.32408
TCGA-A8-A09M-01	Low	1.01756	4.33895	3.39971	2.85551	3.03629	2.90321	4.75517	3.85227	3.23304
TCGA-A8-A09N-01	High	1.33852	3.98216	1.71523	1.83089	2.47575	1.58936	3.74592	2.30263	1.9714
TCGA-A8-A09Q-01	Low	1.05944	4.27919	2.77995	2.68122	3.81418	3.07608	5.1631	2.43966	3.20049
TCGA-A8-A09R-01	Low	0.837455	4.12801	2.93911	3.42918	4.02053	2.70441	5.19086	3.41008	2.48781
TCGA-A8-A09T-01	High	1.19096	4.07733	0.720234	2.01445	1.06014	0.787699	5.0116	2.02827	1.17887
TCGA-A8-A09V-01	High	1.17234	3.55849	0.126242	1.97576	2.36221	0.44864	3.8188	1.28325	0.326431
TCGA-A8-A09W-01	Low	1.00606	3.85465	0.396578	1.38281	2.87337	0.870385	4.69125	1.10367	1.53314
TCGA-A8-A09X-01	Low	0.925121	4.52228	2.64601	2.96973	3.94185	2.87949	5.31932	3.48667	3.7195
TCGA-A8-A0A1-01	Low	1.00185	5.14161	1.6884	4.202	5.35677	3.89025	5.607	2.94491	3.30612
TCGA-A8-A0A2-01	High	1.11277	4.30466	1.92105	2.03488	3.133	1.95987	4.43084	2.0505	2.05762
TCGA-A8-A0A4-01	High	1.22301	5.34839	0.543654	2.3353	2.85014	0.542372	3.26321	2.57296	1.04863
TCGA-A8-A0A6-01	Low	0.641017	4.70703	2.55364	3.14568	3.91588	2.97452	4.95931	3.00096	3.39112
TCGA-A8-A0A7-01	Low	0.864493	5.51573	3.83311	3.38264	4.68821	3.25604	5.30158	4.83993	4.302
TCGA-A8-A0A9-01	High	1.26297	3.58357	1.02276	3.12819	2.83768	1.15636	4.88474	2.3849	1.62713
TCGA-A8-A0AB-01	High	1.33093	2.53427	0.187435	0.570934	1.39888	0.734702	3.30255	1.05303	0.170173
TCGA-A8-A0AD-01	High	1.25906	4.6872	0.688885	1.77807	2.2001	1.03297	5.67582	1.04156	1.29666
TCGA-AC-A23C-01	High	1.25683	4.08134	1.49205	2.48705	3.39163	2.57805	4.52104	2.83455	2.67747
TCGA-AC-A23E-01	High	1.31637	4.27612	0.284151	1.84984	3.30424	0.406663	5.15564	1.10316	0.294741
TCGA-AC-A23G-01	Low	0.898626	5.78135	1.89877	2.24967	2.88953	1.05369	4.23618	1.43944	1.89966
TCGA-AC-A23H-01	High	1.35253	2.88515	0.382752	2.54415	2.43812	1.01369	4.08306	0.819067	0.781543
TCGA-AC-A2B8-01	Low	0.836174	4.86769	1.82215	2.45426	3.03529	2.26495	5.27335	1.93411	2.11444
TCGA-AC-A2BK-01	High	1.094	2.41795	1.20983	1.69902	2.58217	0.726563	2.58902	1.61658	0.977054
TCGA-AC-A2BM-01	High	1.14844	3.84615	2.25689	2.40339	2.63231	3.64287	4.52698	2.38665	2.98298
TCGA-AC-A2FB-01	Low	1.04786	5.87888	3.24366	3.58568	4.25434	3.9709	4.95237	4.10161	4.64835
TCGA-AC-A2FE-01	Low	0.980101	5.45763	3.11757	2.81834	3.05334	3.00478	4.97052	3.47081	3.28457
TCGA-AC-A2FF-01	Low	0.833278	5.62935	2.40893	2.47359	4.26263	2.55286	4.45875	1.92011	3.1645
TCGA-AC-A2FG-01	Low	0.917623	4.97458	0.800555	1.98377	2.91959	0.415808	3.52587	1.1321	0.898162
TCGA-AC-A2FK-01	Low	0.966093	5.73387	1.116	2.65869	2.9073	1.20068	3.76305	1.80112	1.83649
TCGA-AC-A2FM-01	High	1.33412	4.17847	0.985678	0.74208	1.31589	0.935312	2.52544	1.3686	0.648025
TCGA-AC-A2FO-01	Low	1.07631	5.61374	2.90419	2.68856	3.599	2.42518	4.3171	2.17012	3.38024
TCGA-AC-A2QH-01	High	1.47909	1.77176	0.141121	1.84447	3.90323	2.29098	2.95209	3.04452	0.321533
TCGA-AC-A2QI-01	Low	0.91811	5.52998	2.34841	1.81	3.36625	1.56374	4.54065	2.24598	2.30919
TCGA-AC-A2QJ-01	High	1.48446	5.8977	1.66526	0.522184	1.80146	1.29426	4.55935	3.30799	0.527282
TCGA-AC-A3BB-01	Low	0.646805	5.67763	3.52477	2.25829	3.05532	2.5802	4.5698	2.64046	3.19647
TCGA-AC-A3EH-01	High	1.20409	4.1085	1.78729	1.34493	2.16098	0.530565	3.97793	1.71836	0.888224
TCGA-AC-A3HN-01	Low	0.964815	5.5142	2.59694	2.59163	3.45094	2.1674	4.94151	2.44396	2.52288
TCGA-AC-A3OD-01	Low	0.746982	4.17122	1.08518	3.58792	4.64746	3.91578	4.97068	3.56835	3.69501
TCGA-AC-A3QP-01	Low	0.968609	5.25681	1.84767	0.970523	1.86854	0.816105	4.97971	1.51431	1.1156
TCGA-AC-A3QQ-01	Low	0.791447	3.07447	0.131301	3.1288	3.42078	0.963559	4.08671	3.0786	2.02695
TCGA-AC-A3TM-01	Low	0.863522	4.51084	2.26177	1.45488	1.14397	1.38614	3.56976	2.48021	1.05833
TCGA-AC-A3TN-01	Low	0.774805	4.07564	1.32935	1.71802	1.51407	0.748768	3.14252	0.943682	0.497565
TCGA-AC-A3W5-01	Low	0.809457	5.09299	3.18701	2.64278	3.33358	3.24593	5.38774	3.1137	3.16955
TCGA-AC-A3W6-01	Low	0.793702	5.98123	3.00264	2.29124	3.35152	2.60417	4.62388	3.46759	2.6623
TCGA-AC-A3W7-01	Low	0.65203	5.05502	1.59221	1.87442	1.93754	1.00339	3.53688	2.26409	1.2979
TCGA-AC-A3YI-01	High	1.68352	4.99838	1.95555	4.09315	2.70976	1.13249	4.67038	2.15763	1.28064
TCGA-AC-A3YJ-01	Low	0.784662	5.17163	1.04512	1.10796	1.06454	1.12324	4.87626	1.83242	1.08476
TCGA-AC-A4ZE-01	Low	0.850366	4.70848	2.75397	1.61981	1.7966	1.03427	3.27555	2.06173	1.45355
TCGA-AC-A5EH-01	Low	0.951777	4.31268	1.80613	1.99265	3.28782	1.87594	4.70925	2.74582	1.94998
TCGA-AC-A5XS-01	Low	0.803671	5.65793	2.43238	2.18111	2.86844	2.71043	4.93217	3.25526	2.62867
TCGA-AC-A5XU-01	High	1.40836	4.38426	1.48766	1.40205	2.18137	1.2109	3.55818	2.69436	1.15599
TCGA-AC-A62V-01	High	1.58416	3.65848	0.335054	0.326668	1.29514	0.63258	3.7069	1.01776	0.252835
TCGA-AC-A62X-01	High	1.10722	4.63931	0.62747	4.62702	5.05067	0.938729	1.97574	2.30274	1.13337
TCGA-AC-A62Y-01	High	1.52629	4.7007	1.36997	1.94965	2.13932	1.65613	5.51787	3.23567	1.09428
TCGA-AC-A6IV-01	High	1.09908	5.81995	3.12332	2.59972	3.46686	3.43406	5.5857	2.81459	2.86357
TCGA-AC-A6IW-01	Low	1.07767	6.48191	3.95	3.25635	3.24255	4.34608	5.61626	7.13962	3.48
TCGA-AC-A6IX-01	High	1.17501	5.45826	1.66979	2.31484	2.82257	2.28906	4.11917	2.45367	2.32106
TCGA-AC-A6IX-06	Low	0.946469	5.56605	2.96025	2.36287	3.06888	2.88482	3.99204	2.84169	3.47136
TCGA-AC-A6NO-01	Low	0.716736	3.81191	0.682451	2.31849	1.51528	0.871319	2.94126	1.73442	1.05373
TCGA-AC-A7VB-01	Low	1.01532	2.76319	1.15456	2.11611	1.10314	0.368619	2.1345	1.52514	0.204124
TCGA-AC-A7VC-01	High	1.25756	4.65794	0.738398	0.773439	1.2743	0.321826	3.51382	2.82128	0.383431
TCGA-AC-A8OP-01	Low	1.06154	4.41653	1.4138	1.72681	2.35122	2.11081	3.55963	1.98753	1.79418
TCGA-AC-A8OQ-01	Low	0.760365	5.18606	3.39086	2.33101	2.9645	3.6709	4.22821	3.91362	3.01749
TCGA-AC-A8OR-01	Low	0.986712	5.06331	0.484278	1.3299	1.54422	0.136768	4.06273	2.04918	0.119722
TCGA-AC-A8OS-01	Low	0.66562	5.39495	2.29086	2.4318	2.93374	2.37834	4.30824	2.37987	2.24391
TCGA-AN-A03X-01	Low	1.06177	4.13269	1.17681	0.906476	2.08198	0.577194	4.49618	0.933614	1.08574
TCGA-AN-A03Y-01	High	1.1074	3.51698	1.83159	1.31828	2.36649	2.03993	4.21223	2.86875	2.41199
TCGA-AN-A041-01	High	1.14112	3.70449	0.457888	1.62405	2.32384	0.99513	3.99041	0.641404	0.915236
TCGA-AN-A046-01	Low	0.631541	4.12175	2.47801	3.21357	3.33544	2.98566	4.78318	4.37063	3.73604
TCGA-AN-A049-01	High	1.37697	4.42594	1.46459	1.82873	2.63686	1.96772	4.92422	1.80327	2.09159
TCGA-AN-A04A-01	High	1.31195	4.06756	0.842482	1.48485	2.85261	1.0388	3.69848	1.37016	0.777088
TCGA-AN-A04C-01	Low	0.869959	3.67906	1.56221	1.16753	1.74459	1.68132	3.52256	1.68513	1.98383
TCGA-AN-A04D-01	High	1.37319	2.64692	0.606726	1.18547	1.05811	0.440094	2.62849	1.62936	3.25218
TCGA-AN-A0AJ-01	High	1.45639	3.9249	3.09436	3.24719	4.03707	3.24561	4.86027	4.19837	3.45944
TCGA-AN-A0AK-01	High	1.53828	3.14004	2.2923	1.88044	2.60847	1.93487	4.05693	2.86825	1.79239
TCGA-AN-A0AL-01	High	1.30219	4.89136	2.6352	1.87404	3.04233	2.63177	4.22705	3.18526	2.66625
TCGA-AN-A0AM-01	Low	1.02915	4.23041	2.95195	2.72159	3.07349	2.81115	4.25774	3.9746	2.67181
TCGA-AN-A0AR-01	Low	0.746726	3.0747	0.860876	0.672452	1.25313	0.88119	3.35879	1.97807	1.08628
TCGA-AN-A0AS-01	High	1.54464	4.6585	0.960001	1.49039	2.142	1.41091	5.3393	4.34368	1.11636
TCGA-AN-A0AT-01	Low	0.856841	3.63017	2.67813	2.21009	2.9293	2.19051	3.75461	2.58035	2.62002
TCGA-AN-A0FD-01	Low	0.803659	3.81816	2.5099	2.16069	2.98108	1.15469	3.77349	3.28767	1.99094
TCGA-AN-A0FF-01	Low	0.722361	4.2828	1.98317	1.62862	2.26917	1.70144	4.8161	2.54981	2.12192
TCGA-AN-A0FJ-01	Low	0.910391	3.78914	1.30785	1.43355	2.94506	2.58575	2.8348	1.82036	1.71109
TCGA-AN-A0FK-01	High	1.19047	3.44681	0.639692	1.03765	1.45718	0.282599	3.27541	1.72943	0.650977
TCGA-AN-A0FL-01	High	1.43999	4.256	0.269707	1.00356	1.40801	0.460269	2.52604	0.794681	0.440126
TCGA-AN-A0FN-01	Low	0.706141	5.62632	3.25102	2.8566	3.70928	2.98565	5.23186	2.15525	4.03069
TCGA-AN-A0FS-01	High	1.25801	5.029	0.197255	2.73712	2.40004	0.548584	3.35635	1.09205	0.374766
TCGA-AN-A0FT-01	Low	1.03741	3.99254	1.11523	1.23775	1.47677	0.514473	4.158	3.05373	0.962031
TCGA-AN-A0FV-01	High	1.26256	3.35776	0.55962	1.15011	2.22998	0.684865	4.15364	1.56893	0.634266
TCGA-AN-A0FW-01	High	1.33329	4.22986	1.12761	0.723658	1.92312	1.12539	3.33835	1.59072	1.92399
TCGA-AN-A0FX-01	Low	0.997904	4.52374	1.50243	1.43358	2.70791	1.09678	3.34372	1.55256	1.19746
TCGA-AN-A0FY-01	High	1.34251	3.76951	0.833962	1.90673	2.57749	1.96575	4.03707	2.57211	1.61375
TCGA-AN-A0FZ-01	High	1.33909	3.34335	0.277448	0.570448	1.51264	0.160238	3.26537	0.752348	0.248629
TCGA-AN-A0G0-01	High	1.32429	3.41377	2.08741	1.66635	2.56418	1.34444	3.87141	2.03909	1.38774
TCGA-AN-A0XL-01	High	1.22752	5.11927	1.13064	2.12332	2.52801	0.939859	3.9857	1.46045	0.930265
TCGA-AN-A0XN-01	High	1.30354	5.16341	1.12939	2.83972	3.89952	1.6087	5.91774	1.97772	1.52938
TCGA-AN-A0XO-01	High	1.48983	3.84876	0.177646	1.77719	1.54643	0.210139	2.64899	0.724779	0.207429
TCGA-AN-A0XP-01	High	1.103	3.75227	0.513511	3.27183	2.79146	0.791453	4.02595	2.7764	0.593333
TCGA-AN-A0XR-01	Low	0.845317	3.37578	0.949514	3.49198	2.12623	0.683112	3.58258	2.87926	0.814603
TCGA-AN-A0XS-01	Low	0.897712	5.09733	3.05808	2.18162	3.12876	2.08562	4.41595	2.37465	3.02407
TCGA-AN-A0XT-01	High	1.27495	4.2863	1.08733	2.2313	1.82872	0.719915	2.93272	2.35047	0.832497
TCGA-AN-A0XU-01	Low	0.917268	3.95286	3.23736	2.99294	3.23382	2.34424	4.21892	3.83093	2.79708
TCGA-AN-A0XV-01	High	1.13967	4.8414	2.3583	2.44771	3.0771	2.71258	3.29589	2.29959	2.63101
TCGA-AN-A0XW-01	Low	0.907767	4.68419	3.68365	3.89356	4.67817	3.89168	5.19627	4.56298	3.77448
TCGA-AO-A03L-01	High	1.08917	4.16826	1.96765	2.21503	2.47176	1.65035	4.06343	2.6209	2.09981
TCGA-AO-A03M-01	High	1.3533	4.6048	3.19289	3.48244	3.81804	3.42875	4.63913	4.34779	3.6664
TCGA-AO-A03N-01	High	1.36768	3.53735	1.16826	1.06437	0.919919	0.903584	3.12397	3.86554	1.27158
TCGA-AO-A03O-01	High	1.77984	3.87598	2.80338	3.27669	3.46131	3.05446	4.42652	4.01089	3.08976
TCGA-AO-A03P-01	High	1.19126	3.31172	0.735328	1.61003	2.43487	1.01576	3.41507	1.60891	1.33281
TCGA-AO-A03R-01	Low	0.681507	4.8243	2.49071	2.28507	2.65313	2.81906	3.6781	2.90695	3.2997
TCGA-AO-A03T-01	Low	0.575323	4.42516	1.27853	1.63565	2.00241	1.88671	3.00908	2.50563	2.06525
TCGA-AO-A03U-01	High	1.10081	6.74097	1.11126	2.417	2.42978	1.00094	5.88502	1.48852	1.64605
TCGA-AO-A03V-01	High	1.14626	4.0595	1.23996	1.06365	1.63068	0.871786	3.22766	1.9749	1.32009
TCGA-AO-A0J2-01	Low	0.572558	3.50712	2.47298	4.3359	2.75825	2.9227	3.98569	3.54659	2.7437
TCGA-AO-A0J3-01	Low	0.784492	3.09384	0.718891	1.48676	1.49616	0.40277	2.80566	2.10994	0.681274
TCGA-AO-A0J4-01	Low	0.783608	5.37698	2.72143	3.16282	3.63563	3.24336	4.26451	3.41949	3.08658
TCGA-AO-A0J5-01	High	1.27142	4.5841	0.865138	1.32199	2.88669	0.708594	4.55568	1.38582	0.451962
TCGA-AO-A0J6-01	Low	0.10125	5.03365	3.11815	3.33433	2.82052	2.48916	4.43203	5.20359	3.72095
TCGA-AO-A0J7-01	High	1.26412	2.80531	0.744231	0.933466	1.43048	0.714676	3.11206	2.7474	0.487134
TCGA-AO-A0J8-01	Low	0.888679	4.1161	1.86371	2.55464	2.22848	2.21489	5.03901	2.25764	2.18579
TCGA-AO-A0J9-01	Low	0.614941	5.44078	1.94416	1.82032	2.89814	3.01539	5.21771	3.79245	2.8239
TCGA-AO-A0JA-01	High	1.22354	4.41347	2.19016	1.86196	3.32184	2.28213	4.98052	1.66808	2.10102
TCGA-AO-A0JB-01	Low	0.685448	4.42746	1.66326	0.876944	1.3737	0.693746	3.17695	2.14628	0.717866
TCGA-AO-A0JC-01	Low	0.541443	6.50417	6.20373	4.12792	4.46578	6.34769	4.67008	5.16138	6.9039
TCGA-AO-A0JD-01	High	1.51812	3.4603	1.73118	2.54765	2.43992	2.34324	4.28771	2.59793	2.52283
TCGA-AO-A0JE-01	High	1.09481	4.60442	2.80063	3.50567	4.11323	3.53298	5.14288	3.98779	3.49576
TCGA-AO-A0JF-01	High	1.18121	5.13107	1.76776	2.11768	3.05364	0.720012	5.1306	1.54988	2.17358
TCGA-AO-A0JG-01	Low	0.72689	5.04159	3.22748	2.67579	3.44308	2.06495	3.84068	3.3921	3.84568
TCGA-AO-A0JI-01	Low	1.00493	3.99152	1.2366	2.95622	2.25579	0.728549	3.28773	0.97462	1.31009
TCGA-AO-A0JJ-01	Low	0.614142	5.54654	2.78498	2.47623	3.7087	1.6866	4.82505	2.28071	3.31031
TCGA-AO-A0JL-01	Low	0.856463	4.33047	1.70925	0.793211	2.11832	1.01491	2.6481	1.90311	1.7433
TCGA-AO-A0JM-01	High	1.49998	3.21368	1.37314	2.03371	3.13326	2.5004	4.8555	2.03355	2.10249
TCGA-AO-A124-01	High	1.17779	4.59212	2.15202	1.81597	3.894	1.71801	2.7102	2.79293	1.89476
TCGA-AO-A125-01	Low	0.698077	3.58634	1.00391	1.19755	0.878772	0	2.32855	0.800644	0.0656099
TCGA-AO-A126-01	Low	0.785432	5.08401	1.86353	1.32298	2.5432	2.05582	3.7204	2.58594	2.26415
TCGA-AO-A128-01	Low	0.77344	6.72295	5.89406	6.40629	6.29158	5.26236	6.11697	7.78784	5.02058
TCGA-AO-A129-01	Low	0.494136	4.30802	3.48989	2.87309	3.61537	2.66807	4.07916	3.96476	3.11668
TCGA-AO-A12A-01	Low	0.768251	4.73653	1.91053	3.47678	2.62686	1.45023	4.06623	1.69546	2.32771
TCGA-AO-A12B-01	Low	1.03112	3.54096	0.831968	1.61232	1.15076	0.216689	2.82895	2.02076	0.655672
TCGA-AO-A12C-01	High	1.26755	3.4843	0.381174	1.2398	2.76082	0.421413	3.92804	1.0142	0.336153
TCGA-AO-A12D-01	Low	0.885586	4.9461	3.31949	3.03729	3.88454	3.62274	4.50798	3.2173	3.96436
TCGA-AO-A12E-01	High	1.31243	5.24216	1.3586	2.36459	2.29445	1.34087	5.27192	1.64477	0.247588
TCGA-AO-A12F-01	High	1.30772	3.97262	0.546785	1.37891	3.09043	0.96182	3.25991	0.37724	0.855743
TCGA-AO-A12G-01	High	1.32475	4.41133	1.03021	1.70781	2.31244	0.90437	3.57438	1.2177	1.65407
TCGA-AO-A12H-01	Low	0.980815	4.287	0.268259	1.04729	1.53851	0	3.92405	2.08792	0.302218
TCGA-AO-A1KO-01	High	1.24719	4.88731	0.650782	1.61516	2.34873	1.44616	2.66731	0.748332	0.260431
TCGA-AO-A1KP-01	High	1.20011	2.09745	0.789912	2.17206	1.25592	1.33172	2.45719	2.36282	0.558763
TCGA-AO-A1KQ-01	Low	0.921547	3.89007	2.13905	2.32414	2.61053	2.56487	4.09173	4.66011	2.93904
TCGA-AO-A1KR-01	Low	0.557843	3.52278	3.34464	1.13413	1.15699	2.79014	2.68889	3.66218	2.12359
TCGA-AO-A1KS-01	High	1.66874	3.37616	0.684331	2.33927	3.36225	2.74763	4.62673	2.74735	2.49727
TCGA-AO-A1KT-01	High	1.58809	4.18064	0.672781	2.57567	2.53702	1.52862	5.04495	2.04913	1.43611
TCGA-AQ-A04H-01	Low	1.06422	3.87486	1.09497	1.2573	2.29201	1.44075	3.27327	0.919983	1.38947
TCGA-AQ-A04J-01	Low	0.979456	5.76361	2.80553	2.30365	3.60742	3.51523	4.49541	2.82581	4.86321
TCGA-AQ-A04L-01	Low	1.05497	3.59758	0.281561	1.74873	2.02935	1.58279	3.99116	1.59609	1.2693
TCGA-AQ-A0Y5-01	High	2.20407	3.97219	0.367731	1.84383	3.30044	1.29131	4.19513	1.19802	0.599322
TCGA-AQ-A1H2-01	Low	0.979742	4.32998	1.22471	1.49902	2.11262	1.19208	4.42138	3.79687	1.17452
TCGA-AQ-A1H3-01	Low	0.849338	4.80936	2.04137	2.16741	3.00525	1.97574	4.26126	1.31667	2.45365
TCGA-AQ-A54N-01	Low	0.858043	2.97846	2.13826	0.797958	1.55987	1.18412	3.08814	3.71136	1.18466
TCGA-AQ-A54O-01	Low	0.589802	3.34785	2.09423	0.690622	1.81883	2.80585	4.29925	2.52822	1.92268
TCGA-AQ-A7U7-01	Low	0.408264	5.87775	4.80185	3.96504	4.45008	4.75919	4.94124	4.93275	4.51184
TCGA-AR-A0TP-01	High	1.64301	3.92892	0.0479712	0.942714	2.30125	0.45508	2.63335	0.62099	0.0499142
TCGA-AR-A0TQ-01	High	1.28686	4.44302	2.74239	2.38141	3.15447	3.11303	4.03987	2.93105	3.30846
TCGA-AR-A0TR-01	Low	0.855304	3.85743	1.14699	1.33219	1.43614	1.4025	3.01845	1.49585	1.47322
TCGA-AR-A0TS-01	High	1.37244	5.86583	2.96422	2.58204	3.96899	3.49483	4.61412	3.32712	4.33177
TCGA-AR-A0TT-01	Low	0.925698	5.33382	4.04874	3.67993	4.92268	4.14205	5.42069	4.61178	4.43399
TCGA-AR-A0TU-01	Low	0.212949	3.66022	2.90567	3.14333	3.18686	3.0553	4.6313	4.13218	3.02849
TCGA-AR-A0TV-01	Low	0.844521	4.38013	3.71663	3.14532	3.6928	3.02755	4.84141	3.55829	3.28968
TCGA-AR-A0TW-01	High	1.18265	4.3289	3.01529	2.27247	3.78947	3.19265	4.81311	3.74399	2.77735
TCGA-AR-A0TX-01	High	1.31691	4.93728	3.61878	3.80865	4.1678	3.64474	5.00243	4.29424	4.14008
TCGA-AR-A0TY-01	High	1.26559	3.3608	0.752089	1.10054	1.39559	0.568801	3.13409	1.45181	0.833245
TCGA-AR-A0TZ-01	High	1.57685	3.45339	0.823328	1.5553	2.21802	0.945651	3.86308	1.03297	1.15964
TCGA-AR-A0U0-01	Low	0.325145	4.99793	3.56374	4.77105	4.86257	3.37285	4.97294	6.07025	3.70013
TCGA-AR-A0U2-01	Low	0.923909	4.35638	2.62859	2.14307	3.55579	3.26365	4.3363	2.89919	3.04377
TCGA-AR-A0U3-01	Low	0.975958	3.37082	1.44677	2.28642	2.42526	2.18806	3.73438	1.99453	2.2123
TCGA-AR-A0U4-01	High	1.22315	5.55591	2.59131	3.24671	4.59859	2.92977	5.86213	2.91011	2.57514
TCGA-AR-A1AH-01	High	1.11105	3.3636	0.369983	1.20402	0.903839	0.66268	2.74506	0.800326	0.875181
TCGA-AR-A1AI-01	Low	0.530983	4.94603	3.55043	3.34464	4.27168	3.47535	5.07508	4.32983	4.03648
TCGA-AR-A1AJ-01	Low	1.06926	6.12052	4.11294	4.67097	5.5222	5.08997	5.93444	5.71476	4.95655
TCGA-AR-A1AK-01	Low	0.94433	5.85923	3.28923	3.28483	4.26372	2.50399	5.38708	3.98741	3.11254
TCGA-AR-A1AL-01	Low	1.0182	5.32435	1.47717	2.94521	2.87712	1.45596	3.85436	1.3533	2.19888
TCGA-AR-A1AM-01	Low	0.899674	5.43527	2.15804	2.12253	2.61562	2.28082	4.09545	2.0924	2.42221
TCGA-AR-A1AN-01	High	1.29358	4.44898	1.01117	0.87413	2.19356	1.03162	4.58802	1.08381	1.0939
TCGA-AR-A1AO-01	High	1.42245	5.63155	3.23138	3.71932	4.3537	3.63296	6.70576	3.63518	3.87864
TCGA-AR-A1AP-01	Low	0.920792	4.43263	2.88869	2.14567	3.10809	2.34056	4.71389	1.79687	1.94265
TCGA-AR-A1AQ-01	Low	0.611229	4.82614	3.5281	3.3288	3.89124	3.53644	4.62169	4.2099	3.80974
TCGA-AR-A1AR-01	High	1.32493	5.01528	1.76543	3.2132	3.99946	2.97157	5.9027	3.29983	3.37318
TCGA-AR-A1AS-01	High	1.33109	2.94399	0	1.0526	2.24245	0.414746	4.24655	1.49546	0.248993
TCGA-AR-A1AT-01	Low	0.829881	4.87985	3.24234	2.99349	3.8597	2.97348	4.80377	3.23879	3.14937
TCGA-AR-A1AU-01	High	1.34945	4.61885	1.30434	1.81097	2.7924	1.49723	3.58693	1.37129	1.22876
TCGA-AR-A1AV-01	High	1.59944	3.53836	0.321666	1.04293	2.15724	0.391033	4.31308	1.1437	0.38229
TCGA-AR-A1AW-01	Low	0.739	5.58327	4.66947	4.55085	5.22461	5.01426	5.30747	5.41199	5.16078
TCGA-AR-A1AX-01	Low	0.52258	5.5446	4.36811	3.38093	3.95567	3.97641	4.08709	3.88175	4.74751
TCGA-AR-A1AY-01	High	1.18668	3.04088	0.652498	2.10303	3.11568	0.464855	3.71828	2.2303	0.673967
TCGA-AR-A24H-01	High	1.29903	3.69575	2.03212	2.57599	2.81029	3.05409	4.75752	3.63564	3.06354
TCGA-AR-A24K-01	High	1.4356	2.42617	0.187637	1.47867	1.30161	0.472811	3.06683	0.565999	0.776914
TCGA-AR-A24L-01	High	1.13389	3.58164	0.455767	2.56132	2.58045	0.732518	4.6341	1.10868	0.863695
TCGA-AR-A24M-01	High	1.36582	4.33881	0.38623	1.68918	2.502	0.920525	4.68573	0.563438	0.299642
TCGA-AR-A24N-01	High	1.25356	3.70128	0.92091	1.8444	2.28437	1.69619	3.84838	1.17289	1.48742
TCGA-AR-A24O-01	High	1.08278	5.2605	1.50104	2.401	3.37034	1.99525	4.77477	1.83936	2.59088
TCGA-AR-A24P-01	High	1.13913	4.36674	0.794829	2.33742	2.74453	1.70354	4.41975	1.08295	1.70702
TCGA-AR-A24Q-01	Low	0.929954	4.34143	2.01812	2.41153	3.53077	2.24607	4.16498	2.5753	3.03618
TCGA-AR-A24R-01	High	1.11858	3.58863	1.49893	2.72447	3.05439	3.15246	4.50158	2.83113	3.16326
TCGA-AR-A24S-01	High	1.73399	4.57786	1.61713	3.17514	4.2089	3.00495	6.52359	2.91208	3.05618
TCGA-AR-A24T-01	High	1.51459	4.89933	0.752457	1.87485	3.25381	0.441076	5.24991	1.56663	0.938512
TCGA-AR-A24U-01	Low	0.988201	5.08251	2.38572	3.421	4.40951	3.84538	5.55135	3.40357	4.04906
TCGA-AR-A24V-01	High	1.55081	4.63009	1.54379	3.46817	3.79639	1.48254	5.35191	3.10591	1.66714
TCGA-AR-A24W-01	High	1.14881	4.83786	0.44559	2.31223	3.21423	0.589942	3.15435	1.72378	1.18971
TCGA-AR-A24X-01	Low	0.901102	3.64911	1.49498	2.40735	2.71665	1.59489	3.63296	1.53855	2.18671
TCGA-AR-A24Z-01	High	1.1419	2.75027	0.969614	2.0883	2.96947	1.24193	4.41198	3.087	1.44698
TCGA-AR-A250-01	High	1.26765	4.12468	1.63531	2.93155	4.0797	3.34431	5.38261	2.78343	3.09991
TCGA-AR-A251-01	High	1.63883	4.32087	0.913843	3.10552	3.51349	2.37358	4.68124	2.0507	2.24459
TCGA-AR-A252-01	Low	0.94508	5.29886	3.28935	4.02799	4.51211	3.82838	5.12265	3.8641	5.08298
TCGA-AR-A254-01	High	1.33058	4.52957	1.89897	3.37983	4.80455	3.25195	5.5339	3.16782	2.67402
TCGA-AR-A255-01	High	1.25251	4.18628	1.67653	2.98982	3.99044	3.25436	5.27955	2.83656	3.12281
TCGA-AR-A256-01	High	1.31506	5.24675	0.818201	2.28753	2.67332	2.19253	4.74191	2.34524	2.22269
TCGA-AR-A2LE-01	Low	0.716262	3.59347	0.703486	2.66603	2.20011	0.625834	3.14127	1.18598	1.34557
TCGA-AR-A2LH-01	High	1.14582	6.23922	2.87509	2.79795	3.13722	2.6992	4.38391	3.30651	3.40296
TCGA-AR-A2LJ-01	Low	1.06508	5.66217	2.56472	1.55725	2.53184	1.63815	5.43968	2.26168	1.83739
TCGA-AR-A2LK-01	High	2.12677	3.57284	1.34628	1.60788	2.93471	1.19666	4.82421	1.63821	1.69504
TCGA-AR-A2LL-01	High	1.20096	3.97237	0.922618	1.81434	2.61139	1.51335	5.26745	1.28073	1.35955
TCGA-AR-A2LM-01	Low	0.894597	4.60998	1.82987	2.26256	2.82011	0.981919	4.40561	1.55681	1.84145
TCGA-AR-A2LN-01	High	1.15372	5.54989	2.01188	2.77244	3.67762	1.5928	4.30582	1.89682	2.14897
TCGA-AR-A2LO-01	Low	0.950953	5.42274	3.32406	2.78235	3.25903	3.51761	4.38499	2.97313	3.70711
TCGA-AR-A2LQ-01	High	1.34881	5.53636	1.37159	1.96007	3.26111	1.34623	4.403	1.1261	0.794649
TCGA-AR-A2LR-01	High	1.61161	4.62833	1.11022	1.41667	3.00037	0.836527	4.0629	1.75392	0.986462
TCGA-AR-A5QM-01	High	1.35679	5.41177	1.87334	2.14957	2.23033	2.01479	5.10722	2.97024	1.54401
TCGA-AR-A5QN-01	High	1.15081	4.7031	2.20094	1.95362	2.85834	1.50429	4.07479	2.03774	1.69939
TCGA-AR-A5QP-01	High	1.28931	5.06087	1.43066	1.93435	2.3309	1.22103	3.55173	1.79527	1.27946
TCGA-AR-A5QQ-01	Low	0.754869	5.25999	3.70461	5.30452	5.12174	4.67748	4.83917	3.99737	3.40984
TCGA-B6-A0I1-01	High	1.137	5.029	0.198435	0.661521	0.943079	0.575429	1.97686	1.62013	1.041
TCGA-B6-A0I2-01	Low	-0.05428	4.80309	4.41136	3.18047	3.87716	3.40941	4.6476	5.67608	3.466
TCGA-B6-A0I5-01	Low	0.764571	3.7982	1.37115	0.936415	1.19111	0.538119	3.75631	1.36069	1.1244
TCGA-B6-A0I6-01	High	1.31911	3.81025	0.80764	1.3474	1.71734	2.43331	4.0295	2.46436	1.04055
TCGA-B6-A0I8-01	High	1.46459	3.84726	1.0835	0.51798	1.53089	0.168643	3.59799	1.37373	0.175655
TCGA-B6-A0I9-01	High	1.39521	3.55206	1.56768	2.27801	2.38095	1.63355	3.89588	1.58411	1.24702
TCGA-B6-A0IA-01	Low	0.776854	1.36272	0.298994	1.71858	0.792352	0	2.7354	0.39901	0.0379329
TCGA-B6-A0IB-01	Low	1.01419	3.31489	0.418616	0.807935	0.679723	0.447491	2.15233	2.29298	0.454166
TCGA-B6-A0IC-01	Low	1.00703	3.25726	0.152907	0.973606	0.584681	0.115857	3.27782	0.826546	0.0947885
TCGA-B6-A0IE-01	High	1.28389	4.09441	0.629064	0.918896	1.5528	1.04776	2.40681	1.39101	0.671562
TCGA-B6-A0IG-01	Low	1.05872	3.6479	0.876277	1.57565	1.95405	1.35926	3.06347	1.94681	1.39762
TCGA-B6-A0IH-01	Low	0.738858	5.85134	2.11329	2.36571	3.60305	1.32902	3.50226	2.52903	2.5912
TCGA-B6-A0IJ-01	Low	0.388091	5.06592	3.81723	2.90972	3.32366	3.17345	5.12254	4.25148	3.64389
TCGA-B6-A0IK-01	Low	0.932906	3.97958	1.50353	1.63174	2.3509	1.9998	3.62776	1.89358	2.00925
TCGA-B6-A0IM-01	High	1.14833	3.39948	0.593557	1.5844	2.23616	0.714646	4.30431	0.688406	0.840166
TCGA-B6-A0IN-01	Low	1.01333	5.10535	2.3917	1.75564	2.41666	2.17944	4.34586	1.63173	2.6661
TCGA-B6-A0IO-01	Low	0.700612	3.54609	1.10794	1.30541	1.74395	1.16254	3.48037	1.88651	1.30664
TCGA-B6-A0IP-01	Low	0.804673	4.22267	1.74571	2.40688	1.8963	1.09224	3.53633	1.50529	2.08686
TCGA-B6-A0IQ-01	Low	0.654822	3.66253	2.27184	1.81558	1.94966	2.5337	3.06873	3.00573	2.52618
TCGA-B6-A0RE-01	Low	0.738619	3.90144	0.782692	1.78374	2.47658	1.32302	3.50507	2.18778	1.28206
TCGA-B6-A0RG-01	High	1.38583	2.68814	0.494145	1.43564	1.84659	0.785878	2.95132	0.730604	0.542826
TCGA-B6-A0RH-01	Low	0.807537	3.3981	0.719115	2.56477	2.39216	1.26528	3.65757	3.53606	1.14368
TCGA-B6-A0RI-01	High	1.12822	3.42617	0.657008	3.52412	2.56026	0.847081	4.9142	1.01414	0.530943
TCGA-B6-A0RL-01	High	1.20312	1.77948	1.38694	1.42138	0.502315	0.354756	2.59881	2.13587	0.0904262
TCGA-B6-A0RM-01	High	1.53179	3.18378	0.923237	1.91366	1.43024	0.725246	3.21362	0.912573	1.02079
TCGA-B6-A0RN-01	Low	0.949785	3.47048	0.825122	1.7999	2.10801	0.621666	3.35336	0.890724	1.10545
TCGA-B6-A0RO-01	High	1.11338	3.94573	2.27106	0.515928	1.24676	0.542841	3.62494	0.658013	0.458518
TCGA-B6-A0RP-01	Low	0.812071	4.71631	1.52234	1.99751	2.49597	1.01329	4.70345	1.80429	1.57496
TCGA-B6-A0RQ-01	Low	1.0707	5.40984	0.756088	1.81879	1.68805	0.504006	3.50294	0.521164	0.458634
TCGA-B6-A0RS-01	High	1.25778	4.24539	2.10009	2.86643	2.91547	2.93648	4.84823	2.9158	2.53749
TCGA-B6-A0RT-01	Low	0.375526	6.08132	5.3099	4.26616	4.56182	5.24991	5.60482	5.98701	5.85859
TCGA-B6-A0RU-01	High	1.12487	5.04961	0.764493	1.26448	2.49112	1.03224	3.26326	2.99289	1.54994
TCGA-B6-A0RV-01	Low	0.872584	4.91926	1.59359	2.4195	2.41207	1.92965	3.49074	2.01981	2.86858
TCGA-B6-A0WS-01	Low	0.811078	4.76173	4.01607	2.55379	3.18417	3.02434	4.38809	2.73088	3.68752
TCGA-B6-A0WT-01	High	1.33466	3.88313	0.901117	2.23535	2.83671	2.22028	4.09549	1.55523	2.16904
TCGA-B6-A0WV-01	Low	1.04922	2.05169	0.420174	1.61492	1.14328	0.658044	2.70097	1.04903	0.244147
TCGA-B6-A0WW-01	High	1.61369	3.48989	1.15063	2.47481	2.75224	1.21565	3.81048	1.93569	1.11098
TCGA-B6-A0WX-01	Low	0.829467	4.93787	2.28212	1.70729	2.63437	2.77455	4.09186	1.76976	2.96424
TCGA-B6-A0WY-01	Low	0.9282	4.98301	1.69803	2.53125	3.16506	1.45462	4.22809	2.78845	1.84669
TCGA-B6-A0WZ-01	Low	0.526283	3.69182	0.517683	2.31687	1.49517	0.797332	3.17296	0.821976	0.317447
TCGA-B6-A0X0-01	Low	0.627507	3.4767	0.663403	1.60547	1.03119	0.158896	2.68944	0.917227	1.00943
TCGA-B6-A0X1-01	Low	1.0426	4.46429	3.64704	3.35487	3.66134	3.17049	5.05098	5.8967	3.38424
TCGA-B6-A0X4-01	High	1.12767	2.66272	0.072776	1.70625	0.836899	0.331087	2.33746	1.17163	0.17082
TCGA-B6-A0X5-01	High	1.18144	3.83793	2.72934	3.24756	1.74256	0.307951	3.55028	1.85123	0.465679
TCGA-B6-A0X7-01	Low	0.873076	4.65873	0.299105	1.93674	2.38854	0.699152	3.35822	1.43696	0.772479
TCGA-B6-A1KC-01	Low	0.951314	3.26201	0.166633	1.539	1.45999	0.741137	3.89205	0.933934	0.711413
TCGA-B6-A1KF-01	High	1.15334	4.0088	0	0.420548	1.82177	0.113667	1.84045	0.512485	0.174269
TCGA-B6-A1KI-01	High	1.09911	3.72233	0.354456	0.958671	1.07005	0.065277	2.62272	0.292505	0.215492
TCGA-B6-A1KN-01	High	1.6499	3.65807	1.4306	2.77114	2.38657	2.37085	4.00417	2.11424	1.54934
TCGA-B6-A2IU-01	Low	0.970307	4.12875	0.375694	2.98672	1.61385	1.07884	3.08411	0.598774	0.827253
TCGA-B6-A3ZX-01	Low	0.719468	5.9357	5.48438	2.45771	3.16587	4.77993	4.16257	3.72171	5.05544
TCGA-B6-A400-01	High	1.18567	4.00063	2.60284	2.99662	3.37043	3.79718	4.54377	2.95935	2.82499
TCGA-B6-A401-01	Low	0.795849	4.56385	2.3055	1.77912	2.1102	2.55027	4.19171	2.53451	2.24904
TCGA-B6-A402-01	High	1.33767	3.23879	0.512506	1.16955	1.75511	0.782215	3.20242	1.92282	0.639671
TCGA-B6-A408-01	Low	0.913323	4.79195	3.08392	2.26924	3.29755	3.97502	4.56363	4.20089	3.37558
TCGA-B6-A409-01	High	1.15567	4.42171	1.21322	1.21457	1.87693	1.47736	3.65458	1.95714	1.19093
TCGA-B6-A40B-01	High	1.19201	3.84746	1.1234	1.49546	1.99745	1.30397	4.16752	3.56557	0.825076
TCGA-B6-A40C-01	Low	0.712567	4.44954	1.68473	1.65325	1.97625	2.06001	4.90431	2.8041	1.92731
TCGA-BH-A0AU-01	High	1.38267	4.03611	2.42179	2.26888	3.42744	2.3592	4.20618	2.43773	3.11821
TCGA-BH-A0AV-01	High	1.14367	4.25171	0.988593	1.92933	3.61792	0.700056	4.18626	1.3373	1.40376
TCGA-BH-A0AW-01	Low	0.840062	4.86916	3.53011	3.05007	4.21892	3.72634	5.26949	3.77649	4.3347
TCGA-BH-A0AY-01	Low	1.01754	5.30738	1.58039	1.7835	2.94606	1.15151	4.95097	2.32909	2.27881
TCGA-BH-A0AZ-01	High	1.16126	4.7156	1.10238	1.60194	3.04406	0.634312	4.19547	0.928235	1.39707
TCGA-BH-A0B0-01	Low	0.837105	5.69419	2.10219	3.33773	2.63539	2.76891	4.65616	2.24787	3.34775
TCGA-BH-A0B1-01	High	1.44629	3.90001	0.587159	2.3702	2.94013	1.30404	3.3626	1.21434	1.77288
TCGA-BH-A0B3-01	Low	0.927579	4.5222	2.49925	3.39548	4.13473	3.20758	4.78808	3.79863	2.82152
TCGA-BH-A0B4-01	Low	0.971888	4.61125	1.95459	2.0937	2.71592	1.60001	4.4536	2.12344	2.20741
TCGA-BH-A0B5-01	Low	0.869116	4.38904	2.28408	3.15284	3.36457	2.87542	4.72123	3.60019	2.29839
TCGA-BH-A0B6-01	Low	0.57438	5.89581	4.73335	3.93928	4.07061	2.91168	4.41516	5.05145	4.2554
TCGA-BH-A0B7-01	Low	0.773957	5.0854	3.23452	2.26747	3.37339	2.54918	4.30271	2.37617	3.41176
TCGA-BH-A0B8-01	Low	1.06391	3.69058	0.939577	1.76848	2.09834	1.12228	3.96794	1.22063	1.14646
TCGA-BH-A0B9-01	Low	0.56529	4.39536	3.42141	2.45939	3.00509	3.43656	4.91674	4.37124	3.49796
TCGA-BH-A0BA-01	High	1.10494	4.77822	2.24442	2.1163	2.96459	1.88825	3.41462	1.72307	1.82191
TCGA-BH-A0BC-01	Low	1.02202	5.51013	2.04301	2.0358	3.15911	2.35432	5.62288	3.15138	3.22573
TCGA-BH-A0BD-01	Low	0.846615	4.36685	2.08874	2.81933	3.38029	2.38348	4.88445	2.81481	2.67112
TCGA-BH-A0BF-01	Low	0.594133	5.46913	3.5011	3.49375	4.6803	4.10015	5.14512	4.90518	4.35095
TCGA-BH-A0BG-01	Low	0.753358	5.09553	3.3232	3.58643	3.86217	3.38432	4.69221	4.02589	3.88869
TCGA-BH-A0BJ-01	Low	0.807479	4.74944	1.58358	1.77234	2.59511	0.850864	4.61597	1.36481	1.79434
TCGA-BH-A0BL-01	Low	0.777418	4.94659	3.36779	3.57417	4.61287	3.6569	5.06011	3.48623	3.6182
TCGA-BH-A0BM-01	Low	0.713116	4.41609	1.05099	1.97895	2.51089	0.859508	3.31264	1.20571	1.31509
TCGA-BH-A0BO-01	High	1.64148	5.7359	2.39971	4.79122	3.359	1.61044	4.87076	1.66432	0.99248
TCGA-BH-A0BP-01	High	1.1905	5.00943	1.73495	1.69765	2.26567	1.09514	4.92632	1.42192	1.65512
TCGA-BH-A0BQ-01	Low	0.723173	5.232	2.31209	1.86244	2.87807	1.18718	3.92709	2.10939	2.16947
TCGA-BH-A0BR-01	High	1.33475	4.65174	1.8647	2.75662	3.36559	2.20258	5.28861	1.8615	2.35028
TCGA-BH-A0BT-01	Low	0.602881	3.65653	1.88239	3.0554	2.58639	2.43031	3.68834	3.02167	2.44007
TCGA-BH-A0BV-01	Low	0.986366	4.45017	1.63899	1.81552	2.96303	1.73571	4.93175	2.395	2.18288
TCGA-BH-A0BW-01	High	1.28465	5.02408	4.03907	4.53404	5.27516	4.08547	5.48773	5.77022	3.27535
TCGA-BH-A0BZ-01	Low	0.732321	4.93896	3.43041	3.60347	4.17287	2.9926	5.40644	4.27498	3.62312
TCGA-BH-A0C0-01	Low	0.974841	5.11967	4.68856	4.34384	4.88692	4.17545	5.68856	5.75044	4.42062
TCGA-BH-A0C1-01	Low	1.04999	4.44904	1.48395	2.57426	3.68041	2.32874	3.72365	2.17582	2.29142
TCGA-BH-A0C3-01	High	1.17529	5.54459	1.79398	2.56252	3.91954	2.17102	4.44185	2.09404	2.51547
TCGA-BH-A0C7-01	High	1.20962	3.72944	1.15898	2.03739	2.37781	1.30155	3.75582	1.65971	1.65479
TCGA-BH-A0DD-01	High	1.52688	3.5243	1.80132	2.90872	3.05221	2.38319	3.87255	3.38803	2.34153
TCGA-BH-A0DE-01	Low	0.860721	5.04668	1.85152	2.9472	3.34857	1.8798	5.31842	2.46962	2.16497
TCGA-BH-A0DG-01	Low	1.07598	4.95218	1.86905	1.94453	3.27725	2.49546	5.06605	2.91	2.4196
TCGA-BH-A0DH-01	Low	0.683888	4.10314	1.17433	2.75364	1.36638	0.967102	4.12221	1.57885	1.25179
TCGA-BH-A0DI-01	High	1.2217	5.29196	2.21177	2.26125	3.26537	1.78185	4.79505	2.02151	2.1961
TCGA-BH-A0DK-01	Low	0.844378	5.25207	3.0872	2.40593	3.44551	3.48327	4.64676	3.47602	4.08001
TCGA-BH-A0DL-01	Low	0.847841	5.45806	3.04571	4.53931	4.13239	4.03588	5.16649	3.8051	3.00274
TCGA-BH-A0DO-01	Low	1.05111	4.65809	0.863073	2.21034	2.00844	0.40003	3.29061	0.915841	1.00956
TCGA-BH-A0DP-01	Low	0.683371	5.03087	2.16754	2.5648	2.28554	1.18966	4.70218	1.92782	1.9472
TCGA-BH-A0DQ-01	High	1.30755	4.95864	1.10777	1.53714	2.68661	1.22887	4.70122	1.20485	1.19929
TCGA-BH-A0DS-01	Low	1.03161	4.28133	1.65264	1.54363	2.34659	1.75705	5.14281	1.82643	1.95543
TCGA-BH-A0DT-01	Low	0.761388	4.93012	2.20764	2.60091	2.98593	2.55815	3.76872	1.59408	2.24529
TCGA-BH-A0DV-01	Low	0.969683	6.07103	1.51977	1.98282	2.7093	0.249647	4.43535	1.37372	0.955559
TCGA-BH-A0DX-01	High	1.16528	4.96684	1.66439	2.19975	2.82604	1.80806	6.05835	1.91357	1.58512
TCGA-BH-A0DZ-01	High	1.12074	3.86555	1.44298	2.97523	3.52468	1.28671	4.49011	2.45171	1.62105
TCGA-BH-A0E0-01	High	1.28566	3.74555	0.81844	1.85898	1.41333	2.78667	2.9165	0.580284	2.44322
TCGA-BH-A0E1-01	High	1.12409	3.78836	0.389801	0.969251	1.37969	0.388834	3.24575	0.695931	0.403809
TCGA-BH-A0E2-01	High	1.13282	3.61445	1.56504	2.35168	3.03412	1.12826	3.98833	1.95586	2.211
TCGA-BH-A0E6-01	Low	0.260718	4.66935	3.24486	1.12916	2.67436	1.52727	3.39116	3.05245	2.21408
TCGA-BH-A0E7-01	High	1.33995	3.51542	0	2.94184	1.8015	0.527246	3.66834	0.432717	0.386377
TCGA-BH-A0E9-01	Low	0.857028	5.61978	2.1159	2.79906	3.14083	1.71733	3.87081	1.34358	1.80791
TCGA-BH-A0EA-01	Low	0.863539	5.71802	1.65514	1.99699	2.84817	0.707782	3.88937	1.69172	1.3075
TCGA-BH-A0EB-01	Low	0.87554	5.09619	1.56717	2.40428	3.38478	2.27171	5.56439	2.02702	2.89588
TCGA-BH-A0EE-01	Low	0.914446	4.1108	1.27453	3.91254	2.34414	2.20595	2.96654	3.20235	2.17297
TCGA-BH-A0EI-01	Low	1.05789	3.9749	0.200738	1.8981	2.31322	0.862947	4.19686	0.648908	0.589929
TCGA-BH-A0GY-01	High	1.81057	3.85152	1.58354	3.00341	3.40724	2.18875	5.42336	2.19722	2.18247
TCGA-BH-A0GZ-01	High	1.21926	4.05289	0.918573	1.30946	2.00079	0.916648	3.43959	1.21141	0.825738
TCGA-BH-A0H0-01	High	1.16191	3.685	1.24976	1.56424	1.85254	1.179	3.22692	1.74201	1.42412
TCGA-BH-A0H3-01	Low	0.969478	5.04911	1.3723	2.40395	2.99687	1.78346	4.0059	1.3284	2.06823
TCGA-BH-A0H5-01	Low	0.571427	6.31513	4.84595	4.29503	4.48974	4.73929	5.346	4.85726	5.09089
TCGA-BH-A0H6-01	High	1.40628	3.3739	1.0248	2.69456	2.22109	0.868209	3.82099	0.729862	0.962018
TCGA-BH-A0H7-01	High	1.2785	3.60273	0.820644	1.45301	2.69577	1.09213	3.8905	1.53811	2.02605
TCGA-BH-A0H9-01	High	1.32611	3.32748	0.937445	0.720307	1.62251	0.846775	3.50076	1.02056	0.7779
TCGA-BH-A0HA-01	Low	0.74268	4.26333	2.42936	2.27985	3.18121	2.80281	4.5576	3.50042	3.37866
TCGA-BH-A0HB-01	High	1.13276	4.12339	2.47193	2.40164	3.23885	2.30991	4.38232	3.34266	2.96507
TCGA-BH-A0HF-01	High	1.14867	5.07144	1.43289	2.39429	2.57618	0.929058	5.37924	1.03227	1.73143
TCGA-BH-A0HI-01	Low	1.02845	4.42143	0.9575	1.86052	1.98072	1.14251	4.48461	0.914031	1.26368
TCGA-BH-A0HK-01	High	1.08472	4.81054	0.84109	2.00031	2.46077	0.73514	3.34575	0.876245	1.15626
TCGA-BH-A0HL-01	High	1.08395	2.37063	3.39965	0.78195	0.850697	0.0927301	2.16278	0.613166	0.0966911
TCGA-BH-A0HN-01	Low	0.863975	3.82414	0.328995	0.840654	0.652955	0.595338	3.69565	1.711	0.199327
TCGA-BH-A0HO-01	Low	0.913439	4.14662	1.25608	1.73765	2.11249	1.11237	5.17645	1.86445	1.22268
TCGA-BH-A0HP-01	Low	0.942574	4.82318	1.24879	2.32445	3.43865	1.53514	4.46653	1.63546	1.75634
TCGA-BH-A0HQ-01	Low	1.06721	4.37612	0.552605	2.02811	1.9285	0.0597846	3.94774	0.692763	0.48296
TCGA-BH-A0HU-01	Low	0.957022	3.10192	1.31541	1.40025	1.69404	1.2423	3.06406	2.35014	1.46837
TCGA-BH-A0HW-01	High	1.11404	2.56432	0.225899	1.26042	0.750026	0.35807	2.45686	1.58177	0.21024
TCGA-BH-A0HX-01	High	1.0913	4.23593	1.4246	2.29296	2.32939	1.06723	4.41337	1.51051	1.41405
TCGA-BH-A0HY-01	High	1.13553	3.52124	0.538334	1.18912	1.76421	0.852305	3.69968	1.44404	0.683009
TCGA-BH-A0RX-01	Low	0.342016	5.32869	3.78138	3.03527	4.2387	3.60142	5.00932	4.82111	4.06871
TCGA-BH-A0W3-01	Low	0.9967	4.10893	0.584717	1.56292	1.8798	1.03316	4.53025	0.787408	0.818166
TCGA-BH-A0W4-01	Low	1.03311	4.06644	0.55433	1.90229	2.13094	0.708411	3.76644	0.945559	0.418793
TCGA-BH-A0W5-01	Low	0.748351	5.46641	3.84885	3.24368	3.48587	3.47249	4.60086	2.43406	4.69227
TCGA-BH-A0W7-01	Low	0.811074	5.00798	3.15617	3.1876	3.6599	3.14705	5.10518	3.94166	3.95615
TCGA-BH-A0WA-01	Low	0.916325	4.77763	1.49626	2.96082	3.81896	2.06858	3.95126	3.04531	2.12019
TCGA-BH-A18F-01	Low	0.857976	4.85819	2.00785	2.28607	2.93107	1.68245	4.0242	2.49941	2.77804
TCGA-BH-A18G-01	High	1.29491	4.17527	0.890331	0.942955	2.71588	1.01537	3.37088	1.71077	1.54145
TCGA-BH-A18H-01	Low	0.779703	4.86468	3.79479	3.9537	3.58999	3.67737	4.9885	4.63504	4.32113
TCGA-BH-A18I-01	High	1.1323	4.47407	2.64621	3.76797	3.5598	3.38652	5.2765	2.42601	3.46048
TCGA-BH-A18J-01	High	1.44359	4.5186	1.02818	1.82408	2.75468	1.27811	4.21586	1.86848	0.994287
TCGA-BH-A18K-01	High	1.20566	4.05473	0.535556	1.35226	2.30213	0.685546	4.14867	2.13691	0.813733
TCGA-BH-A18L-01	High	1.38353	3.47826	1.07564	1.60831	1.84626	0.44172	3.50648	2.39671	0.967823
TCGA-BH-A18M-01	High	1.30879	4.62886	1.14337	2.39526	2.76474	0.850955	4.26313	1.79003	1.13436
TCGA-BH-A18N-01	High	1.2074	4.01374	0.197718	1.41301	1.90965	0.597065	3.91268	0.993253	0.480353
TCGA-BH-A18P-01	Low	0.735483	3.52964	1.36709	3.11451	2.73281	2.0255	3.92373	2.96882	2.2073
TCGA-BH-A18Q-01	Low	1.04518	5.24328	2.44733	3.18203	3.87338	2.47663	4.13069	4.09564	2.69822
TCGA-BH-A18R-01	High	1.46764	3.79357	1.0903	2.16558	2.64471	1.88168	3.57009	1.99431	2.24432
TCGA-BH-A18S-01	High	1.09317	3.43391	0.655251	1.40505	1.15284	0.11356	3.60306	0.577604	0.743808
TCGA-BH-A18T-01	High	1.2531	2.98164	1.52055	1.96355	2.41087	2.57539	3.7832	2.78816	1.79699
TCGA-BH-A18U-01	High	1.16088	3.58882	1.74901	2.51609	3.29594	2.62339	4.59289	3.17989	2.0863
TCGA-BH-A18V-01	High	1.36713	5.19987	2.03477	3.05764	3.87542	3.16286	5.1728	3.52866	3.0677
TCGA-BH-A18V-06	Low	0.628292	6.41683	5.5084	3.89181	4.47819	4.28488	5.71089	5.87068	4.79204
TCGA-BH-A1EN-01	High	1.26233	3.20637	0.455942	3.69078	1.29136	0.245268	3.64307	0.351035	0.634918
TCGA-BH-A1EO-01	High	1.72144	4.64838	1.2838	2.63923	3.33407	2.05642	5.91735	1.13704	2.84878
TCGA-BH-A1ES-01	High	1.58136	3.24491	0	1.42666	2.44317	1.21799	4.2983	1.26946	1.03301
TCGA-BH-A1ES-06	High	1.26006	3.18165	0.609514	0.673749	0.902577	0.109212	1.91113	0.862585	0.219367
TCGA-BH-A1ET-01	Low	0.745553	4.02779	1.08605	2.01115	2.50533	1.61845	4.11037	1.26723	1.50878
TCGA-BH-A1EU-01	High	1.34106	5.5344	2.56261	3.89687	4.32545	3.36586	5.63004	2.61947	3.89349
TCGA-BH-A1EV-01	High	1.7465	3.10782	0.476174	1.44342	2.4375	0.68045	3.92081	4.22923	0.318191
TCGA-BH-A1EW-01	High	1.51087	4.37422	2.88894	3.06243	3.27983	2.7341	4.5917	2.45575	3.20917
TCGA-BH-A1EX-01	High	1.30491	4.06551	1.77566	2.37702	3.45171	2.66262	5.17668	1.82032	2.66927
TCGA-BH-A1EY-01	High	1.7919	4.73663	2.56504	2.78762	3.646	3.61595	5.18993	2.54084	3.57916
TCGA-BH-A1F0-01	High	1.60487	6.0375	3.92722	4.15729	4.86021	4.05921	6.01268	5.04734	4.31645
TCGA-BH-A1F2-01	High	1.85179	3.82781	0.40075	1.55205	2.68662	0.334838	4.89774	1.56227	0.656133
TCGA-BH-A1F5-01	High	1.28563	3.32377	0.238894	2.77758	2.37444	0.364376	3.50695	1.30451	0.817653
TCGA-BH-A1F6-01	High	1.10133	5.27481	1.62802	2.9023	3.7071	2.4554	5.10484	4.55714	2.16279
TCGA-BH-A1F8-01	High	1.57632	3.34009	1.85234	2.03506	2.97423	1.41881	3.90175	1.61545	1.28285
TCGA-BH-A1FB-01	High	1.40679	5.417	2.61791	3.45331	4.09828	4.005	4.71875	2.30278	4.03913
TCGA-BH-A1FC-01	Low	0.685026	4.50053	3.85616	2.7416	3.59876	3.24735	4.76489	4.68237	3.76848
TCGA-BH-A1FD-01	High	1.74238	3.62555	0.733769	3.25237	3.30225	2.23839	5.13386	3.36007	1.88147
TCGA-BH-A1FE-01	Low	1.04232	4.90639	2.04709	3.51376	4.095	3.36308	4.53919	3.03642	4.10148
TCGA-BH-A1FE-06	High	2.21292	7.02088	0.856458	4.18607	3.05876	0.601514	3.30235	2.68936	0.370258
TCGA-BH-A1FG-01	High	1.34809	3.5271	0.585103	1.61307	2.17653	0.831283	3.77962	1.15869	0.655354
TCGA-BH-A1FH-01	High	1.2193	5.3711	1.13404	2.41128	3.69059	0.915235	3.79039	1.7175	1.12444
TCGA-BH-A1FJ-01	High	1.10536	2.90749	0.18667	1.62755	1.58509	0.470594	3.1374	1.04978	0.448223
TCGA-BH-A1FL-01	High	1.08959	3.97372	1.3841	2.26645	2.03131	1.09658	3.61373	1.81192	1.71636
TCGA-BH-A1FM-01	High	1.96334	2.63906	0.0479936	1.75162	2.63241	0.455265	4.15426	0.706449	0.566904
TCGA-BH-A1FN-01	High	1.77439	4.33211	0.869233	3.09014	3.6899	1.54769	4.50915	2.60485	1.216
TCGA-BH-A1FR-01	High	1.15624	5.0648	1.61466	1.68872	2.01028	0.666835	4.67273	2.39123	1.61455
TCGA-BH-A1FU-01	High	1.31966	4.76343	2.23739	2.34616	3.24089	2.04107	3.79265	1.49098	3.0904
TCGA-BH-A201-01	High	1.48091	4.36756	0.651348	3.86202	3.3317	0.430536	4.52385	1.25192	0.712077
TCGA-BH-A202-01	High	1.14906	3.55922	2.2255	3.18674	3.49381	3.00692	5.01425	3.15588	3.15008
TCGA-BH-A203-01	High	1.14564	3.69482	1.43659	2.27694	2.75717	3.57128	4.53658	2.7702	2.9314
TCGA-BH-A204-01	High	1.2218	2.86105	0.0958125	1.86333	1.93488	0.213838	4.02588	0.802547	0.152141
TCGA-BH-A208-01	High	1.50047	4.94592	0.622361	1.66522	2.75647	1.71283	4.15984	1.34278	1.78898
TCGA-BH-A209-01	Low	0.680567	4.74794	3.22133	3.72257	4.34645	4.23461	5.48886	5.21417	4.31577
TCGA-BH-A28O-01	Low	0.761579	5.86959	2.85139	2.28831	3.27375	2.15066	3.35683	1.85714	1.39839
TCGA-BH-A28Q-01	Low	0.947807	3.94157	1.13618	1.83178	2.56928	0.93276	3.87547	1.41977	1.17978
TCGA-BH-A2L8-01	Low	0.97353	4.99524	3.62434	2.92996	3.26579	3.62059	4.85321	3.94083	4.30871
TCGA-BH-A42T-01	High	1.42796	4.46216	4.52004	0.768241	1.48349	2.0633	4.52682	2.5176	1.78089
TCGA-BH-A42U-01	Low	0.881928	6.19412	3.12314	1.97372	2.86338	2.08008	3.37198	3.04649	2.3168
TCGA-BH-A42V-01	Low	0.923149	5.5309	2.60907	2.01114	2.94459	2.6665	3.48726	2.0135	2.18007
TCGA-BH-A5IZ-01	High	1.23155	4.8244	0.78801	1.23473	2.0972	0.427675	3.96311	1.66827	0.689314
TCGA-BH-A5J0-01	High	1.11227	5.14983	2.84711	2.3216	3.25425	2.96464	5.37841	2.90015	2.67397
TCGA-BH-A6R8-01	Low	0.866826	3.91332	2.39653	3.17686	2.57632	3.10318	4.28436	3.92961	2.28828
TCGA-BH-A6R9-01	High	2.16552	5.36614	3.01033	5.09207	5.18765	3.48283	5.5328	3.3596	2.79403
TCGA-BH-A8FY-01	Low	1.07954	4.74688	0.128524	2.09911	1.14251	0.354715	4.39498	1.65956	0.154691
TCGA-BH-A8FZ-01	Low	1.01827	5.31324	3.11457	4.02581	3.696	3.37311	5.03571	2.32362	3.04708
TCGA-BH-A8G0-01	Low	0.954725	5.73461	2.89583	2.72444	3.73409	2.64071	4.82245	2.05108	2.49976
TCGA-BH-AB28-01	Low	0.958738	4.93547	2.43609	1.55437	2.67597	2.71583	4.26786	1.76887	2.48738
TCGA-C8-A12L-01	Low	0.988681	3.35482	2.27931	4.06073	2.86704	1.98915	3.80216	2.47431	1.99702
TCGA-C8-A12M-01	Low	0.781606	4.15863	1.96993	2.25707	2.33671	1.84701	2.80595	2.00981	2.34152
TCGA-C8-A12N-01	Low	0.975255	3.77426	0.851984	2.52478	2.82792	1.73912	4.7941	1.95646	1.67197
TCGA-C8-A12O-01	High	1.21989	4.425	1.28939	2.25267	3.16134	2.41155	5.22576	2.26196	2.36592
TCGA-C8-A12P-01	High	1.36873	4.15943	1.29881	3.2389	3.35016	2.06459	4.67754	2.98304	2.1162
TCGA-C8-A12Q-01	Low	1.01663	3.76934	1.42218	2.31271	2.83878	1.71339	4.91287	1.548	1.94781
TCGA-C8-A12U-01	Low	0.532472	3.79851	2.96104	2.51996	2.80695	2.62335	4.01161	3.98434	3.06797
TCGA-C8-A12V-01	Low	0.526322	6.19714	4.75597	5.05468	5.70958	5.02604	6.05767	7.16507	4.90167
TCGA-C8-A12W-01	High	1.29582	4.58465	1.82823	2.08832	2.49277	1.31075	5.00754	2.59859	1.77883
TCGA-C8-A12X-01	Low	0.466644	4.57488	1.27874	1.67892	2.63362	0.500614	3.89761	2.49706	0.388887
TCGA-C8-A12Y-01	High	1.22603	3.86533	1.72422	1.84861	2.46959	1.54512	3.82801	3.16246	1.35203
TCGA-C8-A12Z-01	High	1.36529	3.16286	0.521074	1.01262	1.41222	0.438209	3.18044	1.20986	0.425614
TCGA-C8-A130-01	High	1.29673	4.3186	1.69867	1.41453	2.30924	1.99899	3.97126	2.74676	2.10484
TCGA-C8-A131-01	Low	0.981837	3.81813	1.24654	1.90738	2.7885	1.30853	3.23443	2.09544	1.47526
TCGA-C8-A132-01	High	1.1608	5.03436	3.03192	3.05593	3.7367	3.21437	4.22488	3.36447	3.55136
TCGA-C8-A134-01	Low	0.645834	4.91179	2.21103	3.25037	4.15198	3.31676	4.5487	3.72096	3.33639
TCGA-C8-A135-01	High	1.20229	4.20997	1.50425	1.78975	2.55086	1.21334	4.2836	1.91453	2.39813
TCGA-C8-A137-01	High	1.78515	2.65795	0.71092	0.893073	1.91024	0.910191	3.23872	0.831407	0.79169
TCGA-C8-A138-01	Low	0.866401	4.68489	3.12098	2.76907	3.65093	3.01308	4.52792	4.72239	3.4618
TCGA-C8-A1HE-01	High	1.14965	3.81678	0.945504	1.32926	1.75675	0.835726	4.34396	1.16923	1.16684
TCGA-C8-A1HF-01	Low	0.986805	4.0635	3.5792	3.10019	3.90085	3.38426	4.88048	4.55462	3.82967
TCGA-C8-A1HG-01	Low	0.748712	4.19066	3.13431	2.44254	3.48633	3.42117	4.65186	4.15734	3.80101
TCGA-C8-A1HI-01	High	1.48174	4.30568	0.759985	1.79224	2.3389	0.342192	3.86547	1.69079	0.847748
TCGA-C8-A1HJ-01	High	1.46494	3.47554	0.727035	2.36836	2.56431	3.4101	2.89906	2.60978	2.0303
TCGA-C8-A1HK-01	High	1.65448	3.21438	0.984636	1.67026	2.34568	2.08864	3.80233	2.90319	1.87546
TCGA-C8-A1HL-01	High	1.20071	4.13664	0.397496	0.915464	2.16467	1.20819	4.42287	1.68962	0.837062
TCGA-C8-A1HM-01	Low	0.928959	4.62321	4.99491	5.02631	4.75811	4.15762	5.56655	6.72879	4.51292
TCGA-C8-A1HN-01	High	1.13816	3.48141	0.936283	1.45038	2.05306	1.25067	4.69849	1.67122	1.45863
TCGA-C8-A1HO-01	Low	1.05202	3.34992	0.917406	3.28546	2.71387	1.16394	3.38766	3.43234	0.968042
TCGA-C8-A26V-01	High	1.22403	3.81374	1.95406	2.28863	2.76363	1.62058	3.84202	3.11145	1.90301
TCGA-C8-A26W-01	Low	1.02711	4.3701	2.42937	2.57681	3.03901	2.04932	4.71279	3.46821	2.96958
TCGA-C8-A26X-01	Low	0.599425	4.99724	2.7712	2.82198	3.46327	2.67855	4.66559	3.69028	3.02589
TCGA-C8-A26Y-01	Low	0.866628	4.01949	1.40839	3.10363	2.02615	2.3718	3.66113	1.99504	3.43975
TCGA-C8-A26Z-01	High	1.75807	2.97495	0.568426	1.15569	1.7707	0.621234	3.0872	0.972954	0.587658
TCGA-C8-A273-01	High	1.37937	3.86713	0.864185	1.38982	2.1549	2.00291	3.9732	1.95378	1.10915
TCGA-C8-A274-01	Low	1.03056	3.93123	0.703734	1.60393	2.17586	1.08242	3.81864	1.55029	0.976513
TCGA-C8-A275-01	Low	1.02211	4.44954	2.95268	3.44212	3.65354	3.79446	4.99728	4.24007	3.398
TCGA-C8-A278-01	Low	0.992885	4.44525	2.26128	3.55248	4.20446	3.5542	4.96012	3.87803	3.18763
TCGA-C8-A27A-01	Low	0.811126	3.17799	0.848266	2.06996	2.42969	2.17361	3.7673	3.59808	1.273
TCGA-C8-A27B-01	Low	0.880334	4.82485	2.45872	4.94458	5.20491	2.71077	5.02954	3.91784	3.32247
TCGA-C8-A3M7-01	High	1.09935	5.39786	1.35379	2.26747	2.81278	1.402	3.06895	2.30633	1.58039
TCGA-C8-A3M8-01	High	1.35066	3.8642	0.528896	0.964756	1.28901	0.527642	3.36164	0.967179	0.616732
TCGA-C8-A8HP-01	Low	0.820874	5.15672	3.42566	2.89431	3.33188	3.80294	4.5023	4.94043	3.30235
TCGA-C8-A8HQ-01	High	1.17789	4.44603	2.53613	2.84462	3.43001	3.11898	4.71801	3.54924	3.02122
TCGA-C8-A8HR-01	Low	0.795002	5.85106	2.75989	2.69265	3.46698	2.84345	4.50078	3.48583	2.80668
TCGA-D8-A13Y-01	High	1.47382	2.48544	2.73075	1.11676	1.47761	0.108469	3.2358	3.49722	0
TCGA-D8-A13Z-01	High	1.34697	4.39374	2.23998	3.07057	3.46961	2.69038	4.72039	3.0285	2.61267
TCGA-D8-A140-01	Low	0.913793	4.21937	1.78682	2.56914	3.06437	2.86163	3.92136	3.20251	2.62978
TCGA-D8-A141-01	Low	1.0751	5.24319	3.79282	3.89097	4.27569	3.91761	5.25763	3.6677	4.42553
TCGA-D8-A142-01	Low	1.00478	4.60451	1.36214	1.95738	3.17398	2.15377	4.43419	2.00885	1.96165
TCGA-D8-A143-01	High	1.2788	4.23893	2.29935	2.00691	2.74121	2.22687	3.67353	2.33221	2.2486
TCGA-D8-A145-01	High	1.23525	5.18194	2.22571	1.78761	2.86243	1.11101	3.8022	2.36548	1.6186
TCGA-D8-A146-01	Low	1.03683	4.77786	1.73816	2.1287	2.98531	1.52481	4.4263	1.87863	2.25202
TCGA-D8-A147-01	High	1.13055	4.38064	3.84648	2.88381	3.48191	3.08518	4.66523	3.71694	3.22097
TCGA-D8-A1J8-01	High	1.12882	3.82005	2.78733	4.92466	5.29264	3.67198	5.63043	4.77165	3.3343
TCGA-D8-A1J9-01	High	1.64382	3.85176	0.923346	1.88178	3.44679	2.05772	4.92029	2.47193	1.5275
TCGA-D8-A1JA-01	High	1.34226	3.50206	0.558059	3.18823	4.08108	1.36168	4.68293	2.69631	1.39509
TCGA-D8-A1JB-01	Low	0.84909	5.4839	3.39425	3.48182	3.71749	3.37256	4.48326	3.63805	4.43874
TCGA-D8-A1JC-01	High	1.43877	4.2006	2.81794	3.12052	3.68723	2.89841	4.60412	3.2452	2.74123
TCGA-D8-A1JD-01	High	1.77882	3.93734	1.5321	2.34891	3.77674	3.13565	5.27946	2.15597	2.89376
TCGA-D8-A1JE-01	High	1.46104	5.20074	0.50254	2.88004	3.41072	0.957439	5.23165	3.08002	1.62415
TCGA-D8-A1JF-01	High	1.46029	3.5047	0.796075	1.63911	2.62283	1.50973	4.08404	1.02517	1.96115
TCGA-D8-A1JG-01	High	1.22263	4.07834	3.21001	3.37767	4.04838	3.2674	4.74796	3.3978	3.13103
TCGA-D8-A1JH-01	High	1.58048	5.15389	1.703	2.65334	3.4486	2.11162	4.94735	1.86755	2.67977
TCGA-D8-A1JI-01	High	1.34365	3.88582	0.599278	1.22982	1.20795	0.807767	3.74822	1.9241	0.867809
TCGA-D8-A1JJ-01	High	1.39345	4.05855	0.958982	2.10742	3.28208	1.69399	4.96328	2.14003	1.63169
TCGA-D8-A1JK-01	Low	0.793382	4.41323	3.35879	3.57794	4.25473	2.54028	5.04133	3.75821	2.92448
TCGA-D8-A1JL-01	High	1.15114	5.03536	3.38374	4.33826	4.93811	4.24622	5.52898	5.34663	4.07024
TCGA-D8-A1JM-01	Low	0.928962	4.4206	2.2262	1.69704	1.77636	2.09705	2.96627	3.1808	2.27761
TCGA-D8-A1JN-01	Low	0.781492	3.62838	1.49108	1.9766	1.892	1.34198	3.47438	2.35129	1.76063
TCGA-D8-A1JP-01	High	1.25651	4.85192	2.14911	2.03348	3.62694	2.07053	4.88204	2.97236	2.4436
TCGA-D8-A1JS-01	Low	0.824578	3.24662	0.196063	1.20847	0.429732	0.0681691	2.79616	0.41755	0.171598
TCGA-D8-A1JT-01	High	1.44691	3.09242	0.154344	4.47401	3.05177	1.33345	4.41277	3.46684	0.603369
TCGA-D8-A1JU-01	Low	0.971724	5.44309	1.8122	2.37217	3.75333	1.84651	4.74359	1.87572	1.17279
TCGA-D8-A1X5-01	High	1.87311	3.79288	1.19606	2.31804	3.43179	1.93514	4.95406	1.62031	1.90554
TCGA-D8-A1X6-01	High	1.30754	4.66881	0.626721	2.1198	2.59101	1.29084	5.49411	2.17396	1.35363
TCGA-D8-A1X7-01	High	1.52093	3.65589	0.602264	1.77786	2.01291	0.627917	4.10866	0.922951	0.863272
TCGA-D8-A1X8-01	High	1.29131	5.15722	1.62247	1.93551	2.97319	1.15764	5.02885	1.42511	1.80391
TCGA-D8-A1X9-01	High	1.40285	4.05448	1.54962	2.97519	4.23463	3.27225	5.34452	3.51091	2.99707
TCGA-D8-A1XA-01	Low	1.05149	4.00044	1.14447	1.68288	2.71927	1.39813	4.30548	1.91937	1.52809
TCGA-D8-A1XB-01	High	1.19082	3.78233	0.831761	2.11635	2.56638	1.71561	4.01029	1.03226	1.59931
TCGA-D8-A1XC-01	High	1.41599	4.02311	0.112118	1.05746	0.722583	0.0569894	3.47604	1.21022	0.135099
TCGA-D8-A1XD-01	High	1.63496	3.17329	0.661977	1.21621	2.25499	0.976488	4.68669	1.00499	0.742958
TCGA-D8-A1XF-01	Low	0.860885	3.16805	1.04866	1.57516	1.61805	1.04655	3.1695	2.30524	1.03621
TCGA-D8-A1XG-01	High	1.489	4.49463	0.46589	2.14817	2.18378	0.204186	4.1433	2.63096	0.179246
TCGA-D8-A1XJ-01	High	1.68172	3.6661	1.19277	1.2568	2.16069	1.2539	4.00962	6.74046	0.993338
TCGA-D8-A1XK-01	High	1.19346	4.36902	2.62686	4.03221	3.6844	2.60528	4.49632	3.45409	2.85942
TCGA-D8-A1XL-01	High	1.19726	4.3073	3.47607	3.85758	3.59985	3.6358	5.03109	5.08556	3.27668
TCGA-D8-A1XM-01	Low	1.07452	4.85192	2.05238	2.69471	3.66031	2.64378	5.27322	2.1306	3.08056
TCGA-D8-A1XO-01	Low	0.781997	4.52331	1.6916	2.8007	3.31768	1.30644	5.04874	1.33539	1.84905
TCGA-D8-A1XQ-01	Low	1.06489	4.77409	2.84364	3.9262	4.43347	3.57667	5.05241	3.46958	2.99553
TCGA-D8-A1XR-01	Low	0.934324	4.06091	0.491011	1.40928	1.34494	0.463637	3.97799	1.69762	0.56062
TCGA-D8-A1XS-01	High	1.66525	3.77996	1.21083	2.20584	3.35254	2.27608	5.00457	1.63612	2.61911
TCGA-D8-A1XT-01	High	1.53731	4.08951	1.36147	2.67454	3.9253	2.20149	5.36232	2.92343	1.66024
TCGA-D8-A1XU-01	High	1.26818	3.96111	1.40114	1.71908	2.47727	1.66637	4.51571	1.54284	1.57791
TCGA-D8-A1XV-01	High	1.28274	2.42954	0.0399521	0.911844	0.947617	0.387365	2.80253	0.493554	0.348093
TCGA-D8-A1XW-01	High	1.15107	5.18887	1.53998	2.63958	3.55043	2.19467	5.83502	2.07411	2.72545
TCGA-D8-A1XY-01	High	1.61879	3.99931	0.683105	2.06984	3.42925	2.07385	4.5	2.50443	1.51524
TCGA-D8-A1XZ-01	High	1.37419	3.64387	1.58227	2.58815	3.33905	2.60262	4.91312	2.50773	2.81081
TCGA-D8-A1Y0-01	Low	1.02667	4.82794	2.41227	3.41554	4.05623	3.11269	4.92991	3.33522	3.60843
TCGA-D8-A1Y1-01	High	1.48357	4.34265	0.93774	1.78442	3.05292	0.878853	5.39439	2.03496	1.11633
TCGA-D8-A1Y2-01	High	1.21656	5.16838	2.58296	2.93342	3.80702	2.02258	6.33131	3.47393	2.92958
TCGA-D8-A1Y3-01	High	1.32271	3.58042	1.86229	1.92936	2.87138	2.52231	5.25809	4.14573	2.04154
TCGA-D8-A27E-01	High	1.18001	4.20777	1.37874	1.69396	2.37243	1.2436	3.98911	1.407	1.44788
TCGA-D8-A27F-01	High	1.88017	3.99791	0.459524	1.73555	3.29822	0.486192	3.64664	1.1161	1.16139
TCGA-D8-A27G-01	Low	1.03829	4.19636	2.78922	2.26172	2.95478	2.34467	4.55882	2.7533	2.90455
TCGA-D8-A27H-01	High	1.23896	6.71817	0.484501	1.31328	2.83733	1.09268	3.82314	1.28931	1.16091
TCGA-D8-A27I-01	High	1.18864	5.49893	2.36012	2.53012	3.52034	2.18559	4.39598	2.03774	2.67531
TCGA-D8-A27K-01	Low	0.918641	4.57789	2.4258	2.32663	2.93462	1.89421	4.52265	1.67242	2.27539
TCGA-D8-A27L-01	High	1.2221	4.83862	2.19813	2.90526	3.36299	2.73012	4.49612	1.78473	3.32698
TCGA-D8-A27M-01	Low	1.00117	5.36944	2.82864	4.55954	4.99416	4.0799	5.15768	3.75102	3.86913
TCGA-D8-A27N-01	High	1.45307	4.4203	1.43434	1.84809	3.17028	1.1585	5.62578	2.31331	1.52008
TCGA-D8-A27P-01	Low	0.946957	3.98903	0.521853	1.90779	1.87027	0.306887	3.7765	0.865664	0.682582
TCGA-D8-A27R-01	High	1.53592	4.41781	2.8687	1.96419	2.82726	1.63773	4.33433	2.13418	2.297
TCGA-D8-A27T-01	Low	1.06731	4.67144	1.71756	3.11884	3.27724	2.30276	4.70251	2.87032	2.57395
TCGA-D8-A27V-01	High	1.11415	4.60786	0.931488	2.97547	3.31843	0.898056	3.22372	1.76394	1.8642
TCGA-D8-A27W-01	High	1.52761	4.31423	1.48066	1.72881	2.771	1.11288	4.31363	1.73703	1.7926
TCGA-D8-A3Z5-01	Low	0.667384	5.36278	1.62482	1.36999	1.98084	0.581375	2.52881	2.36536	0.881321
TCGA-D8-A3Z6-01	High	1.25369	4.16562	0.793248	1.20442	1.41427	1.66094	3.46344	1.65759	0.835419
TCGA-D8-A4Z1-01	Low	0.809264	5.84729	2.40005	2.19129	3.07975	1.70843	3.46622	2.52548	1.77594
TCGA-D8-A73U-01	Low	0.378834	5.87994	3.78901	4.16583	4.56244	3.4303	5.369	4.51662	3.69215
TCGA-D8-A73W-01	High	1.21842	5.30204	1.37123	3.44498	3.26386	1.46375	4.75312	3.25	1.26755
TCGA-D8-A73X-01	Low	0.928855	4.03935	1.50618	2.68256	2.26556	1.13066	4.17828	1.75762	1.04592
TCGA-E2-A105-01	High	1.25221	3.16393	1.35716	0.939998	1.83356	1.29985	4.18722	2.17176	0.931387
TCGA-E2-A106-01	Low	1.00469	3.11748	0.71983	0.592806	0.739534	0.267516	2.3089	0.904239	0.39955
TCGA-E2-A107-01	Low	0.937392	5.14471	1.24785	1.13825	1.75368	0.683278	3.38094	1.48107	0.974861
TCGA-E2-A108-01	Low	0.909183	6.08268	4.49141	3.94561	4.81429	3.94977	5.95545	4.84478	4.95343
TCGA-E2-A109-01	Low	1.05098	3.74731	1.87843	1.84335	2.53893	2.12866	3.67464	2.59604	2.32836
TCGA-E2-A10A-01	High	1.39515	3.64798	0.463702	2.39401	2.34963	0.997513	4.87028	1.29524	0.810248
TCGA-E2-A10B-01	High	1.09818	4.5144	1.65246	2.06188	2.4404	1.59554	4.27566	2.71169	2.39588
TCGA-E2-A10C-01	Low	0.633017	4.38255	2.71612	1.90037	2.53122	3.07794	4.23519	3.59987	2.88878
TCGA-E2-A10E-01	High	1.11609	3.52258	1.53829	2.3833	2.73868	1.54986	4.40638	2.50359	1.91616
TCGA-E2-A10F-01	Low	0.957955	4.69202	2.0108	3.68293	3.39837	1.70757	5.50662	2.31976	2.3838
TCGA-E2-A14N-01	Low	0.596282	3.68203	1.65056	2.81673	3.77892	3.65073	3.89522	3.64897	3.32466
TCGA-E2-A14O-01	High	1.47231	2.80324	0.564182	0.932136	1.39552	0.944532	3.78818	1.74788	1.03453
TCGA-E2-A14P-01	High	1.37822	4.12043	2.3449	1.98325	2.0324	2.70418	3.38869	2.60193	2.91468
TCGA-E2-A14Q-01	Low	0.746521	4.52956	1.787	2.36892	2.12853	1.36499	3.07684	1.69192	1.88654
TCGA-E2-A14R-01	Low	0.721663	4.4497	2.45288	3.5217	3.47134	3.33056	4.68156	4.13204	2.8785
TCGA-E2-A14T-01	High	1.08019	3.69028	0.627651	1.2019	1.93908	0.715738	5.08697	1.6038	1.30472
TCGA-E2-A14U-01	Low	0.953863	5.39526	1.32877	1.78366	1.64858	1.18039	3.36118	1.50624	0.768193
TCGA-E2-A14V-01	High	1.45577	3.56535	0.523708	1.38332	1.76684	0.952451	3.17131	1.77482	1.01425
TCGA-E2-A14W-01	Low	0.915778	2.54068	0.122855	1.4042	1.67128	0.235448	3.29535	0.942852	0.187547
TCGA-E2-A14X-01	Low	1.07553	5.35672	2.80517	2.15634	3.44684	2.69344	3.5151	2.47444	3.50769
TCGA-E2-A14Y-01	Low	0.860689	4.29141	0.273424	2.11401	1.89658	1.77136	3.22131	1.63576	1.17644
TCGA-E2-A14Z-01	Low	0.794311	4.94953	3.32937	3.19011	3.64381	3.98421	5.16469	3.65427	3.91555
TCGA-E2-A150-01	High	1.20709	4.85705	1.77175	3.37273	3.877	3.26538	4.6063	2.93154	3.13178
TCGA-E2-A152-01	High	1.51366	3.49465	0.852992	1.95038	3.06666	1.89459	4.8265	1.72708	1.55194
TCGA-E2-A153-01	High	1.19482	4.93256	0.518838	2.44743	3.20995	1.00505	4.83692	1.1139	0.5031
TCGA-E2-A154-01	High	1.31548	3.47328	0.070996	1.21651	1.94132	0.3805	3.94565	1.49285	0.316255
TCGA-E2-A155-01	High	1.53532	2.57546	0.733245	1.39687	1.35287	0.682984	2.76503	0.802875	1.17301
TCGA-E2-A156-01	High	1.3421	3.52228	0.225365	2.75326	0.987203	0	3.6558	0.664286	0.0822665
TCGA-E2-A158-01	High	1.14087	3.64165	0.948889	2.66594	3.44947	1.74429	2.24487	1.81148	1.35655
TCGA-E2-A159-01	Low	0.934848	4.98397	3.98649	3.56382	4.58237	4.2168	5.28255	4.40272	3.73625
TCGA-E2-A15A-01	Low	0.99728	4.11128	2.58017	2.61861	3.64597	1.96994	4.62831	2.87808	2.61873
TCGA-E2-A15A-06	Low	0.917538	4.92616	3.17508	2.82211	3.53638	3.19609	4.27476	2.65979	3.61958
TCGA-E2-A15C-01	Low	0.980676	4.34139	1.30644	3.25162	2.5549	1.28062	3.81084	1.642	1.80794
TCGA-E2-A15D-01	Low	0.751837	4.38723	1.86254	1.81332	2.07213	1.26432	3.86371	1.61681	1.45021
TCGA-E2-A15E-01	High	1.1939	4.10311	0.600837	1.7396	2.11261	0.907451	3.71946	1.383	0.670544
TCGA-E2-A15E-06	Low	0.929173	3.85906	1.12651	1.07529	1.72584	1.85207	3.90389	1.06447	1.97711
TCGA-E2-A15F-01	Low	1.00285	4.37311	1.60528	2.81277	2.43893	1.1222	4.40632	1.87534	1.83504
TCGA-E2-A15G-01	Low	0.958455	4.41591	0.484492	1.95429	1.10399	0.234958	3.96926	1.00883	0.759212
TCGA-E2-A15H-01	High	1.14105	3.27789	1.04588	1.34809	2.00893	1.04377	3.46976	1.22737	0.753783
TCGA-E2-A15I-01	Low	1.00169	4.43597	2.22862	2.52185	2.84382	2.76186	4.19447	3.03086	3.28647
TCGA-E2-A15J-01	High	1.12696	2.90651	0.635654	1.19564	1.53217	0.508099	3.70838	0.783173	0.239825
TCGA-E2-A15K-01	Low	0.888152	4.60799	2.53711	2.46708	2.78849	2.64398	4.32569	4.01387	3.46525
TCGA-E2-A15K-06	High	1.14465	3.74881	0.407208	1.01833	0.571281	0.482806	3.69615	2.281	0.279524
TCGA-E2-A15L-01	High	1.51619	3.38364	0.400717	1.77482	1.65369	1.32222	4.36757	0.413823	0.530546
TCGA-E2-A15M-01	High	1.2955	5.16707	2.26053	3.24639	4.22106	3.50044	5.73812	2.88282	4.20779
TCGA-E2-A15O-01	High	1.13155	3.49	2.12627	2.27698	1.85516	2.13748	3.80949	3.08731	1.78984
TCGA-E2-A15P-01	High	1.29089	4.05792	0.981452	2.4402	2.35228	1.18719	3.71823	1.3777	1.4589
TCGA-E2-A15R-01	High	1.38602	2.90455	0.557909	1.2408	1.55876	0.393817	3.11558	0.407734	0.241316
TCGA-E2-A15S-01	Low	0.956329	3.297	0.330765	1.28919	1.03513	0.48512	2.91142	1.4557	0.30858
TCGA-E2-A15T-01	High	1.47526	3.26667	1.002	2.10163	1.48166	0.842421	3.26726	0.760158	0.988482
TCGA-E2-A1AZ-01	Low	0.983718	4.83328	2.79973	3.97469	4.07517	4.36773	4.98094	3.90125	4.25965
TCGA-E2-A1B0-01	Low	0.753293	4.0247	1.26587	3.07398	3.67195	2.69574	4.87725	2.37695	3.01078
TCGA-E2-A1B1-01	Low	1.07056	5.21436	2.0431	3.98459	4.32726	3.29697	5.47278	2.91301	3.71902
TCGA-E2-A1B4-01	Low	0.836202	3.40954	0.835668	2.39794	1.42176	1.4113	3.12823	0.917036	1.29424
TCGA-E2-A1B5-01	Low	0.706778	5.86445	3.61747	3.04977	3.49927	3.86081	4.48414	3.6829	4.92099
TCGA-E2-A1B6-01	Low	0.30112	5.65168	4.15516	3.09487	3.58701	5.19174	4.77535	5.81951	5.71722
TCGA-E2-A1BC-01	High	1.24355	4.22264	0.893166	2.13646	2.73777	1.19045	3.91205	0.91801	0.874261
TCGA-E2-A1BD-01	Low	0.756163	4.14805	0.618356	1.71012	1.88386	0.263159	3.2648	2.0248	0.527168
TCGA-E2-A1IE-01	High	1.12937	3.34876	0.474233	1.23993	0.875703	0.445945	2.83639	0.89646	0.56292
TCGA-E2-A1IF-01	Low	1.01967	4.89561	1.28138	1.23595	1.69511	1.00371	3.54143	2.03705	1.41085
TCGA-E2-A1IG-01	Low	1.06882	4.14404	0.856602	2.26146	2.75034	0.299822	4.43708	1.56053	0.567923
TCGA-E2-A1IH-01	Low	0.983663	5.01447	2.54968	3.04779	3.86866	3.5444	5.33372	2.81433	3.91639
TCGA-E2-A1II-01	Low	0.559549	4.94446	4.30869	4.58867	4.44937	4.62785	5.93273	6.15211	4.86912
TCGA-E2-A1IJ-01	Low	0.767392	5.38982	2.67598	2.31001	2.94971	2.72234	4.91541	2.24155	2.93834
TCGA-E2-A1IK-01	Low	0.793148	4.99151	1.85414	1.65306	1.95818	2.13166	4.10559	3.16993	2.28451
TCGA-E2-A1IL-01	Low	0.674669	4.36106	0.438333	2.02853	2.6667	0.490169	4.00211	1.24387	1.13555
TCGA-E2-A1IN-01	High	1.51782	3.76188	0.508935	1.91295	2.83565	1.14782	4.67494	1.40729	1.50999
TCGA-E2-A1IO-01	Low	1.03506	4.87522	3.23025	2.3619	3.0693	3.2552	3.95036	2.30838	3.17187
TCGA-E2-A1IU-01	Low	0.96671	4.52921	1.52115	1.80311	2.1546	1.12148	3.83646	1.38022	1.4444
TCGA-E2-A1L6-01	Low	0.751907	4.59405	0.971983	2.59845	2.48359	1.28583	4.35548	1.37879	1.05253
TCGA-E2-A1L7-01	Low	0.971762	4.58745	3.78293	3.29933	3.61917	3.60143	4.65798	3.981	3.8242
TCGA-E2-A1L8-01	Low	0.569797	4.04284	1.02503	2.57555	2.64621	1.98141	4.28452	2.28886	1.92282
TCGA-E2-A1L9-01	Low	1.04961	4.04633	0.775164	2.97047	3.2504	2.15235	5.53453	2.12909	1.96387
TCGA-E2-A1LA-01	Low	0.565846	4.23652	3.55157	3.079	3.7126	3.0213	4.80436	4.57901	3.65332
TCGA-E2-A1LB-01	High	1.41229	2.9562	0.741944	0.807143	1.66471	1.03072	3.8324	0.74148	0.776612
TCGA-E2-A1LE-01	Low	0.537617	5.19693	2.77032	1.54655	2.80748	2.3009	4.55682	3.10921	2.76827
TCGA-E2-A1LG-01	High	1.10579	5.63732	2.00199	2.58894	2.0049	1.79734	3.02348	1.8348	1.19982
TCGA-E2-A1LH-01	Low	0.194943	5.05596	3.65522	3.00849	3.50134	3.30643	4.7286	4.43958	3.98185
TCGA-E2-A1LI-01	Low	0.776795	4.64799	1.71436	2.34398	3.33289	2.31472	3.92446	3.35181	2.51726
TCGA-E2-A1LK-01	Low	0.717713	5.26353	0.318483	1.18344	1.98504	0.479346	3.8615	2.48894	0.646933
TCGA-E2-A1LL-01	High	1.22892	3.63449	0.81517	2.56561	1.99825	1.52161	2.87893	1.78305	0.925503
TCGA-E2-A1LS-01	Low	1.02265	2.87771	0.221102	0.705498	2.06963	0.411762	2.37259	0.812429	1.8792
TCGA-E2-A2P5-01	Low	1.01929	4.00508	2.21995	1.91937	1.99314	1.52237	3.36496	4.06379	1.94648
TCGA-E2-A2P6-01	Low	0.842728	4.20136	0.904671	1.85615	1.99729	0.986856	4.2127	2.59928	0.879476
TCGA-E2-A3DX-01	Low	0.814972	6.10239	4.00394	2.06832	3.69096	3.38688	3.95602	2.58714	3.58453
TCGA-E2-A56Z-01	Low	0.909004	3.30412	1.74352	1.1431	1.45628	1.91617	3.26813	2.02652	1.35329
TCGA-E2-A570-01	Low	1.00827	4.13553	1.12947	2.65994	2.32509	1.69477	3.87443	1.26295	1.01648
TCGA-E2-A572-01	Low	0.981407	3.60002	0.647644	0.858661	0.539194	0.162143	2.444	1.94367	0.434993
TCGA-E2-A573-01	Low	0.414099	5.01542	3.71175	3.1781	3.53178	3.43524	4.39489	4.41429	3.5534
TCGA-E2-A574-01	High	1.29563	2.67383	0.043543	0.250017	0.551516	1.21031	1.45255	1.4078	0.10359
TCGA-E2-A576-01	High	1.5188	3.74152	1.60696	1.2336	1.15601	1.70198	2.92957	3.70269	1.11497
TCGA-E2-A9RU-01	High	1.60234	3.46601	1.86637	1.7025	2.87193	1.64135	4.18495	3.71074	0.680079
TCGA-E9-A1N3-01	High	1.25502	2.97487	0.256036	1.67095	1.06426	0.221543	3.34011	0.72463	0.355266
TCGA-E9-A1N4-01	High	1.15836	4.24662	2.28628	3.28278	3.72274	1.30758	5.86674	1.98046	1.95841
TCGA-E9-A1N5-01	Low	0.904482	4.9354	2.51692	2.54462	3.30942	1.87543	4.75424	3.6449	2.68443
TCGA-E9-A1N6-01	High	1.78432	3.72524	1.09461	1.85983	3.29043	1.74493	4.6187	1.61092	1.64255
TCGA-E9-A1N8-01	High	1.35856	2.92005	1.59949	2.04772	2.7316	0.910942	2.72621	2.04067	1.07243
TCGA-E9-A1N9-01	High	1.2546	3.87049	1.78173	1.75283	2.53684	2.12996	3.38341	1.84503	2.51928
TCGA-E9-A1NA-01	High	1.8792	3.52819	1.12133	2.41871	3.70831	2.77837	5.49949	2.08191	2.15495
TCGA-E9-A1NC-01	Low	0.66919	5.71799	2.8668	2.65899	3.27328	3.07345	4.24606	3.38083	2.7878
TCGA-E9-A1ND-01	Low	0.454556	5.36328	4.44965	4.00994	4.26953	4.24601	5.52478	5.91596	3.71998
TCGA-E9-A1NE-01	Low	0.972938	5.32363	3.85694	3.99629	4.49887	4.03358	5.18452	4.13261	4.86749
TCGA-E9-A1NF-01	High	1.62963	4.60329	1.08374	2.23166	4.07064	2.1052	4.59546	2.42121	2.02143
TCGA-E9-A1NG-01	High	1.66961	5.4054	0.711443	3.19952	4.09406	1.30143	5.35154	1.71433	1.91467
TCGA-E9-A1NH-01	Low	0.782531	4.41744	1.27863	2.70611	2.36782	0.909445	4.60482	1.58593	1.26153
TCGA-E9-A1NI-01	High	1.57728	3.50661	0.821645	1.54998	2.92168	1.20503	4.22971	2.21835	1.1821
TCGA-E9-A1QZ-01	Low	0.647283	5.62142	2.37471	2.67982	3.4021	3.1803	4.86489	2.82122	4.01894
TCGA-E9-A1R0-01	Low	0.598019	5.20814	1.94746	2.2673	2.83662	1.84	3.83348	1.60923	2.63468
TCGA-E9-A1R2-01	Low	0.595439	3.92684	3.90669	2.22785	2.66291	2.32979	4.17496	2.2564	2.82471
TCGA-E9-A1R3-01	High	1.33533	4.59783	0.536935	2.47064	3.30567	1.49677	4.46258	3.10444	1.3496
TCGA-E9-A1R4-01	Low	0.938133	4.79208	3.33441	3.73374	4.46954	3.69159	5.50942	3.76847	3.37536
TCGA-E9-A1R5-01	High	1.27714	3.32084	0.3664	1.25622	2.40019	1.21003	3.81624	0.736989	1.18338
TCGA-E9-A1R6-01	High	1.23846	3.68241	0.856796	1.544	2.30865	1.77659	3.92573	1.2798	1.38521
TCGA-E9-A1R7-01	High	1.42154	2.87125	0.416552	0.968627	1.33873	0.800535	2.36003	0.574184	0.858563
TCGA-E9-A1RA-01	Low	0.963318	4.19822	1.39301	1.79251	1.74072	1.11849	4.39461	2.05526	1.78486
TCGA-E9-A1RB-01	High	1.31649	3.74763	0.680038	1.53431	2.20701	1.60484	4.1753	1.75819	1.25059
TCGA-E9-A1RC-01	High	1.77542	3.06047	0.22981	1.09931	1.22964	0.0350592	3.49768	1.36174	0.107093
TCGA-E9-A1RD-01	High	1.08052	3.92364	0.402778	2.26274	2.33061	1.36793	4.3445	1.96838	0.840778
TCGA-E9-A1RE-01	High	1.31962	3.03516	0.928692	1.15699	1.66103	1.34506	3.21618	1.26985	1.61525
TCGA-E9-A1RF-01	Low	0.976266	3.85894	2.29549	3.26138	3.86354	3.35529	5.0248	3.17261	2.70985
TCGA-E9-A1RG-01	High	1.25387	4.16771	1.79364	1.3664	1.97094	1.81819	3.97188	2.25759	1.62956
TCGA-E9-A1RH-01	High	1.31373	3.77628	0.81074	1.9153	2.71394	1.32421	3.72555	1.4305	0.86598
TCGA-E9-A1RI-01	High	1.25033	4.00633	0.937717	2.45943	2.56316	1.59201	4.71689	1.65081	1.78838
TCGA-E9-A226-01	High	1.80646	3.62364	0.694443	2.93011	3.18307	3.08324	4.62938	1.87697	1.88058
TCGA-E9-A227-01	Low	0.634457	4.78959	2.09574	2.30762	3.1126	2.70986	4.31252	2.73819	2.48378
TCGA-E9-A228-01	High	1.17802	3.93956	0.714457	1.33645	1.94125	0.309926	4.93639	0.828479	0.384972
TCGA-E9-A229-01	High	1.22467	4.13439	2.0106	2.42816	3.874	2.30634	5.21152	2.42258	2.847
TCGA-E9-A22A-01	Low	0.773868	4.91699	2.01416	2.96239	4.17176	2.87693	5.15008	3.72118	3.28453
TCGA-E9-A22B-01	High	1.19925	4.00285	0.854423	2.02845	3.28653	1.42602	4.48453	2.00787	1.31098
TCGA-E9-A22D-01	Low	0.59277	4.79033	4.76873	5.651	4.04392	3.90307	5.46803	6.02226	4.83981
TCGA-E9-A22E-01	Low	0.95662	4.91555	1.79434	2.60789	3.77617	2.30742	4.55116	3.09514	3.00422
TCGA-E9-A22G-01	Low	0.7723	2.63713	0.97095	2.45782	3.19428	1.84747	2.88561	2.60692	1.85213
TCGA-E9-A22H-01	Low	0.88996	3.80139	0.976648	3.80352	2.6507	2.15052	4.55595	2.25088	2.10687
TCGA-E9-A243-01	Low	0.990418	4.89082	3.12955	3.99086	5.05025	3.87607	5.87278	3.96748	4.5667
TCGA-E9-A244-01	High	1.23033	3.44755	0.797746	1.47887	2.77964	1.65734	3.60891	2.95487	1.5352
TCGA-E9-A245-01	High	1.19756	3.7021	0.966314	1.27383	1.41026	1.00287	3.54356	1.61013	0.825744
TCGA-E9-A247-01	High	1.29463	3.42995	0.707382	1.94336	2.12745	1.38889	3.50486	2.48699	0.771179
TCGA-E9-A248-01	High	1.11826	4.67751	3.2517	4.15054	4.2147	3.48292	4.86782	3.97014	4.05617
TCGA-E9-A249-01	Low	0.938411	3.16412	0.965048	3.43632	1.67576	1.523	4.12587	1.76209	1.43997
TCGA-E9-A24A-01	High	1.24793	5.10493	0.986904	2.65841	3.74928	1.7919	5.56278	1.7515	1.85723
TCGA-E9-A295-01	High	1.36721	4.72898	2.00708	1.70678	2.32488	1.32513	3.05517	2.75049	2.08709
TCGA-E9-A2JS-01	High	1.34895	3.56517	1.20549	2.25727	2.60378	2.08955	4.24115	2.62592	1.73262
TCGA-E9-A2JT-01	Low	0.309549	6.34164	5.70392	3.63479	4.02765	4.45397	4.54104	4.44113	5.54075
TCGA-E9-A3HO-01	Low	0.566238	4.16362	2.57931	2.28402	2.2669	2.06056	3.17749	3.43429	2.73317
TCGA-E9-A3Q9-01	Low	0.928206	4.64996	1.06889	1.38969	1.92441	1.03802	4.16362	1.98248	1.08508
TCGA-E9-A3QA-01	Low	0.471038	5.24224	3.92415	4.75587	5.19438	4.62301	4.74347	4.61702	3.99272
TCGA-E9-A3X8-01	Low	0.788721	4.82709	3.01975	0.985561	1.63737	2.12691	3.44714	3.19112	2.58217
TCGA-E9-A54X-01	High	1.15703	2.41158	0.288191	0.563539	0.396408	0	2.44576	1.65138	0.0436187
TCGA-E9-A54Y-01	High	1.08554	1.65309	1.00153	0.655539	0.922785	0.656739	2.9969	2.69283	0.401689
TCGA-E9-A5FK-01	Low	0.64936	6.00196	4.43952	2.61481	2.96623	3.36696	4.01621	4.241	3.83546
TCGA-E9-A5FL-01	High	1.36621	4.1494	0.99895	1.40291	1.54989	1.5615	3.51787	2.38609	1.75296
TCGA-E9-A5UO-01	Low	0.858165	3.51861	0.216461	1.56445	0.658825	0	2.02101	1.04532	0.0201229
TCGA-E9-A5UP-01	High	1.36903	3.70964	0.9005	1.82963	1.44654	0.737978	3.93925	2.08509	0.774843
TCGA-E9-A6HE-01	High	1.26392	4.50243	1.36931	1.55523	1.56184	1.44101	4.50341	2.26184	0.683854
TCGA-EW-A1IW-01	High	1.51932	4.66709	1.92452	1.98074	2.9901	1.73657	4.19509	1.58909	2.45881
TCGA-EW-A1IX-01	Low	0.638176	4.85649	1.17889	2.58796	2.93476	2.07904	4.52895	2.07542	1.45518
TCGA-EW-A1IY-01	Low	0.889084	4.10333	2.01951	4.11616	4.21623	3.69947	5.04871	3.14448	3.88011
TCGA-EW-A1IZ-01	Low	0.164722	5.30454	5.32359	2.85061	3.89089	4.08828	4.92553	5.2856	4.91054
TCGA-EW-A1J1-01	Low	0.877526	3.69538	2.29928	3.23449	3.18186	2.44384	4.35884	3.2727	2.96787
TCGA-EW-A1J2-01	Low	0.998568	5.1071	2.20324	2.98567	3.35842	2.35906	5.44716	2.08295	1.97069
TCGA-EW-A1J3-01	High	1.25814	3.06535	1.16693	2.97008	2.14372	1.82487	4.57122	2.00544	1.03539
TCGA-EW-A1J5-01	Low	0.886777	4.9368	3.16716	3.52888	4.22231	4.22679	5.55104	4.75882	4.23526
TCGA-EW-A1J6-01	Low	0.652019	3.59196	2.11595	2.71023	3.42339	3.67429	4.94172	4.03003	3.40287
TCGA-EW-A1OV-01	Low	0.657902	5.61653	4.63453	3.63788	4.45375	3.70488	4.66296	4.57804	4.74271
TCGA-EW-A1OW-01	Low	1.0155	4.1759	2.41895	2.58326	4.46122	2.08414	4.21329	2.52328	2.39422
TCGA-EW-A1OX-01	Low	0.964668	2.79935	0	0.796961	0.55168	0.0611565	1.97972	1.37411	0.0844528
TCGA-EW-A1OY-01	High	1.3602	3.58392	0.966254	1.51182	1.862	1.40204	4.06665	2.2746	1.3246
TCGA-EW-A1OZ-01	High	1.31308	3.86165	1.60576	1.46337	2.97385	2.81916	4.75467	2.50257	2.1281
TCGA-EW-A1P0-01	High	1.19814	3.52731	1.69277	1.90095	2.33099	1.87646	4.36318	2.31756	2.52169
TCGA-EW-A1P1-01	High	1.13017	5.74456	2.32512	3.05511	3.87287	2.54076	5.0473	2.53951	3.32775
TCGA-EW-A1P3-01	Low	0.946659	4.31486	1.95409	1.4204	1.52827	1.41801	3.77056	1.7021	1.33905
TCGA-EW-A1P4-01	Low	0.669031	4.96232	3.87731	3.46307	3.77691	3.01581	4.58517	3.76893	3.50421
TCGA-EW-A1P5-01	High	1.41494	4.58892	1.71632	3.08537	3.24759	2.3575	4.97678	4.78824	2.10839
TCGA-EW-A1P6-01	High	1.28417	3.67556	0.719884	1.71352	2.28412	0.882641	3.57267	1.22823	1.14354
TCGA-EW-A1P7-01	Low	0.823605	6.02341	3.49787	3.5592	4.06781	3.47257	4.24412	3.32226	4.35745
TCGA-EW-A1P8-01	High	1.34026	5.23633	1.81378	1.8635	3.17222	2.45161	5.19853	3.16066	2.49705
TCGA-EW-A1PA-01	High	1.16277	4.23127	2.34349	2.04753	2.62227	2.16033	3.54377	2.19513	2.59403
TCGA-EW-A1PB-01	Low	0.558489	6.26527	5.37526	6.24687	4.98323	3.02855	5.71013	7.00404	2.95499
TCGA-EW-A1PC-01	High	1.69099	4.3567	0.761171	3.11345	2.03076	1.58115	3.09256	3.07903	1.61588
TCGA-EW-A1PD-01	High	1.35452	4.11852	0.803953	1.26747	2.01716	0.474662	4.28503	1.532	0.725386
TCGA-EW-A1PE-01	Low	0.86728	4.44849	1.83281	4.17227	4.22038	2.74004	5.11708	4.89783	2.36016
TCGA-EW-A1PF-01	Low	0.871597	4.69647	1.75768	2.14665	2.92057	1.86795	4.32253	1.76026	2.31876
TCGA-EW-A1PG-01	High	1.22165	4.50727	0.516104	4.5353	3.42697	0.762915	4.10125	1.13097	0.804345
TCGA-EW-A1PH-01	High	1.24358	3.77871	1.99946	2.76425	3.20139	2.33494	3.45919	3.05672	2.17631
TCGA-EW-A2FR-01	High	1.23481	4.06115	1.51284	2.37254	3.80245	2.2237	4.75648	1.93943	2.21216
TCGA-EW-A2FS-01	Low	0.637217	4.2855	2.62349	1.78937	2.30586	2.55361	3.31635	2.6285	2.50628
TCGA-EW-A2FV-01	Low	0.745394	4.87577	2.0127	2.61644	3.27942	2.32733	4.15934	2.51378	2.88591
TCGA-EW-A2FW-01	High	1.16072	3.55685	0.640875	0.746046	1.69373	0.298233	3.27292	1.32309	0.838223
TCGA-EW-A3E8-01	Low	0.638494	5.31478	3.80251	2.93353	3.47433	3.86739	4.76197	3.26479	3.79528
TCGA-EW-A3U0-01	Low	0.840173	5.7012	4.55279	3.86517	4.34078	4.31197	5.39743	5.06581	4.33075
TCGA-EW-A423-01	Low	0.865473	4.72691	1.50144	1.10248	1.86127	1.35694	4.33124	3.1319	1.35428
TCGA-EW-A424-01	Low	0.868085	4.26365	0.926618	1.43024	1.4654	0.562869	2.84701	2.78668	0.221683
TCGA-EW-A6S9-01	High	1.49654	3.46374	1.04033	2.64407	2.79347	1.29211	4.31881	2.2811	1.10939
TCGA-EW-A6SA-01	High	1.16754	2.25953	0.204321	0.427064	0.574914	0.125688	1.86983	0.56962	0.301401
TCGA-EW-A6SB-01	Low	0.397944	5.14891	4.39933	2.14541	2.97752	3.68913	3.83728	5.17061	3.68359
TCGA-EW-A6SC-01	High	1.9252	4.53242	1.84907	1.90288	2.32723	1.73121	4.41233	2.68449	1.44599
TCGA-EW-A6SD-01	Low	0.653298	4.13446	2.87049	2.64059	3.23837	2.5951	4.64465	3.47683	2.48137
TCGA-GI-A2C8-01	High	1.19474	5.1185	1.02597	2.54641	3.10121	1.28766	4.97559	1.88664	2.03057
TCGA-GI-A2C9-01	High	1.49489	3.83078	1.20662	2.54904	3.40199	1.96784	4.33528	2.65109	1.41004
TCGA-GM-A2D9-01	Low	0.670495	4.40516	1.97282	1.50416	1.55336	1.03573	3.78089	2.53001	1.25145
TCGA-GM-A2DA-01	Low	0.326309	4.69139	3.20282	2.45999	3.01696	3.71607	3.94348	3.95765	3.23582
TCGA-GM-A2DB-01	High	1.11405	3.94728	2.59587	1.84658	2.03692	2.75158	3.73676	2.56472	2.7208
TCGA-GM-A2DC-01	Low	0.968824	3.10077	0.912916	1.75638	1.62711	1.02553	3.19652	1.64133	1.18885
TCGA-GM-A2DD-01	Low	0.534769	5.31703	3.04565	2.97588	3.55586	4.39903	4.84374	3.84989	3.75979
TCGA-GM-A2DF-01	Low	0.955368	5.02192	2.73323	2.08016	3.40527	2.95608	4.39077	2.66158	2.39845
TCGA-GM-A2DH-01	Low	1.0411	4.59454	3.3263	4.42838	3.81873	4.70772	4.64545	4.11257	4.6201
TCGA-GM-A2DI-01	Low	0.837643	6.29158	4.63309	3.75404	4.30349	4.06208	5.32571	3.73645	4.75606
TCGA-GM-A2DK-01	Low	1.01341	5.25885	1.90617	1.51534	2.72569	2.22648	4.5768	1.67796	1.53304
TCGA-GM-A2DL-01	Low	1.02541	4.19501	0.807405	2.26169	3.24678	1.88787	5.12621	1.7251	1.34085
TCGA-GM-A2DM-01	Low	0.974567	4.39933	0.827019	1.60808	2.27938	0.633481	4.88625	1.15305	0.811259
TCGA-GM-A2DN-01	Low	0.485044	5.56174	3.55599	3.21078	3.1829	3.37706	4.45035	3.11447	3.27427
TCGA-GM-A2DO-01	Low	0.203164	5.79072	5.04257	3.96178	4.29547	4.62528	5.00613	5.26382	4.97514
TCGA-GM-A3NW-01	Low	1.00844	4.69715	2.07412	1.61813	2.36149	1.5465	3.7659	1.81766	1.43971
TCGA-GM-A3NY-01	Low	0.623116	3.56639	1.06188	1.40007	1.3112	1.44898	2.88834	2.30482	1.01123
TCGA-GM-A3XG-01	Low	0.83005	4.97337	0.979323	1.33058	1.93199	0.888586	2.68156	1.41683	0.555841
TCGA-GM-A3XL-01	Low	0.518574	4.33225	3.60816	2.91665	3.38584	3.77026	4.7926	4.58343	2.77144
TCGA-GM-A3XN-01	Low	0.746218	5.29855	2.53045	1.78382	2.46146	2.32176	4.61385	3.75329	2.1132
TCGA-GM-A4E0-01	Low	0.33438	6.91351	3.16846	2.55013	3.67296	2.48032	5.3711	2.79066	2.11081
TCGA-GM-A5PV-01	Low	0.868819	4.71578	1.59831	2.37627	1.8648	0.693251	3.74789	1.57212	0.948949
TCGA-GM-A5PX-01	Low	1.05542	5.10013	2.00708	2.16281	2.1076	1.60562	3.58349	1.35989	1.05171
TCGA-HN-A2NL-01	Low	0.987505	3.68745	2.54287	1.79492	2.20036	2.35676	3.13017	3.42363	2.98084
TCGA-HN-A2OB-01	Low	0.946738	5.33024	1.42765	1.96313	2.71765	2.44649	3.69968	1.17571	1.00554
TCGA-JL-A3YW-01	High	1.4078	4.87863	2.4164	3.6539	4.09044	3.82956	5.28972	3.21493	2.72605
TCGA-JL-A3YX-01	High	1.26175	3.68944	0.803806	1.28631	1.75727	0.563668	2.82736	2.122	0.363496
TCGA-LD-A66U-01	Low	0.724847	5.13624	3.70189	2.11569	2.16781	2.97318	3.46318	3.60822	2.85153
TCGA-LD-A74U-01	High	1.17761	5.28507	1.70573	2.20897	2.89227	1.39895	5.41291	2.59029	1.27391
TCGA-LD-A7W6-01	Low	0.548112	4.76773	2.15339	2.54898	2.79407	1.94621	3.52871	3.33062	2.02459
TCGA-LD-A9QF-01	Low	0.512304	6.0346	4.03644	3.4662	3.68914	4.5078	5.50095	3.86662	4.11963
TCGA-LL-A440-01	High	1.47522	6.21084	2.3003	2.61347	2.93412	2.92672	5.98109	2.12371	2.06078
TCGA-LL-A441-01	Low	0.737625	5.43464	4.7591	2.85895	3.32906	3.9345	4.04654	3.97537	4.36968
TCGA-LL-A442-01	High	1.12559	6.18073	0.383992	1.98385	1.38559	0.662505	4.99866	1.70049	0.255847
TCGA-LL-A50Y-01	Low	0.80498	4.65047	1.43387	1.51646	1.1972	1.54052	4.39728	1.40492	1.42398
TCGA-LL-A5YL-01	High	1.14303	4.43872	2.07308	1.27199	2.07923	1.44022	3.81106	2.49979	1.54524
TCGA-LL-A5YM-01	High	1.09236	3.75488	1.2586	1.07558	1.05317	0.395735	3.54991	1.7598	0.19258
TCGA-LL-A5YN-01	Low	0.624207	5.3607	4.39544	2.08561	2.81434	4.10973	4.41789	5.50678	4.10016
TCGA-LL-A5YO-01	Low	0.904645	5.61666	5.01998	3.24162	3.6422	4.52432	4.93837	4.80056	4.58783
TCGA-LL-A5YP-01	High	1.3279	5.14235	2.25082	2.2422	3.45213	2.33769	4.4538	2.07418	2.15331
TCGA-LL-A6FP-01	High	1.63279	3.02237	0.0993903	0.6441	0.467288	0.0338018	2.478	2.64296	0.069711
TCGA-LL-A6FQ-01	High	1.33684	3.44594	2.13406	0.579379	1.27136	0.720554	3.91158	2.00325	0.327555
TCGA-LL-A6FR-01	High	1.54239	4.42658	0.637244	0.421559	2.86141	0.352636	2.98287	1.19948	0.55564
TCGA-LL-A73Y-01	High	1.14435	5.27394	2.61953	2.60423	3.12168	4.31384	4.00273	2.16757	3.10824
TCGA-LL-A73Z-01	High	1.11117	5.41098	2.71237	2.56616	3.13045	2.74246	4.49176	3.41752	2.61201
TCGA-LL-A740-01	High	1.30291	3.94396	1.53837	1.69841	2.74323	2.32358	4.46298	1.22744	2.06938
TCGA-LL-A7SZ-01	High	1.19159	5.87217	3.43977	1.67096	2.35206	3.66885	4.31128	3.93211	2.43228
TCGA-LL-A7T0-01	High	1.32892	3.87868	2.56041	1.90549	2.00935	2.34783	3.93318	3.31527	2.23404
TCGA-LL-A8F5-01	High	1.19226	4.64012	2.86167	2.22351	2.29568	2.65678	3.41011	4.07068	2.09692
TCGA-LL-A9Q3-01	High	1.13524	4.1082	1.39645	1.093	2.26331	1.98294	4.13096	2.86852	1.67831
TCGA-LQ-A4E4-01	High	1.43561	4.50866	0.727266	1.45339	1.64079	0.435055	3.36894	2.8567	0.37574
TCGA-MS-A51U-01	Low	0.434994	4.90824	1.97157	2.6777	2.5561	2.07049	3.45012	2.19492	2.16176
TCGA-OK-A5Q2-01	Low	0.79237	5.61477	3.47258	2.113	2.58963	2.84056	3.81067	2.41257	2.96854
TCGA-OL-A5D6-01	Low	0.850709	4.2577	1.4364	0.895188	2.07367	2.11514	4.03653	1.36397	1.30352
TCGA-OL-A5D7-01	Low	0.629791	4.38663	4.72213	2.80876	2.91921	4.03031	4.78392	5.92563	3.90865
TCGA-OL-A5D8-01	Low	0.959995	3.59878	2.42057	2.51025	2.31035	2.56383	3.47008	2.49143	2.33423
TCGA-OL-A5DA-01	Low	0.877508	3.9351	2.52425	2.26094	2.6943	1.48921	4.06291	3.28932	2.25952
TCGA-OL-A5RU-01	Low	1.03522	5.41501	3.25062	2.09712	3.06989	2.93153	3.59726	2.27271	3.55378
TCGA-OL-A5RV-01	Low	0.791229	5.06993	1.7803	1.515	1.91724	1.41929	3.54666	1.25942	0.837399
TCGA-OL-A5RW-01	High	1.65187	4.6752	1.34386	2.84996	2.57293	1.92417	4.13781	4.12194	0.927285
TCGA-OL-A5RX-01	Low	0.644031	5.01973	1.99641	2.22416	2.27761	1.37306	3.32443	2.02191	1.65926
TCGA-OL-A5RY-01	Low	0.838612	5.94633	4.2825	1.97974	3.71562	3.62459	4.71049	2.42758	3.57547
TCGA-OL-A5RZ-01	High	1.18179	3.07838	0.985199	0.335863	0.673939	0.629488	3.05599	1.31661	0.574904
TCGA-OL-A5S0-01	High	1.26738	4.75655	2.67796	2.01748	3.0831	3.1399	3.88702	2.85821	2.79376
TCGA-OL-A66I-01	Low	0.334648	5.9137	5.1281	2.7159	4.26187	4.96505	6.15174	6.12671	4.51052
TCGA-OL-A66J-01	High	1.1128	4.93883	1.51566	1.98384	1.81205	1.05048	4.17108	2.50049	1.13108
TCGA-OL-A66K-01	Low	0.7056	4.37939	2.1269	4.28337	1.81333	0.559841	3.61489	1.43258	0.69493
TCGA-OL-A66L-01	Low	0.896258	5.70726	2.53683	1.3907	2.11348	2.05072	4.21207	3.215	1.59515
TCGA-OL-A66N-01	High	1.1494	5.48218	2.20945	1.50401	2.22361	1.54613	3.53701	2.14038	1.52474
TCGA-OL-A66O-01	Low	0.960813	3.09612	0.946689	0.46933	1.10528	1.25534	2.17695	3.26418	0.793429
TCGA-OL-A66P-01	Low	0.612704	5.47249	4.50843	1.56076	2.90881	3.46818	4.65169	4.9438	3.23186
TCGA-OL-A6VO-01	High	1.22273	3.37921	1.43555	2.98893	2.42701	1.93084	3.97845	3.21696	1.75138
TCGA-OL-A6VQ-01	Low	0.922421	5.32946	2.10447	2.64376	2.70987	2.31879	4.11607	1.44868	1.73363
TCGA-OL-A6VR-01	Low	0.9558	4.16454	0.671224	1.66133	1.42735	0.591061	2.66586	0.816459	0.371538
TCGA-OL-A97C-01	High	2.50528	4.78696	3.43955	1.8532	2.11627	4.80548	3.71559	3.48529	2.50904
TCGA-PE-A5DC-01	Low	0.934993	4.47202	1.36806	1.58779	1.61862	0.992805	3.02362	2.80278	0.987484
TCGA-PE-A5DD-01	Low	0.66547	4.94734	2.49952	1.87447	1.90604	1.87626	3.71471	3.40593	2.12206
TCGA-PE-A5DE-01	Low	0.393212	5.66127	4.94751	3.70257	3.82872	3.6562	5.02442	4.85797	4.18661
TCGA-PL-A8LX-01	Low	0.987132	4.79271	0.49748	1.02733	1.4488	0.728511	4.4356	1.7005	0.409993
TCGA-PL-A8LY-01	Low	0.904523	5.68689	1.35502	1.13923	2.1103	0.587495	2.97742	2.02672	1.06859
TCGA-PL-A8LZ-01	Low	0.74529	5.42978	3.52466	4.78627	5.04966	4.15997	5.1689	6.04535	3.63933
TCGA-S3-A6ZF-01	Low	0.710227	4.12967	2.29335	2.47402	2.68308	2.857	4.66361	2.27976	2.5253
TCGA-S3-A6ZG-01	High	1.10885	3.89302	1.47796	2.39389	2.69157	1.56945	4.3426	2.42104	1.65658
TCGA-S3-A6ZH-01	High	1.49951	3.83331	1.51139	1.44391	1.87515	1.29785	3.43579	2.09877	1.3818
TCGA-S3-AA0Z-01	Low	0.815533	4.29459	2.92817	2.89485	2.88231	2.94293	4.49793	4.22063	2.84077
TCGA-S3-AA10-01	Low	0.709331	6.32778	4.582	4.25504	4.23722	4.73447	5.39055	5.56916	4.35118
TCGA-S3-AA11-01	High	1.23035	3.46521	1.08458	1.70348	1.43228	0.662745	3.61652	2.20376	0.857416
TCGA-S3-AA12-01	Low	0.711921	3.08814	0.885806	1.98233	1.80585	1.06629	3.53097	1.56871	1.14509
TCGA-S3-AA14-01	Low	0.821266	3.6007	1.50159	1.61991	2.18745	2.45619	3.4174	1.18077	0.757162
TCGA-S3-AA15-01	Low	0.905391	5.84569	3.46434	2.21215	3.31791	3.15276	4.42272	3.27409	2.80061
TCGA-S3-AA17-01	Low	0.865321	5.63146	4.2023	2.95513	4.44419	5.02851	5.24425	5.81152	4.5605
TCGA-UL-AAZ6-01	High	1.1774	3.29138	1.01206	1.72346	2.26042	0.902315	3.04137	3.2078	0.598573
TCGA-UU-A93S-01	Low	0.782506	3.54597	1.11156	2.75624	1.35411	1.53312	3.28363	3.42073	0.730535
TCGA-V7-A7HQ-01	High	1.38424	3.88851	0.62377	1.28028	1.5045	0.688208	3.42751	1.95182	0.364965
TCGA-W8-A86G-01	Low	0.903085	4.78398	0.685257	1.79006	1.75187	0.333228	3.05531	1.95753	0.380118
TCGA-WT-AB41-01	Low	0.33724	5.58454	3.80582	1.86698	2.84314	4.19739	4.37073	4.9206	3.29417
TCGA-WT-AB44-01	Low	1.02771	3.43497	1.09339	4.57991	2.71674	1.25204	4.40101	2.93854	0.545052
TCGA-XX-A899-01	Low	0.984257	5.82526	3.53835	2.59513	3.6172	3.50028	4.82122	2.73206	3.23895
TCGA-XX-A89A-01	Low	1.06896	5.89685	2.66644	2.41694	3.4885	3.37784	5.1396	2.46605	2.79796
TCGA-Z7-A8R5-01	Low	1.047	5.12561	1.76999	1.5275	2.04145	1.80304	4.57561	2.75422	1.58588
TCGA-Z7-A8R6-01	High	1.19937	3.24346	1.20886	1.94041	2.14628	1.74304	3.9281	3.25362	1.14656

## Sheet: HLA genes
ID	Risk group	Risk score	HLA-A	HLA-B	HLA-C	HLA-DMA	HLA-DMB	HLA-DOA	HLA-DOB	HLA-DPA1	HLA-DPB1	HLA-DOA1	HLA-DQA2	HLA-DQB1	HLA-DQB2	HLA-DRA	HLA-DRB1	HLA-DRB5	HLA-E	HLA-F	HLA-G
TCGA-3C-AAAU-01	High	1.17403	8.06358	9.76517	10.3074	5.01091	4.06214	3.78027	1.80309	6.4589	6.85272	4.8587	4.21451	5.54279	3.74169	9.30327	8.64844	7.79441	8.11563	4.95523	2.7851
TCGA-3C-AALI-01	Low	0.468119	10.8527	11.083	10.5686	6.49684	5.12064	5.20481	2.70203	7.47986	8.57945	6.71159	5.87598	6.10588	5.84027	10.9292	10.236	7.621	9.65131	6.32179	4.09618
TCGA-3C-AALJ-01	Low	0.640744	10.6398	10.8673	10.3209	6.35647	4.8257	4.6555	2.32964	7.63655	8.37076	6.13573	1.54648	7.4688	4.1111	10.9181	10.4832	9.04842	9.48413	6.76563	3.54865
TCGA-3C-AALK-01	Low	0.962816	9.83748	10.311	9.96476	6.38542	4.72349	4.74666	2.33327	7.37111	8.47214	6.31023	5.35759	6.32062	5.90476	10.7064	10.2993	6.9114	9.11978	5.65194	3.01449
TCGA-4H-AAAK-01	Low	0.999545	10.0208	10.6827	10.1139	6.27439	5.03902	4.96209	2.60757	7.76263	8.24203	5.85615	6.55454	6.40122	4.90273	10.8999	9.82302	8.43388	9.36155	5.38948	3.23296
TCGA-5L-AAT0-01	Low	1.04311	10.6205	11.085	10.6708	7.42754	5.90183	6.08653	3.58929	7.39067	9.54309	6.68258	7.35057	8.1189	7.19316	11.8225	10.9786	10.2291	9.97346	6.22125	4.67588
TCGA-5L-AAT1-01	High	1.16089	11.7381	12.2126	11.7156	8.65068	7.13965	6.62601	4.15761	9.14904	10.1732	8.14888	9.09886	7.8384	7.97804	12.9512	12.1064	10.1611	11.0552	7.23672	5.3745
TCGA-5T-A9QA-01	Low	0.893245	9.9565	10.5736	10.2706	5.5273	3.66257	2.72218	0.156514	5.14083	6.30031	4.27537	2.07492	6.0537	2.40719	8.94356	8.8138	5.86918	8.82512	5.97907	4.16732
TCGA-A1-A0SB-01	High	1.11859	8.3006	8.8975	9.11952	4.52606	3.28357	3.71822	2.94402	6.3081	6.74778	3.60832	3.97845	4.90092	2.64712	8.89771	7.85962	7.36933	8.57676	3.8245	2.08845
TCGA-A1-A0SD-01	High	1.18812	10.2545	11.0467	10.8999	6.06888	4.8957	4.62511	2.76189	7.57066	7.68778	5.49699	6.50142	5.99216	5.27756	10.5395	9.54157	7.50103	9.77	5.71938	4.14972
TCGA-A1-A0SE-01	Low	0.949774	9.02596	9.32986	9.39544	5.66508	4.09042	4.05068	2.23746	7.27078	7.78822	5.51881	4.11112	5.65648	4.41213	10.3222	9.34556	6.80936	9.04966	4.20866	2.12865
TCGA-A1-A0SF-01	Low	0.689922	10.0007	10.8917	10.5757	6.47629	4.63726	4.8679	3.19902	7.95472	8.83875	6.58247	2.17959	7.14473	3.77482	11.0325	10.1739	6.9595	9.91451	5.8047	2.25075
TCGA-A1-A0SG-01	Low	0.989504	9.08094	9.52399	9.137	6.21061	5.0267	5.22427	3.74575	7.18481	8.47901	5.77264	6.06179	6.37783	5.16285	10.9828	9.57545	9.18253	8.83961	4.38455	2.48228
TCGA-A1-A0SH-01	High	1.30214	9.29587	10.2052	10.1206	6.51329	4.95944	5.39403	1.95889	8.01595	8.41367	6.67829	5.13119	6.00774	5.31517	11.1406	10.2275	7.4644	9.11741	4.28219	2.32374
TCGA-A1-A0SI-01	Low	0.692746	10.8333	11.2931	11.1976	6.73433	5.38389	5.31695	2.90936	8.01389	8.53573	6.97715	2.58516	7.76749	4.117	11.2361	10.6483	7.9677	10.0395	6.26222	3.28462
TCGA-A1-A0SJ-01	Low	1.03818	9.65218	10.1347	10.3606	5.57834	3.68112	3.99005	2.25159	6.83313	7.1765	5.20801	3.41224	6.2026	2.28485	9.81535	9.02211	7.83393	9.61669	4.70379	2.10796
TCGA-A1-A0SK-01	High	1.73659	7.57097	8.36268	8.8052	3.477	2.40269	1.93959	0.673444	3.96998	5.17415	2.02475	4.12659	2.95387	2.26755	7.74201	5.94786	5.26535	6.84484	2.23221	0.969996
TCGA-A1-A0SM-01	High	1.18751	9.93019	10.6912	10.6583	6.43695	4.88831	5.15319	1.77059	7.90036	8.03727	6.16899	4.75418	6.87708	4.65674	10.8175	10.2576	9.07778	8.7661	5.10438	2.10583
TCGA-A1-A0SN-01	Low	0.844502	10.2395	10.6418	10.8142	6.77367	5.70059	5.82307	2.60593	8.42258	8.86984	7.62383	6.16894	6.68641	6.32687	11.5503	10.6698	8.20827	9.78065	5.77066	2.64427
TCGA-A1-A0SO-01	Low	0.886756	9.59871	8.27486	9.43394	5.02604	3.63369	3.79511	3.73931	6.25425	6.60494	5.10404	3.49681	5.51451	3.38732	9.42386	8.64498	7.40724	8.14379	4.44056	0.512894
TCGA-A1-A0SP-01	High	1.31409	10.115	10.2903	9.19939	6.386	4.99292	3.96953	2.84628	7.43412	8.29287	6.7606	7.38852	6.53375	6.42979	11.355	10.4866	8.54296	8.75802	5.14149	2.16809
TCGA-A1-A0SQ-01	Low	0.991057	8.50403	9.51175	9.61398	6.0187	4.66273	4.43731	1.20377	7.42985	7.54743	5.60527	4.93032	4.77792	4.61037	10.3475	9.63182	7.11825	8.62961	3.88394	2.82794
TCGA-A2-A04N-01	High	1.22818	9.56341	10.0834	9.91339	6.76733	5.08503	5.114	2.84621	7.95901	8.32568	6.64883	5.30022	7.14983	5.41738	11.1044	10.3951	7.67291	9.00085	4.74483	2.38743
TCGA-A2-A04P-01	Low	1.07796	10.7535	10.9	10.4981	6.52108	4.47791	4.19702	4.4108	6.71697	8.06487	6.09774	1.92954	6.89843	3.28902	10.4377	10.0109	8.81432	9.79471	6.43991	2.55016
TCGA-A2-A04Q-01	Low	0.270903	11.8381	12.5794	11.4684	8.36718	6.65333	5.63241	5.97235	9.43771	10.3509	8.49085	8.27814	8.98299	7.60766	13.2511	12.0194	9.71234	10.5645	7.86382	5.23804
TCGA-A2-A04R-01	High	1.14405	7.92012	8.85732	8.64618	4.30141	2.88476	2.47461	0.835326	5.19497	5.55367	3.34797	3.361	4.15646	1.75322	8.22059	7.13457	5.21938	7.70105	3.59391	1.10911
TCGA-A2-A04T-01	Low	0.841696	10.2992	10.5724	9.8182	6.42993	5.32799	5.09129	3.99108	7.81882	8.41494	6.58247	7.1195	6.15678	6.16739	11.5164	10.3738	8.62085	9.11657	5.87263	1.67001
TCGA-A2-A04U-01	High	1.14529	9.52107	9.18806	8.80055	4.95835	3.43085	2.42001	3.07806	5.97517	6.55113	4.55018	2.91276	5.23132	2.71655	9.08404	8.69547	7.43826	8.07859	4.32876	1.22623
TCGA-A2-A04V-01	High	1.12014	9.61368	10.1044	9.80467	5.8766	4.37058	3.69286	1.16337	7.1245	7.45498	5.8032	4.68656	5.88508	4.71357	10.2901	9.64489	7.19715	8.46547	4.88099	3.30761
TCGA-A2-A04W-01	Low	1.0562	8.74971	10.0789	9.8154	5.7186	4.09578	3.75361	1.62693	6.51325	7.41782	5.75842	4.81849	4.95824	4.40295	9.60734	9.24324	6.13184	8.53034	5.29247	1.99411
TCGA-A2-A04X-01	Low	0.47836	12.4295	12.9647	12.0174	7.22618	5.67871	4.79042	3.89173	8.08206	8.60046	6.88661	7.87387	6.20177	6.47416	11.3657	10.4597	7.86504	10.7964	8.06835	5.10512
TCGA-A2-A04Y-01	Low	0.787424	10.452	10.6372	9.91674	6.85254	5.62823	5.04581	2.16637	8.43127	8.6354	5.6071	7.73378	6.40946	5.81844	11.6191	9.96757	8.83496	9.52011	5.664	3.03034
TCGA-A2-A0CK-01	Low	0.612157	10.2953	10.8196	10.7057	7.06556	5.23811	5.27322	2.54208	8.17624	9.06981	6.51297	5.03557	6.57309	5.64114	11.215	10.5989	7.94317	9.62418	5.74505	2.6999
TCGA-A2-A0CL-01	Low	1.03817	11.2508	12.0253	11.3962	8.03804	6.86584	6.86258	5.29565	9.57529	9.77206	8.02649	8.45259	8.68902	6.06177	12.5127	11.5983	9.8681	10.8784	7.48151	3.76348
TCGA-A2-A0CM-01	Low	0.886901	11.1894	11.6941	11.2579	7.35106	5.55548	5.60682	3.63288	7.96724	8.95426	7.46121	6.63548	8.02938	5.67514	11.7688	11.0453	10.2541	10.2975	7.10384	2.83463
TCGA-A2-A0CO-01	High	1.25514	10.5949	11.474	11.1832	7.54676	5.87499	5.78728	4.14296	8.56974	9.18821	5.85347	7.9664	6.63492	6.53564	11.7013	10.3787	9.32643	10.6363	6.65628	4.09507
TCGA-A2-A0CP-01	Low	0.770566	9.75357	10.1954	9.83929	6.6334	4.51069	4.43528	2.43813	7.45095	8.20122	6.10559	6.21654	6.06981	5.41648	10.7784	10.1119	7.17185	9.49537	5.53241	2.92059
TCGA-A2-A0CQ-01	Low	0.6365	9.82777	10.215	9.67307	7.61833	5.42302	5.00152	2.52272	8.23157	9.54728	7.29951	7.16355	7.92324	6.21535	11.767	11.108	9.92066	8.73077	4.97578	3.48134
TCGA-A2-A0CR-01	Low	0.48123	11.9471	12.2997	11.3166	8.5164	6.07843	6.19646	5.21005	7.34624	10.4519	6.81592	9.54816	7.88873	7.33254	12.1587	11.3261	10.1985	10.8501	7.93592	4.778
TCGA-A2-A0CS-01	High	1.08605	10.0752	10.9274	11.4019	7.07238	5.14177	5.02426	2.31584	8.43164	8.45143	6.42801	7.55649	7.8589	9.01287	11.4229	10.6212	10.0741	8.89548	4.96287	2.15489
TCGA-A2-A0CT-01	High	1.28169	9.26933	9.89018	10.0288	5.80847	4.8629	4.18723	1.44142	6.69844	7.83126	5.17265	5.81409	5.74816	3.88743	10.4663	9.13013	7.52703	8.62909	4.21577	2.59052
TCGA-A2-A0CU-01	High	1.26148	9.01635	8.87735	8.49218	5.67797	4.32614	4.24812	1.82689	6.52189	7.87583	5.77866	4.56951	5.64908	3.8781	10.2596	9.48289	6.77271	8.78026	4.06653	1.72038
TCGA-A2-A0CV-01	Low	0.579884	9.58654	10.3668	10.1943	7.25978	5.92742	5.92374	2.88288	7.22036	9.18977	6.8952	7.36127	6.94241	4.99619	11.7803	10.099	8.81253	9.59147	5.53294	3.41487
TCGA-A2-A0CW-01	Low	0.968174	9.52921	11.599	11.5028	6.58372	5.17231	4.43736	3.1234	7.91983	8.25128	5.9299	6.68761	7.28014	4.82243	11.2444	10.1946	9.58805	9.77676	6.46398	0.338445
TCGA-A2-A0CX-01	Low	0.727229	10.5086	10.8102	10.5984	7.20206	5.37271	5.29069	1.96843	8.0729	8.53608	7.04358	2.15573	8.19405	3.71365	11.6288	11.0074	10.4858	9.44435	5.4631	2.19166
TCGA-A2-A0CY-01	Low	0.892147	8.50996	8.1909	8.21006	4.33547	1.84264	1.32779	0.580466	3.58589	5.11069	2.81209	2.49309	6.93516	1.53151	6.73814	6.94917	3.05384	7.62451	3.61281	0.936245
TCGA-A2-A0CZ-01	Low	0.789992	10.5706	11.2201	10.8913	6.66326	4.80309	5.03648	3.25573	7.86064	8.37419	6.61046	3.01272	7.80018	4.09558	10.9975	10.5649	9.34273	10.0005	5.59393	2.19195
TCGA-A2-A0D0-01	Low	0.745806	9.98071	10.5582	9.96437	7.08398	4.61922	5.11026	3.40917	6.87009	8.60298	7.22696	4.90175	7.75948	5.12045	11.4478	10.5787	10.6234	9.10149	5.61386	3.39213
TCGA-A2-A0D1-01	High	1.45069	8.61654	9.43284	9.02917	4.36358	2.89376	2.58226	1.76911	4.4279	5.84757	4.05499	2.89914	4.54009	2.62653	8.24101	8.02097	4.9312	7.81806	4.34477	2.95193
TCGA-A2-A0D2-01	Low	1.03817	10.0995	10.4864	10.1124	6.46865	4.90777	4.52346	3.64642	7.48096	8.36833	6.16037	6.80645	6.47596	5.85215	10.9305	9.97534	8.1201	9.29198	5.58589	1.97741
TCGA-A2-A0D3-01	Low	0.730724	9.86397	10.3963	10.0978	7.57226	5.66313	5.05111	3.74141	7.56752	8.35505	6.41851	7.59829	6.44837	5.80794	11.7004	10.4595	8.51529	9.22362	5.38297	3.44859
TCGA-A2-A0D4-01	High	1.34163	8.94127	8.99051	8.58395	5.2499	3.04995	2.46103	1.65211	5.20144	6.52977	3.39439	4.34675	2.91439	2.77332	8.6505	7.8951	6.18806	8.08398	3.9378	1.75723
TCGA-A2-A0EM-01	Low	0.990734	9.74819	10.992	11.1701	6.29748	4.83505	4.63663	1.67872	7.62839	8.81381	6.81797	5.59498	6.91288	5.66673	11.0225	10.3737	7.05116	8.69684	4.38323	2.23637
TCGA-A2-A0EN-01	Low	0.846538	10.7761	11.4743	11.1062	7.96659	6.53917	6.34213	3.72612	8.99018	10.0692	7.19148	7.72466	8.23846	7.32197	12.6676	11.2311	9.33548	10.535	6.83727	3.34109
TCGA-A2-A0EO-01	High	1.16315	10.2175	10.4618	9.73338	6.41739	4.98826	5.22582	2.82646	8.03335	8.32508	6.01852	6.40948	6.97882	5.38536	10.9954	10.0201	7.71791	9.57313	5.23188	3.63079
TCGA-A2-A0EP-01	High	1.4808	11.0211	11.7141	11.1125	8.7758	7.3012	6.87096	4.76348	9.53488	10.4687	8.48219	6.52873	9.26886	7.00826	13.0409	12.4596	11.3294	10.7785	7.02134	2.89506
TCGA-A2-A0EQ-01	Low	0.705896	11.1337	11.8221	11.3451	7.52478	6.12718	5.8836	4.30296	7.3057	9.50167	7.7087	3.94324	8.05088	2.42079	11.974	11.1959	9.1061	10.4943	6.60149	4.15911
TCGA-A2-A0ER-01	High	1.40949	9.70313	10.0772	9.9817	5.98416	4.4455	4.39517	1.45546	7.37323	7.39027	5.65039	1.53236	6.7801	2.59009	10.4362	9.82196	8.71393	8.45684	4.17535	3.70262
TCGA-A2-A0ES-01	Low	1.03297	9.04914	10.194	10.0008	6.72848	4.75843	5.79534	2.77051	8.02001	8.34829	5.74583	6.23349	6.66601	4.66403	11.0502	9.77982	9.20134	9.76109	5.48501	2.19997
TCGA-A2-A0ET-01	Low	0.975612	11.4655	11.6736	11.6102	5.74284	4.5288	3.9492	1.31717	7.28897	7.51029	5.84053	4.99994	5.6767	4.80893	10.4896	9.2792	7.51024	9.59949	5.95776	4.06363
TCGA-A2-A0EU-01	High	1.18442	9.09507	9.57337	9.12947	5.30843	4.10933	3.89439	1.16861	6.0879	7.16945	5.05493	5.6737	5.06926	3.33128	10.1015	8.7841	6.91662	8.50714	4.36766	2.52208
TCGA-A2-A0EV-01	High	1.08562	11.2531	11.7259	11.3542	6.75134	5.68848	5.48305	2.9012	8.29213	8.68554	7.52211	4.44924	8.17241	5.64999	11.5398	11.0728	9.84534	10.0717	6.72874	2.60995
TCGA-A2-A0EW-01	Low	0.944205	9.87108	10.6536	10.9738	7.10081	5.63181	5.96126	2.30251	8.82613	9.10759	6.44461	6.64385	6.97465	4.36676	11.8282	10.3853	8.7986	10.1904	5.09095	1.87854
TCGA-A2-A0EX-01	High	1.13228	9.69193	10.1949	9.61866	6.26524	4.59749	4.71077	3.01334	7.77063	8.38539	6.41154	2.78299	7.08357	3.75628	10.98	10.1079	7.51033	9.28826	4.70653	3.37779
TCGA-A2-A0EY-01	High	1.15843	9.33327	9.97246	10.8051	6.75022	5.43381	5.08507	2.39396	7.74469	8.40641	6.63189	7.12709	5.81953	6.28117	11.2723	10.2745	8.17521	9.10253	4.79926	2.32057
TCGA-A2-A0ST-01	Low	0.451379	12.2176	12.8687	11.8898	8.51443	6.9994	7.41343	6.52208	9.64783	10.3826	8.52345	9.39346	7.76292	9.57773	13.1222	12.1855	9.98408	11.2758	8.07289	4.7296
TCGA-A2-A0SU-01	High	1.1902	9.74401	10.7722	10.6972	6.66388	4.97251	4.56637	3.00803	7.48084	8.6721	6.52203	6.36222	6.5901	5.12197	11.1956	10.2965	7.54486	9.4773	5.13787	3.042
TCGA-A2-A0SV-01	High	1.4687	11.4804	12.1013	11.0483	7.23459	5.59769	3.95214	2.15251	7.69882	8.09499	6.71399	4.17315	8.00805	2.47808	11.0505	10.725	7.08277	9.94121	7.19407	3.16361
TCGA-A2-A0SW-01	Low	0.65069	10.4707	10.5549	10.8733	6.71457	5.34289	5.00435	3.96649	7.31545	8.63695	6.67093	7.37913	6.13644	5.78867	11.0631	10.0573	7.7916	9.68287	5.99413	3.94741
TCGA-A2-A0SX-01	Low	1.03969	11.0101	11.5462	10.9224	6.78944	5.77611	5.2509	4.19106	8.19735	8.50735	6.65562	7.43499	6.57721	5.81158	11.2909	10.2163	8.44929	10.0525	6.66307	3.89977
TCGA-A2-A0SY-01	Low	1.02874	9.32939	10.2633	10.1994	6.81318	5.51052	4.83939	3.16579	8.00587	8.34331	5.66356	5.71617	6.90281	4.08955	11.2946	10.1928	9.48385	9.61437	5.08207	2.53784
TCGA-A2-A0T0-01	High	1.11586	9.73242	10.64	9.20021	5.78043	4.02652	3.47821	2.46223	7.03546	7.63499	6.34294	4.75238	7.0491	4.95411	10.6895	10.1725	8.93481	9.00367	5.07713	3.05041
TCGA-A2-A0T1-01	Low	0.943241	10.6083	11.5469	10.9205	7.46019	6.15948	5.67928	3.72874	8.71272	9.20339	7.50854	7.44662	7.33497	6.45603	12.1985	11.1234	10.4104	10.0691	6.4455	2.90204
TCGA-A2-A0T2-01	Low	0.928601	9.64776	10.0167	9.76109	5.66249	3.78004	3.16315	1.77274	6.16525	7.00806	4.92488	5.36924	5.64116	2.83972	9.71916	9.12536	7.11198	9.9018	5.03366	2.47952
TCGA-A2-A0T3-01	High	1.39023	9.38699	9.88186	9.51591	4.73641	3.26326	3.56319	1.26726	5.8122	6.2044	4.40539	2.55468	4.82487	2.34222	8.88606	8.32539	7.15286	8.31497	4.50305	1.97332
TCGA-A2-A0T4-01	Low	1.07916	10.6037	11.1395	10.2322	7.07331	5.56816	4.88792	2.42571	8.3223	8.95718	7.19487	6.98439	6.55356	6.0619	11.608	10.7393	8.48513	9.89943	5.91971	3.51545
TCGA-A2-A0T5-01	High	1.15717	8.73667	9.80208	8.98078	6.00788	4.26982	4.55289	2.41953	7.26609	7.84358	4.89905	5.28848	5.90905	3.60476	10.3681	9.00741	8.55448	8.55935	4.9121	2.1371
TCGA-A2-A0T6-01	High	1.16627	9.94507	11.0966	10.3011	7.25353	5.9858	5.81081	3.49987	8.84379	9.20106	6.87879	7.36035	7.2459	6.15354	12.0576	10.6508	8.81518	9.91389	5.3936	3.38731
TCGA-A2-A0T7-01	High	1.14824	9.99683	11.1207	10.9192	6.7066	5.2244	5.13503	2.15303	7.53189	7.88787	6.13993	4.39134	7.06792	4.55538	10.8003	10.2817	9.23145	9.54172	5.84026	3.05971
TCGA-A2-A0YC-01	High	1.27454	10.1289	10.9658	10.6972	6.54558	5.17747	4.68249	2.15742	7.75903	8.14275	5.73712	6.67065	5.59269	6.3123	10.7902	9.63572	7.86557	9.21812	5.14568	1.81232
TCGA-A2-A0YD-01	Low	0.744011	10.4568	11.078	10.5004	7.59838	5.83605	5.52166	3.13945	8.07978	8.77912	7.09572	3.84405	8.40047	4.85886	11.7447	11.1026	10.0338	9.77619	5.98796	2.34963
TCGA-A2-A0YE-01	High	1.43303	10.4901	10.6741	11.4189	5.84788	3.45752	3.15765	4.03213	5.73814	6.49449	4.38258	5.33227	4.02428	3.61114	9.35996	7.94535	6.26001	9.55454	4.77906	2.27351
TCGA-A2-A0YF-01	High	1.3094	9.11024	9.37316	10.1586	7.32063	5.93085	5.72162	1.96283	8.76597	8.56351	7.51432	5.75493	6.2396	4.51181	11.7166	10.4816	6.97882	8.58121	3.54454	1.80574
TCGA-A2-A0YG-01	High	1.38416	9.88918	10.6954	10.7849	5.75515	4.67414	4.68204	2.27606	7.25064	7.33109	5.80603	4.11717	6.49797	3.98412	10.6627	9.51687	8.67181	9.04391	4.88518	1.86113
TCGA-A2-A0YH-01	High	1.31498	10.7652	11.6053	11.3892	7.27832	5.92552	5.76077	2.71085	8.49478	8.33419	6.76764	7.36241	7.43004	4.60709	11.534	10.6691	10.0952	9.69286	6.36826	3.29953
TCGA-A2-A0YI-01	Low	0.83834	10.0796	10.9507	10.9478	7.48771	6.56635	6.08181	3.74582	9.40369	9.43966	8.407	7.41456	5.80817	6.70792	12.3729	11.3235	7.98584	9.8112	5.54814	2.0061
TCGA-A2-A0YJ-01	Low	0.916849	9.23931	10.4611	9.83981	4.56674	2.56591	2.37003	3.95859	4.73826	5.76504	3.84512	4.43665	4.80926	4.43575	8.6409	7.81554	5.56388	9.21911	6.16533	4.37003
TCGA-A2-A0YK-01	Low	0.885163	10.5305	11.2991	10.9467	7.70064	6.09434	6.56718	4.68718	9.07343	9.41497	7.741	6.3095	7.1984	6.13208	12.2322	11.0886	8.92116	10.5261	6.13473	1.96508
TCGA-A2-A0YL-01	Low	0.876471	9.47326	10.4816	10.3832	6.74076	5.11491	5.69286	2.82569	7.91775	8.32082	6.61759	1.61459	7.43378	4.56861	10.9281	10.1434	9.06178	9.62779	5.20437	2.08694
TCGA-A2-A0YM-01	High	1.19763	10.9597	11.7151	10.1745	6.27314	5.05226	5.00172	4.14206	7.10649	7.84896	6.61933	6.9176	7.15055	5.49137	11.0051	9.89406	8.00495	9.20944	7.1086	2.96042
TCGA-A2-A0YT-01	High	1.55696	8.62782	10.1442	10.614	6.31408	4.7466	4.57378	1.39339	7.23415	7.25308	5.89572	5.67086	5.98989	3.68202	10.3914	9.27254	6.90221	9.1534	4.48817	0.753472
TCGA-A2-A1FV-01	High	1.19334	7.593	8.44926	8.46742	5.44941	3.88421	3.64257	0.805248	5.64452	6.46341	4.19369	4.66601	4.59338	3.89641	9.38269	7.68995	5.76214	8.27976	2.87797	1.56098
TCGA-A2-A1FW-01	High	1.16448	8.95474	10.0662	9.25973	5.61241	4.39522	4.07107	2.22445	6.81136	6.65501	4.15049	6.3462	4.57802	4.24323	10.0139	7.99292	7.2141	8.58444	4.49862	2.55922
TCGA-A2-A1FX-01	Low	1.02942	9.06052	10.2577	10.7964	6.69072	5.53738	5.30124	1.57506	7.89133	8.51302	5.63487	5.88343	6.34902	3.87085	11.1126	9.97853	8.11647	9.42714	5.10345	1.85107
TCGA-A2-A1FZ-01	High	1.32353	9.62769	10.3819	10.0977	7.11422	5.6977	5.55345	2.18694	7.9884	8.85211	6.82765	4.10311	7.74784	5.63509	11.476	10.7541	7.76685	9.62615	5.1865	2.89714
TCGA-A2-A1G0-01	Low	1.05425	9.42696	9.7879	9.48488	6.60583	5.29615	5.95231	3.59328	8.32556	8.33994	6.18103	6.70143	7.10413	6.26886	11.2146	9.89339	9.44113	9.37135	4.84375	1.96607
TCGA-A2-A1G1-01	Low	0.953931	10.9814	11.712	11.103	6.85254	5.60309	5.43766	4.36067	8.07001	7.69742	7.30105	5.95171	7.03132	4.57545	11.3235	10.1372	6.74745	9.44009	6.53856	4.06442
TCGA-A2-A1G4-01	High	1.33519	8.41375	8.84833	9.1177	5.62752	4.35492	4.25579	2.29374	6.40319	6.67305	4.86654	3.31333	5.44573	3.13344	9.68959	8.9896	7.80111	8.23605	3.71253	2.10546
TCGA-A2-A1G6-01	High	1.23349	9.28447	9.74392	9.63667	7.22005	5.37403	5.36955	2.9015	8.32166	8.19323	6.61154	5.0569	6.44655	4.79977	11.3126	9.99809	6.90121	9.57407	4.34275	2.21586
TCGA-A2-A259-01	High	1.44735	9.51708	10.1684	9.74509	6.47207	5.12833	5.55902	3.38604	7.56959	8.57178	5.57485	7.85798	6.00865	5.8238	11.4332	9.36595	8.7743	9.56601	5.08158	1.07807
TCGA-A2-A25A-01	Low	0.828715	10.0695	10.9064	10.0661	7.48695	5.90638	6.05476	3.00402	8.35455	9.24771	7.22876	2.11584	7.95655	4.86766	11.9642	11.1374	10.002	10.4141	5.61828	2.70157
TCGA-A2-A25B-01	High	1.4314	9.03641	9.82706	9.1977	5.89311	4.90361	5.10475	1.90455	7.54947	7.30856	6.7514	3.49418	6.82353	2.60825	10.6069	9.70996	7.05658	8.73493	4.31475	2.93869
TCGA-A2-A25C-01	Low	0.885427	10.1755	10.9825	11.5481	6.03528	4.79109	4.90233	2.79351	7.31018	7.50276	6.1284	4.90217	5.84039	4.12722	10.3674	9.58389	8.41907	9.60612	5.8753	2.8964
TCGA-A2-A25D-01	High	1.12321	10.8555	11.484	10.8319	7.56802	6.13615	5.61169	3.77637	8.06387	9.02583	7.47936	5.50261	6.83505	5.1759	12.0449	11.3679	7.95156	10.3446	6.36111	2.64765
TCGA-A2-A25E-01	High	1.12169	8.76697	9.63325	9.55694	6.1615	4.78826	4.53165	2.52885	6.78634	7.17188	6.07425	1.8018	6.82728	2.64125	10.2925	9.45924	8.26218	8.25644	4.19002	1.72378
TCGA-A2-A25F-01	Low	0.765108	11.3321	11.971	11.3532	8.50743	7.64001	7.33437	4.74188	9.96309	10.3275	8.78819	9.04942	8.47817	6.76555	13.4989	11.8275	10.3749	10.8839	7.00938	3.73628
TCGA-A2-A3KC-01	High	1.25494	9.76515	10.0517	10.3086	6.79901	5.54535	5.68387	2.77777	7.69172	8.91891	6.63543	5.13178	7.39032	5.42111	11.1221	10.5237	9.4995	9.73674	5.45481	2.45678
TCGA-A2-A3KD-01	High	1.25483	8.83069	9.77814	10.4726	5.79795	4.47012	4.42637	1.25125	6.98717	7.42606	4.76002	6.03489	4.96918	4.1316	10.0078	8.47299	7.47356	8.85071	4.27647	3.06583
TCGA-A2-A3XS-01	Low	1.06714	9.6285	10.4773	10.2169	6.46151	4.92339	4.83978	3.81163	6.82594	8.25699	5.61578	5.72879	6.06058	4.83537	10.5975	9.60463	7.5226	9.87593	6.39745	4.2586
TCGA-A2-A3XT-01	Low	0.816895	11.3112	11.7387	11.2318	7.49139	5.88817	5.77425	3.42849	8.14428	9.51214	7.31269	3.04728	8.34546	4.07393	11.902	11.5164	10.2282	9.74926	7.8541	4.69533
TCGA-A2-A3XU-01	High	1.30912	9.12032	8.86398	8.68358	4.41187	2.22241	1.565	2.86868	4.04673	5.59374	2.34149	2.60665	3.62883	1.9312	7.21892	6.92244	4.77075	7.59214	3.7359	1.85282
TCGA-A2-A3XV-01	High	1.26962	9.63529	9.52066	10.0229	5.74014	3.77658	3.28321	0.940748	5.47803	7.39786	3.9736	5.5195	4.62795	3.67498	8.63439	8.82544	6.15653	8.37998	4.57053	2.24099
TCGA-A2-A3XW-01	Low	0.276013	11.1278	11.2605	11.185	6.82241	5.00566	4.89402	2.09561	8.06006	9.09818	6.59697	6.47327	7.72513	7.07114	11.0196	10.504	8.14637	10.6342	6.59402	4.17415
TCGA-A2-A3XX-01	Low	1.05798	11.1186	11.227	11.2698	6.50189	4.72873	4.41089	3.53636	7.07789	7.91337	5.48452	5.18494	5.85538	5.38593	10.4431	9.94744	6.96817	9.77281	7.10098	4.75
TCGA-A2-A3XY-01	High	1.10078	10.8721	11.75	11.5124	6.84183	5.43344	4.89209	3.51707	7.97866	8.81501	6.73377	5.81302	5.968	6.00617	11.0586	10.688	7.65509	10.4578	7.29219	4.10553
TCGA-A2-A3XZ-01	Low	0.780912	10.7007	10.8675	11.0347	7.38122	6.08153	6.30803	4.97059	7.98616	9.4009	7.61548	2.85353	8.6732	3.59693	11.5762	10.952	8.51984	9.81515	6.41131	2.50048
TCGA-A2-A3Y0-01	Low	0.682087	10.4697	11.1029	10.4114	7.28272	5.10215	5.63444	3.81771	6.66806	8.76169	6.76466	6.1289	7.85339	5.1713	11.2517	10.8785	8.33783	9.93124	6.54444	4.57254
TCGA-A2-A4RW-01	High	1.54306	9.65056	10.4217	10.6196	6.67508	5.08315	4.88098	2.34059	6.5605	8.55492	6.28544	5.96631	5.52304	5.47483	10.6812	10.1727	7.40483	9.54305	5.42587	3.44597
TCGA-A2-A4RX-01	Low	0.900797	10.1598	10.5214	10.0764	6.38505	5.30419	5.18542	4.72021	6.8975	8.19252	6.6092	6.26929	7.18107	5.58945	10.7716	10.1819	8.99752	9.62763	6.21848	3.5241
TCGA-A2-A4RY-01	Low	0.728113	10.1558	10.3367	10.3956	6.97914	5.46443	5.87418	3.52436	7.53303	8.72241	6.60144	3.67536	7.6907	2.19245	11.0553	10.4669	7.92018	9.99519	5.99103	2.0754
TCGA-A2-A4S0-01	Low	0.966399	11.3365	11.3967	12.8368	5.73785	4.34155	4.36817	1.73065	6.95046	7.28022	4.98328	3.01211	5.60597	3.35631	9.69859	9.25108	8.05618	8.61193	5.70596	2.93719
TCGA-A2-A4S1-01	High	1.33969	9.32634	12.7395	12.1304	8.35438	6.66394	5.17518	2.05973	9.07206	10.0707	6.22073	6.79274	6.7202	6.19064	12.2236	11.536	9.8606	10.8505	7.52877	4.9374
TCGA-A2-A4S2-01	High	1.08872	11.739	12.3039	11.5864	7.26312	5.65887	4.34035	3.17934	7.72943	8.09536	6.19296	4.50877	7.24784	4.37079	10.9565	10.7204	8.0967	10.307	5.88504	5.33835
TCGA-A2-A4S3-01	Low	0.918816	10.2398	10.8771	11.1518	7.0904	5.56108	5.38177	2.77701	7.38809	8.82086	6.75213	5.69274	6.72647	6.05206	11.0601	10.635	7.72535	9.99298	5.84608	2.74212
TCGA-A7-A0CD-01	Low	0.768028	9.79985	9.54303	9.76699	5.2366	4.07288	3.58946	0.801385	6.42266	7.08074	4.60245	5.04997	4.8107	3.49401	9.94289	8.72059	7.20674	8.78618	5.42801	3.27484
TCGA-A7-A0CE-01	High	1.31136	10.345	10.9453	10.235	5.98853	3.41309	2.83403	4.34964	5.94441	6.62197	4.36255	3.36133	3.70544	3.42075	9.35444	8.84215	6.04142	9.00545	6.60899	2.91033
TCGA-A7-A0CG-01	Low	0.918589	10.2715	11.019	10.5315	6.99183	5.72929	5.8693	3.45438	8.40881	8.98125	6.62899	7.41077	6.13101	5.9841	11.7016	10.2412	8.26554	10.004	5.54254	0.582985
TCGA-A7-A0CH-01	High	1.15162	10.2742	10.7266	10.3381	5.44152	4.35848	4.2374	1.40761	6.92937	7.33711	5.21234	4.49159	5.34027	3.71822	9.98602	9.35277	6.86354	8.51031	5.04164	3.90585
TCGA-A7-A0CJ-01	High	1.11197	10.002	10.6612	10.4097	4.79434	3.5293	2.52568	1.2778	4.77406	5.89866	4.58203	1.659	5.29494	1.92914	8.69275	8.63353	7.41658	8.54232	4.90709	2.98473
TCGA-A7-A0D9-01	High	1.36533	8.2406	8.83452	8.58086	5.19282	3.74523	3.13608	0.98256	6.02495	6.63675	3.97242	4.62218	4.48956	3.00459	9.20457	7.78475	6.35763	8.46987	4.20951	1.61217
TCGA-A7-A0DA-01	High	1.08031	10.5168	11.4988	10.8069	5.36862	4.16376	3.42371	4.09007	6.31006	6.8326	3.9511	6.40587	4.77882	4.03024	9.57343	8.35748	7.47093	9.86274	6.27462	3.84614
TCGA-A7-A0DB-01	High	1.503	8.81425	9.69121	9.58278	6.2776	4.78924	3.84837	1.17745	6.88075	7.32285	5.22597	1.41423	6.22302	3.41483	10.3125	9.62961	8.80026	8.2573	3.96916	2.49055
TCGA-A7-A0DC-01	High	1.28357	4.82329	4.94791	4.40463	1.84211	1.42962	1.45986	0.177806	2.72876	3.40944	1.92836	0.705071	2.44291	0.199678	5.81542	5.16385	4.14303	5.29868	1.39015	0.217384
TCGA-A7-A13D-01	High	1.26346	8.89742	9.35332	8.368	3.65986	1.62631	0.824416	2.72017	3.12648	3.61907	1.73502	2.46672	2.29732	2.25301	6.44867	6.39604	4.31487	8.0657	4.42987	2.54683
TCGA-A7-A13E-01	Low	0.953689	9.85768	10.0975	9.46205	4.3251	3.84181	3.45487	2.47175	5.52206	6.32972	3.87262	5.07301	3.7683	2.75137	9.14865	7.1811	6.38817	8.74747	4.72179	2.90649
TCGA-A7-A13F-01	Low	0.832033	8.77563	8.55705	9.64912	6.57361	5.03288	5.38621	1.28211	7.51742	7.72223	5.45592	6.34345	5.11887	5.00796	10.6302	9.36504	7.36864	8.34954	3.78802	1.30142
TCGA-A7-A13G-01	Low	0.925783	7.07422	8.25423	8.66669	5.99182	4.60328	4.83575	2.03078	5.69261	7.331	4.86903	4.48361	4.14167	4.73737	9.7468	7.90681	5.96787	7.1381	3.98267	0.12
TCGA-A7-A13H-01	Low	0.701279	10.6423	11.6839	10.9455	7.90428	6.81633	6.57687	3.13912	8.51601	9.68033	8.15253	6.95374	8.84263	7.33559	12.4566	11.9467	10.7263	10.2916	6.66577	4.73864
TCGA-A7-A26E-01	High	1.52007	7.47069	9.05493	9.00808	5.70496	4.99227	5.49545	1.56538	7.26038	7.66801	5.5362	5.89659	4.30013	4.63935	10.6645	8.90182	6.84823	8.03672	3.41558	0.656784
TCGA-A7-A26F-01	Low	0.791141	8.10476	9.10008	8.40039	4.9856	4.09818	3.69937	2.16327	5.29083	6.34842	5.17499	0.106253	5.20092	0.628195	9.57721	8.24063	5.419	7.80427	4.70128	1.44242
TCGA-A7-A26G-01	Low	0.998086	9.7502	9.99329	9.23623	7.14853	5.80994	6.40898	3.63146	7.33323	8.71268	6.87523	6.84233	7.38914	5.57378	11.7668	10.1929	9.4556	9.03497	4.26321	1.7944
TCGA-A7-A26H-01	High	1.21547	9.36914	10.7475	10.1156	6.19767	5.37453	4.51237	1.90554	6.98288	7.85498	5.83932	5.60093	5.66166	4.37058	10.8897	9.48046	7.86394	8.84091	5.50189	3.17485
TCGA-A7-A26I-01	High	1.38731	7.86927	8.92842	8.515	5.27459	4.53531	3.77679	2.60202	6.0659	6.62735	5.06863	2.92203	4.81106	2.11628	9.53095	8.50507	7.66061	8.05172	4.2606	0.0956148
TCGA-A7-A26J-01	High	1.34595	9.35066	10.1759	9.91772	5.06522	4.42324	4.03811	1.6106	5.9475	6.41886	4.88806	3.31251	4.84613	2.75146	9.51224	8.5609	6.5907	8.36587	5.28739	0.731816
TCGA-A7-A2KD-01	Low	1.02859	9.95615	10.6224	10.0044	6.75377	5.49365	5.24396	2.53416	7.80151	8.35272	7.01866	5.37984	6.98672	4.866	11.2901	10.699	7.98363	9.29039	5.83676	2.99653
TCGA-A7-A3IY-01	High	1.51176	10.9951	11.2812	11.2156	7.43958	5.83903	5.77225	2.81646	8.2639	9.51592	7.21781	5.52988	7.86465	5.84524	11.9699	11.653	10.1936	9.82965	5.7775	0.400845
TCGA-A7-A3IZ-01	High	1.27119	8.54275	9.83652	10.3008	6.02301	5.01504	5.25211	1.09612	7.46167	7.91773	5.59438	5.79942	4.41533	5.58333	10.5298	9.16351	7.33242	8.02467	3.90666	2.07446
TCGA-A7-A3J0-01	Low	0.729802	10.975	11.6981	11.5099	6.7659	5.16275	6.61828	4.74808	7.38	8.76716	7.12577	4.42166	7.46794	4.83535	11.3388	10.6094	8.48337	9.23843	6.73003	7.80633
TCGA-A7-A3J1-01	Low	0.386157	10.9639	11.7489	11.2069	7.3222	6.16407	6.44877	3.80761	9.247	9.41107	7.60621	2.62583	8.63598	5.26361	11.9463	11.6572	11.2653	10.3439	6.55108	1.99694
TCGA-A7-A3RF-01	High	1.10641	10.6434	10.5749	10.709	4.77663	3.25756	3.16656	0.333496	4.75975	7.09269	4.43962	0.522011	5.81855	0.851309	8.92254	9.12755	8.41144	7.97588	5.1964	4.76417
TCGA-A7-A425-01	Low	1.04864	9.60095	10.1527	10.9563	7.24066	5.53633	5.09382	2.13115	8.01906	9.12041	6.17239	0.81688	8.04023	3.59408	11.0125	10.9976	10.4923	9.66767	5.38721	2.79184
TCGA-A7-A426-01	Low	0.717446	9.79829	10.4143	10.2458	6.84337	4.8871	4.84528	2.79042	7.08724	8.51422	5.4147	6.09423	6.89525	4.52749	10.6537	10.1206	9.49104	9.89738	5.80071	2.96735
TCGA-A7-A4SA-01	Low	0.813663	10.608	10.9103	10.5886	7.06014	5.82117	5.69867	3.41137	7.81377	9.09681	6.81689	2.77391	7.58958	5.57866	11.4668	10.6185	8.21148	10.1214	6.6611	2.51916
TCGA-A7-A4SB-01	Low	0.876813	9.85857	9.53576	9.57884	5.45747	3.89391	3.52525	1.35569	6.1144	7.26443	4.09815	6.53804	5.11865	3.5181	9.43995	8.45292	6.64986	9.14323	4.88147	1.8064
TCGA-A7-A4SC-01	Low	0.866565	9.66954	9.71387	9.89921	6.72994	5.18371	5.68656	2.61828	7.50714	8.59918	6.49224	5.8005	4.78527	5.53865	10.8988	10.2337	7.20654	9.3779	5.21488	0.91948
TCGA-A7-A4SD-01	Low	0.508193	11.329	12.1909	12.0836	7.32579	5.51279	5.56662	4.96391	7.55109	8.7881	7.38583	7.35206	8.01319	5.17984	11.683	11.0978	10.3701	9.93231	7.54786	5.42783
TCGA-A7-A4SE-01	High	1.40242	10.8325	10.9448	10.9409	5.69097	4.27686	3.76036	3.57035	5.44523	7.33932	5.92424	2.76919	6.17255	4.67462	9.71676	9.51283	8.30477	9.61556	7.08605	3.9337
TCGA-A7-A4SF-01	High	1.25264	9.09097	10.1322	10.0351	5.54057	4.57317	4.52511	1.86904	6.78232	7.45033	5.78844	4.48908	6.28362	4.21773	9.87442	9.42459	6.2712	8.65089	4.58549	3.04059
TCGA-A7-A56D-01	Low	1.04912	12.2118	12.6179	12.287	6.81025	4.6483	3.10723	2.05611	5.98711	8.31637	3.94513	5.34135	5.10337	4.50487	9.35529	10.2589	7.65593	10.0316	7.4931	4.65041
TCGA-A7-A5ZV-01	High	1.20664	9.98862	10.9659	10.7622	7.7622	4.27249	3.74503	2.79784	6.19613	7.63601	4.17843	5.6357	7.401	7.80207	10.2802	9.05582	7.04923	9.45527	5.01165	4.29597
TCGA-A7-A5ZW-01	Low	1.06547	10.3918	10.8605	10.6352	6.90486	5.38766	5.35425	1.79324	7.98601	8.86398	6.18297	7.28586	6.03531	5.95416	11.3396	10.6082	7.83329	9.77142	5.15645	3.34937
TCGA-A7-A5ZX-01	High	1.26469	9.38331	9.26223	10.5465	5.93731	4.37387	4.74405	1.9532	7.09305	7.91931	5.31519	0.801419	6.39719	2.15991	10.0667	9.28858	6.78768	9.17005	4.89138	1.19171
TCGA-A7-A6VV-01	High	1.36237	10.1302	10.4567	10.3448	6.82269	5.73158	5.25785	2.54402	7.41077	8.80964	7.09571	6.89378	7.33245	5.87333	11.5191	10.4396	8.44749	9.27702	5.77803	3.8223
TCGA-A7-A6VW-01	High	1.41515	10.8118	12.0277	11.8605	5.71647	3.89876	2.16178	3.50144	5.56485	6.49461	3.56645	1.30368	5.00858	2.09738	8.76433	9.15344	7.00205	9.90405	8.02251	5.09696
TCGA-A7-A6VX-01	High	1.41285	10.2959	11.7532	11.3293	6.20009	4.53502	4.10859	2.00279	5.46371	7.2653	5.57693	2.0294	6.91867	3.23674	9.88145	9.40686	7.14414	9.07822	5.80226	3.84943
TCGA-A7-A6VY-01	Low	0.649502	12.3061	12.2372	12.2255	7.58977	5.77696	5.85191	4.84435	8.69792	9.41037	8.3937	1.71252	9.20159	4.10022	12.3706	11.8794	10.2899	10.2551	7.30587	5.19575
TCGA-A8-A06N-01	High	1.25925	9.68623	10.4546	9.69169	5.00626	3.52495	2.5626	0.638173	5.16717	6.05535	3.72493	5.01626	4.25001	3.85511	8.85024	8.05914	6.26064	7.5054	4.08329	3.12665
TCGA-A8-A06O-01	High	1.29479	9.57768	10.5541	10.0843	6.50382	5.23388	4.55704	2.05159	7.47012	7.93376	6.40219	4.90865	6.13319	4.56339	10.8356	10.0003	7.79322	9.26501	5.14772	3.49949
TCGA-A8-A06P-01	High	1.23041	9.28394	9.55323	9.45209	7.02752	5.54748	5.12223	2.05306	7.7039	8.58841	7.05228	5.33453	7.26913	4.59403	11.4558	10.717	7.67841	9.04237	4.18259	1.83738
TCGA-A8-A06Q-01	High	1.35928	6.7687	8.52351	9.26894	5.54831	4.3005	4.00365	1.82776	5.95725	7.00007	5.2481	2.57075	5.72113	2.27386	9.72129	8.75043	7.66148	7.82056	3.09136	1.32147
TCGA-A8-A06R-01	High	1.74487	10.5137	10.9508	10.1432	6.27333	5.05728	4.36827	3.14033	7.56529	7.83855	6.13849	7.04206	6.09435	5.59987	10.8791	9.68783	8.24819	9.57921	5.52741	3.92208
TCGA-A8-A06T-01	High	1.1807	10.701	11.549	11.3668	6.29621	4.71227	4.31981	2.31942	7.33517	7.47042	5.66818	6.40634	4.81514	4.50242	10.3932	9.41079	7.24152	9.96817	6.41196	4.63498
TCGA-A8-A06U-01	High	1.43024	11.7634	12.5608	12.0639	8.01514	6.10367	5.18335	2.56563	8.38251	8.45758	6.45891	7.61286	6.78283	6.12007	11.3387	10.528	8.46722	10.5902	7.4237	3.48512
TCGA-A8-A06X-01	High	1.34819	10.5718	11.3541	11.4484	6.41724	5.05609	4.3312	2.83855	7.50099	7.879	5.84731	6.5337	5.80935	4.12279	10.6219	9.57894	7.97396	9.77663	6.2097	3.24155
TCGA-A8-A06Y-01	High	1.29157	10.0213	10.7881	10.1523	5.36482	2.87931	2.17801	0.884244	5.18727	5.65604	3.80807	1.58738	5.23413	1.02375	8.27983	8.1596	4.73912	9.25383	5.17742	2.67757
TCGA-A8-A06Z-01	High	1.47527	9.08772	9.4058	9.9258	5.01828	3.68279	3.08616	0.231713	6.42383	6.66571	4.85529	3.41272	5.07483	3.39042	9.67937	8.96091	6.29153	8.1374	4.04037	2.27975
TCGA-A8-A075-01	High	1.23501	10.2229	11.201	10.6441	7.07555	5.41405	5.28862	2.85686	7.51349	8.13872	6.53887	6.42544	7.54051	4.87291	11.474	10.0622	7.8174	9.6109	5.82138	2.64724
TCGA-A8-A076-01	High	1.60021	9.85877	10.4176	10.8008	6.37427	5.27097	4.58781	1.4515	7.24596	7.64706	5.52279	5.32098	5.68251	3.86488	10.8453	9.60088	7.9335	9.09724	5.49342	4.32158
TCGA-A8-A079-01	High	1.10081	8.43481	9.88736	9.3407	7.38037	5.14703	4.29262	1.68117	6.96883	8.12263	4.90972	6.05639	5.00513	4.63422	10.6021	9.48426	8.07428	8.31422	4.29495	2.24347
TCGA-A8-A07B-01	High	1.80296	9.32851	9.68203	9.76757	5.82531	4.72225	4.69411	0.838085	7.24724	7.40461	5.67645	6.46054	4.8239	4.23271	10.4931	9.58645	8.5023	8.68606	3.81842	2.48846
TCGA-A8-A07C-01	High	1.27343	9.41485	9.86604	9.58314	6.43597	5.58137	5.55349	2.91985	7.93676	8.3347	6.77016	7.08028	6.50691	4.96298	11.5451	9.87976	8.28268	8.78851	4.90807	2.33842
TCGA-A8-A07E-01	High	1.11706	9.71305	10.2036	9.94921	6.51919	5.07529	4.77995	2.31144	7.91554	8.61821	6.76185	3.67149	7.5623	1.59017	11.191	10.4334	9.28451	9.66212	5.10688	3.17145
TCGA-A8-A07F-01	High	1.40749	10.1138	10.8321	10.2274	6.81953	5.65677	5.2578	1.68587	7.64454	7.92988	7.09255	3.79419	7.81001	3.35819	11.0994	10.6119	7.48813	9.47173	6.25369	3.79401
TCGA-A8-A07G-01	High	1.53753	10.5789	11.1513	10.8997	6.6359	5.25303	4.73136	2.45426	8.08434	8.45298	6.08341	6.49963	7.23766	5.50916	11.1853	10.2209	9.74355	9.42104	5.69878	2.40029
TCGA-A8-A07I-01	High	1.62385	11.0427	11.4849	10.7229	6.29823	4.837	4.09594	1.98431	7.33142	7.58036	5.95247	6.22571	6.30807	3.81391	10.6235	9.27981	9.16735	9.52123	5.77644	3.52408
TCGA-A8-A07J-01	High	1.10944	10.6289	11.0255	10.611	8.032	6.44092	5.61633	2.64696	9.01573	9.40912	6.2558	6.93623	6.44589	5.99965	12.2881	11.2964	9.49465	10.0901	5.45946	3.21164
TCGA-A8-A07L-01	High	1.45459	9.14466	9.09047	9.68478	5.49968	4.42173	3.69784	0.760887	6.02434	6.88899	5.10024	3.36656	5.31377	3.05292	9.81584	9.22349	6.37806	8.34461	3.95027	1.85855
TCGA-A8-A07O-01	High	1.34386	10.3686	10.5223	9.5607	5.36275	3.78488	2.54432	2.68094	5.96439	6.29244	5.53005	4.27884	6.39608	3.61594	9.31775	8.89394	6.06068	8.43007	5.22669	2.22878
TCGA-A8-A07P-01	High	1.19785	8.85136	9.58702	10.3803	6.48604	5.80194	4.23217	1.63408	7.41621	8.47579	6.79448	5.68888	6.72805	4.99851	11.386	10.5187	9.24975	8.45147	4.30116	1.88354
TCGA-A8-A07R-01	High	1.14793	10.4841	10.6273	9.63699	4.36509	3.1517	2.14561	3.88603	4.85593	5.42969	4.2903	3.74868	5.05258	0.746339	7.9957	8.03123	4.87758	9.07975	6.44208	3.71104
TCGA-A8-A07S-01	High	1.20873	10.04	10.3481	10.397	5.99017	4.76564	4.6101	1.23245	6.98341	7.56915	5.6387	1.83171	6.45619	2.28727	10.1046	9.58302	9.26362	8.89185	4.29702	2.92568
TCGA-A8-A07U-01	Low	0.825308	11.6891	12.2691	11.9333	7.62893	6.03057	5.22142	5.10271	8.19606	8.63941	7.56574	7.14776	7.49598	5.88636	12.0108	11.1304	9.19142	10.4385	7.79176	4.11901
TCGA-A8-A07W-01	High	1.49831	9.3224	10.3415	9.74621	6.75452	5.49714	5.41387	1.08597	8.35764	8.77169	7.11865	6.35961	6.60384	4.98616	11.6393	10.4247	8.49321	9.16303	4.67175	2.9695
TCGA-A8-A07Z-01	Low	0.874536	11.5853	12.5805	11.7719	5.89896	4.52368	3.85986	1.64336	7.02703	8.16378	5.81844	4.18765	5.562	4.11195	10.4886	10.12	7.21495	9.47558	6.6454	3.887
TCGA-A8-A081-01	Low	0.654881	10.0168	10.8038	9.96811	6.93099	5.82044	5.31772	2.75913	7.64817	8.59414	7.3456	4.76354	7.53947	4.35785	11.4466	10.7567	9.5	9.55241	5.00777	2.82391
TCGA-A8-A082-01	High	1.54641	10.4675	10.6188	11.0874	6.76851	5.28697	5.35155	1.33832	8.23914	8.4679	6.62288	4.46612	6.95001	4.40762	11.2559	10.3598	7.69611	8.86009	4.74821	2.5086
TCGA-A8-A083-01	High	1.1893	10.4198	10.8895	10.8886	5.29152	3.6949	2.81501	0.583998	6.3928	6.92852	4.75529	2.04189	5.94939	3.72566	9.30032	8.97609	8.5021	8.6852	4.98617	3.12498
TCGA-A8-A084-01	High	1.38596	10.9182	12.0733	11.6399	5.84897	3.60007	2.21278	1.0353	5.111	5.31943	2.5603	4.70766	2.81317	2.38705	9.01376	7.76314	6.92297	9.47872	6.25612	3.33831
TCGA-A8-A085-01	High	1.15043	7.93076	8.72401	8.5924	4.78295	3.4529	2.60757	0.324604	4.30444	6.28289	3.08611	3.77983	3.55869	3.4966	8.8222	7.64899	5.76731	8.32412	3.23269	2.19007
TCGA-A8-A086-01	High	1.32886	9.51183	10.1594	9.84961	6.07541	4.84195	4.11658	1.26938	7.39339	7.49173	4.57756	6.64362	5.10468	5.09635	10.6767	9.21432	8.04124	8.62845	4.67928	3.12831
TCGA-A8-A08A-01	Low	0.995595	10.6099	11.2596	10.9978	6.83665	5.76046	5.56155	1.96968	8.31252	9.30689	7.28186	5.55217	7.54867	5.15946	11.5774	11.1176	10.8279	8.91479	5.68379	3.76145
TCGA-A8-A08B-01	High	1.5195	11.3395	11.7184	10.923	7.0654	5.15596	3.80603	2.72791	7.17	7.46003	5.36574	6.2932	6.10553	5.01653	11.0427	10.2872	8.36219	9.67371	7.0681	4.48494
TCGA-A8-A08C-01	Low	0.906211	9.72	10.4285	10.1271	6.59478	4.81831	4.29805	2.5899	6.98532	7.26083	5.54133	3.15322	7.00713	3.95433	10.58	9.82103	9.75295	8.496	5.11352	3.38002
TCGA-A8-A08F-01	High	1.2507	9.78667	10.4751	10.188	7.67831	6.11803	5.89367	2.09256	8.73475	9.1979	7.16353	7.11613	7.28689	5.04845	12.2308	10.6027	9.09535	9.47241	5.3561	1.85013
TCGA-A8-A08G-01	High	1.47887	10.6203	11.491	10.8583	6.42456	5.29808	4.22895	2.24526	7.38392	7.93708	6.3853	5.94597	6.37664	4.3487	10.7987	9.8534	7.48823	9.37375	5.43998	3.9481
TCGA-A8-A08H-01	High	1.69829	10.9789	11.4845	10.5276	8.17709	7.00541	5.66943	2.53659	8.90759	9.5982	6.62831	7.56222	6.19782	5.86383	12.2882	10.7468	9.41885	10.5941	6.06864	3.8435
TCGA-A8-A08I-01	Low	0.524957	12.7225	13.5276	13.0102	8.61921	7.38065	6.58976	5.3711	10.0153	10.3513	9.38469	7.74976	9.23629	7.5427	13.521	12.5984	11.2798	11.9059	6.35455	3.25734
TCGA-A8-A08J-01	High	1.40573	10.65	11.0496	10.8629	6.36322	5.20785	4.63855	1.94413	7.44734	7.84317	5.80855	6.89308	5.30102	5.0756	10.7225	9.79371	7.93847	9.42355	5.39816	2.46455
TCGA-A8-A08L-01	High	1.35737	10.047	10.6062	10.4919	6.64971	5.51799	5.34482	2.59431	7.54909	8.66041	5.75309	7.51671	5.95485	5.71093	11.4545	9.54406	8.4997	9.14114	5.21103	2.87225
TCGA-A8-A08O-01	High	1.41451	8.53872	9.41057	9.69436	5.10625	3.77032	3.60155	1.2812	5.72301	6.48589	4.20666	2.75455	5.12523	2.60796	9.14953	8.5395	7.4772	8.85175	4.52436	2.70652
TCGA-A8-A08P-01	High	1.41475	10.894	11.499	10.8633	7.39604	6.04007	5.74072	2.28986	8.57258	8.94049	7.89103	7.03896	6.47942	5.92525	12.1027	11.3084	8.62146	9.95843	6.00403	2.68238
TCGA-A8-A08R-01	High	1.13688	10.1236	10.9231	10.6142	6.73322	5.8937	5.57929	4.09415	7.6783	8.76335	7.14738	7.88475	6.21909	6.23241	11.7275	10.3906	8.80324	9.7354	6.23983	3.93931
TCGA-A8-A08S-01	High	1.50604	10.7607	12.2979	11.2789	7.91908	5.61007	4.06118	2.37091	7.99113	7.72518	5.71679	7.0937	6.91044	6.62046	11.4728	10.5432	8.96848	9.63784	6.32678	4.27313
TCGA-A8-A08T-01	High	1.21275	9.04417	10.0691	9.47497	6.66307	5.17231	4.72378	1.93033	7.50667	8.01555	5.99165	6.93383	6.42018	5.99058	10.9276	9.89933	8.09627	8.59238	4.21901	2.45534
TCGA-A8-A08X-01	Low	0.958611	9.20442	10.22	9.56738	6.64537	4.82777	5.05923	4.76991	7.08819	8.14728	6.62171	3.32978	7.09725	3.52817	10.889	9.91946	6.86647	8.9419	4.70772	2.2629
TCGA-A8-A08Z-01	High	1.66647	9.81107	10.4516	10.3301	7.02502	5.9893	5.73114	1.47447	8.30724	8.44192	6.54261	5.62178	6.64854	5.79454	11.5848	10.4114	8.32097	9.33486	5.36483	2.30965
TCGA-A8-A090-01	High	1.11833	10.5209	11.2412	10.6187	6.55412	5.59901	4.63053	1.58513	7.72109	7.94886	6.58541	5.80405	6.07543	4.50465	11.0085	9.98278	7.80285	9.37092	5.77329	3.45493
TCGA-A8-A091-01	High	1.19897	8.60744	9.53078	9.68392	6.0323	5.02015	5.39393	2.18079	7.65493	7.95533	5.7496	5.67864	6.35587	4.71592	10.5838	9.22779	7.56432	8.62409	4.03569	2.53533
TCGA-A8-A092-01	High	1.8211	9.34196	10.0888	9.97932	6.33765	5.04537	4.47533	2.00494	6.52929	7.50852	5.52129	6.49112	4.92195	4.7305	10.5189	9.48843	7.69458	8.65724	4.26434	3.06844
TCGA-A8-A093-01	High	1.163	9.16274	9.91523	10.3571	6.62452	4.50402	3.51889	1.04897	7.224	7.6215	4.8682	5.9037	5.06014	5.20986	10.891	9.4166	7.54256	8.49533	4.2761	3.01755
TCGA-A8-A094-01	Low	0.860458	9.65306	10.9096	9.80635	6.98639	6.0392	6.10235	3.16022	8.08787	8.78141	6.24338	8.2691	7.1004	6.01606	12.1662	9.8805	9.02242	9.36553	5.54061	2.736
TCGA-A8-A095-01	High	1.17795	9.51191	10.1827	10.188	6.61122	5.22847	4.81196	1.87887	7.44696	8.16663	4.98209	7.24788	6.04015	5.23301	11.036	9.16218	8.53052	8.89647	4.50578	2.66349
TCGA-A8-A096-01	Low	0.842596	11.0961	11.9224	11.6607	7.78378	6.64939	6.26946	2.85909	9.37438	9.77796	8.01701	4.29216	8.71545	6.61245	12.4908	11.5532	10.4141	10.2773	6.59273	4.84868
TCGA-A8-A097-01	High	1.26136	10.9904	11.6416	10.7749	6.67355	5.39998	5.19017	2.30438	6.58202	8.48029	7.07457	5.39615	6.13076	4.94945	11.3142	10.5528	7.83012	9.43253	5.68786	3.12862
TCGA-A8-A099-01	Low	0.947029	9.47697	10.1522	10.8156	6.02509	4.67142	4.75079	1.49632	7.73356	7.99661	6.33925	2.87301	7.11653	4.84951	10.5918	9.85308	8.78274	8.78347	4.48792	3.3087
TCGA-A8-A09A-01	High	1.34926	9.15783	10.0361	9.24226	6.21483	5.19079	5.35737	2.44279	7.23115	8.28011	4.87458	6.82492	5.02766	5.20205	10.9061	8.99475	8.05855	9.38134	4.97168	2.22466
TCGA-A8-A09B-01	Low	1.02376	9.42347	10.107	10.1716	6.25319	4.3422	4.24896	1.35032	6.75351	7.27346	5.00786	3.40439	6.3174	1.14196	10.1463	9.36002	7.20437	8.8501	4.55235	2.58044
TCGA-A8-A09D-01	High	1.3984	9.59798	10.608	10.1884	7.30214	5.82164	5.09506	1.46596	8.37331	8.81216	6.56021	7.23	6.86364	5.52137	11.6846	10.5818	8.82075	9.75893	5.15832	2.27924
TCGA-A8-A09E-01	High	1.31185	9.84453	11.4064	11.2352	5.14399	3.65466	3.02375	0.725666	6.1377	6.75479	4.31171	4.1526	4.97269	2.84315	9.40235	8.14006	6.70234	9.04623	6.75802	4.14613
TCGA-A8-A09G-01	Low	1.00384	10.5364	11.3347	11.933	6.7281	5.41715	5.56726	2.78972	8.02123	8.44846	6.49429	6.86542	7.38297	4.99636	11.4302	10.1709	9.52063	10.0498	6.29863	3.748
TCGA-A8-A09I-01	Low	0.987986	11.1284	11.7161	11.448	7.2482	5.91693	4.74016	2.93643	8.09171	8.05518	7.383	2.00622	7.48483	2.99526	11.7523	10.792	8.07347	9.98941	6.54733	4.35651
TCGA-A8-A09K-01	Low	0.577831	9.21454	10.1499	9.73695	6.35401	5.03149	4.91144	2.46968	7.67274	8.15718	6.71632	1.84414	7.01996	2.66749	11.0465	9.96248	8.88776	8.62005	4.66697	1.74028
TCGA-A8-A09M-01	Low	1.01756	10.6965	11.5358	10.8314	7.16537	5.82028	5.36474	3.07583	8.40066	8.72646	7.23631	3.57939	7.99626	4.63503	11.6797	11.0424	9.63649	9.68043	6.49837	3.60221
TCGA-A8-A09N-01	High	1.33852	10.2094	11.03	10.9472	5.99359	4.72894	4.42005	1.71917	6.8089	7.53283	6.1308	3.34055	7.01021	3.38883	10.2199	9.62003	6.21857	9.42494	5.74949	4.05048
TCGA-A8-A09Q-01	Low	1.05944	9.35074	10.2578	9.41802	7.26534	6.22735	6.39851	3.22203	8.38652	9.15725	7.79283	6.09658	8.17445	6.14784	12.2324	11.2046	10.152	9.09018	4.79006	2.5087
TCGA-A8-A09R-01	Low	0.837455	11.4971	11.9693	11.095	7.48713	6.2073	5.99226	2.57786	8.99092	9.26952	7.35989	8.21277	8.09361	6.17134	12.3086	11.1281	10.5352	10.1058	6.21904	4.06308
TCGA-A8-A09T-01	High	1.19096	9.95656	10.8479	9.81603	7.28371	5.40171	5.56412	1.35918	8.35255	8.78106	7.00196	4.5308	8.13876	3.25106	11.7212	11.1628	9.80466	8.97802	4.84893	3.25397
TCGA-A8-A09V-01	High	1.17234	9.01771	9.46572	9.56126	5.57406	4.25497	5.04207	2.17086	7.53951	7.67058	5.26361	4.91328	6.20008	4.52482	10.5691	9.25445	8.58307	8.56282	4.16817	2.76024
TCGA-A8-A09W-01	Low	1.00606	9.08335	9.61383	9.51539	6.68716	5.48499	5.00597	1.25996	8.26657	8.47898	6.90242	1.17743	7.40908	3.52511	11.1509	10.487	9.19123	9.02125	4.48118	2.09494
TCGA-A8-A09X-01	Low	0.925121	9.89885	10.7122	9.82835	7.5991	6.18089	6.51813	3.5934	8.914	9.35466	7.8187	6.07736	8.12741	6.15814	11.9952	11.1868	10.1078	9.69532	5.3289	2.17247
TCGA-A8-A09Z-01	High	1.21012	13.6199	13.7004	13.2744	7.90796	6.02932	5.91692	2.06821	8.17454	9.3923	6.72732	6.70356	7.35232	4.93223	12.0995	10.761	9.83157	11.5118	8.45589	6.30305
TCGA-A8-A0A1-01	Low	1.00185	10.7362	11.5808	10.8423	7.92649	6.98431	6.73514	2.82422	9.41523	9.73435	7.14825	9.30922	7.29436	7.43533	12.8658	10.8545	10.1318	9.97854	6.10324	3.49589
TCGA-A8-A0A2-01	High	1.11277	9.41487	10.1166	9.9441	6.68096	5.51902	5.6537	3.33639	8.46212	9.0057	6.94293	4.54744	7.62765	5.56048	11.5307	10.6848	9.66658	9.04327	4.85222	0.70925
TCGA-A8-A0A4-01	High	1.22301	9.89104	10.2854	10.1735	6.07689	4.4301	4.52284	1.75142	7.298	8.06514	4.96789	5.89532	6.23055	3.84812	10.372	9.71633	9.2503	9.77623	4.99325	3.11817
TCGA-A8-A0A6-01	Low	0.641017	11.7301	12.1367	11.4005	7.29553	6.27421	6.29621	3.77494	8.97928	9.18955	8.05155	6.82878	7.99596	6.62076	12.3209	11.3728	10.0371	10.1298	6.21715	2.16481
TCGA-A8-A0A7-01	Low	0.864493	11.0262	11.8795	11.092	8.00459	6.95179	6.29135	4.54525	9.29459	9.65657	8.1115	8.38262	6.86203	6.53163	12.7714	11.543	9.41337	10.6198	6.50169	3.14906
TCGA-A8-A0A9-01	High	1.26297	9.77376	10.6095	10.122	6.49102	4.70571	4.46484	1.22467	7.1301	7.87413	5.6148	6.09652	6.19166	4.62249	10.5898	9.45163	7.96576	8.96783	5.49894	3.70362
TCGA-A8-A0AB-01	High	1.33093	7.65648	7.67878	7.42828	4.74472	3.58808	3.54692	0.813683	5.45654	6.41267	4.5905	2.92252	4.05601	2.77456	9.22893	8.19823	5.59253	7.49714	2.39011	0.518568
TCGA-A8-A0AD-01	High	1.25906	10.0666	9.59813	9.34566	6.97461	5.96271	5.80222	0.719511	8.32189	8.99924	6.44759	6.93908	7.17782	4.49829	11.7877	10.371	8.73388	8.69361	4.11834	2.82391
TCGA-AC-A23C-01	High	1.25683	10.689	11.4496	11.2587	7.77042	6.06093	5.24796	3.83902	8.67862	8.60688	7.4003	4.01146	8.43358	3.30133	11.7906	11.5167	10.335	9.50083	5.70427	0.561226
TCGA-AC-A23E-01	High	1.31637	9.5686	10.4802	10.4489	6.64584	5.43632	5.67074	0.9707	8.13818	8.43148	6.33744	5.76683	5.47256	5.33222	11.461	10.4504	7.37224	9.10018	4.17718	2.70362
TCGA-AC-A23G-01	Low	0.898626	10.6158	11.1633	11.013	7.52504	5.76262	5.60146	1.95914	8.4805	9.31244	6.44091	7.24436	7.95284	6.03053	11.7418	10.9254	10.1969	9.96406	5.64579	1.96042
TCGA-AC-A23H-01	High	1.35253	8.13648	8.9634	8.71443	5.09319	4.02929	3.65861	0.958127	5.55355	6.34989	4.39193	4.65616	4.42167	3.86118	9.52826	7.91962	6.14641	8.39228	3.8352	1.06554
TCGA-AC-A2B8-01	Low	0.836174	9.73841	10.9307	10.3864	7.90867	6.29633	5.89469	2.54815	8.84448	9.08474	7.62402	5.77568	7.51016	5.87453	12.3302	11.3782	8.84814	9.82475	6.23899	3.57789
TCGA-AC-A2BK-01	High	1.094	8.22955	8.33575	8.34387	4.4271	3.50793	3.53647	1.20619	5.70104	6.84929	5.32667	5.331	4.60498	4.16225	9.32266	8.35909	6.45437	9.07916	3.45802	2.20834
TCGA-AC-A2BM-01	High	1.14844	10.0279	10.5007	10.0647	5.91684	4.90501	4.83836	2.59914	7.55608	8.11787	6.34662	1.99321	7.32193	0.4712	10.6879	10.2403	9.69908	8.94642	5.30112	3.36887
TCGA-AC-A2FB-01	Low	1.04786	11.0219	11.3768	10.7504	7.52604	6.32568	6.41476	4.41207	9.11519	9.4462	8.22544	4.65547	8.77288	4.60183	12.2159	11.581	8.43427	10.6039	6.63877	2.86532
TCGA-AC-A2FE-01	Low	0.980101	11.1537	11.252	11.547	7.62229	6.10055	6.13396	3.46976	8.91012	9.4332	6.89018	7.46387	8.23214	5.99707	12.07	11.1964	10.5951	10.4082	6.52804	1.72712
TCGA-AC-A2FF-01	Low	0.833278	9.71125	10.4093	10.0627	7.37194	5.95599	5.93264	3.74503	8.72608	8.94715	6.65661	6.58081	7.37904	5.31058	11.8657	10.465	9.80445	10.2468	5.1682	2.71805
TCGA-AC-A2FG-01	Low	0.917623	9.16528	9.78725	10.31	6.02234	4.49496	4.55802	2.45019	6.93057	8.00949	5.39694	1.31824	6.63508	2.37584	10.5786	9.75792	8.98949	9.47304	4.64782	2.31852
TCGA-AC-A2FK-01	Low	0.966093	9.8358	10.5453	10.1955	6.63037	5.20673	5.73061	3.14856	7.42408	8.57699	6.79882	5.25492	6.39829	5.70226	11.0749	10.173	8.04438	10.1707	5.56785	3.63395
TCGA-AC-A2FM-01	High	1.33412	8.24664	9.00276	9.41865	5.3427	3.91049	4.1102	0.639373	6.77276	7.04679	5.04088	2.6032	5.83973	1.45264	9.60819	9.00733	7.98338	9.02879	4.12247	2.97389
TCGA-AC-A2FO-01	Low	1.07631	10.5431	11.2154	10.6237	7.04528	5.82171	6.11234	3.77091	8.33915	9.12411	6.58595	7.74619	6.72082	6.31211	11.6063	10.3388	8.52847	10.2481	5.76107	3.9766
TCGA-AC-A2QH-01	High	1.47909	7.63429	8.16694	7.03384	3.42937	3.05776	3.94515	1.3334	3.70666	5.06089	2.38784	2.14439	2.6488	1.32174	8.03075	5.70904	4.16159	6.47558	3.69572	0.317815
TCGA-AC-A2QI-01	Low	0.91811	10.4342	10.9931	10.8074	7.01052	5.74565	6.20353	3.00764	8.72213	9.34652	6.93425	7.31433	7.7587	6.3666	11.7703	10.6457	8.88509	10.0209	5.88222	4.09603
TCGA-AC-A2QJ-01	High	1.48446	11.4583	11.1913	10.7596	7.62868	5.45463	4.60979	3.06222	7.80853	9.42403	5.55403	8.35351	6.65951	5.82978	10.5909	10.9736	9.52677	9.7403	5.82801	4.04972
TCGA-AC-A3BB-01	Low	0.646805	10.5423	11.3453	10.8677	7.76611	5.9172	6.12869	4.06073	8.18311	9.58966	7.14977	3.97712	8.36877	2.64847	11.936	11.4598	10.1926	10.2477	6.56823	3.89962
TCGA-AC-A3EH-01	High	1.20409	9.23061	9.71589	10.4752	6.52735	4.74938	5.32458	1.7462	7.72043	8.48409	6.46445	2.57207	7.91035	5.305	10.8393	10.6858	10.1101	8.69284	4.15288	2.0058
TCGA-AC-A3HN-01	Low	0.964815	10.4515	11.216	11.0173	6.9818	5.78057	5.83256	3.02868	8.34724	9.09865	6.87807	3.11668	7.83913	5.1092	11.4781	10.8088	9.79871	10.0917	5.85787	4.00563
TCGA-AC-A3OD-01	Low	0.746982	8.59795	9.54144	8.88057	6.64657	5.43047	5.09157	3.4021	7.82615	8.53688	6.96322	7.01698	5.75858	4.78963	11.3408	9.62669	7.54925	8.55796	4.86414	0.741988
TCGA-AC-A3QP-01	Low	0.968609	9.89025	10.5347	10.3683	7.43195	5.93212	5.96776	2.83585	8.73254	9.70339	6.09952	6.58253	6.59945	6.3333	11.8189	10.8634	8.80089	9.57381	5.30782	2.48729
TCGA-AC-A3QQ-01	Low	0.791447	7.38538	8.22202	8.11036	5.52327	4.73891	5.03916	2.94886	6.41409	7.53892	6.49757	4.14186	5.85516	3.41064	10.2376	8.7345	8.58085	7.57217	3.88988	0.156074
TCGA-AC-A3TM-01	Low	0.863522	10.3374	11.0239	10.3613	7.51277	5.22446	4.63943	3.15397	7.59489	9.26453	5.28385	6.40522	6.53817	6.08266	10.7904	10.9038	8.58273	9.12194	6.01683	3.32152
TCGA-AC-A3TN-01	Low	0.774805	9.7433	9.96652	11.0319	5.80773	3.93612	3.66939	1.46211	6.64131	7.80275	5.15091	1.61233	6.2898	4.7167	9.5114	9.43909	8.2174	8.84464	5.5187	3.60516
TCGA-AC-A3W5-01	Low	0.809457	10.6272	11.3288	9.95364	7.47666	6.27171	5.9194	3.38068	7.31741	9.52191	7.54527	7.63792	8.10133	5.95375	11.7462	11.078	8.70496	10.1004	6.73728	3.88708
TCGA-AC-A3W6-01	Low	0.793702	10.481	11.6339	11.2697	7.485	6.07528	5.58728	3.50252	8.64765	9.45014	6.76154	7.78995	7.24007	7.23227	11.6277	10.7297	8.5136	10.3992	6.87248	4.84584
TCGA-AC-A3W7-01	Low	0.65203	9.5339	10.3421	10.612	6.32949	4.71395	5.13522	2.16088	6.78132	8.22296	5.05228	5.23487	5.85358	4.45191	10.4488	9.17799	7.70851	9.41358	5.1608	3.08586
TCGA-AC-A3YI-01	High	1.68352	9.70992	10.2862	10.0911	7.07133	5.05222	5.03898	2.59428	7.81382	8.48184	6.14749	7.20472	6.55565	5.76832	11.3447	10.4815	8.52903	9.6871	5.64789	2.75173
TCGA-AC-A3YJ-01	Low	0.784662	10.6426	11.7085	11.6477	6.87724	5.61033	4.49733	1.30974	7.89397	8.62279	5.57853	6.22952	7.2208	5.01842	10.7387	10.267	8.16903	9.02002	5.72769	4.79601
TCGA-AC-A4ZE-01	Low	0.850366	8.59611	9.21623	9.16345	5.81205	4.50171	4.77214	0.908403	7.10577	7.83101	4.9488	5.70122	4.89802	4.62014	10.1033	9.18792	7.45646	9.20621	4.98812	1.93156
TCGA-AC-A5EH-01	Low	0.951777	10.535	11.1738	11.0628	6.73043	5.37258	5.21397	0.866712	7.66524	8.56676	6.74893	6.7831	7.56734	5.15044	11.2974	10.7571	9.41838	9.59969	5.40738	2.57214
TCGA-AC-A5XS-01	Low	0.803671	10.998	11.6504	11.7695	8.22897	6.26944	5.91161	3.72239	9.04918	9.69912	7.0562	8.5062	7.50489	6.73492	12.2197	11.618	9.80127	10.3903	6.99143	3.26088
TCGA-AC-A5XU-01	High	1.40836	10.3269	10.7167	10.9138	5.80512	4.19642	4.14508	2.21167	5.81691	7.90615	5.23944	6.10874	4.70262	5.00965	10.081	9.06431	7.44455	8.90065	4.64421	2.91309
TCGA-AC-A62V-01	High	1.58416	9.23683	9.54977	9.83701	6.51737	4.88361	4.13929	0.703046	5.79259	8.31496	5.00955	6.33231	6.59005	4.24223	10.0562	9.5427	8.03087	8.0391	4.68565	2.38252
TCGA-AC-A62X-01	High	1.10722	11.6299	12.1848	12.331	5.6676	2.7817	0.516661	4.23441	3.93334	4.99899	2.13355	1.68712	4.01602	0.889036	8.25286	8.53953	6.95031	10.2742	8.0091	4.09493
TCGA-AC-A62Y-01	High	1.52629	10.4677	11.6244	11.133	6.92647	5.49937	4.73913	1.3847	7.75963	8.37445	5.59521	6.40933	6.92242	4.0474	10.99	10.2419	9.64837	9.29056	6.20302	4.65167
TCGA-AC-A6IV-01	High	1.09908	10.5101	11.0473	10.6347	7.69301	6.43512	6.25717	2.72988	8.36506	9.54045	7.17596	6.74679	7.73671	5.15328	12.0216	10.8588	9.16026	10.4023	6.21166	1.70573
TCGA-AC-A6IW-01	Low	1.07767	11.0859	11.8967	11.3509	8.36693	7.21428	6.6973	3.52053	8.59347	10.4233	8.17867	9.08553	7.79723	7.42225	12.9347	11.8113	10.3879	10.6138	7.58099	4.4979
TCGA-AC-A6IX-01	High	1.17501	10.4115	11.1161	10.5452	6.92568	5.6165	5.34855	2.76095	7.80911	8.67921	6.33568	6.94768	7.03293	4.85977	11.4817	10.1514	9.79677	10.0018	6.01213	3.51906
TCGA-AC-A6IX-06	Low	0.946469	10.5883	11.344	10.7427	7.32151	6.34704	6.28148	5.19147	8.32147	9.23418	7.04609	7.60105	7.83147	6.41126	12.0679	10.4971	10.1575	10.1256	6.26069	3.50288
TCGA-AC-A6NO-01	Low	0.716736	8.96416	9.29554	9.87327	6.41236	4.5645	4.32647	2.38274	5.69923	8.25067	5.64945	2.90737	6.74509	2.66888	10.394	9.69988	6.28305	8.41683	4.44616	3.49117
TCGA-AC-A7VB-01	Low	1.01532	10.0066	10.4675	10.8649	5.43322	2.71555	1.88441	1.39376	4.24839	5.69098	2.97786	2.35914	2.16544	2.1202	7.55149	7.49183	4.39797	8.43899	5.08343	3.5628
TCGA-AC-A7VC-01	High	1.25756	10.3957	10.4816	9.80152	5.48775	3.72009	2.70097	1.1607	5.59579	7.41351	4.68324	3.45495	5.22945	3.53364	9.27181	9.49093	6.23027	9.35011	5.46183	1.53768
TCGA-AC-A8OP-01	Low	1.06154	8.61702	9.66632	9.42967	6.27681	5.03021	5.14847	2.98979	6.1734	8.18653	5.77882	6.59138	5.37898	5.41589	10.5468	9.3455	7.89392	9.3694	5.34894	2.85383
TCGA-AC-A8OQ-01	Low	0.760365	10.5046	11.8049	10.7199	6.66609	5.26174	5.45323	3.91676	7.14307	8.23074	6.38491	4.04527	6.84588	4.9354	10.6586	9.94665	7.52526	10.2021	7.49303	3.75288
TCGA-AC-A8OR-01	Low	0.986712	10.2284	9.84852	10.8901	6.62695	4.94055	4.57793	0.888273	6.97507	8.39873	5.88167	4.84472	5.2549	5.20206	10.7425	10.0827	7.54533	9.27564	5.29939	0.563939
TCGA-AC-A8OS-01	Low	0.66562	10.0803	10.583	10.6674	6.99261	5.51953	6.03523	3.33427	8.32739	8.70608	6.0155	6.45159	7.22287	5.40788	11.1302	10.2102	9.52283	10.1409	5.8552	1.77804
TCGA-AN-A03X-01	Low	1.06177	9.47811	10.0119	9.85539	6.20738	4.77018	4.06784	1.55258	7.50666	8.2855	5.77434	3.66786	5.72688	3.97656	10.5734	10.0509	7.62866	8.87333	4.20169	2.18567
TCGA-AN-A03Y-01	High	1.1074	9.00141	9.84464	9.4421	6.42605	4.91707	4.3978	2.41477	7.38771	8.04334	6.01257	3.12206	6.86707	4.44556	10.6757	9.94276	8.9677	8.95552	4.83694	2.06388
TCGA-AN-A041-01	High	1.14112	10.0629	9.72243	9.99139	5.85863	4.63257	4.47083	1.27301	7.07571	7.77334	5.70369	6.30104	6.37036	4.99209	10.6387	10.0297	7.39827	8.8877	4.74954	2.18455
TCGA-AN-A046-01	Low	0.631541	11.027	11.3345	10.8638	7.04782	5.46235	4.92617	2.78635	7.7984	8.75584	7.07321	6.61314	6.80504	6.41726	11.5305	10.8583	7.89061	10.1596	6.18567	3.34453
TCGA-AN-A049-01	High	1.37697	9.76631	11.1124	11.0823	6.81738	5.27322	4.43513	2.8088	7.75352	7.91142	6.04596	6.51816	7.00603	4.74234	10.902	10.1129	8.10641	9.43659	5.9684	2.15481
TCGA-AN-A04A-01	High	1.31195	10.1946	10.2759	10.2502	5.37024	3.89213	3.40342	1.68073	6.18374	7.05586	4.47435	4.38157	5.84872	2.96308	9.7211	8.80284	8.24585	8.87399	4.7934	2.44312
TCGA-AN-A04C-01	Low	0.869959	9.03543	8.87928	7.87422	5.63852	4.11042	3.80109	2.10057	6.62733	7.11454	6.00834	4.8487	5.96019	3.61331	9.79943	9.41834	5.91171	8.28934	4.17008	1.79361
TCGA-AN-A04D-01	High	1.37319	8.7821	8.62672	8.40709	4.29569	2.67203	2.25826	2.12096	5.32927	5.68003	3.80726	4.18697	3.20662	2.98936	8.55565	7.08254	5.14916	8.09003	3.78875	2.01273
TCGA-AN-A0AJ-01	High	1.45639	10.5247	10.8781	10.3935	6.85375	5.8563	5.3917	2.59538	7.83278	8.73508	7.1334	7.04205	7.2754	4.70278	11.7787	10.4397	9.82204	9.75369	5.43283	3.97769
TCGA-AN-A0AK-01	High	1.53828	9.08609	9.77209	9.29957	6.3283	4.88962	4.52021	1.87235	7.44881	7.97273	6.29773	5.30094	6.34661	4.54668	10.6433	9.78994	7.41366	8.75772	4.281	2.06982
TCGA-AN-A0AL-01	High	1.30219	11.2203	11.3635	10.2337	6.29531	4.79464	4.41495	3.76635	5.88871	7.50915	5.43033	6.05397	6.20381	3.99094	10.4044	9.39845	8.74756	9.44489	6.3802	3.65497
TCGA-AN-A0AM-01	Low	1.02915	10.594	12.0089	11.4586	7.61793	5.42548	4.37335	2.79075	8.12567	8.62455	6.72876	7.23126	7.52461	5.53593	11.3213	10.7756	8.86614	10.2343	6.7844	3.60498
TCGA-AN-A0AR-01	Low	0.746726	7.77506	8.67882	9.27842	5.0998	3.51946	3.27867	3.89693	5.62639	6.67509	4.32303	2.72715	5.08481	3.01781	9.06478	8.56343	6.39327	7.4856	3.1211	2.93507
TCGA-AN-A0AS-01	High	1.54464	9.78661	10.361	9.79715	6.71127	5.19164	4.53577	1.19577	6.90705	8.26086	6.05602	5.28057	4.84431	4.98484	10.8581	10.326	7.12272	9.07952	4.62498	3.56516
TCGA-AN-A0AT-01	Low	0.856841	10.2348	10.5997	10.4335	5.60885	4.38116	4.22914	4.39365	6.52337	7.38713	5.61933	6.39529	5.38387	4.98324	10.1729	9.02257	6.8283	8.98366	6.54181	4.6553
TCGA-AN-A0FD-01	Low	0.803659	11.373	12.1561	11.7411	6.26887	4.50447	4.46535	2.51267	7.32473	7.83849	5.75157	6.08083	4.66421	5.09001	10.4327	9.72566	7.33826	10.0079	6.31213	3.89271
TCGA-AN-A0FF-01	Low	0.722361	11.5151	11.9878	10.6877	6.69679	5.22153	5.0196	2.67286	7.90794	8.29894	6.37606	5.81472	6.3487	5.91051	11.0936	10.5557	8.03829	10.0355	6.93531	3.75043
TCGA-AN-A0FJ-01	Low	0.910391	8.89055	9.99678	8.02837	5.57098	4.09007	4.48538	4.84826	5.28109	7.0088	5.22109	5.98627	5.81296	5.23311	9.64022	8.68185	6.55454	7.95381	3.90929	2.08948
TCGA-AN-A0FK-01	High	1.19047	9.50451	10.8622	11.8057	5.07532	3.73229	3.04768	1.0164	5.93164	6.93897	4.90172	3.32628	5.74841	3.75204	9.29655	9.16747	8.04108	8.71522	4.77598	2.86434
TCGA-AN-A0FL-01	High	1.43999	11.1919	11.4115	11.3121	5.33476	3.07941	1.94572	1.24143	4.64261	6.02163	3.62212	2.81466	3.40998	3.12335	8.97865	8.66991	5.06262	9.81521	5.64358	3.46256
TCGA-AN-A0FN-01	Low	0.706141	11.0179	11.6513	10.7524	7.48599	5.85743	5.62003	4.22894	8.88341	9.4696	8.19487	7.45667	6.89389	7.40279	12.094	11.4429	8.21358	10.539	6.36387	3.34597
TCGA-AN-A0FS-01	High	1.25801	9.62072	9.67802	9.91283	5.93206	4.36502	4.02669	1.07816	6.69772	7.81688	4.82109	4.72086	6.12191	2.88042	10.1792	9.25475	7.09522	9.34105	4.89239	2.70798
TCGA-AN-A0FT-01	Low	1.03741	9.67435	10.0023	9.16701	6.39865	4.68362	3.9351	1.66225	7.69123	7.9009	6.24149	2.90955	7.07171	1.46448	10.6562	10.3929	10.6623	9.08088	4.72509	2.72918
TCGA-AN-A0FV-01	High	1.26256	10.015	10.0886	9.44756	5.32793	3.97228	3.69486	0.692604	6.46948	6.82361	4.82442	5.86847	5.65887	3.6922	9.72914	8.89346	8.37887	8.82189	4.72942	2.93666
TCGA-AN-A0FW-01	High	1.33329	10.0804	9.95653	9.86027	6.50179	4.54578	3.66434	1.90986	7.33915	8.25294	5.25731	5.19234	6.30574	4.44267	10.5799	9.78992	9.12034	9.26293	4.51377	1.71931
TCGA-AN-A0FX-01	Low	0.997904	9.52133	9.78725	9.87984	5.18092	3.8052	3.69902	2.63959	6.31402	7.40738	4.67329	0.969969	6.17056	2.27894	9.54543	9.05766	8.23896	8.81292	5.33953	1.61071
TCGA-AN-A0FY-01	High	1.34251	9.89252	9.98668	9.84284	5.97469	4.21614	3.90334	1.80198	6.64641	7.52176	5.27249	1.7637	5.92609	2.40704	10.1378	9.41172	6.80813	8.96684	4.88507	3.48031
TCGA-AN-A0FZ-01	High	1.33909	7.99332	8.74788	8.48505	6.37886	3.91671	3.36959	0.914289	6.48783	6.83041	4.57381	0.477354	6.27819	0.894995	10.1261	9.34978	6.53956	8.8415	3.44165	1.71738
TCGA-AN-A0G0-01	High	1.32429	9.73388	9.71911	9.60975	5.42402	4.27059	3.49499	1.17846	6.29134	7.05172	4.96501	4.77264	5.26278	3.12684	9.92872	8.48677	6.785	8.65612	4.38157	1.55995
TCGA-AN-A0XL-01	High	1.22752	9.27263	9.56151	9.18245	6.4197	5.0327	4.92691	1.5027	7.40484	8.03807	5.94328	4.06198	5.55719	3.92979	10.775	9.96472	7.17562	9.72895	4.85359	3.03174
TCGA-AN-A0XN-01	High	1.30354	10.3752	11.1486	10.6336	6.94591	5.58332	5.5567	1.02819	8.0251	8.2013	7.22906	7.02387	6.72758	4.8907	11.5178	10.4141	7.71844	9.42511	5.43038	2.39845
TCGA-AN-A0XO-01	High	1.48983	9.45086	10.0494	10.3463	5.67249	3.43072	2.32327	1.22763	5.62602	5.88368	3.64676	3.7201	4.24854	4.91535	9.52812	8.81921	5.97724	8.62619	5.36433	2.33738
TCGA-AN-A0XP-01	High	1.103	10.7942	11.7959	11.8612	5.82243	3.69843	2.85341	1.33843	5.958	6.05637	3.66098	3.58148	5.01715	1.45983	9.23922	8.73892	8.36331	9.71328	6.38731	2.83827
TCGA-AN-A0XR-01	Low	0.845317	11.2375	12.0574	10.9631	6.98279	4.49503	2.23637	1.61964	6.99161	7.01982	4.88835	6.12977	5.95905	6.42981	9.95214	9.14685	7.39382	9.38751	6.70396	3.44034
TCGA-AN-A0XS-01	Low	0.897712	10.1377	10.8687	10.4848	7.07735	5.52809	5.29688	3.96994	8.2059	8.94917	6.36876	6.94783	7.58472	5.57856	11.2788	10.3045	8.17114	9.74606	5.88536	3.24177
TCGA-AN-A0XT-01	High	1.27495	9.31919	9.59968	9.64448	5.3444	3.96323	3.82302	2.24515	6.35702	7.0268	4.50495	5.38773	5.43055	3.54135	9.49655	8.61702	8.01982	9.03096	4.5016	2.07595
TCGA-AN-A0XU-01	Low	0.917268	12.0697	12.5807	11.9011	7.8336	5.65293	5.94215	5.42573	8.53169	8.65672	6.32765	6.94617	7.12967	7.04442	12.2274	10.8581	8.85446	10.3673	7.68427	3.217
TCGA-AN-A0XV-01	High	1.13967	10.6197	11.2399	10.9293	6.69963	4.84023	4.49311	3.61632	7.40876	7.57244	5.86163	6.71415	5.69341	5.22016	10.7194	9.38579	7.64612	10.1269	6.39035	2.85542
TCGA-AN-A0XW-01	Low	0.907767	10.9224	11.8169	10.9029	7.55872	6.30631	6.4856	3.35195	8.78127	9.5145	7.67915	7.89046	8.24572	6.71802	12.2734	10.8994	8.6418	10.0187	6.26502	4.72935
TCGA-AO-A03L-01	High	1.08917	10.1437	10.421	11.0137	5.99468	4.454	3.72857	2.2632	6.47594	7.41042	5.76708	3.09155	6.81982	0.872288	10.166	9.7287	8.54777	9.32766	5.63257	3.30636
TCGA-AO-A03M-01	High	1.3533	10.9435	12.2553	11.1839	6.97596	5.79145	5.55116	3.06818	8.55547	8.58591	6.98342	7.82014	6.20223	5.81851	11.8522	10.1984	8.216	10.6605	6.82587	4.19838
TCGA-AO-A03N-01	High	1.36768	10.1848	9.71072	9.9081	5.93672	3.20679	1.84209	1.09452	6.10157	6.84718	3.96047	4.59611	5.50797	4.90881	9.29819	8.14002	5.55804	8.33352	4.01099	1.5083
TCGA-AO-A03O-01	High	1.77984	10.4541	11.6007	11.4377	6.9288	5.19511	4.56836	2.35648	7.30173	8.05584	6.01346	6.72216	5.8318	4.60626	11.1457	10.104	7.96305	9.98199	5.71455	2.70152
TCGA-AO-A03P-01	High	1.19126	10.2736	10.714	9.96237	5.44126	4.08002	3.66736	1.32926	6.14718	7.10765	5.39487	3.66889	5.77116	3.43138	9.88867	8.70824	6.22225	9.20799	5.20921	3.47209
TCGA-AO-A03R-01	Low	0.681507	9.65968	10.4277	9.76965	6.48148	4.69867	4.06668	3.19402	7.34865	8.47386	6.60929	5.1928	6.50869	5.42065	10.8567	10.2292	6.61007	9.32448	5.55857	1.6685
TCGA-AO-A03T-01	Low	0.575323	11.9406	12.3389	11.2082	7.79848	4.83941	3.7938	2.89683	8.92867	8.547	5.87935	6.99936	7.30747	5.67575	11.737	10.7819	8.64331	10.1105	6.97746	3.47033
TCGA-AO-A03U-01	High	1.10081	10.2154	10.8209	10.7396	7.7077	6.62822	5.81408	3.67872	9.10745	8.97764	6.90562	4.85706	7.55928	5.07287	12.0386	11.2928	10.4859	10.2227	5.92411	1.53592
TCGA-AO-A03V-01	High	1.14626	9.49228	10.4642	10.1815	6.06595	4.22862	3.97189	2.17937	6.76648	7.50697	5.37588	4.19927	5.4429	3.91441	10.1031	9.20296	6.24959	9.72422	5.76983	2.39619
TCGA-AO-A0J2-01	Low	0.572558	11.7473	12.3069	10.9185	7.75185	5.56827	3.77461	2.61009	8.33836	8.64194	6.01754	7.38648	7.1854	6.60826	12.0697	11.2127	9.36687	10.3362	7.00491	3.14794
TCGA-AO-A0J3-01	Low	0.784492	9.12086	10.016	9.96358	5.06329	3.5631	3.14635	2.27625	6.69674	6.70726	4.61489	5.11553	5.6291	3.3385	9.64002	8.63175	8.18743	7.58249	3.62308	2.81093
TCGA-AO-A0J4-01	Low	0.783608	11.3857	11.7427	11.4078	7.1212	5.56032	5.76113	4.23812	8.31773	8.46184	7.24506	3.38898	7.75123	3.96499	11.4214	10.6237	8.78886	10.1083	8.05967	5.24261
TCGA-AO-A0J5-01	High	1.27142	9.42692	10.2408	10.079	6.63522	5.2677	5.55618	2.1788	7.70403	8.44557	5.97928	6.8728	5.74679	5.78367	11.1593	9.75426	8.09308	9.28732	4.97022	2.00675
TCGA-AO-A0J6-01	Low	0.10125	11.4738	12.2441	11.2401	7.92804	5.65614	6.67682	5.31466	8.5837	8.67616	7.68989	5.56962	7.40323	5.29338	11.7513	11.37	8.10687	9.95749	7.66408	4.20383
TCGA-AO-A0J7-01	High	1.26412	8.00455	8.68736	8.32718	5.53534	3.83644	2.99922	0.697589	5.94524	6.84491	4.946	4.74517	4.01315	4.30002	9.27589	8.3727	5.85284	7.79979	3.75044	0.693097
TCGA-AO-A0J8-01	Low	0.888679	9.78537	11.626	10.5642	7.47064	5.6673	4.61143	3.33482	8.51291	8.44296	6.73159	6.41459	6.57648	7.06024	11.831	11.3814	8.75995	9.18413	6.16416	3.22283
TCGA-AO-A0J9-01	Low	0.614941	11.0118	11.1997	10.1483	7.56734	5.28901	4.50799	2.87778	7.82999	9.21132	6.3699	7.42626	7.20603	4.93965	11.6427	10.7571	7.997	9.95073	6.19498	3.74989
TCGA-AO-A0JA-01	High	1.22354	9.9811	10.3156	10.5402	6.6958	5.54603	5.83343	2.89072	7.96983	8.97153	6.71326	6.66458	7.43318	6.12241	11.6574	10.5155	9.79595	9.42316	4.63627	2.79337
TCGA-AO-A0JB-01	Low	0.685448	9.28444	9.47612	9.1257	6.48224	3.91608	3.54669	1.89923	6.19365	8.05496	5.36723	4.00286	6.21543	4.08541	10.0946	9.42026	8.80149	9.1143	5.13208	2.34592
TCGA-AO-A0JC-01	Low	0.541443	11.6405	12.2978	11.4399	8.87532	7.93836	7.95851	7.76679	8.95995	10.1652	9.09631	7.80834	9.22449	6.88257	13.1099	12.2841	9.09941	11.5829	8.25889	3.46224
TCGA-AO-A0JD-01	High	1.51812	9.63776	10.4768	9.77081	6.37776	4.89843	4.51694	2.34976	7.45687	7.75358	6.65611	3.27707	6.67678	2.92017	10.9333	9.76652	8.70118	9.10419	5.1218	3.04722
TCGA-AO-A0JE-01	High	1.09481	10.2044	11.739	11.2824	8.58088	6.49381	5.55486	4.53595	9.27302	9.33486	8.38879	4.90863	8.62106	5.56522	12.5416	11.4601	8.39216	10.0044	6.23757	2.69758
TCGA-AO-A0JF-01	High	1.18121	10.1228	10.6956	10.5457	7.13481	5.92434	5.59079	2.68478	8.61984	9.00449	7.09454	3.38221	8.47351	7.33897	11.8526	11.2878	10.6917	9.9241	5.15951	3.15702
TCGA-AO-A0JG-01	Low	0.72689	11.4448	12.0163	11.4226	6.85703	5.47636	5.44133	3.54617	8.14549	8.50748	7.12048	5.9069	7.43885	5.73678	11.3487	10.6659	9.43097	10.4127	6.29551	3.24216
TCGA-AO-A0JI-01	Low	1.00493	8.03936	10.4623	10.4964	4.74245	3.38317	3.79339	2.19273	5.69445	6.5509	3.4049	5.15246	3.82592	3.46718	9.3388	7.30443	6.44011	8.84347	4.11134	2.68641
TCGA-AO-A0JJ-01	Low	0.614142	10.4613	11.0901	10.3967	7.34136	6.04323	5.90307	3.95878	9.13168	9.51608	7.1028	7.45684	6.94681	6.18154	12.217	10.8956	9.18945	10.0299	5.64424	2.23897
TCGA-AO-A0JL-01	Low	0.856463	10.3505	11.076	9.9092	6.05203	3.1641	2.40374	4.12582	5.86482	6.21246	3.47324	5.57887	4.78719	3.93011	8.99322	7.52965	5.96479	8.82219	5.61146	2.71158
TCGA-AO-A0JM-01	High	1.49998	11.0169	11.464	10.6544	5.97121	4.25557	3.21336	1.57488	6.49647	7.1244	4.57357	5.66404	5.03908	4.08814	10.0139	8.95495	7.16994	9.45104	6.16347	3.42138
TCGA-AO-A124-01	High	1.17779	11.0516	11.3323	10.2424	5.86861	3.96667	2.32377	4.84418	6.21195	6.76167	5.35509	4.1971	5.58622	3.35085	10.1131	9.87047	7.25345	8.94158	6.85032	4.02113
TCGA-AO-A125-01	Low	0.698077	9.85973	10.3844	9.98817	5.43545	2.85603	2.29877	0.466048	4.89333	6.16537	3.70695	2.10458	4.90599	2.4241	8.40832	8.20719	4.65091	8.10686	4.90511	3.35089
TCGA-AO-A126-01	Low	0.785432	10.1234	10.3776	10.1112	6.92193	4.55562	4.1697	1.78131	6.01882	8.78003	6.86664	3.47516	6.85654	3.13212	10.7737	10.4393	9.27911	9.39709	5.12847	2.62637
TCGA-AO-A128-01	Low	0.77344	11.8751	12.7438	11.6573	8.36448	7.19874	6.30063	4.92782	9.14028	9.70642	9.0908	8.43585	7.95131	6.16101	13.2824	12.0198	9.92589	10.9002	7.73428	3.94219
TCGA-AO-A129-01	Low	0.494136	10.8386	11.4591	10.9483	6.72452	4.91139	4.66327	4.11802	7.2292	8.22233	6.68266	5.14381	7.07563	4.98923	10.9329	10.5026	9.20833	9.69766	6.67176	4.55271
TCGA-AO-A12A-01	Low	0.768251	10.3703	10.93	10.8132	7.33278	5.54014	5.25663	3.0098	7.89856	9.13655	7.09409	4.63875	7.83166	4.12156	11.4957	10.5179	7.6547	9.65205	6.06353	2.88217
TCGA-AO-A12B-01	Low	1.03112	9.87564	11.5962	11.0724	4.50077	3.35624	2.63383	0.798809	6.36266	6.36792	3.80888	3.80586	4.62036	2.22014	8.98238	8.2559	7.7768	8.07257	5.05951	4.1942
TCGA-AO-A12C-01	High	1.26755	8.83787	9.08047	9.53827	5.69584	4.26276	4.69472	1.95664	6.62463	7.20854	5.58107	1.83563	5.68734	1.9251	10.015	9.1417	8.1197	8.77352	4.01314	1.42065
TCGA-AO-A12D-01	Low	0.885586	10.6432	12.0091	11.3125	6.98277	5.78268	5.34255	3.37977	8.15262	8.25382	7.14585	6.1117	7.47561	5.42806	11.6077	10.719	7.92459	10.2004	5.75416	3.7108
TCGA-AO-A12E-01	High	1.31243	9.7593	10.2345	10.3405	6.79101	5.04037	4.90104	2.08845	7.82944	8.13706	5.62668	5.67304	5.92537	5.34093	10.8781	10.1882	7.73046	9.53159	5.04907	3.21905
TCGA-AO-A12F-01	High	1.30772	9.21073	9.24078	9.17965	5.18273	3.17906	2.7455	2.49911	5.78362	6.61779	3.82805	1.02769	5.32721	0.4439	9.02398	8.48027	7.39815	8.34275	3.53271	1.77295
TCGA-AO-A12G-01	High	1.32475	9.21877	9.71068	9.38779	6.06975	4.73124	4.78158	1.81757	7.52232	8.24398	5.92361	1.87124	6.21692	3.09348	10.7402	9.72013	7.2882	9.04958	4.39262	1.73916
TCGA-AO-A12H-01	Low	0.980815	11.1962	11.2419	10.9902	6.00287	4.72763	3.87378	0.55092	6.5026	7.75382	5.20049	5.81963	4.7802	4.38557	10.3812	9.31221	7.59576	9.2304	5.95131	3.82039
TCGA-AO-A1KO-01	High	1.24719	7.81486	8.63771	8.45528	5.4716	3.41633	4.14447	2.38593	5.9757	6.46025	4.86669	3.23231	3.89439	2.76086	9.60139	8.24781	5.14552	8.64869	3.12164	0.411392
TCGA-AO-A1KP-01	High	1.20011	8.71006	8.48591	8.9143	5.2516	3.12349	2.38086	0.980869	5.70327	5.52394	4.02869	4.13542	4.7343	2.27275	8.80153	7.35831	4.75789	7.61631	2.89728	1.1967
TCGA-AO-A1KQ-01	Low	0.921547	9.99266	10.3419	10.5238	6.7301	4.86462	4.13071	2.94092	7.63342	7.79968	6.31099	6.82283	6.21596	5.96996	10.7942	9.85548	7.65481	9.18916	5.40157	2.56736
TCGA-AO-A1KR-01	Low	0.557843	10.2178	10.4342	9.68973	6.80209	3.21404	2.61896	4.5428	4.94307	6.74643	4.41369	4.50908	5.6753	2.67324	9.77731	9.78206	6.99721	9.13365	5.97987	3.41861
TCGA-AO-A1KS-01	High	1.66874	8.67939	9.1805	9.46722	6.44101	5.24257	4.84564	1.78886	7.02608	7.04213	6.80371	6.11944	5.35969	5.07572	10.7425	9.29565	6.05188	8.24376	3.1399	1.38809
TCGA-AO-A1KT-01	High	1.58809	9.74417	10.2734	9.45159	6.74001	5.34044	4.62605	1.32518	7.70479	8.33882	5.30911	7.77447	6.24167	5.98925	11.2651	9.46258	8.49003	8.51079	4.584	2.3264
TCGA-AQ-A04H-01	Low	1.06422	8.5974	8.80493	9.10049	5.33435	4.2246	4.20611	1.32321	6.383	7.22486	4.68743	5.15836	4.36013	4.08776	10.1772	8.50297	6.71581	8.64864	4.13209	1.68216
TCGA-AQ-A04J-01	Low	0.979456	10.5564	11.1197	9.85875	7.17928	5.70377	5.72325	5.6721	8.2677	8.63844	6.87084	7.02743	7.37481	5.5384	11.5748	10.4865	8.3948	9.82882	6.37865	4.05448
TCGA-AQ-A04L-01	Low	1.05497	8.34121	8.98338	8.95314	6.03948	4.60082	4.20849	1.19917	7.01735	7.4698	5.91759	2.19764	6.66069	1.15025	10.2664	9.51726	8.2472	8.12226	4.05345	2.16032
TCGA-AQ-A0Y5-01	High	2.20407	9.63479	9.97056	9.63013	5.50986	4.569	4.77683	0.882962	6.8084	6.97924	5.99967	5.43431	5.61314	3.92186	10.2778	9.46373	6.93093	9.11409	5.12873	2.74946
TCGA-AQ-A1H2-01	Low	0.979742	9.63558	10.804	10.9017	6.26895	4.84576	3.97673	0.804735	7.23295	7.52295	4.55701	5.15103	4.06166	3.62679	10.0885	9.49277	7.23076	8.48876	4.36876	0.765208
TCGA-AQ-A1H3-01	Low	0.849338	9.38528	10.222	10.1079	6.75951	5.17724	5.54018	2.71527	7.44367	8.30649	6.46858	6.88757	5.01849	5.30919	11.1489	9.61434	7.4224	9.3391	5.22169	2.62496
TCGA-AQ-A54N-01	Low	0.858043	9.97152	10.2918	9.98794	5.62861	2.88708	2.03889	2.98101	5.70559	6.55296	2.71118	5.089	4.00505	2.94584	8.54135	7.54476	6.27994	8.83375	6.93259	2.6678
TCGA-AQ-A54O-01	Low	0.589802	10.0834	10.391	9.295	6.11654	4.01715	3.37298	2.26936	6.34951	7.5951	5.482	5.74065	5.68272	5.67702	9.80777	9.24245	6.78602	9.01796	5.92062	3.25261
TCGA-AQ-A7U7-01	Low	0.408264	11.6735	12.1965	11.9796	7.57905	6.60101	6.28492	5.12607	9.37545	9.72157	7.45546	7.90696	8.56819	6.74725	12.2447	11.5648	10.9488	10.9233	7.44426	4.90236
TCGA-AR-A0TP-01	High	1.64301	8.54093	9.88815	9.59718	5.04747	3.04392	1.9044	3.6441	4.64666	5.3755	3.036	2.24852	2.89852	2.37685	8.27203	7.72996	5.72221	8.49515	4.521	1.61712
TCGA-AR-A0TQ-01	High	1.28686	10.9345	11.1315	10.8318	6.30046	5.10607	4.90497	2.67949	7.75079	8.03711	6.24532	6.62658	6.41445	4.77232	11.0681	9.7542	8.22748	9.99228	5.67361	4.6142
TCGA-AR-A0TR-01	Low	0.855304	8.59964	9.89901	10.161	5.78488	4.2119	4.23006	2.6622	6.8736	7.28444	4.99211	5.54248	4.41235	4.45413	9.82848	8.69563	6.59578	8.49807	4.30091	2.77088
TCGA-AR-A0TS-01	High	1.37244	10.0082	11.1234	10.2942	7.53116	6.35387	6.49895	5.97824	8.19471	9.07926	7.71848	6.5837	7.48619	5.63648	11.6338	10.949	8.06045	10.4754	6.58834	3.58112
TCGA-AR-A0TT-01	Low	0.925698	11.0061	11.3506	10.6789	7.76244	6.735	7.03363	4.79705	9.19222	9.32457	8.49953	6.63965	8.33954	6.86449	12.3869	11.6298	8.76489	10.3183	6.60773	4.12378
TCGA-AR-A0TU-01	Low	0.212949	11.0547	11.7834	11.2755	7.42722	5.23979	5.35019	4.14725	8.21725	8.15869	6.85203	5.52961	6.50911	4.93889	11.6629	10.8707	9.13646	9.28883	7.46593	0.380798
TCGA-AR-A0TV-01	Low	0.844521	11.0048	11.5521	11.3584	7.0283	5.85373	5.16249	2.8381	7.77067	8.81012	7.3792	5.54352	7.33431	4.78169	11.4421	10.8082	9.47264	9.57988	6.21162	2.65118
TCGA-AR-A0TW-01	High	1.18265	10.158	11.4636	10.3963	7.13115	5.93115	5.74923	2.93107	8.32293	8.54532	7.34122	5.86034	7.79287	5.74688	11.6676	10.4277	9.65124	9.79091	5.88336	3.73463
TCGA-AR-A0TX-01	High	1.31691	11.1028	12.1289	11.3494	7.61749	6.35643	6.23814	3.94518	8.92185	9.50402	8.05947	7.50612	7.68804	5.98143	12.4049	10.9321	8.91159	10.6597	6.33011	3.53829
TCGA-AR-A0TY-01	High	1.26559	8.06386	8.41635	8.33976	5.78422	3.89901	3.62899	2.04055	6.30033	6.89155	4.44359	4.96228	4.7233	3.24785	9.62254	8.29925	6.79834	9.11046	3.8859	1.73319
TCGA-AR-A0TZ-01	High	1.57685	8.58069	9.44832	10.2491	5.36686	4.56768	4.70732	0.997302	7.22077	7.35146	6.15624	4.59841	7.05102	3.95872	10.2758	9.82475	8.55176	8.58345	4.81862	0.531501
TCGA-AR-A0U0-01	Low	0.325145	12.0224	13.5452	12.701	8.2982	6.69192	4.54321	5.99737	9.72174	9.75713	8.08772	3.2245	8.87993	4.26078	12.6397	12.134	11.0489	10.796	8.14927	4.75693
TCGA-AR-A0U2-01	Low	0.923909	9.54789	10.1729	9.73702	6.503	5.32395	5.51524	1.89019	7.77606	7.8675	6.8923	1.729	7.5684	2.75214	11.1282	10.1511	9.59893	8.85877	4.90733	2.06809
TCGA-AR-A0U3-01	Low	0.975958	8.75886	10.1471	10.7438	6.59266	5.19011	4.63211	1.68958	6.84344	7.4559	5.39645	5.3737	6.4948	3.88104	10.4962	9.10911	8.31679	9.02145	4.67455	0.186467
TCGA-AR-A0U4-01	High	1.22315	11.2875	11.6169	10.5786	7.66303	6.35425	5.56755	4.61397	8.92923	8.96767	7.53619	8.35504	5.83416	6.42494	12.9083	10.9998	9.29761	9.45154	6.45019	1.74425
TCGA-AR-A1AH-01	High	1.11105	7.3394	8.38963	8.91967	5.16819	3.31741	2.83336	2.75817	5.34644	6.39924	4.34344	1.53226	5.15151	1.63193	8.73265	8.01755	4.53484	8.16398	3.22742	1.24075
TCGA-AR-A1AI-01	Low	0.530983	10.3462	11.5146	10.9112	7.37687	5.74029	5.24147	4.45844	8.31526	8.15588	7.42272	7.37055	7.44927	4.97896	11.6589	10.4747	8.68712	9.29668	6.48571	3.21181
TCGA-AR-A1AJ-01	Low	1.06926	11.5867	12.4521	11.8421	8.30451	6.85321	6.3834	6.10185	9.33914	9.29393	8.1811	8.95106	7.13284	7.0879	12.8429	11.5278	9.6815	10.6339	7.7162	0.90663
TCGA-AR-A1AK-01	Low	0.94433	10.6603	11.2819	10.7155	7.55185	6.43037	6.4314	3.2943	9.29482	9.39096	7.52161	7.868	8.22849	6.00655	12.1725	11.2961	9.47062	10.488	6.26026	2.23696
TCGA-AR-A1AL-01	Low	1.0182	8.88152	9.44607	8.94429	6.64261	5.3595	5.55244	3.23941	7.87135	8.92264	6.29437	6.78116	7.11059	5.20522	11.3838	10.0655	9.44347	9.48786	4.59434	2.65654
TCGA-AR-A1AM-01	Low	0.899674	9.97839	10.9776	10.9844	6.68724	5.1804	5.19521	2.67118	7.89617	8.67754	5.73394	6.53075	7.09922	4.95804	10.8596	10.0077	9.27869	9.76099	6.09054	3.51888
TCGA-AR-A1AN-01	High	1.29358	9.22423	10.487	10.0253	6.04029	4.66512	4.17579	1.41196	6.56086	7.71265	4.49503	7.18686	5.03173	6.15513	10.4341	8.64139	7.98609	9.01198	4.59371	3.42005
TCGA-AR-A1AO-01	High	1.42245	11.4909	11.6866	10.9246	8.16494	7.36062	5.8183	3.54885	8.87711	9.65007	7.11453	7.76017	7.60677	5.75601	12.2649	11.0988	9.31503	10.5678	6.79392	4.38103
TCGA-AR-A1AP-01	Low	0.920792	9.77626	10.6622	10.5344	6.52559	5.43618	4.74405	1.83015	7.87638	8.26312	6.64046	5.29059	6.89295	5.1111	11.1006	10.5003	9.05671	9.38042	5.35323	1.6299
TCGA-AR-A1AQ-01	Low	0.611229	11.4211	12.232	10.8199	7.03567	5.77205	5.16773	5.09151	8.44064	8.89248	5.94811	8.25587	6.4963	6.35265	11.7592	9.93928	9.2825	9.95658	6.98074	4.48992
TCGA-AR-A1AR-01	High	1.32493	10.3609	11.1817	10.3124	7.29698	6.04408	5.57392	3.43689	8.39596	8.48662	7.70285	2.89231	7.53511	3.2411	11.9581	10.7036	7.65527	9.18198	5.70302	2.85109
TCGA-AR-A1AS-01	High	1.33109	9.17572	9.66996	9.9221	7.31061	5.19708	4.40119	1.5123	7.24241	7.806	5.10897	5.61845	4.85463	4.77932	11.4298	9.93943	7.71923	8.30952	4.15468	1.96484
TCGA-AR-A1AT-01	Low	0.829881	11.1219	11.8738	10.9723	7.45508	6.18193	5.90342	3.54902	8.66804	9.19916	6.10975	8.40366	6.80384	6.09965	12.1275	10.2707	9.86347	10.1231	6.98893	4.05387
TCGA-AR-A1AU-01	High	1.34945	9.20877	9.64976	9.78339	6.00964	4.33696	4.1516	1.83572	6.86503	7.22077	5.01291	5.54831	6.23658	3.90089	10.0244	9.12746	8.67937	9.42222	4.84022	1.44325
TCGA-AR-A1AV-01	High	1.59944	8.52063	9.74602	10.1164	5.84145	4.9019	5.03419	1.1192	7.16086	7.25861	5.8139	1.81225	6.7179	2.45714	10.241	9.62671	9.05572	8.82178	4.63959	1.61309
TCGA-AR-A1AW-01	Low	0.739	10.879	12.038	11.189	7.93451	7.07872	6.82084	5.80072	8.61037	9.33415	8.50886	6.8522	8.28487	6.13562	12.3927	11.6324	8.80651	10.6854	6.76266	4.66369
TCGA-AR-A1AX-01	Low	0.52258	11.2019	11.8526	11.4123	7.38891	6.3682	5.93716	4.73076	8.94676	9.23778	7.10885	2.46853	8.20173	4.72101	12.1838	11.1852	8.48885	10.5052	7.1681	4.4682
TCGA-AR-A1AY-01	High	1.18668	9.9142	10.3363	10.1633	5.13588	4.17152	3.38154	2.48495	5.40096	6.61259	4.47019	4.72166	4.51675	3.58123	9.39861	8.04706	6.55077	8.41088	5.5585	2.20527
TCGA-AR-A24H-01	High	1.29903	10.0485	10.6626	9.91581	6.04594	5.0788	4.41278	1.67048	7.0731	7.25294	4.48938	6.67933	5.20432	4.38529	10.4056	8.52477	7.50177	9.09889	5.63977	3.3761
TCGA-AR-A24K-01	High	1.4356	7.51558	8.59592	8.47444	5.00037	3.64739	3.87205	1.43657	6.16081	6.46674	4.94919	3.82564	4.72503	3.7774	9.49236	8.37017	5.66875	6.9438	3.29746	1.87374
TCGA-AR-A24L-01	High	1.13389	9.00335	9.54576	9.11239	5.74358	4.63863	4.00534	1.44413	6.91273	6.95432	3.97481	6.43294	4.58248	4.20158	10.1654	8.14902	7.25192	8.62822	4.13662	2.31541
TCGA-AR-A24M-01	High	1.36582	8.95804	10.2409	10.0017	6.44832	5.0713	5.33386	1.77221	7.47028	8.23008	6.42904	4.88755	5.53365	4.10318	11.0377	9.75872	7.02064	8.95265	4.57543	1.53695
TCGA-AR-A24N-01	High	1.25356	10.1923	10.9742	10.5408	6.87438	5.16546	3.78751	3.02601	6.70943	6.98163	5.23921	6.43214	4.64137	4.48473	10.6321	9.36866	7.36833	8.66618	6.70844	2.89277
TCGA-AR-A24O-01	High	1.08278	9.67997	10.3717	10.4636	7.14599	5.61301	5.62031	3.0347	8.3672	8.35068	6.92	5.68147	7.20073	4.98497	11.4308	10.3295	7.30293	9.70018	4.99405	2.96056
TCGA-AR-A24P-01	High	1.13913	8.58953	10.2156	9.13658	6.84956	5.12765	5.2846	2.25679	7.68321	7.97083	5.86977	6.72006	6.63508	4.52743	11.0419	9.78647	8.94139	8.67182	4.44874	1.86534
TCGA-AR-A24Q-01	Low	0.929954	9.82919	10.3347	10.2234	6.51994	5.24216	5.07339	3.04755	7.96812	8.15204	6.40239	6.89366	7.14058	5.41682	11.1155	10.0289	9.29662	9.05591	5.02269	0.459608
TCGA-AR-A24R-01	High	1.11858	9.74193	10.6725	9.69151	6.95956	5.38311	5.05642	2.48998	7.67355	8.0942	6.92278	6.4385	6.81179	4.79093	11.3134	10.2451	9.09657	9.2907	5.83943	1.64174
TCGA-AR-A24S-01	High	1.73399	9.69731	10.8515	10.1569	7.24185	6.12346	5.52952	2.38074	8.43259	8.38373	6.76418	6.70337	6.61142	6.50791	11.7468	10.1382	8.41266	9.40142	5.23301	3.59747
TCGA-AR-A24T-01	High	1.51459	9.60785	10.0097	10.0837	7.11535	5.85438	6.15854	2.71463	8.50677	8.76816	6.82759	7.14156	5.43641	5.81579	11.7657	10.1639	7.90417	9.45198	4.61053	2.53817
TCGA-AR-A24U-01	Low	0.988201	9.48787	10.979	10.5164	7.13122	5.8534	5.76749	3.9472	8.53565	8.56157	6.00321	8.08271	6.37247	5.96485	11.8815	9.7088	8.69319	9.66321	5.67795	2.62597
TCGA-AR-A24V-01	High	1.55081	10.253	10.9289	10.8029	6.46377	5.28737	5.07521	1.2147	8.1318	7.95962	6.24435	5.96341	6.72447	4.06197	11.1417	10.2831	9.62281	9.59483	5.60143	1.29966
TCGA-AR-A24W-01	High	1.14881	9.02623	9.92594	10.0362	6.24257	4.39232	4.44012	2.95464	7.38751	7.56371	5.18172	5.95627	6.19734	4.38139	10.3698	9.02403	8.41721	9.30337	4.06009	1.62424
TCGA-AR-A24X-01	Low	0.901102	8.50768	9.62578	10.0794	5.85481	4.43612	4.43587	2.64654	6.66885	7.45732	5.59497	2.06051	6.59559	1.45061	10.3774	9.45154	8.50955	8.64924	4.77135	2.33623
TCGA-AR-A24Z-01	High	1.1419	10.3188	10.9834	10.0132	5.31102	3.97589	2.93519	0.872433	6.06121	6.03528	4.00931	2.12265	4.25832	1.79643	9.14474	8.44679	6.14699	8.74086	4.72645	3.59136
TCGA-AR-A250-01	High	1.26765	9.99136	11.2856	10.7075	6.71055	5.59448	5.56742	2.2382	7.75483	8.30528	7.61482	5.7166	6.87683	4.77498	11.4123	10.7475	7.55842	9.70466	5.61955	1.23886
TCGA-AR-A251-01	High	1.63883	8.62987	10.2492	9.52874	5.77985	4.19973	4.04932	4.40195	6.98768	6.69844	6.12617	4.22575	6.38284	0.98975	10.2192	9.36932	8.07268	8.91393	5.4768	3.78347
TCGA-AR-A252-01	Low	0.94508	10.6135	11.2963	10.4826	7.62446	6.46548	5.97997	4.39242	8.70532	9.08426	7.73695	8.0419	8.13556	6.3597	12.3257	10.6518	8.40731	10.3277	5.80689	3.33066
TCGA-AR-A254-01	High	1.33058	10.2644	10.8621	9.78669	7.1837	6.08562	5.32869	2.36454	8.43111	8.16	6.07852	8.41	6.74719	6.2886	12.0704	9.76851	9.05751	9.46445	5.44843	2.46422
TCGA-AR-A255-01	High	1.25251	10.513	10.7626	10.3902	7.19864	5.62088	5.32985	2.80698	8.24692	8.0102	6.56715	7.01821	7.21063	4.24474	11.2973	10.1902	8.05403	9.73782	5.88327	3.57434
TCGA-AR-A256-01	High	1.31506	9.661	10.2771	10.2947	6.02918	4.5258	4.12319	2.85709	6.65221	7.18463	6.3387	5.64104	6.94898	5.58312	10.4089	9.7195	8.28818	8.63353	5.07832	2.55889
TCGA-AR-A2LE-01	Low	0.716262	9.39475	9.40574	9.06578	5.67682	4.42185	4.33354	1.56286	7.05064	7.60275	5.32412	6.44215	4.93209	4.36519	10.3378	8.71913	7.49268	9.01895	4.85117	2.80285
TCGA-AR-A2LH-01	High	1.14582	10.9251	11.8775	11.7578	8.63484	6.57464	5.99459	4.18077	8.71821	9.84298	8.18223	3.0793	8.90143	3.65341	12.8499	12.3141	11.5324	10.6659	6.81046	3.56639
TCGA-AR-A2LJ-01	Low	1.06508	10.3521	11.2866	11.0468	7.86276	6.03645	5.6144	2.71433	8.56058	9.62943	7.08035	5.44047	8.1087	6.23505	11.6316	11.4788	8.70857	9.96	6.01281	3.6093
TCGA-AR-A2LK-01	High	2.12677	8.84554	9.87364	9.30978	6.27359	5.30944	5.33935	1.60213	7.65961	7.78643	5.82984	6.18267	6.78902	4.62277	10.88	9.71158	9.14275	8.66602	4.72574	1.37335
TCGA-AR-A2LL-01	High	1.20096	9.78882	10.1343	9.92576	7.04946	5.78825	4.97936	1.94893	7.23526	8.33175	6.47649	5.2381	5.83157	4.39225	11.0012	10.4337	9.30907	8.92186	4.92271	1.38448
TCGA-AR-A2LM-01	Low	0.894597	9.47769	10.1964	10.172	6.85141	5.68036	5.66996	2.60795	7.79443	8.92889	6.95273	4.26977	7.71105	4.11621	11.5465	10.4497	7.79825	9.38504	5.02163	3.77703
TCGA-AR-A2LN-01	High	1.15372	9.91055	10.7396	10.4997	6.86099	5.35904	5.45334	3.07842	7.75174	8.64508	5.93123	6.43913	6.87291	4.70748	11.0999	9.94403	9.60641	10.0486	5.47064	2.11034
TCGA-AR-A2LO-01	Low	0.950953	10.21	10.9017	10.4453	7.20349	5.89032	6.2028	3.87927	8.1379	9.51164	6.56577	7.56452	7.56947	6.86617	11.8531	10.4982	9.60068	10.1945	6.47508	2.67915
TCGA-AR-A2LQ-01	High	1.34881	8.97469	9.85783	9.39279	7.06007	5.3905	5.56403	3.33972	8.43179	8.84066	6.4393	6.89771	5.2254	5.44212	11.3773	10.1859	8.21364	9.66921	4.68115	1.43743
TCGA-AR-A2LR-01	High	1.61161	9.50633	9.65873	8.76896	5.60866	4.63025	4.65836	5.40955	7.11979	7.65214	5.6585	1.38261	7.34967	2.28255	10.224	10.0408	9.52824	8.98765	4.35742	1.98029
TCGA-AR-A5QM-01	High	1.35679	10.4522	10.8504	11.044	7.23305	5.31148	5.271	2.75578	7.93831	8.56796	6.03199	2.0931	7.6593	3.19047	11.2907	10.7151	9.87194	9.56915	5.85492	2.52809
TCGA-AR-A5QN-01	High	1.15081	11.06	11.8365	11.11	6.20186	4.69999	4.54282	2.00462	7.35715	7.74201	5.39965	6.25886	6.57866	4.15879	10.3406	9.44925	7.50198	10.0358	6.79265	4.52908
TCGA-AR-A5QP-01	High	1.28931	9.21894	9.89531	9.99295	6.5943	4.78875	5.08997	2.88825	7.72821	8.40693	5.31753	5.6292	6.91631	5.29039	10.9369	9.84069	9.07351	9.47067	5.29427	2.17127
TCGA-AR-A5QQ-01	Low	0.754869	11.6381	12.0267	10.8833	7.12283	5.77178	4.8968	4.40556	7.61822	9.12563	6.60522	7.58709	7.68655	5.85607	11.7515	10.7984	8.82735	10.1847	7.28718	3.31447
TCGA-B6-A0I1-01	High	1.137	11.6808	12.034	11.4324	5.50812	2.42025	1.28533	4.40138	4.68836	5.34249	2.86196	3.55315	4.64725	1.41422	7.73904	7.31478	5.39038	10.0115	8.4775	4.3288
TCGA-B6-A0I2-01	Low	-0.05428	12.4393	12.6997	11.9185	8.73967	6.15034	4.35786	6.33865	9.09551	9.65987	8.1004	8.03336	8.44463	6.05881	12.7145	11.6186	11.4177	10.645	9.19909	5.65871
TCGA-B6-A0I5-01	Low	0.764571	9.53114	9.90152	9.8816	6.59434	4.30399	3.82563	2.52892	6.73982	8.4738	6.34303	5.31209	7.33218	5.55575	10.4536	10.2779	6.62374	8.70801	5.61171	2.23718
TCGA-B6-A0I6-01	High	1.31911	9.59903	9.85943	9.51733	5.70957	4.66871	4.65862	1.70482	6.51005	7.59992	4.26593	6.32929	4.77659	5.40316	10.3626	8.55219	7.61077	8.71927	4.68322	2.09808
TCGA-B6-A0I8-01	High	1.46459	7.81211	8.69857	8.80844	5.53161	4.02592	4.28618	1.06799	5.59363	7.35439	5.07645	5.34143	4.02956	4.1684	9.94999	8.8815	6.81131	8.56957	3.48953	1.47991
TCGA-B6-A0I9-01	High	1.39521	11.4849	11.2837	12.3445	5.77643	4.43968	4.38605	2.18574	6.58718	7.24889	6.02299	4.35571	6.10309	4.19251	10.1144	9.63846	8.33389	10.64	6.57355	1.14556
TCGA-B6-A0IA-01	Low	0.776854	10.3951	10.7325	11.32	4.81956	2.18401	1.30427	0.927895	5.21768	5.30342	3.39277	1.39654	5.26812	4.38158	8.28768	7.73085	6.90381	7.93602	5.95259	3.52654
TCGA-B6-A0IB-01	Low	1.01419	9.42361	10.1976	10.5101	5.63799	3.20237	2.23582	1.12499	4.47935	6.39082	3.58309	4.51783	3.53075	3.33552	8.34575	7.64858	5.08923	7.70211	3.61847	3.56049
TCGA-B6-A0IC-01	Low	1.00703	9.27274	10.7213	10.5455	5.26317	3.64394	3.19295	0.212901	6.24859	6.85435	4.35459	3.0445	5.2649	3.16261	9.21584	8.74711	7.68608	8.23162	4.37386	3.5761
TCGA-B6-A0IE-01	High	1.28389	9.46639	8.90631	9.14882	5.5345	3.34087	3.35442	3.03164	5.8409	7.60838	4.80238	3.65822	5.38475	3.08773	9.53371	8.9881	4.44023	8.66188	4.10984	1.54177
TCGA-B6-A0IG-01	Low	1.05872	11.1722	11.8738	11.1888	4.91825	3.38104	2.91162	1.82187	5.34039	6.65223	4.12474	4.1784	5.27153	2.80023	9.01142	8.39399	7.80519	9.80004	6.49621	3.09258
TCGA-B6-A0IH-01	Low	0.738858	10.2884	10.8311	11.0152	7.01526	5.25438	5.46023	3.56736	8.4289	8.81179	5.87288	6.85326	7.08382	5.71025	11.5711	10.1594	8.06572	10.0626	5.34636	1.86388
TCGA-B6-A0IJ-01	Low	0.388091	11.7126	12.0665	11.344	7.74214	6.13859	5.63958	4.76712	8.14245	9.20907	8.21527	5.66672	8.75689	5.7049	12.2322	11.6678	8.39976	9.61387	7.58847	3.92676
TCGA-B6-A0IK-01	Low	0.932906	9.47711	10.0892	10.6835	6.10068	4.52761	4.3175	2.48092	7.18421	7.8136	5.29267	6.57072	6.05749	4.48994	10.5722	9.17592	7.33127	9.17644	4.70157	2.36653
TCGA-B6-A0IM-01	High	1.14833	10.1267	10.5472	10.2	5.23287	4.11078	3.92193	0.766385	5.14177	6.86003	3.41895	5.45794	3.31292	3.93779	9.62877	7.88042	6.92634	8.83142	5.75636	3.75778
TCGA-B6-A0IN-01	Low	1.01333	11.0039	10.6851	10.8152	7.2983	5.71642	4.84622	4.19068	7.70634	9.072	7.03143	5.21522	7.4148	3.39071	11.7053	10.7811	8.30633	10.2676	5.90627	2.9007
TCGA-B6-A0IO-01	Low	0.700612	12.2217	12.6654	11.1303	6.70764	4.66144	3.74296	3.42328	7.67959	8.0855	4.91034	7.3802	6.15357	6.07383	10.9654	9.2525	8.37311	10.1181	6.78783	3.65566
TCGA-B6-A0IP-01	Low	0.804673	10.3535	10.352	10.7798	6.45935	4.70663	4.65062	3.44108	7.46614	8.20303	6.00602	4.71973	6.29423	5.22486	10.6014	9.77128	6.87154	9.23564	5.71235	3.1215
TCGA-B6-A0IQ-01	Low	0.654822	10.1971	10.5803	9.82655	6.09343	4.38318	4.65611	4.2466	5.97205	7.99473	6.01338	5.23033	6.4893	6.34853	10.6304	9.70684	8.6145	8.84707	5.26986	2.30793
TCGA-B6-A0RE-01	Low	0.738619	10.2147	10.7182	9.77656	5.14417	3.7618	3.47827	2.78369	5.53264	6.80232	4.30348	4.40057	5.73477	3.2529	9.54358	8.81858	7.91295	8.82573	5.49129	3.45581
TCGA-B6-A0RG-01	High	1.38583	8.56803	9.46247	9.14213	4.71664	3.06679	2.48946	1.92167	5.64027	6.10275	3.93234	4.81752	5.26851	3.63252	8.88485	7.83379	5.89994	7.95297	3.6781	2.29822
TCGA-B6-A0RH-01	Low	0.807537	11.6162	12.2104	11.5652	5.51912	3.23507	1.91086	2.21716	5.17816	5.87186	3.58254	3.58641	4.92727	2.36111	9.05953	8.03357	5.75919	9.95589	7.71153	4.31871
TCGA-B6-A0RI-01	High	1.12822	9.82425	10.2909	10.1119	6.71122	4.5128	4.16884	1.23206	6.78265	7.76056	5.66419	2.03969	7.09626	3.81704	10.7134	10.0112	9.02858	8.59759	4.95865	2.89828
TCGA-B6-A0RL-01	High	1.20312	9.42442	9.97463	10.0967	3.89123	2.4105	1.54349	0.398437	3.17491	5.27043	2.93098	2.31152	3.96923	1.61932	7.63679	7.58953	3.14035	8.36067	5.10909	3.0915
TCGA-B6-A0RM-01	High	1.53179	7.94125	8.89302	9.46693	5.69227	4.01256	3.79489	1.24665	6.7023	7.29101	5.06475	4.83762	5.54212	3.08322	9.89678	8.75143	6.69586	8.15174	3.87412	3.0124
TCGA-B6-A0RN-01	Low	0.949785	9.34072	10.0965	9.98723	6.75828	4.7419	4.03299	2.25563	7.72859	8.15442	5.4204	6.17039	6.28497	4.99864	11.1965	9.90252	7.62976	8.60621	4.1685	2.0836
TCGA-B6-A0RO-01	High	1.11338	11.2833	11.663	11.5349	5.49323	3.94186	3.2117	1.0939	6.43587	7.0655	4.7375	0.676372	5.3709	1.98173	9.80523	8.96659	6.3793	9.67749	5.9639	4.70644
TCGA-B6-A0RP-01	Low	0.812071	10.2003	10.9904	10.6806	6.71723	5.42296	5.19124	1.4215	7.94641	8.5273	6.0292	4.46308	7.09885	4.95921	11.0016	10.5321	9.42096	9.10071	5.2931	3.3912
TCGA-B6-A0RQ-01	Low	1.0707	9.23724	10.0802	9.82538	5.89716	4.41795	5.547	2.81394	7.37299	7.81734	5.20684	5.51168	4.28368	4.39754	10.3191	9.05219	7.00554	9.71984	4.98362	2.18766
TCGA-B6-A0RS-01	High	1.25778	10.5584	11.2499	10.4437	6.70057	5.50434	4.71412	2.44591	7.71321	8.11241	6.42961	6.93823	6.74455	5.1749	11.2046	10.1103	8.25157	9.4712	5.43928	3.17043
TCGA-B6-A0RT-01	Low	0.375526	11.6013	12.2823	11.2838	8.10825	6.80625	6.79281	5.31617	9.26404	9.63993	7.78088	8.26309	7.98066	6.24287	12.5221	11.3461	9.53375	11.0007	7.63432	3.09035
TCGA-B6-A0RU-01	High	1.12487	9.59008	10.5828	10.8616	5.73503	4.02782	4.17226	2.18205	6.99892	7.29417	5.17057	4.2611	6.41342	5.74294	10.1112	9.34391	8.44111	9.40384	4.56841	3.62684
TCGA-B6-A0RV-01	Low	0.872584	10.2781	11.1847	10.6069	6.33842	4.82817	3.8522	2.79391	7.3463	8.00795	5.55291	6.09912	6.62823	3.76781	10.5164	9.64362	7.26377	9.73484	5.5831	4.07405
TCGA-B6-A0WS-01	Low	0.811078	10.7206	11.8584	11.4231	6.76747	5.38968	5.64201	3.64404	7.85702	8.80079	6.93087	7.91091	6.14663	5.83286	11.4348	10.2501	8.76833	9.75147	6.62747	2.55754
TCGA-B6-A0WT-01	High	1.33466	10.3305	11.0792	10.8369	5.94155	4.59956	4.65084	2.88319	6.83685	7.62806	6.32224	7.11333	6.57348	4.47354	10.497	9.96526	8.67551	8.98383	5.41783	1.79931
TCGA-B6-A0WV-01	Low	1.04922	8.10951	9.24871	10.0584	5.31624	2.74949	2.29843	0.867341	4.86037	5.28576	3.3376	3.20799	5.5569	1.9893	8.91528	8.115	7.13651	8.00964	3.27808	0.809732
TCGA-B6-A0WW-01	High	1.61369	9.89179	10.2959	10.4883	5.91415	4.12749	3.72716	0.734596	5.97198	7.14437	5.04255	4.37813	4.71278	4.15017	9.77866	9.17593	5.98621	8.80927	4.5076	2.34228
TCGA-B6-A0WX-01	Low	0.829467	9.7862	10.4909	10.0618	6.63856	4.94022	4.96759	4.03765	7.27102	8.41807	6.52933	5.92164	7.11428	4.97147	10.9331	10.2376	9.07476	9.28195	5.77854	2.98401
TCGA-B6-A0WY-01	Low	0.9282	10.9555	11.4296	11.2953	7.12617	4.98676	4.78803	2.98489	7.89406	8.14301	5.61689	6.42073	7.12327	4.54181	10.9073	10.1916	9.52874	10.1166	6.3841	2.47522
TCGA-B6-A0WZ-01	Low	0.526283	9.9695	10.2753	10.4149	6.89716	4.31794	2.48901	0.736849	5.5344	6.8798	3.56786	6.16039	4.0638	3.58398	9.48626	8.26845	7.43939	8.58296	4.78504	2.17384
TCGA-B6-A0X0-01	Low	0.627507	9.0978	9.44902	9.8287	5.15893	3.45883	3.55665	1.25998	6.37653	6.95803	4.51821	5.56445	4.52014	4.05661	9.42403	7.93048	6.27612	8.41139	4.6996	2.37859
TCGA-B6-A0X1-01	Low	1.0426	11.5718	12.3475	11.3731	7.55211	5.20983	5.44639	5.79883	8.37456	7.75612	7.00216	7.68151	7.50786	4.97941	11.3113	10.631	9.02398	10.223	7.63442	1.91742
TCGA-B6-A0X4-01	High	1.12767	11.4753	12.3318	10.9554	4.50258	2.91752	2.78991	2.40526	4.92865	5.83686	2.5478	4.89623	3.3426	4.45101	8.45217	6.71319	5.78573	8.26033	6.14108	4.70054
TCGA-B6-A0X5-01	High	1.18144	11.5198	10.6687	11.1445	5.34537	4.1518	3.95043	1.13396	4.97029	6.96732	5.24606	5.01994	5.48078	3.87097	9.60686	8.4226	5.35599	8.07733	7.02088	4.45957
TCGA-B6-A0X7-01	Low	0.873076	9.82376	9.86221	10.124	6.41434	4.39117	4.38241	1.99845	7.23373	7.74609	5.22689	2.69563	6.62966	3.57822	10.1935	9.69331	8.70319	9.52593	4.80983	0.0558399
TCGA-B6-A1KC-01	Low	0.951314	7.90207	8.71929	8.49912	5.676	4.48229	4.07918	0.503773	7.26033	6.98929	4.27886	6.46427	4.67557	4.12103	10.3993	8.2694	7.13844	7.86614	2.96267	1.09612
TCGA-B6-A1KF-01	High	1.15334	10.0583	10.132	10.5517	5.31284	2.30957	2.04223	5.7879	4.1086	5.2403	2.94459	2.39951	2.71452	2.08962	7.92529	7.1686	4.04585	8.80688	4.82155	2.68293
TCGA-B6-A1KI-01	High	1.09911	8.57033	10.0515	10.1363	4.85495	3.10244	3.08478	0.776501	5.64813	6.97793	3.10075	5.28497	3.75123	3.48974	9.23707	7.21532	6.10989	8.88734	4.465	3.40614
TCGA-B6-A1KN-01	High	1.6499	8.56926	10.9053	10.7555	6.0218	4.24953	3.74184	1.96119	6.38226	6.4523	4.0311	6.00963	4.47612	3.87055	9.60223	7.91761	6.63349	8.86948	4.96465	2.09738
TCGA-B6-A2IU-01	Low	0.970307	9.25991	9.45183	9.72886	5.99934	3.99649	4.06291	1.23499	6.90986	7.56154	4.49427	5.28397	5.33966	4.07159	10.1002	8.81366	7.3571	8.69725	4.1538	1.1689
TCGA-B6-A3ZX-01	Low	0.719468	10.623	11.7689	10.97	7.44479	6.46113	6.52207	6.06999	8.2075	9.41838	7.16099	6.86301	7.82355	6.63843	11.789	10.9366	8.42932	10.7763	7.31967	4.05096
TCGA-B6-A400-01	High	1.18567	10.708	11.0399	10.816	6.53017	5.10124	4.24011	3.86567	7.81086	8.51274	6.63371	7.38478	8.04257	7.2342	11.3904	10.7961	9.95573	9.06975	6.45205	2.68987
TCGA-B6-A401-01	Low	0.795849	10.2482	10.5233	10.2239	6.95029	5.15348	4.52073	3.37883	6.9756	8.49455	6.00964	7.06965	6.08206	6.0447	10.8545	10.1626	8.58388	9.28325	6.20365	3.11253
TCGA-B6-A402-01	High	1.33767	10.5109	10.4383	10.4625	5.08208	2.92613	2.13939	3.57746	5.41462	6.11873	4.59813	2.11181	5.4364	0.597426	8.77271	8.65467	7.26605	8.39022	7.25295	3.67836
TCGA-B6-A408-01	Low	0.913323	11.0237	11.5548	11.7149	7.01885	5.59591	5.18742	3.65355	6.86192	8.946	5.74342	7.95189	5.91475	6.13805	11.3231	10.2507	9.44021	9.68113	6.66661	4.3372
TCGA-B6-A409-01	High	1.15567	11.0486	10.9491	9.93543	5.68766	3.41644	2.79293	2.52821	5.61216	7.34198	4.7331	3.96945	5.7765	2.9171	9.2984	9.32009	8.24303	9.67764	6.52012	3.90996
TCGA-B6-A40B-01	High	1.19201	9.05781	10.5834	10.6026	7.80113	5.35188	4.61389	2.81444	7.782	8.65937	6.47707	7.23521	7.45151	5.57042	11.4423	10.719	8.9582	8.70952	5.31795	4.42358
TCGA-B6-A40C-01	Low	0.712567	10.7056	11.1429	10.6672	6.67633	4.96121	4.38409	1.54944	7.26403	7.98822	5.23491	5.84713	6.98209	4.81426	10.4445	9.88001	9.18553	9.36787	6.08414	4.74458
TCGA-BH-A0AU-01	High	1.38267	10.0891	10.4739	9.94594	6.43762	4.94334	4.9195	2.38471	7.61565	8.06152	6.0303	6.54659	5.78383	5.23325	10.8675	9.61733	7.7623	9.43839	5.23824	3.46443
TCGA-BH-A0AV-01	High	1.14367	9.96811	10.461	9.53394	5.95504	4.81267	4.24033	4.77976	6.7557	7.2462	4.78548	7.22825	4.7444	4.38314	10.4971	8.46276	7.42953	9.15919	4.98962	2.98229
TCGA-BH-A0AW-01	Low	0.840062	10.7464	11.0421	10.6497	7.42926	6.34315	5.91997	3.63242	8.80876	9.49167	8.0028	4.99897	8.57647	6.02415	12.2159	11.4046	8.45803	10.05	6.05604	3.33944
TCGA-BH-A0AY-01	Low	1.01754	9.96631	10.9761	10.3043	7.3698	5.56462	5.22211	1.43219	7.99705	9.04008	6.39934	6.92015	6.4983	5.73962	11.4632	10.2409	8.56417	9.59879	5.1744	3.17512
TCGA-BH-A0AZ-01	High	1.16126	10.2565	11.1169	10.6665	6.73377	4.82202	5.40289	2.11448	7.90365	8.1751	6.18683	4.67389	6.80122	5.09383	10.8066	10.0016	8.87853	9.56655	5.61841	1.35906
TCGA-BH-A0B0-01	Low	0.837105	11.1752	12.3364	11.9224	8.06816	5.95596	5.43756	3.53824	8.2565	9.5232	7.29479	6.56175	7.06738	6.55654	12.1888	11.6109	8.36315	10.5727	6.92977	2.76566
TCGA-BH-A0B1-01	High	1.44629	9.37359	10.9941	10.0881	5.5506	4.05991	3.74458	1.91887	6.57383	6.86832	4.42831	5.21481	5.14738	2.74944	9.73408	8.62454	7.08572	9.44986	5.0295	3.54604
TCGA-BH-A0B3-01	Low	0.927579	12.0136	12.6845	12.357	7.16704	5.24194	4.41376	4.51142	7.95343	8.52495	6.8706	1.90702	8.04952	4.12502	11.543	11.0219	9.85972	10.2015	7.5864	4.03453
TCGA-BH-A0B4-01	Low	0.971888	9.8372	10.2822	10.2381	6.61654	5.08197	4.97287	2.20577	7.98757	8.53392	6.53996	1.83857	7.64954	4.52657	11.0003	10.617	10.2151	9.56674	5.46897	2.42832
TCGA-BH-A0B5-01	Low	0.869116	10.1239	10.7875	10.1758	6.85613	5.58567	5.23688	2.16175	7.74763	8.57726	5.11562	7.16043	5.20417	5.70371	11.2807	9.33121	8.53099	9.55666	5.68358	2.44048
TCGA-BH-A0B6-01	Low	0.57438	13.2808	14.2539	13.6907	8.48857	6.57987	6.11745	4.73692	9.2957	10.5319	8.37155	6.86799	9.22381	7.13197	13.1944	12.7015	11.3069	11.6613	7.88066	6.36556
TCGA-BH-A0B7-01	Low	0.773957	9.77005	10.5185	9.90722	6.72974	5.53116	5.42222	3.86113	8.14018	8.73188	5.41135	7.61384	6.0385	5.87908	11.4758	9.46378	8.6455	9.81487	5.31323	3.19449
TCGA-BH-A0B8-01	Low	1.06391	8.53319	9.29619	9.4031	5.89555	4.38619	4.18632	1.506	7.16575	7.66063	5.40173	3.28266	6.20208	3.64712	10.2249	9.32447	8.74537	8.29637	3.77894	2.06948
TCGA-BH-A0B9-01	Low	0.56529	10.9878	11.6901	10.8603	7.48989	6.1787	7.53913	5.22984	8.73841	9.24858	7.43754	6.06826	8.09761	7.25093	12.1001	11.0229	8.43266	9.62883	6.70377	4.31919
TCGA-BH-A0BA-01	High	1.10494	9.1888	10.2503	11.0182	5.94558	4.56645	4.86663	2.71816	7.34293	7.90549	4.98402	5.27706	5.78509	4.14829	10.4468	9.08676	7.22753	9.38571	4.8083	1.9859
TCGA-BH-A0BC-01	Low	1.02202	10.9298	11.382	10.8178	7.31588	5.99623	5.58426	2.82439	8.92323	9.32257	7.15815	8.23634	7.09301	6.79763	11.9633	11.1215	9.7268	10.1639	5.70202	3.85851
TCGA-BH-A0BD-01	Low	0.846615	12.1219	11.7815	11.2779	6.57277	5.02002	4.39746	2.4882	7.68796	8.25526	6.55498	3.9717	6.79513	3.77324	10.9969	10.4437	9.44797	9.92122	7.152	4.47776
TCGA-BH-A0BF-01	Low	0.594133	11.05	11.6239	10.684	7.74804	6.3308	5.90252	3.583	8.84846	9.10592	7.61838	8.38717	6.69968	6.38378	11.9838	11.0767	9.23521	10.21	6.72871	3.81146
TCGA-BH-A0BG-01	Low	0.753358	12.0085	12.5962	12.1296	8.72669	6.73587	7.49961	5.50517	9.44791	9.91355	8.48319	6.44252	8.75348	6.29662	12.7411	12.1812	11.2778	11.0634	8.3932	5.66385
TCGA-BH-A0BJ-01	Low	0.807479	10.112	10.4269	11.0257	6.62479	5.16377	5.10191	2.29477	7.48907	8.68316	5.95848	6.8937	6.39975	6.02212	11.1433	9.82566	8.06736	9.7357	5.08928	3.32666
TCGA-BH-A0BL-01	Low	0.777418	10.9518	11.4945	10.7234	7.42841	6.09536	6.10102	3.78885	9.00771	9.49705	7.46981	2.06444	8.251	4.35949	12.065	11.2111	9.86827	10.0298	6.54875	4.03194
TCGA-BH-A0BM-01	Low	0.713116	9.54576	10.4376	10.775	6.2101	4.22401	3.80645	2.56966	6.70682	7.88829	5.35992	5.82412	4.85748	4.92214	10.182	9.13184	6.84107	9.331	4.66988	2.45107
TCGA-BH-A0BO-01	High	1.64148	9.90159	10.7826	10.3275	6.79101	5.07603	5.48769	2.81142	8.28705	8.38805	6.09285	6.62936	7.19437	5.17414	11.3381	10.2948	9.64042	9.93357	5.432	2.85402
TCGA-BH-A0BP-01	High	1.1905	9.03547	9.95915	10.1601	6.56914	4.78521	4.55164	1.79926	6.84478	7.778	5.2758	5.59555	4.29615	4.54618	10.4314	9.40044	7.32738	9.48973	4.62859	2.01076
TCGA-BH-A0BQ-01	Low	0.723173	10.3393	11.2623	10.6966	6.90617	5.01321	5.1013	3.08301	7.6542	8.70106	6.29209	5.10715	7.01692	4.7783	11.1437	10.4338	7.62978	9.54463	5.77518	2.84644
TCGA-BH-A0BR-01	High	1.33475	10.2887	10.9339	10.6637	6.85958	5.75449	5.60947	1.86881	7.79938	8.67529	5.30506	7.46156	5.68262	5.68998	11.594	9.55031	8.73274	9.82562	5.8807	3.73324
TCGA-BH-A0BT-01	Low	0.602881	12.0387	12.1782	11.6333	6.82356	4.90007	4.07727	2.89639	6.65082	7.74577	5.69431	6.34019	5.3686	5.54817	10.4529	9.42266	7.70485	10.008	7.49826	4.33453
TCGA-BH-A0BV-01	Low	0.986366	11.1611	11.8136	11.5902	6.73764	5.56873	5.73625	2.32472	7.87858	8.64635	6.34519	6.88219	5.04223	5.20798	11.2936	10.1665	8.09366	9.67415	5.72244	1.96025
TCGA-BH-A0BW-01	High	1.28465	12.5884	12.8057	12.4689	8.51746	6.81216	6.43745	6.68653	9.57622	9.54172	8.0666	9.01561	7.40893	7.09605	12.7882	12.3481	11.5104	11.4243	7.90646	5.25223
TCGA-BH-A0BZ-01	Low	0.732321	11.1611	11.9737	11.4277	7.31819	6.11546	5.90429	3.0494	8.22328	9.39133	6.00506	8.29279	6.78908	6.48041	11.905	10.0741	9.36016	10.7615	6.82721	3.10559
TCGA-BH-A0C0-01	Low	0.974841	10.8738	11.4139	10.4714	8.12679	6.78103	6.41272	3.85736	9.18571	9.56878	8.5325	5.57324	8.8976	5.68134	12.6822	12.0485	11.4492	9.86554	6.27196	3.38965
TCGA-BH-A0C1-01	Low	1.04999	9.92837	11.6412	10.5075	6.59922	5.29239	5.36647	2.93278	7.6414	8.45633	6.66566	4.62679	7.4649	4.83107	11.3406	10.3095	7.33834	9.59243	5.83828	3.79587
TCGA-BH-A0C3-01	High	1.17529	10.12	10.7348	10.2869	7.12078	5.63247	5.41384	2.47729	7.70824	8.68768	7.13419	6.31285	5.77662	5.66648	11.3547	10.5681	7.80201	10.1177	5.83958	1.83098
TCGA-BH-A0C7-01	High	1.20962	10.2675	11.3365	10.1197	6.81472	4.88776	4.49064	3.33255	7.33771	7.62206	5.57687	6.65665	5.43838	5.1368	10.8744	9.65676	7.72135	9.43642	5.96371	3.60864
TCGA-BH-A0DD-01	High	1.52688	10.6511	11.3616	10.4721	5.92575	4.61574	4.04441	2.14363	6.86335	7.51891	5.72134	3.89658	5.08089	3.17681	10.4843	9.74962	6.97269	9.15728	5.49981	3.26743
TCGA-BH-A0DE-01	Low	0.860721	10.193	10.8738	10.4982	7.14912	5.70437	5.54394	2.38612	8.24296	9.05066	6.96198	2.3384	7.89306	4.97685	11.6786	11.071	9.94509	9.88687	5.74509	2.04551
TCGA-BH-A0DG-01	Low	1.07598	10.1618	10.6607	10.2944	6.98715	5.70245	5.17671	2.78778	6.89416	8.4704	6.76504	6.63671	6.6016	4.93443	11.3347	10.2076	6.99945	9.51192	5.37599	3.87248
TCGA-BH-A0DH-01	Low	0.683888	10.3047	10.2152	10.5092	6.20847	4.53815	4.11439	2.9399	7.42941	8.03359	6.17646	4.87946	6.29281	4.85862	10.3807	9.89589	6.51848	9.06271	5.09121	3.06902
TCGA-BH-A0DI-01	High	1.2217	10.3259	10.7767	10.341	6.97344	5.53875	5.35704	3.14007	7.6317	9.08534	7.03242	6.27572	6.05634	6.08415	11.229	10.6203	7.40438	9.83418	5.39202	2.63648
TCGA-BH-A0DK-01	Low	0.844378	10.4173	11.2064	11.2876	7.13045	5.39877	5.68857	3.42086	8.42474	8.88809	7.36396	6.44188	6.71413	5.76191	11.4086	10.9354	8.23257	10.1479	6.00553	3.12216
TCGA-BH-A0DL-01	Low	0.847841	10.0087	10.5301	10.0114	6.961	6.06198	5.58863	3.52672	7.71856	8.90067	7.0524	7.20045	6.89908	6.36556	11.9859	10.5387	8.78424	9.96618	5.84241	1.84709
TCGA-BH-A0DO-01	Low	1.05111	8.41814	9.44374	9.56774	6.09335	4.36325	4.65328	3.08652	6.96707	7.59256	4.04299	5.98253	4.96089	4.51712	10.1823	8.07424	7.29162	8.93799	4.38067	2.62431
TCGA-BH-A0DP-01	Low	0.683371	10.0826	11.072	10.9634	7.63588	5.89358	5.50328	3.19066	8.35118	9.07801	6.88056	6.7575	7.44282	4.9641	11.8887	10.8314	10.391	9.64764	5.70838	2.47846
TCGA-BH-A0DQ-01	High	1.30755	10.4314	10.5482	10.1137	6.38907	4.76522	4.28714	1.414	7.28048	7.99563	5.65233	4.27996	6.10302	4.06468	10.5247	9.99599	6.91381	9.90568	5.4602	3.72629
TCGA-BH-A0DS-01	Low	1.03161	9.51544	10.5543	10.3447	7.37973	5.68198	4.35185	2.83224	7.38381	8.28829	5.90544	4.20132	6.56847	5.09541	11.3759	10.6326	7.35125	9.34553	5.48175	2.13606
TCGA-BH-A0DT-01	Low	0.761388	9.84935	10.5722	10.1836	7.21045	5.41526	5.27386	3.33299	7.52468	8.73287	7.19416	6.38623	7.44704	6.82126	11.449	10.7892	7.86287	9.43324	5.87188	3.89328
TCGA-BH-A0DV-01	Low	0.969683	9.95805	10.4453	10.3758	7.01172	5.22235	4.76841	2.45835	7.97052	8.81983	6.37392	4.80893	6.12973	4.41174	11.3607	10.6044	7.68377	10.1344	5.06074	3.11958
TCGA-BH-A0DX-01	High	1.16528	10.5801	10.9854	10.7304	7.44608	5.46455	3.92619	1.6775	7.22368	8.26701	5.5441	5.72571	6.60237	3.57961	10.9083	10.0346	9.40697	9.7125	5.22738	2.56535
TCGA-BH-A0DZ-01	High	1.12074	10.6802	11.1709	11.1024	7.11239	5.47552	5.15368	2.24939	8.27774	8.92876	7.47203	3.96269	7.36541	3.00423	12.0571	11.2954	10.056	9.6866	5.14612	2.66872
TCGA-BH-A0E0-01	High	1.28566	8.21036	8.65452	8.12502	5.60914	3.84942	4.08246	1.71384	6.36421	7.43771	4.82745	5.65855	5.67668	4.66809	9.85499	8.62257	6.7032	8.35402	3.73984	1.06154
TCGA-BH-A0E1-01	High	1.12409	10.7209	11.7004	11.0336	4.92132	3.24073	2.67674	1.24647	5.76941	6.5002	3.7713	4.34794	3.61095	2.9281	9.0429	7.8384	6.06574	8.80195	5.78584	4.27739
TCGA-BH-A0E2-01	High	1.13282	9.80085	10.7039	10.0778	5.47133	3.99533	3.68799	2.03715	6.29434	7.5368	5.38803	3.40037	6.5489	1.27623	9.87529	9.47459	6.11139	9.41931	4.7938	2.82413
TCGA-BH-A0E6-01	Low	0.260718	10.4586	10.5142	9.54499	5.89589	3.87403	3.38209	5.03149	5.76768	7.49641	4.54417	5.47361	6.37676	2.70676	9.95842	8.96573	7.28997	9.21377	6.24183	3.46262
TCGA-BH-A0E7-01	High	1.33995	9.27224	9.24588	9.41438	5.85796	4.03682	4.28047	0.553292	6.88936	7.22032	5.07154	3.7728	5.40738	3.87489	10.0731	9.41877	7.26199	8.54765	3.68167	2.66517
TCGA-BH-A0E9-01	Low	0.857028	8.97532	10.0867	10.4869	6.56418	5.01259	5.24837	3.20802	7.76272	8.44183	5.81544	6.40102	6.89233	4.69447	10.8088	9.5326	7.70879	9.51783	4.67397	1.48839
TCGA-BH-A0EA-01	Low	0.863539	9.75434	10.3765	10.3217	6.85408	5.32762	4.92707	2.27361	7.28376	8.50014	5.97059	5.58585	6.57892	7.25316	10.8472	10.2855	9.2355	9.64908	5.22647	3.26471
TCGA-BH-A0EB-01	Low	0.87554	10.9993	12.0373	11.9576	7.88134	6.28497	6.26398	3.36404	9.05474	9.74762	7.39649	7.93104	8.64208	7.39334	12.5605	11.6366	11.0593	10.0705	6.11215	3.17498
TCGA-BH-A0EE-01	Low	0.914446	12.4036	13.1025	12.5138	8.30745	6.18894	4.05749	3.90821	9.41893	9.83244	5.83122	6.86396	5.2288	5.46488	12.5064	12.1118	9.21179	10.2908	8.43747	3.86026
TCGA-BH-A0EI-01	Low	1.05789	9.66075	10.6788	10.6165	5.64587	4.31333	4.57599	1.04376	7.04096	7.42932	5.13719	3.39585	5.95923	3.81474	10.0824	9.43568	8.25181	8.55152	5.01221	2.83411
TCGA-BH-A0GY-01	High	1.81057	9.76401	10.0787	9.70042	6.81856	4.74724	4.19254	1.96373	7.62168	7.73009	6.59446	4.73227	7.03536	4.82868	11.2576	10.6562	7.9976	9.28493	5.04906	2.44166
TCGA-BH-A0GZ-01	High	1.21926	9.60492	10.0932	10.0461	6.0507	4.03237	3.50621	2.56716	6.43214	7.70094	5.74439	5.75906	6.4879	5.73963	9.95582	9.30532	6.5028	9.08753	4.65046	3.1474
TCGA-BH-A0H0-01	High	1.16191	8.34427	8.99923	9.26221	5.66876	4.22577	4.30682	1.3781	7.16159	7.37647	4.88821	5.39041	5.8258	2.84334	10.0394	8.95371	8.44749	8.6008	4.21554	1.90417
TCGA-BH-A0H3-01	Low	0.969478	9.56849	9.94577	9.77847	6.61728	5.32656	5.24568	2.39389	8.11281	8.56788	6.87159	5.33611	6.943	5.01941	11.2638	10.5014	9.23629	9.56913	5.21269	0.965379
TCGA-BH-A0H5-01	Low	0.571427	11.8063	12.6747	12.1038	8.6681	7.30715	6.88205	6.08132	9.89378	10.6169	8.65687	9.20601	8.66026	7.71285	13.4179	11.8814	10.3267	11.1804	7.75345	4.5084
TCGA-BH-A0H6-01	High	1.40628	9.37729	9.75418	9.68382	6.02496	4.43042	3.88581	0.991953	7.11019	7.6995	5.04078	5.87379	6.66099	4.70407	10.3897	9.47166	8.86341	8.9002	4.37484	1.34394
TCGA-BH-A0H7-01	High	1.2785	10.4152	10.7758	11.2649	6.40247	4.64734	3.80826	1.80163	6.33906	7.7509	5.79575	5.10351	4.95454	4.83041	10.4646	9.50864	7.43519	9.46051	6.1112	0.59494
TCGA-BH-A0H9-01	High	1.32611	8.22678	9.00887	9.16155	5.91015	4.15075	3.67284	1.3814	6.85878	7.393	4.50995	5.23272	5.86583	4.08564	10.0595	8.84156	6.7604	8.79188	3.48918	2.53626
TCGA-BH-A0HA-01	Low	0.74268	11.3376	12.1955	11.6505	7.0405	4.95098	5.09213	3.64625	8.08734	8.44562	6.75988	4.22469	7.83503	5.01274	11.1836	10.845	10.4576	10.1991	6.52102	2.56297
TCGA-BH-A0HB-01	High	1.13276	10.4707	10.754	10.3947	6.92874	5.25195	4.5155	1.99346	7.53647	8.60123	7.06729	7.82576	6.45712	6.00712	11.2919	10.5771	8.47836	9.33524	5.21493	1.0447
TCGA-BH-A0HF-01	High	1.14867	10.3725	10.9474	10.4854	7.00285	5.49138	4.8252	2.63239	7.60743	8.82578	6.5373	5.94301	5.85092	5.83174	11.3445	10.6451	7.73942	9.6861	5.61477	2.29143
TCGA-BH-A0HI-01	Low	1.02845	10.4344	11.116	10.9852	6.35846	4.80396	4.84949	1.72096	7.79189	8.23379	5.5357	6.11707	6.53825	4.64508	10.74	9.54246	9.23522	9.23222	5.19986	3.48095
TCGA-BH-A0HK-01	High	1.08472	9.15261	9.52204	9.42719	5.97471	4.27274	4.464	2.35701	7.2572	7.82807	5.55587	4.50251	5.75021	3.68408	10.4411	9.35265	6.6781	9.27112	4.74829	2.49696
TCGA-BH-A0HL-01	High	1.08395	9.68706	9.71851	10.3079	4.20908	2.86864	2.58046	1.37334	4.9482	5.74536	3.43745	1.04405	5.03365	1.43309	8.18378	7.48274	4.58218	7.69496	4.57894	1.79689
TCGA-BH-A0HN-01	Low	0.863975	9.12195	10.4211	11.4056	6.82071	4.39415	3.48411	0.256149	7.51594	7.92496	4.81109	2.74088	5.3662	3.69221	10.5038	10.0677	7.43854	7.64951	4.41603	2.37782
TCGA-BH-A0HO-01	Low	0.913439	11.1065	12.0643	12.0205	6.37203	5.12202	4.54957	1.28612	7.72056	8.04126	5.62434	6.03008	6.77977	3.95892	10.9099	10.0935	9.46304	9.2834	6.22947	3.99048
TCGA-BH-A0HP-01	Low	0.942574	10.1382	11.0108	10.5172	6.88715	5.48657	5.69228	2.69256	8.49356	9.05381	6.71567	5.34079	7.26732	5.75559	11.3884	10.7483	9.67311	9.77125	5.66607	3.08998
TCGA-BH-A0HQ-01	Low	1.06721	9.94013	10.2074	11.3401	6.14432	4.71065	4.76805	1.621	7.22638	7.91274	5.97608	5.78216	6.10939	5.83611	10.5273	9.93091	7.16152	9.16106	4.84725	1.62573
TCGA-BH-A0HU-01	Low	0.957022	10.5124	11.2213	10.624	6.88591	4.54543	3.73505	2.46091	7.47425	7.82695	5.87953	4.16791	7.24895	4.59232	10.7669	10.3514	7.60789	9.33195	6.12755	4.01237
TCGA-BH-A0HW-01	High	1.11404	9.28945	9.37219	9.0262	3.59421	2.28148	1.30668	0.215017	3.07713	5.45837	2.36616	3.90594	4.19132	1.49868	7.25354	7.64682	6.77661	8.32784	4.62398	2.24071
TCGA-BH-A0HX-01	High	1.0913	9.7327	10.4214	9.27966	5.82345	4.45961	3.93519	1.48103	6.97081	7.48921	5.59439	4.26565	5.79003	3.73235	10.1844	9.49542	6.69399	9.23444	5.06457	2.11669
TCGA-BH-A0HY-01	High	1.13553	10.5101	10.1058	9.85378	4.76825	3.09939	3.29292	0.700339	5.39449	6.68947	4.18624	4.67064	4.89659	2.68301	9.08381	8.19264	7.60889	8.82897	4.84768	2.82415
TCGA-BH-A0RX-01	Low	0.342016	11.3558	12.291	11.2766	7.69049	5.6695	4.69384	4.58918	8.65174	9.17024	6.92019	7.01015	7.34939	4.52108	12.27	10.9482	8.9309	10.9912	7.54597	4.06184
TCGA-BH-A0W3-01	Low	0.9967	9.11289	8.93844	10.3091	6.37806	5.1734	5.13775	2.15978	8.11292	8.3687	6.47103	4.91573	6.885	5.06637	10.9293	10.181	7.35309	8.72457	4.93827	1.65868
TCGA-BH-A0W4-01	Low	1.03311	9.29033	9.47413	10.0888	5.70828	4.04314	3.95854	1.74871	6.29504	7.23111	5.27822	4.81292	5.22143	4.66776	9.94442	9.0776	6.51399	8.71703	4.19268	1.54894
TCGA-BH-A0W5-01	Low	0.748351	10.138	10.8721	10.4091	7.5819	6.36933	6.53863	4.82421	8.62005	9.06138	7.09202	7.21	7.28894	5.73938	11.9523	10.5585	10.0257	10.1284	6.14995	2.6424
TCGA-BH-A0W7-01	Low	0.811074	10.7229	12.0502	11.6691	8.97565	6.98239	6.02589	3.73494	9.01537	9.54628	7.02553	8.95508	6.6231	6.60366	12.85	11.384	10.3146	10.1184	6.67422	2.58219
TCGA-BH-A0WA-01	Low	0.916325	10.4716	11.4336	10.7468	6.94571	5.5292	5.80271	4.03107	7.78567	7.9544	5.24948	7.4917	6.37567	6.02272	11.2063	9.23431	8.36889	9.68909	6.44138	3.80953
TCGA-BH-A18F-01	Low	0.857976	10.3334	11.102	10.5491	6.91644	4.87224	4.93321	2.93492	7.71656	8.41723	6.447	5.17833	7.49311	5.64304	11.2484	10.573	9.62562	9.63913	5.87607	3.29174
TCGA-BH-A18G-01	High	1.29491	10.2931	9.86569	9.85766	5.89138	3.86279	3.81184	2.30258	6.98188	7.44308	5.25992	1.70032	6.79662	3.92104	9.77045	9.13035	8.91778	9.23357	5.05799	1.25204
TCGA-BH-A18H-01	Low	0.779703	11.3236	11.7349	11.3475	6.86031	5.3971	5.40156	4.21674	8.26037	8.99708	7.12146	3.53267	7.96891	4.82537	11.5008	10.7931	7.9078	10.4459	6.97801	2.27334
TCGA-BH-A18I-01	High	1.1323	10.7064	11.4824	10.4588	7.58766	6.26651	5.35892	2.96185	8.31998	9.34113	7.07591	7.69485	8.10402	6.2399	11.9945	10.8154	10.122	9.87971	6.3127	3.59442
TCGA-BH-A18J-01	High	1.44359	10.0651	10.8555	11.035	6.39796	4.88913	4.20351	0.735741	7.05733	7.64328	6.13348	5.25448	6.84999	4.6904	10.5868	9.95888	8.96749	9.07863	5.00202	3.16748
TCGA-BH-A18K-01	High	1.20566	9.42076	10.6075	10.4113	6.27312	4.72247	3.46366	1.16482	6.49771	7.11552	5.45157	5.34159	5.61754	5.05298	10.4657	9.42391	8.84402	8.69005	4.79748	2.35599
TCGA-BH-A18L-01	High	1.38353	11.6233	11.6412	12.0338	5.13095	4.0795	3.88776	0.861933	6.31631	6.83505	4.85445	4.7502	5.53363	2.88089	9.72951	8.61605	6.49912	9.72526	6.07322	3.03199
TCGA-BH-A18M-01	High	1.30879	10.6462	11.3309	10.6937	7.04299	5.09276	4.56572	2.45989	8.13683	8.17882	6.32537	1.50052	6.72304	1.76803	11.343	10.311	7.87539	9.82037	6.59668	4.13793
TCGA-BH-A18N-01	High	1.2074	9.67223	10.105	9.75239	5.98088	4.75657	4.66119	0.876256	7.3711	7.80005	5.92569	3.22553	6.24853	2.94461	10.3048	9.82391	9.49107	8.9857	4.3287	2.422
TCGA-BH-A18P-01	Low	0.735483	10.8581	11.3743	10.8237	7.73417	6.05663	5.45764	2.65571	8.85446	8.89805	6.62141	6.28464	7.87382	7.36047	12.2557	11.2793	8.98102	9.67637	5.71649	3.46442
TCGA-BH-A18Q-01	Low	1.04518	11.2689	11.9445	11.6254	8.21927	5.87564	5.90007	6.14011	9.05692	9.27697	7.45417	4.40665	8.30711	3.2018	12.3296	11.4588	10.6372	10.6523	7.40047	5.13919
TCGA-BH-A18R-01	High	1.46764	9.52002	10.1029	9.35031	6.21452	4.85176	5.02591	2.37398	7.08249	7.78764	5.70366	6.15713	5.2698	4.77972	10.7749	9.30343	7.24448	9.10978	4.96519	2.61782
TCGA-BH-A18S-01	High	1.09317	8.72749	9.71106	9.84289	5.71363	4.65994	4.12229	0.642153	7.07303	7.46474	5.08536	5.70252	5.96894	3.64389	10.1933	8.84905	6.85639	7.86029	3.8555	3.11244
TCGA-BH-A18T-01	High	1.2531	10.9844	10.9825	9.61899	5.2755	3.70338	3.3065	4.22237	5.88971	6.499	5.10427	0.78068	5.93612	0.970222	9.50611	8.87963	6.53088	8.71397	6.15282	2.86297
TCGA-BH-A18U-01	High	1.16088	9.82001	10.7686	10.9206	7.22352	5.43912	4.71954	1.90901	8.06601	7.82826	6.82948	1.03549	6.84094	3.38777	11.4157	10.5327	7.97762	9.22178	4.73344	1.37695
TCGA-BH-A18V-01	High	1.36713	12.1922	12.7993	11.7469	7.60478	5.95685	6.79761	4.36566	7.64068	8.60276	7.70036	4.22892	7.99475	2.79411	11.7824	10.9035	8.2462	10.1814	8.24037	8.63137
TCGA-BH-A18V-06	Low	0.628292	12.9334	13.7115	13.0495	9.13394	7.49638	9.23326	7.37287	9.69828	11.2393	9.68419	6.7808	10.0784	7.3103	13.8481	13.1072	10.6524	11.5727	9.1866	10.4248
TCGA-BH-A1EN-01	High	1.26233	7.54813	8.61334	8.44482	5.6746	4.30627	4.22033	0.953375	6.41864	7.01473	4.31603	4.95139	4.23411	3.93878	9.7328	8.29335	6.36888	8.01816	3.24281	1.69081
TCGA-BH-A1EO-01	High	1.72144	9.99617	11.0018	10.3722	7.35394	6.03239	5.82029	2.13783	8.35964	8.14496	7.05113	6.08758	7.77935	5.46757	11.9754	10.8359	7.94157	9.30575	4.53838	3.18594
TCGA-BH-A1ES-01	High	1.58136	8.62232	9.00222	9.29047	5.12426	3.74004	3.39014	1.44096	6.14204	6.34319	4.298	0.453099	5.71278	2.17383	8.92264	8.49731	7.91617	8.25356	3.78882	0
TCGA-BH-A1ES-06	High	1.26006	9.88074	9.82058	10.1576	4.19054	1.85376	1.54175	0.44245	4.2843	5.27986	2.15108	0.101553	4.36486	0.0390008	7.34856	7.9839	7.18166	9.16901	5.40523	0.287645
TCGA-BH-A1ET-01	Low	0.745553	8.16644	10.2063	10.1199	6.50728	5.17086	5.69414	2.44243	7.9201	7.90158	6.24507	4.81385	6.52919	4.83829	11.0772	9.7818	7.01446	8.75716	3.86441	2.88794
TCGA-BH-A1EU-01	High	1.34106	9.95587	10.8469	10.4542	7.57257	6.61028	6.50183	4.41452	8.66455	9.16236	6.4257	8.44738	6.58306	6.53519	12.3633	9.96087	8.93145	10.2203	5.50635	2.26077
TCGA-BH-A1EV-01	High	1.7465	9.12201	9.48291	9.70775	5.82898	4.58435	4.85726	1.57626	6.95441	7.41503	5.86825	0.953782	6.67402	2.81565	10.1711	9.62179	8.3932	8.13908	4.19987	1.6468
TCGA-BH-A1EW-01	High	1.51087	10.1284	10.9286	10.6652	6.18629	4.7394	4.37185	2.62511	7.13446	7.66851	6.43271	0.344063	7.15057	1.41122	10.7563	10.2245	9.07629	9.89446	5.57644	1.3949
TCGA-BH-A1EX-01	High	1.30491	10.1368	10.8257	10.4099	7.27523	6.1081	5.88144	2.55261	7.89848	8.52919	6.76947	7.52473	6.481	6.05576	11.8378	10.4904	8.91945	9.34347	5.56529	1.154
TCGA-BH-A1EY-01	High	1.7919	9.55295	10.2564	10.2111	7.42482	6.28094	6.21292	3.06294	8.80114	9.07395	7.74784	7.13728	7.21651	7.07472	11.9338	10.9484	8.50035	9.55933	5.34715	2.66693
TCGA-BH-A1F0-01	High	1.60487	10.9808	11.8896	10.9984	7.73186	6.65173	5.8956	4.73961	8.74022	8.87011	6.48328	8.38327	6.18917	5.74414	12.3098	10.3236	9.31767	10.6169	6.67894	4.15922
TCGA-BH-A1F2-01	High	1.85179	9.07588	9.92391	9.8189	6.55731	4.8387	4.12831	0.761713	6.90692	6.64505	4.95499	4.79966	4.88309	2.92304	10.3925	8.64501	5.98674	8.37894	3.09895	2.2326
TCGA-BH-A1F5-01	High	1.28563	7.53578	8.58631	8.71421	6.13649	4.49245	3.36714	1.25902	7.39231	6.8449	5.64392	2.68836	5.65549	2.70467	10.4701	9.51591	4.57545	7.28843	2.71731	0.864398
TCGA-BH-A1F6-01	High	1.10133	9.721	10.4678	9.90257	6.13503	5.1774	4.71917	2.91713	6.86284	7.57822	5.5346	6.34967	4.9777	4.66598	10.6368	9.50701	7.74502	9.52993	5.05858	3.31334
TCGA-BH-A1F8-01	High	1.57632	9.58837	11.0528	11.2846	6.47017	4.28712	4.1346	2.81395	6.79051	6.11868	5.01211	5.99852	4.46127	3.67524	9.94734	8.34588	5.87981	9.14208	5.22633	2.15384
TCGA-BH-A1FB-01	High	1.40679	10.638	11.5741	10.5974	8.20652	6.55122	6.93477	5.16521	9.03636	9.78403	8.10848	9.04086	7.78771	7.66007	12.9181	11.4695	9.97681	10.388	6.02908	4.26364
TCGA-BH-A1FC-01	Low	0.685026	9.71703	10.9651	10.2149	6.82908	5.48662	5.43013	4.07378	7.62041	8.12163	6.47676	6.3842	7.19092	4.94834	11.4548	10.4207	9.21829	9.66379	6.3982	1.64786
TCGA-BH-A1FD-01	High	1.74238	9.22038	10.4803	9.97903	5.79269	4.53401	4.32682	0.703636	7.12963	7.04212	6.30297	3.18959	6.78535	1.55056	10.3163	9.79591	8.45099	8.44753	5.00488	3.28462
TCGA-BH-A1FE-01	Low	1.04232	9.65498	10.7319	10.553	7.1059	5.79632	5.79897	3.98084	7.88473	8.31769	6.84523	7.39	6.47098	6.20866	11.677	9.94314	7.71895	9.46229	5.1726	1.91375
TCGA-BH-A1FE-06	High	2.21292	10.8692	11.0731	10.9896	6.63722	4.49267	4.71524	1.14887	6.40327	7.28826	3.61363	4.33983	4.66221	4.11757	10.2988	8.95891	7.15089	10.2603	5.88991	2.72215
TCGA-BH-A1FG-01	High	1.34809	9.05547	10.2169	10.0512	5.99716	4.04208	3.21745	1.43679	7.1076	6.8012	5.96519	5.69541	4.50601	4.14698	10.2408	9.11052	6.18271	8.64666	3.94888	1.73289
TCGA-BH-A1FH-01	High	1.2193	9.65663	10.2595	10.046	6.35826	5.05097	4.86068	2.56427	7.72762	8.0641	5.16966	5.78717	5.12402	4.5787	10.6799	9.48411	7.72432	9.85409	5.24297	3.0926
TCGA-BH-A1FJ-01	High	1.10536	10.0573	10.4998	10.057	4.79005	3.82513	3.58907	0.836595	6.16057	6.18453	3.75886	4.4161	3.97123	3.44713	9.29779	7.80705	5.99563	8.47092	5.59855	2.86017
TCGA-BH-A1FL-01	High	1.08959	8.80918	9.31779	9.71753	6.45047	4.6536	4.83851	2.61575	7.33103	7.51517	5.54307	3.21474	6.82402	2.82225	10.4355	9.96387	9.48744	8.72519	4.40672	1.48039
TCGA-BH-A1FM-01	High	1.96334	8.61014	9.22308	9.35212	5.97012	4.34081	3.49396	0.387246	6.2428	6.2824	5.75707	4.88173	4.25629	3.47963	9.93647	8.6635	5.21755	7.96935	2.31774	1.65522
TCGA-BH-A1FN-01	High	1.77439	10.4415	11.4337	10.8122	6.36491	4.21426	2.87109	2.35844	6.53821	6.41781	3.48952	2.60801	3.45918	3.62601	10.7261	9.24572	5.8236	9.09821	5.55584	3.22817
TCGA-BH-A1FR-01	High	1.15624	9.22489	10.365	10.579	6.79804	5.50035	5.30475	2.2288	7.80573	8.71853	6.39423	3.47001	7.51019	1.15606	11.1131	10.1194	7.20441	8.94705	5.04075	3.38954
TCGA-BH-A1FU-01	High	1.31966	9.27694	10.1411	9.85311	6.26832	4.97931	5.5062	3.36729	7.6457	8.11682	6.52429	3.63464	6.80437	2.36095	10.8338	9.78494	8.81436	9.70052	5.1045	2.65897
TCGA-BH-A201-01	High	1.48091	10.2517	10.6003	9.67501	5.55921	4.00015	3.85936	1.50567	5.28661	6.80715	4.53388	4.33436	5.23414	2.19188	9.5874	8.46834	6.53611	9.48056	5.40323	1.84194
TCGA-BH-A202-01	High	1.14906	10.5613	11.0165	10.5382	7.43729	6.24311	5.32659	4.29603	7.98655	8.62493	7.27162	5.79185	7.8242	5.29569	11.9405	10.8885	7.88371	9.63068	6.06493	2.70588
TCGA-BH-A203-01	High	1.14564	9.7729	10.3496	10.1633	6.73925	5.22615	4.67327	3.43433	7.89705	8.16937	7.11865	5.89272	6.95507	5.06149	11.3534	10.3446	9.26757	9.24281	5.38014	1.93467
TCGA-BH-A204-01	High	1.2218	6.90995	8.40537	8.54574	5.79188	4.53236	4.51817	1.04806	7.07104	6.61522	5.40035	5.22809	5.30381	2.86297	10.3334	8.21721	7.68349	7.34003	2.24283	0.909408
TCGA-BH-A208-01	High	1.50047	9.33569	9.7936	9.29083	6.55564	5.08673	4.78306	2.20479	7.33747	8.10327	6.86419	5.97254	6.61252	4.75116	10.8869	9.89464	7.21081	9.41474	4.46408	2.15775
TCGA-BH-A209-01	Low	0.680567	10.2741	11.1739	9.76185	7.64663	6.50176	5.96745	4.76411	8.6651	8.77708	7.18578	7.13624	7.60371	5.55374	12.1472	11.1313	10.177	9.93749	6.18592	2.94192
TCGA-BH-A28O-01	Low	0.761579	9.75774	10.2758	10.3698	6.42017	4.59181	4.86812	2.82029	7.7622	8.29766	5.58856	1.2759	6.90381	3.23864	10.6135	9.96724	8.97669	10.0984	5.9281	2.98591
TCGA-BH-A28Q-01	Low	0.947807	9.03806	9.58132	9.63156	6.05963	4.83876	5.32092	2.32199	7.5549	7.97373	6.14984	4.76887	6.7436	5.02076	10.6047	9.74622	8.67061	8.64133	4.4576	2.53054
TCGA-BH-A2L8-01	Low	0.97353	11.5541	12.3945	11.1451	8.32264	6.93101	6.79981	4.95868	9.49194	10.1447	7.77227	8.44472	7.69776	7.79577	13.0519	11.7231	10.1378	10.4584	7.08623	4.2521
TCGA-BH-A42T-01	High	1.42796	10.1495	10.4867	10.302	7.61753	5.64245	5.5794	3.14318	8.43517	9.40479	7.17872	3.39432	8.59611	4.71569	11.5967	11.1131	9.03537	9.12119	5.7193	3.66614
TCGA-BH-A42U-01	Low	0.881928	10.5287	10.9735	11.03	7.30838	5.10409	4.93142	4.22601	7.41093	9.47811	5.96437	6.95806	7.64279	5.68712	11.1558	10.6634	9.85723	10.5172	6.87127	1.58405
TCGA-BH-A42V-01	Low	0.923149	9.90603	10.4293	10.2573	6.52755	4.93444	5.20874	3.20122	6.57291	8.97599	5.86393	6.35192	7.08829	4.98385	10.9502	10.5024	6.91513	9.86632	5.80002	2.9419
TCGA-BH-A5IZ-01	High	1.23155	10.7364	10.5511	10.3679	5.57272	3.66763	3.08335	4.08954	5.04474	6.80535	4.22982	2.59458	5.90575	2.75177	8.981	8.70285	7.29731	8.71578	6.42396	2.99475
TCGA-BH-A5J0-01	High	1.11227	11.6033	12.2789	11.8265	8.01092	6.49826	6.33508	3.49507	9.00359	9.99426	8.10426	4.15379	9.39632	6.30996	12.0113	12.032	10.6405	10.3403	7.34301	4.50726
[truncated: 431 more rows]
